# Supplementary material
Source: publisher figshare collection journal article supplement (https://acs.figshare.com/ndownloader/files/8207978)
Supplement: Supplementary file 1 [file 8207978]

data_L4-Me2
#rjm_10_073_hklf5
_audit_creation_date              2016-06-13
_audit_creation_method
;
Olex2 1.2
(compiled 2016.02.19 svn.r3266 for OlexSys, GUI svn.r5155)
;
_publ_contact_author_address      ?
_publ_contact_author_email        ?
_publ_contact_author_name         ''
_publ_contact_author_phone        ?
_publ_section_references
;
Dolomanov, O.V., Bourhis, L.J., Gildea, R.J, Howard, J.A.K. & Puschmann, H.
 (2009), J. Appl. Cryst. 42, 339-341.

Sheldrick, G.M. (2008). Acta Cryst. A64, 112-122.

Sheldrick, G.M. (2015). Acta Cryst. C71, 3-8.
;
_chemical_name_common             ?
_chemical_name_systematic         ?
_chemical_formula_moiety          '2(C13 H8 F O2)'
_chemical_formula_sum             'C26 H16 F2 O4'
_chemical_formula_weight          430.39
_chemical_melting_point           ?
loop_
  _atom_type_symbol
  _atom_type_description
  _atom_type_scat_dispersion_real
  _atom_type_scat_dispersion_imag
  _atom_type_scat_source
 'C' 'C' 0.0033 0.0016 'International Tables Vol C Tables 4.2.6.8 and 6.1.1.4'
 'H' 'H' 0.0000 0.0000 'International Tables Vol C Tables 4.2.6.8 and 6.1.1.4'
 'F' 'F' 0.0171 0.0103 'International Tables Vol C Tables 4.2.6.8 and 6.1.1.4'
 'O' 'O' 0.0106 0.0060 'International Tables Vol C Tables 4.2.6.8 and 6.1.1.4'

_shelx_space_group_comment
;
The symmetry employed for this shelxl refinement is uniquely defined
by the following loop, which should always be used as a source of
symmetry information in preference to the above space-group names.
They are only intended as comments.
;
_space_group_crystal_system       'triclinic'
_space_group_IT_number            2
_space_group_name_H-M_alt         'P -1'
_space_group_name_Hall            '-P 1'
loop_
  _space_group_symop_operation_xyz
 'x, y, z'
 '-x, -y, -z'

_cell_length_a                    6.731(2)
_cell_length_b                    8.064(3)
_cell_length_c                    18.313(6)
_cell_angle_alpha                 88.061(10)
_cell_angle_beta                  86.847(9)
_cell_angle_gamma                 83.466(9)
_cell_volume                      985.6(6)
_cell_formula_units_Z             2
_cell_measurement_reflns_used     995
_cell_measurement_temperature     100(2)
_cell_measurement_theta_max       23.59
_cell_measurement_theta_min       2.23
_shelx_estimated_absorpt_T_max    ?
_shelx_estimated_absorpt_T_min    ?
_exptl_absorpt_coefficient_mu     0.110
_exptl_absorpt_correction_T_max   0.7452
_exptl_absorpt_correction_T_min   0.4572
_exptl_absorpt_correction_type    multi-scan
_exptl_absorpt_process_details
;
SADABS-2014/5 (Bruker,2014/5) was used for absorption correction.
wR2(int) was 0.1014 before and 0.0732 after correction.
The Ratio of minimum to maximum transmission is 0.6135.
The \l/2 correction factor is 0.00150.
;
_exptl_absorpt_special_details    ?
_exptl_crystal_colour             colourless
_exptl_crystal_colour_primary     colourless
_exptl_crystal_density_diffrn     1.450
_exptl_crystal_density_meas       ?
_exptl_crystal_density_method     ?
_exptl_crystal_description        rod
_exptl_crystal_F_000              444
_exptl_crystal_size_max           0.48
_exptl_crystal_size_mid           0.16
_exptl_crystal_size_min           0.15
_exptl_transmission_factor_max    ?
_exptl_transmission_factor_min    ?
_diffrn_reflns_av_R_equivalents   0.0732
_diffrn_reflns_av_unetI/netI      0.1445
_diffrn_reflns_Laue_measured_fraction_full 0.991
_diffrn_reflns_Laue_measured_fraction_max 0.991
_diffrn_reflns_limit_h_max        8
_diffrn_reflns_limit_h_min        -8
_diffrn_reflns_limit_k_max        9
_diffrn_reflns_limit_k_min        -9
_diffrn_reflns_limit_l_max        21
_diffrn_reflns_limit_l_min        -21
_diffrn_reflns_number             15630
_diffrn_reflns_point_group_measured_fraction_full 0.991
_diffrn_reflns_point_group_measured_fraction_max 0.991
_diffrn_reflns_theta_full         25.289
_diffrn_reflns_theta_max          25.289
_diffrn_reflns_theta_min          1.114
_diffrn_ambient_temperature       100(2)
_diffrn_detector_area_resol_mean  ?
_diffrn_measured_fraction_theta_full 0.991
_diffrn_measured_fraction_theta_max 0.991
_diffrn_measurement_device_type   KappaCCD
_diffrn_measurement_method        '\f and \w scans'
_diffrn_radiation_type            MoK\a
_diffrn_radiation_wavelength      0.71073
_diffrn_source                          'Enraf Nonius FR590'
_diffrn_standards_number          0
_reflns_Friedel_coverage          0.000
_reflns_Friedel_fraction_full     .
_reflns_Friedel_fraction_max      .
_reflns_number_gt                 8625
_reflns_number_total              15546
_reflns_special_details
;
 _reflns_Friedel_fraction is defined as the number of unique
 Friedel pairs measured divided by the number that would be
 possible theoretically, ignoring centric projections and
 systematic absences.
;
_reflns_threshold_expression      'I > 2\s(I)'
_computing_data_collection              'Collect (Bruker AXS BV, 1997-2004)'
_computing_cell_refinement         'Bruker APEX2'
_computing_data_reduction        'Bruker SAINT'
_computing_molecular_graphics     'Olex2 (Dolomanov et al., 2009)'
_computing_publication_material   'Olex2 (Dolomanov et al., 2009)'
_computing_structure_refinement   'ShelXL (Sheldrick, 2015)'
_computing_structure_solution     'ShelXS (Sheldrick, 2008)'
_refine_diff_density_max          0.504
_refine_diff_density_min          -0.476
_refine_diff_density_rms          0.097
_refine_ls_extinction_coef        .
_refine_ls_extinction_method      none
_refine_ls_goodness_of_fit_ref    1.032
_refine_ls_hydrogen_treatment     constr
_refine_ls_matrix_type            full
_refine_ls_number_parameters      292
_refine_ls_number_reflns          15546
_refine_ls_number_restraints      216
_refine_ls_R_factor_all           0.1630
_refine_ls_R_factor_gt            0.0923
_refine_ls_restrained_S_all       1.027
_refine_ls_shift/su_max           0.000
_refine_ls_shift/su_mean          0.000
_refine_ls_structure_factor_coef  Fsqd
_refine_ls_weighting_details
'w=1/[\s^2^(Fo^2^)+(0.1025P)^2^+1.4035P] where P=(Fo^2^+2Fc^2^)/3'
_refine_ls_weighting_scheme       calc
_refine_ls_wR_factor_gt           0.2240
_refine_ls_wR_factor_ref          0.2650
_refine_special_details
;
 Refined as a 2-component twin.2-fold rotation about   
2.  1.  0. direct lattice direction identified using ROTAX
R O T A X : Simon Parsons & Bob Gould, University of Edinburgh
with additions by Richard Cooper (Oxford) and Louis Farrugia (Glasgow)
twin law
[   0.429    0.714    0.000]
[   1.142   -0.429    0.000]
[   0.274    0.137   -1.000]
;
_olex2_refinement_description
;
1. Twinned data refinement
 Scales: 0.727(6) 0.273(6)
2. Fixed Uiso
 At 1.2 times of:
  All C(H) groups
 At 1.5 times of:
  All C(H,H,H) groups
3. Rigid body (RIGU) restrains
 All non-hydrogen atoms
 with sigma for 1-2 distances of 0.004 and sigma for 1-3 distances of 0.004
4.a Aromatic/amide H refined with riding coordinates:
 C4(H4), C5(H5), C7(H7), C8(H8), C12(H12), C4A(H4A), C5A(H5A), C7A(H7A),
 C8A(H8A), C12A(H12A)
4.b Idealised Me refined as rotating group:
 C1(H1A,H1B,H1C), C1A(H1AA,H1AB,H1AC)
;
_atom_sites_solution_hydrogens    geom
_atom_sites_solution_primary      ?
_atom_sites_solution_secondary    ?
loop_
  _atom_site_label
  _atom_site_type_symbol
  _atom_site_fract_x
  _atom_site_fract_y
  _atom_site_fract_z
  _atom_site_U_iso_or_equiv
  _atom_site_adp_type
  _atom_site_occupancy
  _atom_site_site_symmetry_order
  _atom_site_calc_flag
  _atom_site_refinement_flags_posn
  _atom_site_refinement_flags_adp
  _atom_site_refinement_flags_occupancy
  _atom_site_disorder_assembly
  _atom_site_disorder_group
 C1 C 1.3931(9) 1.2243(9) 0.3472(4) 0.0273(19) Uani 1 1 d . U . . .
 H1A H 1.3576 1.3119 0.3119 0.041 Uiso 1 1 calc GR . . . .
 H1B H 1.4969 1.1459 0.3262 0.041 Uiso 1 1 calc GR . . . .
 H1C H 1.4401 1.2712 0.3896 0.041 Uiso 1 1 calc GR . . . .
 C2 C 1.1410(10) 1.0618(9) 0.3155(4) 0.0226(17) Uani 1 1 d . U . . .
 C3 C 0.9634(9) 0.9796(8) 0.3433(4) 0.0173(16) Uani 1 1 d . U . . .
 C4 C 0.8907(9) 0.9982(9) 0.4157(4) 0.0212(17) Uani 1 1 d . U . . .
 H4 H 0.9501 1.0652 0.4465 0.025 Uiso 1 1 calc R . . . .
 C5 C 0.7297(9) 0.9165(8) 0.4416(4) 0.0214(17) Uani 1 1 d . U . . .
 H5 H 0.6828 0.9272 0.4901 0.026 Uiso 1 1 calc R . . . .
 C6 C 0.6386(9) 0.8195(9) 0.3959(4) 0.0212(16) Uani 1 1 d . U . . .
 C7 C 0.7062(10) 0.8036(9) 0.3229(4) 0.0228(17) Uani 1 1 d . U . . .
 H7 H 0.6433 0.7394 0.2919 0.027 Uiso 1 1 calc R . . . .
 C8 C 0.8691(10) 0.8848(9) 0.2967(4) 0.0240(17) Uani 1 1 d . U . . .
 H8 H 0.9147 0.8755 0.2480 0.029 Uiso 1 1 calc R . . . .
 C9 C 0.4686(10) 0.7374(9) 0.4241(4) 0.0231(17) Uani 1 1 d . U . . .
 C10 C 0.3334(10) 0.6663(9) 0.4479(4) 0.0222(17) Uani 1 1 d . U . . .
 C11 C 0.1639(10) 0.5822(9) 0.4738(4) 0.0205(16) Uani 1 1 d . U . . .
 C12 C 0.0427(9) 0.5213(9) 0.4252(4) 0.0203(17) Uani 1 1 d . U . . .
 H12 H 0.0689 0.5343 0.3751 0.024 Uiso 1 1 calc R . . . .
 C13 C 0.1180(10) 0.5589(9) 0.5484(4) 0.0232(17) Uani 1 1 d . U . . .
 F1 F 0.2354(5) 0.6166(5) 0.5973(2) 0.0287(11) Uani 1 1 d . U . . .
 O1 O 1.2191(6) 1.1398(6) 0.3679(3) 0.0252(12) Uani 1 1 d . U . . .
 O2 O 1.2078(7) 1.0560(6) 0.2526(3) 0.0282(13) Uani 1 1 d . U . . .
 C1A C 1.3556(9) 0.6984(9) 0.1619(4) 0.0290(19) Uani 1 1 d . U . . .
 H1AA H 1.4186 0.7546 0.1214 0.044 Uiso 1 1 calc GR . . . .
 H1AB H 1.4507 0.6137 0.1821 0.044 Uiso 1 1 calc GR . . . .
 H1AC H 1.3089 0.7776 0.1988 0.044 Uiso 1 1 calc GR . . . .
 C2A C 1.0897(10) 0.5302(9) 0.1864(4) 0.0209(17) Uani 1 1 d . U . . .
 C3A C 0.9207(9) 0.4567(8) 0.1551(4) 0.0190(16) Uani 1 1 d . U . . .
 C4A C 0.8724(9) 0.4898(8) 0.0831(4) 0.0205(16) Uani 1 1 d . U . . .
 H4A H 0.9424 0.5629 0.0542 0.025 Uiso 1 1 calc R . . . .
 C5A C 0.7206(9) 0.4148(8) 0.0539(4) 0.0211(17) Uani 1 1 d . U . . .
 H5A H 0.6893 0.4372 0.0055 0.025 Uiso 1 1 calc R . . . .
 C6A C 0.6146(10) 0.3054(9) 0.0973(4) 0.0205(16) Uani 1 1 d . U . . .
 C7A C 0.6620(10) 0.2738(9) 0.1700(4) 0.0238(17) Uani 1 1 d . U . . .
 H7A H 0.5917 0.2014 0.1993 0.029 Uiso 1 1 calc R . . . .
 C8A C 0.8142(10) 0.3502(8) 0.1989(4) 0.0234(17) Uani 1 1 d . U . . .
 H8A H 0.8446 0.3299 0.2476 0.028 Uiso 1 1 calc R . . . .
 C9A C 0.4564(10) 0.2277(9) 0.0669(4) 0.0221(17) Uani 1 1 d . U . . .
 C10A C 0.3268(11) 0.1596(9) 0.0437(4) 0.0248(17) Uani 1 1 d . U . . .
 C11A C 0.1635(9) 0.0790(8) 0.0204(4) 0.0213(16) Uani 1 1 d . U . . .
 C12A C -0.0340(9) -0.0127(8) -0.0738(4) 0.0187(16) Uani 1 1 d . U . . .
 H12A H -0.0549 -0.0210 -0.1233 0.022 Uiso 1 1 calc R . . . .
 C13A C 0.1236(10) 0.0643(8) -0.0519(4) 0.0212(17) Uani 1 1 d . U . . .
 F1A F 0.2469(5) 0.1265(5) -0.1045(2) 0.0289(11) Uani 1 1 d . U . . .
 O1A O 1.1859(6) 0.6211(6) 0.1368(3) 0.0269(13) Uani 1 1 d . U . . .
 O2A O 1.1345(7) 0.5131(6) 0.2495(3) 0.0311(13) Uani 1 1 d . U . . .

loop_
  _atom_site_aniso_label
  _atom_site_aniso_U_11
  _atom_site_aniso_U_22
  _atom_site_aniso_U_33
  _atom_site_aniso_U_23
  _atom_site_aniso_U_13
  _atom_site_aniso_U_12
 C1 0.015(4) 0.027(4) 0.040(5) 0.008(4) 0.007(3) -0.013(3)
 C2 0.021(4) 0.015(4) 0.032(4) 0.005(3) -0.002(3) -0.004(3)
 C3 0.017(3) 0.010(4) 0.024(4) 0.002(3) 0.002(3) -0.002(3)
 C4 0.017(3) 0.022(4) 0.025(4) 0.003(3) 0.001(3) -0.003(3)
 C5 0.017(4) 0.018(4) 0.029(4) 0.001(3) 0.001(3) -0.003(3)
 C6 0.014(3) 0.016(4) 0.032(4) 0.009(3) 0.002(3) -0.002(3)
 C7 0.022(4) 0.016(4) 0.032(4) 0.000(3) -0.003(3) -0.006(3)
 C8 0.022(4) 0.020(4) 0.029(4) 0.001(3) 0.001(3) -0.001(3)
 C9 0.018(4) 0.017(4) 0.033(5) 0.002(3) 0.003(3) -0.001(3)
 C10 0.020(4) 0.017(4) 0.030(4) 0.000(3) -0.001(3) -0.001(3)
 C11 0.017(3) 0.016(4) 0.028(4) 0.003(3) 0.005(3) -0.001(3)
 C12 0.016(3) 0.019(4) 0.026(4) 0.004(3) 0.007(3) -0.005(3)
 C13 0.017(4) 0.016(4) 0.037(4) -0.001(3) -0.002(3) -0.008(3)
 F1 0.025(2) 0.031(3) 0.033(2) -0.001(2) -0.0015(19) -0.012(2)
 O1 0.020(3) 0.027(3) 0.030(3) 0.001(2) 0.003(2) -0.011(2)
 O2 0.030(3) 0.026(3) 0.031(3) 0.002(2) 0.005(2) -0.014(3)
 C1A 0.016(4) 0.020(4) 0.052(5) -0.005(4) 0.001(3) -0.007(3)
 C2A 0.018(4) 0.014(4) 0.029(4) 0.000(3) 0.001(3) -0.001(3)
 C3A 0.014(3) 0.016(4) 0.026(4) 0.001(3) 0.001(3) -0.004(3)
 C4A 0.017(4) 0.011(4) 0.034(4) 0.001(3) 0.001(3) -0.004(3)
 C5A 0.016(4) 0.017(4) 0.030(4) 0.000(3) -0.002(3) -0.003(3)
 C6A 0.020(4) 0.012(4) 0.031(4) 0.000(3) -0.004(3) -0.006(3)
 C7A 0.021(4) 0.017(4) 0.034(4) 0.005(3) 0.004(3) -0.006(3)
 C8A 0.026(4) 0.015(4) 0.029(4) 0.006(3) -0.001(3) -0.007(3)
 C9A 0.018(4) 0.015(4) 0.033(4) 0.003(3) 0.002(3) -0.002(3)
 C10A 0.023(4) 0.016(4) 0.034(5) -0.001(3) 0.009(3) -0.004(3)
 C11A 0.016(3) 0.008(3) 0.041(4) 0.000(3) 0.001(3) -0.003(3)
 C12A 0.017(3) 0.014(4) 0.025(4) -0.003(3) 0.004(3) -0.005(3)
 C13A 0.022(4) 0.010(4) 0.031(4) 0.003(3) 0.008(3) -0.009(3)
 F1A 0.023(2) 0.029(3) 0.037(3) 0.001(2) 0.0075(19) -0.014(2)
 O1A 0.020(3) 0.026(3) 0.037(3) 0.000(3) -0.001(2) -0.014(2)
 O2A 0.027(3) 0.031(3) 0.035(3) 0.001(3) -0.003(2) -0.006(3)

_geom_special_details
;
 All esds (except the esd in the dihedral angle between two l.s. planes)
 are estimated using the full covariance matrix.  The cell esds are taken
 into account individually in the estimation of esds in distances, angles
 and torsion angles; correlations between esds in cell parameters are only
 used when they are defined by crystal symmetry.  An approximate (isotropic)
 treatment of cell esds is used for estimating esds involving l.s. planes.
;
loop_
  _geom_bond_atom_site_label_1
  _geom_bond_atom_site_label_2
  _geom_bond_distance
  _geom_bond_site_symmetry_2
  _geom_bond_publ_flag
 C1 H1A 0.9600 . ?
 C1 H1B 0.9600 . ?
 C1 H1C 0.9600 . ?
 C1 O1 1.447(7) . ?
 C2 C3 1.489(9) . ?
 C2 O1 1.328(8) . ?
 C2 O2 1.214(8) . ?
 C3 C4 1.394(9) . ?
 C3 C8 1.389(9) . ?
 C4 H4 0.9300 . ?
 C4 C5 1.385(8) . ?
 C5 H5 0.9300 . ?
 C5 C6 1.377(9) . ?
 C6 C7 1.394(9) . ?
 C6 C9 1.449(9) . ?
 C7 H7 0.9300 . ?
 C7 C8 1.395(9) . ?
 C8 H8 0.9300 . ?
 C9 C10 1.185(9) . ?
 C10 C11 1.442(9) . ?
 C11 C12 1.378(9) . ?
 C11 C13 1.396(9) . ?
 C12 H12 0.9300 . ?
 C12 C13 1.379(8) 2_566 ?
 C13 C12 1.379(8) 2_566 ?
 C13 F1 1.353(7) . ?
 C1A H1AA 0.9600 . ?
 C1A H1AB 0.9600 . ?
 C1A H1AC 0.9600 . ?
 C1A O1A 1.464(7) . ?
 C2A C3A 1.491(9) . ?
 C2A O1A 1.335(8) . ?
 C2A O2A 1.208(8) . ?
 C3A C4A 1.384(9) . ?
 C3A C8A 1.388(9) . ?
 C4A H4A 0.9300 . ?
 C4A C5A 1.385(8) . ?
 C5A H5A 0.9300 . ?
 C5A C6A 1.398(9) . ?
 C6A C7A 1.395(9) . ?
 C6A C9A 1.441(9) . ?
 C7A H7A 0.9300 . ?
 C7A C8A 1.391(9) . ?
 C8A H8A 0.9300 . ?
 C9A C10A 1.187(9) . ?
 C10A C11A 1.430(9) . ?
 C11A C12A 1.407(9) 2 ?
 C11A C13A 1.377(10) . ?
 C12A C11A 1.407(9) 2 ?
 C12A H12A 0.9300 . ?
 C12A C13A 1.373(9) . ?
 C13A F1A 1.357(7) . ?

loop_
  _geom_angle_atom_site_label_1
  _geom_angle_atom_site_label_2
  _geom_angle_atom_site_label_3
  _geom_angle
  _geom_angle_site_symmetry_1
  _geom_angle_site_symmetry_3
  _geom_angle_publ_flag
 H1A C1 H1B 109.5 . . ?
 H1A C1 H1C 109.5 . . ?
 H1B C1 H1C 109.5 . . ?
 O1 C1 H1A 109.5 . . ?
 O1 C1 H1B 109.5 . . ?
 O1 C1 H1C 109.5 . . ?
 O1 C2 C3 112.0(6) . . ?
 O2 C2 C3 123.8(7) . . ?
 O2 C2 O1 124.1(6) . . ?
 C4 C3 C2 120.3(6) . . ?
 C8 C3 C2 119.8(7) . . ?
 C8 C3 C4 119.9(6) . . ?
 C3 C4 H4 120.1 . . ?
 C5 C4 C3 119.8(6) . . ?
 C5 C4 H4 120.1 . . ?
 C4 C5 H5 119.8 . . ?
 C6 C5 C4 120.4(7) . . ?
 C6 C5 H5 119.8 . . ?
 C5 C6 C7 120.4(6) . . ?
 C5 C6 C9 119.3(7) . . ?
 C7 C6 C9 120.3(6) . . ?
 C6 C7 H7 120.3 . . ?
 C6 C7 C8 119.4(7) . . ?
 C8 C7 H7 120.3 . . ?
 C3 C8 C7 120.1(7) . . ?
 C3 C8 H8 120.0 . . ?
 C7 C8 H8 120.0 . . ?
 C10 C9 C6 178.0(8) . . ?
 C9 C10 C11 177.3(8) . . ?
 C12 C11 C10 120.7(6) . . ?
 C12 C11 C13 117.9(6) . . ?
 C13 C11 C10 121.4(6) . . ?
 C11 C12 H12 120.3 . . ?
 C11 C12 C13 119.4(6) . 2_566 ?
 C13 C12 H12 120.3 2_566 . ?
 C12 C13 C11 122.7(6) 2_566 . ?
 F1 C13 C11 119.1(6) . . ?
 F1 C13 C12 118.2(7) . 2_566 ?
 C2 O1 C1 116.9(5) . . ?
 H1AA C1A H1AB 109.5 . . ?
 H1AA C1A H1AC 109.5 . . ?
 H1AB C1A H1AC 109.5 . . ?
 O1A C1A H1AA 109.5 . . ?
 O1A C1A H1AB 109.5 . . ?
 O1A C1A H1AC 109.5 . . ?
 O1A C2A C3A 112.0(6) . . ?
 O2A C2A C3A 124.8(6) . . ?
 O2A C2A O1A 123.1(6) . . ?
 C4A C3A C2A 121.2(6) . . ?
 C4A C3A C8A 120.0(6) . . ?
 C8A C3A C2A 118.7(7) . . ?
 C3A C4A H4A 119.7 . . ?
 C3A C4A C5A 120.5(6) . . ?
 C5A C4A H4A 119.7 . . ?
 C4A C5A H5A 120.1 . . ?
 C4A C5A C6A 119.9(7) . . ?
 C6A C5A H5A 120.1 . . ?
 C5A C6A C9A 119.8(7) . . ?
 C7A C6A C5A 119.5(6) . . ?
 C7A C6A C9A 120.7(6) . . ?
 C6A C7A H7A 119.9 . . ?
 C8A C7A C6A 120.2(6) . . ?
 C8A C7A H7A 119.9 . . ?
 C3A C8A C7A 119.9(7) . . ?
 C3A C8A H8A 120.0 . . ?
 C7A C8A H8A 120.0 . . ?
 C10A C9A C6A 177.8(8) . . ?
 C9A C10A C11A 176.2(8) . . ?
 C12A C11A C10A 118.7(7) 2 . ?
 C13A C11A C10A 123.6(6) . . ?
 C13A C11A C12A 117.7(6) . 2 ?
 C11A C12A H12A 120.4 2 . ?
 C13A C12A C11A 119.1(6) . 2 ?
 C13A C12A H12A 120.4 . . ?
 C12A C13A C11A 123.2(6) . . ?
 F1A C13A C11A 118.8(6) . . ?
 F1A C13A C12A 118.0(6) . . ?
 C2A O1A C1A 116.4(6) . . ?

loop_
  _geom_torsion_atom_site_label_1
  _geom_torsion_atom_site_label_2
  _geom_torsion_atom_site_label_3
  _geom_torsion_atom_site_label_4
  _geom_torsion
  _geom_torsion_site_symmetry_1
  _geom_torsion_site_symmetry_2
  _geom_torsion_site_symmetry_3
  _geom_torsion_site_symmetry_4
  _geom_torsion_publ_flag
 C2 C3 C4 C5 -177.8(6) . . . . ?
 C2 C3 C8 C7 178.2(6) . . . . ?
 C3 C2 O1 C1 180.0(5) . . . . ?
 C3 C4 C5 C6 -1.2(10) . . . . ?
 C4 C3 C8 C7 -2.2(10) . . . . ?
 C4 C5 C6 C7 -0.6(11) . . . . ?
 C4 C5 C6 C9 -179.1(6) . . . . ?
 C5 C6 C7 C8 1.0(10) . . . . ?
 C6 C7 C8 C3 0.4(10) . . . . ?
 C8 C3 C4 C5 2.6(10) . . . . ?
 C9 C6 C7 C8 179.5(6) . . . . ?
 C10 C11 C12 C13 179.8(6) . . . 2_566 ?
 C10 C11 C13 C12 -179.8(6) . . . 2_566 ?
 C10 C11 C13 F1 0.0(11) . . . . ?
 C12 C11 C13 C12 -0.2(12) . . . 2_566 ?
 C12 C11 C13 F1 179.6(6) . . . . ?
 C13 C11 C12 C13 0.2(12) . . . 2_566 ?
 O1 C2 C3 C4 3.7(9) . . . . ?
 O1 C2 C3 C8 -176.6(6) . . . . ?
 O2 C2 C3 C4 -177.3(7) . . . . ?
 O2 C2 C3 C8 2.4(11) . . . . ?
 O2 C2 O1 C1 0.9(10) . . . . ?
 C2A C3A C4A C5A 177.2(6) . . . . ?
 C2A C3A C8A C7A -177.0(6) . . . . ?
 C3A C2A O1A C1A -179.7(5) . . . . ?
 C3A C4A C5A C6A 0.3(10) . . . . ?
 C4A C3A C8A C7A 1.5(11) . . . . ?
 C4A C5A C6A C7A 0.5(11) . . . . ?
 C4A C5A C6A C9A 179.9(6) . . . . ?
 C5A C6A C7A C8A -0.2(11) . . . . ?
 C6A C7A C8A C3A -0.7(11) . . . . ?
 C8A C3A C4A C5A -1.2(10) . . . . ?
 C9A C6A C7A C8A -179.7(7) . . . . ?
 C10A C11A C13A C12A -179.7(7) . . . . ?
 C10A C11A C13A F1A 1.2(11) . . . . ?
 C11A C12A C13A C11A 0.7(12) 2 . . . ?
 C11A C12A C13A F1A 179.7(6) 2 . . . ?
 C12A C11A C13A C12A -0.7(12) 2 . . . ?
 C12A C11A C13A F1A -179.7(6) 2 . . . ?
 O1A C2A C3A C4A -2.4(9) . . . . ?
 O1A C2A C3A C8A 176.0(6) . . . . ?
 O2A C2A C3A C4A 176.4(7) . . . . ?
 O2A C2A C3A C8A -5.2(11) . . . . ?
 O2A C2A O1A C1A 1.5(10) . . . . ?

_shelx_res_file
;
    rjm_10_073_hklf5.res created by SHELXL-2014/7

TITL RJM_10_073a in P-1
CELL 0.71073 6.7307 8.0638 18.3127 88.0607 86.8465 83.4656
ZERR 2 0.0022 0.0028 0.0064 0.0096 0.0091 0.0091
LATT 1
SFAC C H F O
UNIT 52 32 4 8
RIGU

L.S. 20
PLAN  20
MORE -1
BOND $H
CONF
fmap 2 53
acta 52
REM <olex2.extras>
REM <HklSrc "%.\\RJM_10_073_hklf5.hkl">
REM </olex2.extras>

WGHT    0.102500    1.403500
BASF   0.27328
FVAR       0.11070
C1    1    1.393069    1.224311    0.347169    11.00000    0.01545    0.02664 =
         0.04047    0.00846    0.00722   -0.01270
AFIX 137
H1A   2    1.357633    1.311926    0.311870    11.00000   -1.50000
H1B   2    1.496893    1.145905    0.326221    11.00000   -1.50000
H1C   2    1.440053    1.271154    0.389635    11.00000   -1.50000
AFIX   0
C2    1    1.140991    1.061807    0.315547    11.00000    0.02124    0.01497 =
         0.03188    0.00550   -0.00226   -0.00413
C3    1    0.963355    0.979647    0.343318    11.00000    0.01732    0.00996 =
         0.02422    0.00233    0.00204   -0.00150
C4    1    0.890684    0.998186    0.415687    11.00000    0.01677    0.02168 =
         0.02466    0.00326    0.00138   -0.00297
AFIX  43
H4    2    0.950131    1.065213    0.446480    11.00000   -1.20000
AFIX   0
C5    1    0.729725    0.916503    0.441576    11.00000    0.01710    0.01825 =
         0.02869    0.00064    0.00057   -0.00256
AFIX  43
H5    2    0.682833    0.927204    0.490103    11.00000   -1.20000
AFIX   0
C6    1    0.638621    0.819495    0.395911    11.00000    0.01449    0.01591 =
         0.03219    0.00920    0.00191   -0.00221
C7    1    0.706228    0.803586    0.322891    11.00000    0.02179    0.01594 =
         0.03172   -0.00010   -0.00296   -0.00557
AFIX  43
H7    2    0.643313    0.739421    0.291918    11.00000   -1.20000
AFIX   0
C8    1    0.869117    0.884810    0.296722    11.00000    0.02179    0.02024 =
         0.02919    0.00140    0.00125   -0.00123
AFIX  43
H8    2    0.914707    0.875463    0.248006    11.00000   -1.20000
AFIX   0
C9    1    0.468576    0.737354    0.424070    11.00000    0.01819    0.01695 =
         0.03326    0.00198    0.00262   -0.00054
C10   1    0.333382    0.666266    0.447893    11.00000    0.01965    0.01700 =
         0.02979   -0.00011   -0.00111   -0.00097
C11   1    0.163910    0.582193    0.473798    11.00000    0.01657    0.01573 =
         0.02806    0.00288    0.00487   -0.00124
C12   1    0.042653    0.521325    0.425210    11.00000    0.01567    0.01863 =
         0.02600    0.00437    0.00723   -0.00501
AFIX  43
H12   2    0.068928    0.534266    0.375076    11.00000   -1.20000
AFIX   0
C13   1    0.117970    0.558936    0.548424    11.00000    0.01748    0.01636 =
         0.03725   -0.00059   -0.00221   -0.00775
F1    3    0.235358    0.616641    0.597277    11.00000    0.02500    0.03051 =
         0.03260   -0.00103   -0.00146   -0.01160
O1    4    1.219144    1.139811    0.367943    11.00000    0.01974    0.02711 =
         0.03020    0.00058    0.00337   -0.01095
O2    4    1.207822    1.055961    0.252619    11.00000    0.02953    0.02603 =
         0.03074    0.00162    0.00512   -0.01431

C1A   1    1.355623    0.698407    0.161942    11.00000    0.01647    0.02004 =
         0.05170   -0.00473    0.00103   -0.00742
AFIX 137
H1AA  2    1.418561    0.754559    0.121414    11.00000   -1.50000
H1AB  2    1.450657    0.613721    0.182124    11.00000   -1.50000
H1AC  2    1.308914    0.777590    0.198773    11.00000   -1.50000
AFIX   0
C2A   1    1.089748    0.530165    0.186446    11.00000    0.01843    0.01446 =
         0.02936   -0.00018    0.00077   -0.00138
C3A   1    0.920672    0.456711    0.155079    11.00000    0.01431    0.01644 =
         0.02648    0.00066    0.00147   -0.00436
C4A   1    0.872374    0.489768    0.083138    11.00000    0.01737    0.01062 =
         0.03383    0.00140    0.00072   -0.00434
AFIX  43
H4A   2    0.942371    0.562890    0.054210    11.00000   -1.20000
AFIX   0
C5A   1    0.720615    0.414792    0.053903    11.00000    0.01595    0.01712 =
         0.03047    0.00040   -0.00208   -0.00308
AFIX  43
H5A   2    0.689333    0.437187    0.005463    11.00000   -1.20000
AFIX   0
C6A   1    0.614568    0.305412    0.097336    11.00000    0.01962    0.01241 =
         0.03094   -0.00042   -0.00449   -0.00628
C7A   1    0.661996    0.273791    0.170044    11.00000    0.02103    0.01657 =
         0.03365    0.00522    0.00372   -0.00578
AFIX  43
H7A   2    0.591668    0.201439    0.199278    11.00000   -1.20000
AFIX   0
C8A   1    0.814193    0.350177    0.198943    11.00000    0.02615    0.01504 =
         0.02947    0.00602   -0.00124   -0.00662
AFIX  43
H8A   2    0.844592    0.329909    0.247593    11.00000   -1.20000
AFIX   0
C9A   1    0.456443    0.227702    0.066908    11.00000    0.01848    0.01451 =
         0.03267    0.00293    0.00193   -0.00186
C10A  1    0.326805    0.159583    0.043695    11.00000    0.02340    0.01643 =
         0.03377   -0.00142    0.00855   -0.00369
C11A  1    0.163533    0.078988    0.020352    11.00000    0.01605    0.00752 =
         0.04053    0.00017    0.00088   -0.00294
C12A  1   -0.034026   -0.012733   -0.073787    11.00000    0.01714    0.01444 =
         0.02483   -0.00303    0.00363   -0.00454
AFIX  43
H12A  2   -0.054904   -0.020998   -0.123251    11.00000   -1.20000
AFIX   0
C13A  1    0.123587    0.064285   -0.051919    11.00000    0.02247    0.00988 =
         0.03150    0.00262    0.00753   -0.00855
F1A   3    0.246860    0.126480   -0.104513    11.00000    0.02260    0.02851 =
         0.03700    0.00107    0.00754   -0.01381
O1A   4    1.185894    0.621143    0.136791    11.00000    0.02032    0.02611 =
         0.03702    0.00017   -0.00142   -0.01441
O2A   4    1.134482    0.513077    0.249473    11.00000    0.02744    0.03111 =
         0.03514    0.00145   -0.00289   -0.00562
HKLF 5

REM  RJM_10_073a in P-1
REM R1 =  0.0923 for    8625 Fo > 4sig(Fo)  and  0.1630 for all   15546 data
REM    292 parameters refined using    216 restraints

END

WGHT      0.1025      1.4035

REM Highest difference peak  0.504,  deepest hole -0.476,  1-sigma level  0.097
Q1    1   0.9428  0.4462  0.2137  11.00000  0.05    0.50
Q2    1   1.0479  0.9873  0.2426  11.00000  0.05    0.42
Q3    1   0.7052  0.8850  0.5228  11.00000  0.05    0.39
Q4    1   1.0988  0.5307  0.0165  11.00000  0.05    0.39
Q5    1   0.4557  0.2393 -0.0043  11.00000  0.05    0.39
Q6    1   1.2046  1.0239  0.1963  11.00000  0.05    0.39
Q7    1   1.2018  1.0512  0.1804  11.00000  0.05    0.38
Q8    1   0.3905  0.6215  0.3371  11.00000  0.05    0.36
Q9    1   0.0252  0.6368  0.3803  11.00000  0.05    0.35
Q10   1   0.3678  0.7254  0.5559  11.00000  0.05    0.34
Q11   1   1.4273  0.8076  0.1040  11.00000  0.05    0.34
Q12   1   1.3931  0.7058  0.2227  11.00000  0.05    0.34
Q13   1   1.4155  0.6749  0.0595  11.00000  0.05    0.33
Q14   1   0.2903  0.1301 -0.1844  11.00000  0.05    0.33
Q15   1   1.0600  0.5444  0.1180  11.00000  0.05    0.33
Q16   1   0.7490  0.3962  0.3019  11.00000  0.05    0.32
Q17   1   0.4125  0.6424  0.3239  11.00000  0.05    0.32
Q18   1   0.2543  0.1679 -0.0273  11.00000  0.05    0.32
Q19   1   0.1236  0.0981  0.0037  11.00000  0.05    0.32
Q20   1   0.1687  0.4941  0.6424  11.00000  0.05    0.32
;
_shelx_res_checksum               77324
_shelx_hkl_file
;
  -1   0   0   28.04    2.17   1
  -1   0   0   28.95    2.17   1
  -1   0   0   29.54    2.17   1
  -1   0   0   26.97    2.17   1
  -1   0   0   27.99    2.17   1
   1   0   0   28.58    2.17   1
   1   0   0   27.32    2.17   1
   1   0   0   29.00    2.17   1
   1   0   0   29.57    2.17   1
   1   0   0   27.90    2.17   1
   1   0   0   28.71    2.17   1
  -2   0   0   31.11    2.35   1
  -2   0   0   29.97    2.35   1
  -2   0   0   31.58    2.35   1
  -2   0   0   31.40    2.35   1
   2   0   0   29.73    2.34   1
   2   0   0   30.42    2.35   1
   2   0   0   30.70    2.35   1
   2   0   0   30.53    2.35   1
   2   0   0   31.60    2.35   1
   2   0   0   29.39    2.34   1
  -3   0   0    4.31    0.45   1
  -3   0   0    4.40    0.43   1
  -3   0   0    4.67    0.45   1
   3   0   0    4.66    0.43   1
   3   0   0    4.97    0.44   1
   3   0   0    4.71    0.42   1
   3   0   0    4.76    0.42   1
   3   0   0    4.59    0.41   1
   4   0   1    4.35    0.42  -2
  -4   0   0    4.35    0.42   1
   4   0   1    3.74    0.40  -2
  -4   0   0    3.74    0.40   1
   4   0   1    4.60    0.41  -2
  -4   0   0    4.60    0.41   1
  -4   0  -1    3.92    0.37  -2
   4   0   0    3.92    0.37   1
  -4   0  -1    3.83    0.40  -2
   4   0   0    3.83    0.40   1
  -4   0  -1    4.08    0.38  -2
   4   0   0    4.08    0.38   1
  -4   0  -1    3.77    0.38  -2
   4   0   0    3.77    0.38   1
  -5   0   0   -0.31    0.19   1
  -5   0   0    0.22    0.22   1
   5   0   0    0.00    0.15   1
   5   0   0    0.05    0.16   1
   5   0   0    0.24    0.13   1
  -6   0   0    0.21    0.24   1
  -6   0   0    0.03    0.22   1
   6   0   0    0.26    0.14   1
   6   0   0   -0.06    0.16   1
   7   0   2   -0.18    0.23  -2
  -7   0   0   -0.18    0.23   1
   7   0   2   -0.08    0.28  -2
  -7   0   0   -0.08    0.28   1
  -7   0  -2    0.16    0.20  -2
   7   0   0    0.16    0.20   1
   8   0   0    0.05    0.19   1
  -7   1  -2    0.09    0.19  -2
   7  -1   0    0.09    0.19   1
  -7   1  -2    0.16    0.17  -2
   7  -1   0    0.16    0.17   1
   7  -1   2    0.16    0.30  -2
  -7   1   0    0.16    0.30   1
   7  -1   2    0.01    0.25  -2
  -7   1   0    0.01    0.25   1
   6  -1   0    0.38    0.17   1
   6  -1   0    0.28    0.17   1
  -6   1   0    0.28    0.29   1
  -6   1   0    0.16    0.24   1
   5  -1   0    2.34    0.27   1
   5  -1   0    2.34    0.28   1
   5  -1   0    2.25    0.33   1
  -5   1   0    2.81    0.37   1
  -5   1   0    3.10    0.35   1
  -4   1  -1    2.74    0.33  -2
   4  -1   0    2.74    0.33   1
  -4   1  -1    3.20    0.31  -2
   4  -1   0    3.20    0.31   1
  -4   1  -1    2.79    0.32  -2
   4  -1   0    2.79    0.32   1
   4  -1   1    3.21    0.36  -2
  -4   1   0    3.21    0.36   1
   4  -1   1    3.11    0.34  -2
  -4   1   0    3.11    0.34   1
   3  -1   0    0.01    0.14   1
   3  -1   0   -0.07    0.17   1
   3  -1   0   -0.14    0.14   1
   3  -1   0    0.03    0.14   1
   3  -1   0   -0.02    0.15   1
   3  -1   0   -0.10    0.17   1
  -3   1   0   -0.17    0.19   1
  -3   1   0    0.08    0.18   1
   2  -1   0   -0.04    0.13   1
   2  -1   0    0.43    0.11   1
   2  -1   0    0.36    0.14   1
  -2   1   0    0.30    0.16   1
  -2   1   0    0.35    0.13   1
   1  -1   0    0.06    0.10   1
   1  -1   0    0.10    0.09   1
   1  -1   0   -0.02    0.11   1
  -1   1   0    0.12    0.11   1
  -1   1   0   -0.06    0.09   1
  -1   1   0    0.02    0.12   1
   0   1   0   -0.03    0.06  -2
   0  -1   0   -0.03    0.06   1
   0   1   0   -0.01    0.06  -2
   0  -1   0   -0.01    0.06   1
   0   1   0   -0.07    0.05  -2
   0  -1   0   -0.07    0.05   1
   0  -1   0    0.00    0.07  -2
   0   1   0    0.00    0.07   1
   0  -1   0    0.02    0.05  -2
   0   1   0    0.02    0.05   1
   0  -1   0   -0.02    0.07  -2
   0   1   0   -0.02    0.07   1
  -1  -1   0    0.86    0.13   1
  -1  -1   0    0.87    0.13   1
  -1  -1   0    0.86    0.11   1
   1   1   0    0.82    0.13   1
   1   1   0    0.83    0.12   1
   1   1   0    0.90    0.11   1
   1   1   0    0.76    0.10   1
   1   1   0    0.98    0.11   1
  -2  -1   0    0.92    0.15   1
  -2  -1   0    0.28    0.15   1
  -2  -1   0    0.53    0.15   1
  -2  -1   0    0.65    0.13   1
  -2  -1   0    0.58    0.11   1
   2   1   0    0.83    0.13   1
   2   1   0    0.57    0.12   1
   2   1   0    0.65    0.13   1
   2   1   0    0.71    0.14   1
   2   1   0    0.54    0.13   1
   2   1   0    0.64    0.11   1
   3   1   1    5.92    0.51  -2
  -3  -1   0    5.92    0.51   1
   3   1   1    5.88    0.50  -2
  -3  -1   0    5.88    0.50   1
   3   1   1    5.63    0.51  -2
  -3  -1   0    5.63    0.51   1
   3   1   1    5.50    0.51  -2
  -3  -1   0    5.50    0.51   1
  -3  -1  -1    5.63    0.50  -2
   3   1   0    5.63    0.50   1
  -3  -1  -1    6.11    0.49  -2
   3   1   0    6.11    0.49   1
  -3  -1  -1    5.79    0.50  -2
   3   1   0    5.79    0.50   1
  -3  -1  -1    5.80    0.50  -2
   3   1   0    5.80    0.50   1
  -3  -1  -1    5.22    0.51  -2
   3   1   0    5.22    0.51   1
  -3  -1  -1    5.37    0.49  -2
   3   1   0    5.37    0.49   1
  -4  -1   0    3.58    0.39   1
  -4  -1   0    3.55    0.38   1
  -4  -1   0    3.92    0.40   1
  -4  -1   0    4.06    0.38   1
   4   1   0    3.05    0.35   1
   4   1   0    3.13    0.36   1
   4   1   0    3.64    0.36   1
   4   1   0    3.87    0.37   1
  -5  -1   0    0.23    0.20   1
  -5  -1   0   -0.14    0.20   1
  -5  -1   0   -0.08    0.20   1
   5   1   0    0.22    0.17   1
   5   1   0    0.20    0.16   1
  -6  -1   0    0.55    0.26   1
  -6  -1   0    0.81    0.24   1
  -6  -1   0    0.55    0.22   1
   6   1   0    0.38    0.21   1
   6   1   0    0.33    0.19   1
   7   1   2    1.95    0.31  -2
  -7  -1   0    1.95    0.31   1
   7   1   2    1.79    0.31  -2
  -7  -1   0    1.79    0.31   1
  -7  -1  -2    1.10    0.27  -2
   7   1   0    1.10    0.27   1
  -7  -1  -2    1.95    0.29  -2
   7   1   0    1.95    0.29   1
  -8  -1   0    0.13    0.27   1
   8   1   0    0.04    0.20   1
   7  -2   0    0.66    0.24   1
   7  -2   0    0.26    0.25   1
  -7   2   0    0.82    0.33   1
  -7   2   0    0.41    0.36   1
   6  -2   0    0.50    0.21   1
   6  -2   0    0.10    0.21   1
  -6   2   0    0.52    0.31   1
  -6   2   0    0.71    0.29   1
   5  -2   0    2.13    0.30   1
  -5   2   0    2.63    0.35   1
  -5   2   0    2.91    0.38   1
  -4   2  -1    2.02    0.26  -2
   4  -2   0    2.02    0.26   1
   4  -2   1    1.83    0.28  -2
  -4   2   0    1.83    0.28   1
   4  -2   1    2.06    0.31  -2
  -4   2   0    2.06    0.31   1
   3  -2   0   16.36    1.42   1
   3  -2   0   19.57    1.42   1
  -3   2   0   19.39    1.41   1
  -3   2   0   16.68    1.43   1
   2  -2   0   13.15    1.05   1
   2  -2   0   13.24    1.05   1
   2  -2   0   13.23    1.05   1
  -2   2   0   13.00    1.06   1
  -2   2   0   13.47    1.04   1
  -2   2   0   13.01    1.05   1
  -1   2   0  963.98   73.54  -2
   1  -2   0  963.98   73.54   1
  -1   2   0  953.98   73.54  -2
   1  -2   0  953.98   73.54   1
  -1   2   0 1000.00   73.54  -2
   1  -2   0 1000.00   73.54   1
   1  -2   0  961.34   73.54  -2
  -1   2   0  961.34   73.54   1
   1  -2   0  959.32   73.54  -2
  -1   2   0  959.32   73.54   1
   0  -2   0   19.31    1.47   1
   0  -2   0   19.22    1.45   1
   0  -2   0   19.58    1.46   1
   0   2   0   20.20    1.45   1
   0   2   0   17.72    1.45   1
   0   2   0   17.22    1.46   1
  -1  -2   0    8.12    0.63   1
  -1  -2   0    7.59    0.61   1
  -1  -2   0    7.92    0.63   1
  -1  -2   0    7.87    0.63   1
   1   2   0    7.70    0.62   1
   1   2   0    7.60    0.62   1
   1   2   0    7.42    0.63   1
   1   2   0    7.93    0.63   1
  -2  -2   0    5.63    0.49   1
  -2  -2   0    6.12    0.51   1
  -2  -2   0    6.38    0.51   1
   2   2   0    5.70    0.48   1
   2   2   0    5.20    0.50   1
   2   2   0    6.42    0.49   1
   2   2   0    5.65    0.49   1
   2   2   0    6.38    0.51   1
   3   2   1    2.54    0.26  -2
  -3  -2   0    2.54    0.26   1
   3   2   1    2.62    0.30  -2
  -3  -2   0    2.62    0.30   1
   3   2   1    2.89    0.30  -2
  -3  -2   0    2.89    0.30   1
   3   2   1    2.80    0.28  -2
  -3  -2   0    2.80    0.28   1
  -3  -2  -1    2.39    0.27  -2
   3   2   0    2.39    0.27   1
  -3  -2  -1    2.63    0.30  -2
   3   2   0    2.63    0.30   1
  -3  -2  -1    2.34    0.26  -2
   3   2   0    2.34    0.26   1
  -3  -2  -1    2.34    0.29  -2
   3   2   0    2.34    0.29   1
  -3  -2  -1    2.77    0.30  -2
   3   2   0    2.77    0.30   1
  -3  -2  -1    2.41    0.27  -2
   3   2   0    2.41    0.27   1
  -4  -2   0    0.25    0.16   1
  -4  -2   0    0.38    0.15   1
  -4  -2   0    0.26    0.18   1
  -4  -2   0    0.24    0.18   1
   4   2   0    0.33    0.14   1
   4   2   0    0.18    0.18   1
   4   2   0    0.29    0.15   1
  -5  -2   0    0.91    0.24   1
  -5  -2   0    0.63    0.19   1
  -5  -2   0    0.59    0.21   1
  -5  -2   0    0.72    0.23   1
   5   2   0    0.69    0.21   1
   5   2   0    0.73    0.20   1
   6   2   2    1.24    0.25  -2
  -6  -2   0    1.24    0.25   1
   6   2   2    1.47    0.29  -2
  -6  -2   0    1.47    0.29   1
   6   2   2    1.19    0.25  -2
  -6  -2   0    1.19    0.25   1
  -6  -2  -2    1.46    0.27  -2
   6   2   0    1.46    0.27   1
  -6  -2  -2    1.33    0.28  -2
   6   2   0    1.33    0.28   1
  -7  -2   0    1.18    0.28   1
  -7  -2   0    1.14    0.32   1
   7   2   0    1.15    0.28   1
   7   2   0    1.39    0.28   1
   8   2   0    0.32    0.24   1
   7  -3   0   -0.01    0.26   1
   7  -3   0   -0.04    0.27   1
  -7   3   0    0.30    0.40   1
  -7   3   0   -0.14    0.34   1
   6  -3   0    0.90    0.26   1
  -6   3   0    0.87    0.33   1
  -6   3   0    1.19    0.39   1
  -5   3  -1    0.53    0.23  -2
   5  -3   0    0.53    0.23   1
   5  -3   1    0.90    0.31  -2
  -5   3   0    0.90    0.31   1
   5  -3   1    0.64    0.27  -2
  -5   3   0    0.64    0.27   1
   4  -3   0   -0.04    0.19   1
   4  -3   0    0.16    0.17   1
  -4   3   0   -0.17    0.25   1
  -4   3   0    0.18    0.22   1
   3  -3   0   -0.17    0.18   1
   3  -3   0   -0.14    0.15   1
   3  -3   0    0.17    0.17   1
  -3   3   0    0.22    0.21   1
  -3   3   0    0.00    0.18   1
   2  -3   0   -0.09    0.15   1
   2  -3   0    0.09    0.18   1
   2  -3   0   -0.21    0.16   1
  -2   3   0   -0.05    0.18   1
  -2   3   0    0.05    0.16   1
  -2   3   0   -0.10    0.19   1
  -1   3   0    0.24    0.16  -2
   1  -3   0    0.24    0.16   1
  -1   3   0    0.40    0.15  -2
   1  -3   0    0.40    0.15   1
  -1   3   0    0.11    0.15  -2
   1  -3   0    0.11    0.15   1
  -1   3   0    0.14    0.15  -2
   1  -3   0    0.14    0.15   1
   1  -3   0    0.01    0.16  -2
  -1   3   0    0.01    0.16   1
   1  -3   0    0.06    0.13  -2
  -1   3   0    0.06    0.13   1
   1  -3   0    0.27    0.18  -2
  -1   3   0    0.27    0.18   1
   0  -3   0    0.65    0.17   1
   0  -3   0    0.85    0.15   1
   0  -3   0    0.74    0.14   1
   0  -3   0    0.62    0.15   1
   0   3   0    0.62    0.17   1
   0   3   0    0.88    0.16   1
  -1  -3   0    1.64    0.20   1
  -1  -3   0    1.66    0.22   1
  -1  -3   0    1.71    0.18   1
  -1  -3   0    2.13    0.22   1
  -1  -3   0    1.64    0.18   1
   1   3   0    1.70    0.20   1
   1   3   0    1.49    0.20   1
   1   3   0    1.15    0.22   1
   2   3   1    2.19    0.26  -2
  -2  -3   0    2.19    0.26   1
   2   3   1    2.59    0.28  -2
  -2  -3   0    2.59    0.28   1
   2   3   1    2.56    0.26  -2
  -2  -3   0    2.56    0.26   1
   2   3   1    2.56    0.25  -2
  -2  -3   0    2.56    0.25   1
   2   3   1    1.98    0.24  -2
  -2  -3   0    1.98    0.24   1
  -2  -3  -1    2.77    0.27  -2
   2   3   0    2.77    0.27   1
  -2  -3  -1    2.65    0.28  -2
   2   3   0    2.65    0.28   1
  -2  -3  -1    1.66    0.25  -2
   2   3   0    1.66    0.25   1
  -3  -3   0    1.61    0.24   1
  -3  -3   0    1.68    0.22   1
   3   3   0    1.39    0.18   1
   3   3   0    1.34    0.23   1
   3   3   0    1.35    0.20   1
  -4  -3   0    0.07    0.19   1
  -4  -3   0    0.35    0.19   1
   4   3   0    0.49    0.15   1
   4   3   0    0.15    0.19   1
   4   3   0    0.24    0.14   1
  -5  -3   0    6.99    0.64   1
  -5  -3   0    7.35    0.64   1
   5   3   0    7.37    0.65   1
   5   3   0    5.71    0.60   1
   6   3   2    2.65    0.37  -2
  -6  -3   0    2.65    0.37   1
   6   3   2    2.10    0.35  -2
  -6  -3   0    2.10    0.35   1
  -6  -3  -2    2.02    0.31  -2
   6   3   0    2.02    0.31   1
  -6  -3  -2    2.98    0.37  -2
   6   3   0    2.98    0.37   1
  -7  -3   0    0.54    0.31   1
   7   3   0    0.10    0.20   1
   7   3   0   -0.09    0.26   1
   6  -4   0    0.57    0.29   1
  -6   4   0    1.53    0.36   1
  -6   4   0    0.71    0.39   1
  -5   4  -1    0.16    0.26  -2
   5  -4   0    0.16    0.26   1
   5  -4   1    0.00    0.32  -2
  -5   4   0    0.00    0.32   1
   5  -4   1   -0.01    0.27  -2
  -5   4   0   -0.01    0.27   1
   4  -4   0    3.47    0.40   1
   4  -4   0    4.08    0.43   1
  -4   4   0    4.02    0.48   1
  -4   4   0    4.15    0.42   1
   3  -4   0    2.68    0.32   1
   3  -4   0    2.18    0.29   1
  -3   4   0    2.61    0.29   1
  -3   4   0    2.46    0.35   1
  -2   4   0  141.78   11.38  -2
   2  -4   0  141.78   11.38   1
  -2   4   0  151.22   11.38  -2
   2  -4   0  151.22   11.38   1
   2  -4   0  149.41   11.37  -2
  -2   4   0  149.41   11.37   1
   2  -4   0  154.87   11.39  -2
  -2   4   0  154.87   11.39   1
   1  -4   0    5.17    0.48   1
   1  -4   0    6.36    0.50   1
   1  -4   0    5.04    0.47   1
  -1   4   0    5.19    0.50   1
  -1   4   0    4.95    0.49   1
  -1   4   0    4.24    0.46   1
   0  -4   0    0.20    0.15   1
   0  -4   0    0.11    0.15   1
   0  -4   0   -0.07    0.16   1
   0  -4   0    0.02    0.15   1
   0   4   0   -0.35    0.17   1
   0   4   0    0.03    0.17   1
   0   4   0   -0.04    0.15   1
  -1  -4   0    1.97    0.22   1
  -1  -4   0    1.41    0.18   1
  -1  -4   0    1.85    0.20   1
  -1  -4   0    1.15    0.21   1
  -1  -4   0    0.92    0.21   1
  -1  -4   0    1.40    0.21   1
   1   4   0    0.81    0.19   1
   1   4   0    0.95    0.22   1
   2   4   1   -0.01    0.14  -2
  -2  -4   0   -0.01    0.14   1
   2   4   1   -0.41    0.14  -2
  -2  -4   0   -0.41    0.14   1
   2   4   1   -0.01    0.16  -2
  -2  -4   0   -0.01    0.16   1
   2   4   1    0.04    0.11  -2
  -2  -4   0    0.04    0.11   1
   2   4   1    0.11    0.16  -2
  -2  -4   0    0.11    0.16   1
  -2  -4  -1   -0.01    0.16  -2
   2   4   0   -0.01    0.16   1
  -3  -4   0    2.22    0.25   1
  -3  -4   0    2.36    0.29   1
  -3  -4   0    1.93    0.24   1
  -3  -4   0    1.63    0.25   1
   3   4   0    1.47    0.22   1
  -4  -4   0    4.30    0.44   1
  -4  -4   0    4.00    0.46   1
   4   4   0    3.98    0.47   1
   5   4   2    4.44    0.52  -2
  -5  -4   0    4.44    0.52   1
   5   4   2    4.57    0.52  -2
  -5  -4   0    4.57    0.52   1
  -5  -4  -2    5.80    0.56  -2
   5   4   0    5.80    0.56   1
  -6  -4   0    1.40    0.33   1
  -6  -4   0    1.26    0.29   1
   6   4   0    2.14    0.36   1
   6   4   0    1.27    0.25   1
  -7  -4   0    0.29    0.28   1
  -7  -4   0    0.11    0.30   1
   7   4   0    0.34    0.31   1
   7   4   0    0.10    0.21   1
  -6   5  -1   -0.10    0.32  -2
   6  -5   0   -0.10    0.32   1
   6  -5   1    0.21    0.36  -2
  -6   5   0    0.21    0.36   1
   6  -5   1    0.25    0.41  -2
  -6   5   0    0.25    0.41   1
   5  -5   0    0.23    0.27   1
   5  -5   0   -0.27    0.24   1
  -5   5   0   -0.08    0.36   1
  -5   5   0   -0.11    0.29   1
   4  -5   0   -0.30    0.24   1
   4  -5   0   -0.25    0.22   1
  -4   5   0    0.00    0.24   1
  -4   5   0   -0.42    0.31   1
   3  -5   0    0.17    0.19   1
   3  -5   0    0.00    0.22   1
  -3   5   0    0.42    0.20   1
  -3   5   0    0.15    0.25   1
  -2   5   0    0.53    0.20  -2
   2  -5   0    0.53    0.20   1
  -2   5   0    0.66    0.20  -2
   2  -5   0    0.66    0.20   1
   2  -5   0    0.20    0.17  -2
  -2   5   0    0.20    0.17   1
   2  -5   0    0.33    0.23  -2
  -2   5   0    0.33    0.23   1
   1  -5   0   -0.02    0.17   1
   1  -5   0    0.30    0.18   1
  -1   5   0    0.29    0.21   1
  -1   5   0    0.32    0.16   1
   0  -5   0    1.25    0.19   1
   0  -5   0    1.04    0.21   1
   0  -5   0    1.12    0.19   1
   0   5   0    0.81    0.20   1
   0   5   0    0.54    0.18   1
   1   5   1    0.38    0.18  -2
  -1  -5   0    0.38    0.18   1
   1   5   1    0.35    0.16  -2
  -1  -5   0    0.35    0.16   1
   1   5   1    0.52    0.18  -2
  -1  -5   0    0.52    0.18   1
   1   5   1    0.17    0.14  -2
  -1  -5   0    0.17    0.14   1
   1   5   1    0.42    0.14  -2
  -1  -5   0    0.42    0.14   1
  -1  -5  -1    0.00    0.15  -2
   1   5   0    0.00    0.15   1
  -2  -5   0    0.15    0.18   1
  -2  -5   0   -0.12    0.16   1
  -2  -5   0    0.09    0.13   1
  -2  -5   0    0.04    0.17   1
   2   5   0   -0.03    0.16   1
  -3  -5   0    1.08    0.22   1
  -3  -5   0    1.21    0.23   1
  -3  -5   0    1.45    0.25   1
   3   5   0    0.34    0.19   1
  -4  -5   0   15.19    1.24   1
  -4  -5   0   14.40    1.22   1
  -4  -5   0   15.30    1.19   1
   4   5   0   14.87    1.26   1
   5   5   2    2.35    0.35  -2
  -5  -5   0    2.35    0.35   1
   5   5   2    2.75    0.39  -2
  -5  -5   0    2.75    0.39   1
  -5  -5  -2    2.51    0.43  -2
   5   5   0    2.51    0.43   1
  -6  -5   0    0.62    0.27   1
  -6  -5   0    0.66    0.26   1
   6   5   0    0.64    0.33   1
  -7  -5   0    0.35    0.29   1
  -7  -5   0    0.30    0.28   1
   7   5   0    0.41    0.32   1
   5  -6   0    0.23    0.29   1
   5  -6   0   -0.22    0.26   1
  -5   6   0    0.56    0.32   1
  -5   6   0   -0.18    0.36   1
   4  -6   0    0.35    0.27   1
   4  -6   0    0.79    0.27   1
  -4   6   0    0.33    0.32   1
  -4   6   0    0.63    0.28   1
  -3   6   0   22.12    1.82  -2
   3  -6   0   22.12    1.82   1
  -3   6   0   23.05    1.83  -2
   3  -6   0   23.05    1.83   1
   3  -6   0   23.50    1.85  -2
  -3   6   0   23.50    1.85   1
   3  -6   0   22.74    1.80  -2
  -3   6   0   22.74    1.80   1
   2  -6   0    0.51    0.22   1
   2  -6   0    0.51    0.23   1
  -2   6   0    0.51    0.27   1
   1  -6   0    1.93    0.28   1
   1  -6   0    1.87    0.28   1
  -1   6   0    2.01    0.30   1
   0  -6   0    0.23    0.20   1
   0  -6   0    0.44    0.18   1
   0   6   0    0.27    0.19   1
   1   6   1    0.12    0.19  -2
  -1  -6   0    0.12    0.19   1
   1   6   1    0.05    0.18  -2
  -1  -6   0    0.05    0.18   1
   1   6   1    0.16    0.17  -2
  -1  -6   0    0.16    0.17   1
   1   6   1    0.19    0.20  -2
  -1  -6   0    0.19    0.20   1
  -2  -6   0    1.49    0.27   1
  -2  -6   0    1.14    0.25   1
  -2  -6   0    1.45    0.25   1
  -3  -6   0    3.47    0.42   1
  -3  -6   0    3.31    0.39   1
  -3  -6   0    3.34    0.40   1
   4   6   2    5.46    0.53  -2
  -4  -6   0    5.46    0.53   1
   4   6   2    5.81    0.59  -2
  -4  -6   0    5.81    0.59   1
   4   6   2    5.42    0.56  -2
  -4  -6   0    5.42    0.56   1
  -4  -6  -2    5.22    0.61  -2
   4   6   0    5.22    0.61   1
  -5  -6   0    1.45    0.31   1
  -5  -6   0    1.53    0.31   1
   5   6   0    1.03    0.36   1
  -6  -6   0   -0.01    0.30   1
  -6  -6   0    0.15    0.24   1
   6   6   0    0.57    0.38   1
   4  -7   0    0.42    0.30   1
   4  -7   0    0.54    0.36   1
  -4   7   0    0.64    0.31   1
  -4   7   0    0.00    0.35   1
  -3   7   0    0.95    0.32  -2
   3  -7   0    0.95    0.32   1
  -3   7   0    0.78    0.27  -2
   3  -7   0    0.78    0.27   1
   3  -7   0    0.74    0.26  -2
  -3   7   0    0.74    0.26   1
   3  -7   0    0.38    0.32  -2
  -3   7   0    0.38    0.32   1
   2  -7   0    0.59    0.26   1
   2  -7   0    0.61    0.26   1
  -2   7   0    0.09    0.26   1
  -2   7   0   -0.22    0.22   1
   1  -7   0    1.33    0.28   1
   1  -7   0    0.88    0.26   1
  -1   7   0    0.47    0.25   1
   0   7   1   -0.06    0.22  -2
   0  -7   0   -0.06    0.22   1
   0   7   1    0.21    0.20  -2
   0  -7   0    0.21    0.20   1
   0   7   1    0.25    0.20  -2
   0  -7   0    0.25    0.20   1
   0  -7  -1    0.26    0.22  -2
   0   7   0    0.26    0.22   1
  -1  -7   0    0.10    0.21   1
  -1  -7   0    0.09    0.23   1
  -1  -7   0    0.25    0.21   1
  -1  -7   0    0.36    0.23   1
  -2  -7   0    0.98    0.26   1
  -2  -7   0    1.09    0.25   1
  -2  -7   0    0.97    0.23   1
  -2  -7   0    0.77    0.24   1
  -3  -7   0   12.53    1.01   1
  -3  -7   0   10.94    1.00   1
  -3  -7   0   12.04    1.02   1
   4   7   2    1.83    0.34  -2
  -4  -7   0    1.83    0.34   1
   4   7   2    2.23    0.32  -2
  -4  -7   0    2.23    0.32   1
   4   7   2    2.03    0.37  -2
  -4  -7   0    2.03    0.37   1
  -4  -7  -2    1.72    0.40  -2
   4   7   0    1.72    0.40   1
  -5  -7   0    0.37    0.26   1
  -5  -7   0    0.32    0.28   1
   5   7   0    0.58    0.36   1
  -6  -7   0    0.66    0.33   1
  -6  -7   0    0.54    0.29   1
   6   7   0    0.99    0.40   1
   3  -8   0    0.06    0.32   1
   3  -8   0   -0.30    0.30   1
  -3   8   0    0.34    0.36   1
   2  -8   0    2.35    0.40   1
   2  -8   0    2.21    0.36   1
  -2   8   0    2.00    0.39   1
   1  -8   0    0.24    0.26   1
   1  -8   0    0.52    0.25   1
  -1   8   0    0.17    0.27   1
   0   8   1    0.28    0.26  -2
   0  -8   0    0.28    0.26   1
   0   8   1    0.33    0.23  -2
   0  -8   0    0.33    0.23   1
   0   8   1   -0.40    0.26  -2
   0  -8   0   -0.40    0.26   1
   0   8   1   -0.06    0.23  -2
   0  -8   0   -0.06    0.23   1
   0  -8  -1   -0.11    0.24  -2
   0   8   0   -0.11    0.24   1
  -1  -8   0    0.47    0.26   1
  -1  -8   0    0.22    0.25   1
  -1  -8   0    0.63    0.23   1
  -1  -8   0    0.44    0.25   1
  -2  -8   0    0.92    0.27   1
  -2  -8   0    0.96    0.24   1
  -2  -8   0    0.80    0.26   1
  -2  -8   0    1.44    0.28   1
   3   8   2    3.34    0.42  -2
  -3  -8   0    3.34    0.42   1
   3   8   2    2.92    0.41  -2
  -3  -8   0    2.92    0.41   1
   3   8   2    3.50    0.45  -2
  -3  -8   0    3.50    0.45   1
   4   8   2    0.68    0.28  -2
  -4  -8   0    0.68    0.28   1
   4   8   2    0.27    0.30  -2
  -4  -8   0    0.27    0.30   1
   4   8   2    0.75    0.27  -2
  -4  -8   0    0.75    0.27   1
  -4  -8  -2    0.25    0.37  -2
   4   8   0    0.25    0.37   1
  -5  -8   0    0.20    0.33   1
  -5  -8   0   -0.19    0.16   1
  -5  -8   0    0.53    0.29   1
   5   8   0    0.35    0.36   1
   2  -9   0    0.87    0.31   1
   2  -9   0    0.63    0.38   1
  -2   9   0    0.09    0.34   1
  -1   9   1    0.00    0.31  -2
   1  -9   0    0.00    0.31   1
  -1   9   1    0.37    0.29  -2
   1  -9   0    0.37    0.29   1
   1  -9  -1    0.34    0.30  -2
  -1   9   0    0.34    0.30   1
   0   9   1    0.25    0.25  -2
   0  -9   0    0.25    0.25   1
   0   9   1    0.08    0.14  -2
   0  -9   0    0.08    0.14   1
   0   9   1    0.16    0.27  -2
   0  -9   0    0.16    0.27   1
   0   9   1    0.32    0.28  -2
   0  -9   0    0.32    0.28   1
   0  -9  -1   -0.06    0.21  -2
   0   9   0   -0.06    0.21   1
  -1  -9   0    0.24    0.25   1
  -1  -9   0    0.71    0.28   1
  -1  -9   0    0.32    0.28   1
  -1  -9   0    0.81    0.29   1
  -2  -9   0    4.21    0.51   1
  -2  -9   0    5.74    0.58   1
  -2  -9   0    4.56    0.56   1
   3   9   2    0.93    0.34  -2
  -3  -9   0    0.93    0.34   1
   3   9   2    1.27    0.35  -2
  -3  -9   0    1.27    0.35   1
   3   9   2    1.00    0.33  -2
  -3  -9   0    1.00    0.33   1
  -3  -9  -2    1.03    0.38  -2
   3   9   0    1.03    0.38   1
  -3  -9  -3    0.52    0.43  -2
   3   9  -1    0.52    0.43   1
   3   9   3    0.82    0.31  -2
  -3  -9   1    0.82    0.31   1
   3   9   3    0.56    0.32  -2
  -3  -9   1    0.56    0.32   1
   3   9   3    0.32    0.33  -2
  -3  -9   1    0.32    0.33   1
   2   9  -1    0.23    0.36   1
  -2  -9   1    0.28    0.30   1
  -2  -9   1    0.56    0.27   1
  -2  -9   1    0.06    0.27   1
  -2  -9   1   -0.10    0.14   1
  -1  -9   1    2.21    0.37   1
  -1  -9   1    2.46    0.36   1
  -1  -9   1    2.22    0.36   1
  -1  -9   1    2.21    0.38   1
   0  -9  -2    0.20    0.18  -2
   0   9  -1    0.20    0.18   1
   0   9   2    0.28    0.27  -2
   0  -9   1    0.28    0.27   1
   0   9   2   -0.56    0.29  -2
   0  -9   1   -0.56    0.29   1
   0   9   2    0.11    0.22  -2
   0  -9   1    0.11    0.22   1
   0   9   2    0.09    0.18  -2
   0  -9   1    0.09    0.18   1
   1  -9  -2    0.21    0.31  -2
  -1   9  -1    0.21    0.31   1
  -1   9   2   -0.09    0.30  -2
   1  -9   1   -0.09    0.30   1
  -1   9   2    0.28    0.32  -2
   1  -9   1    0.28    0.32   1
  -2   9  -1    0.06    0.37   1
   5   8  -1    0.40    0.39   1
  -5  -8   1    0.01    0.28   1
  -5  -8   1    0.28    0.26   1
  -5  -8   1   -0.18    0.16   1
  -4  -8  -3    0.57    0.36  -2
   4   8  -1    0.57    0.36   1
   4   8   3    0.50    0.26  -2
  -4  -8   1    0.50    0.26   1
   4   8   3    0.54    0.29  -2
  -4  -8   1    0.54    0.29   1
   4   8   3    0.49    0.31  -2
  -4  -8   1    0.49    0.31   1
  -3  -8  -3    0.89    0.37  -2
   3   8  -1    0.89    0.37   1
   3   8   3    1.31    0.29  -2
  -3  -8   1    1.31    0.29   1
   3   8   3    1.55    0.31  -2
  -3  -8   1    1.55    0.31   1
   3   8   3    1.58    0.34  -2
  -3  -8   1    1.58    0.34   1
  -2  -8   1    3.72    0.45   1
  -2  -8   1    3.87    0.45   1
  -2  -8   1    4.26    0.48   1
  -2  -8   1    4.08    0.42   1
  -1  -8   1    0.12    0.25   1
  -1  -8   1    0.14    0.20   1
  -1  -8   1    0.12    0.26   1
  -1  -8   1    0.30    0.22   1
   0  -8  -2    0.01    0.23  -2
   0   8  -1    0.01    0.23   1
   0   8   2    0.28    0.24  -2
   0  -8   1    0.28    0.24   1
   0   8   2   -0.06    0.25  -2
   0  -8   1   -0.06    0.25   1
   0   8   2   -0.05    0.22  -2
   0  -8   1   -0.05    0.22   1
  -1   8  -1    0.22    0.26   1
   1  -8   1    0.36    0.26   1
   1  -8   1    0.61    0.27   1
  -2   8  -1   -0.05    0.31   1
   2  -8   1    0.07    0.26   1
   2  -8   1   -0.14    0.30   1
  -3   8  -1   -0.24    0.34   1
   3  -8   1   -0.07    0.32   1
   3  -8   1   -0.05    0.30   1
   6   7  -1   -0.43    0.35   1
  -6  -7   1   -0.11    0.28   1
  -6  -7   1    0.01    0.25   1
   5   7  -1    0.60    0.35   1
  -5  -7   1    0.71    0.24   1
  -5  -7   1    1.20    0.29   1
  -5  -7   1    1.60    0.37   1
  -4  -7  -3    0.01    0.32  -2
   4   7  -1    0.01    0.32   1
   4   7   3    0.02    0.25  -2
  -4  -7   1    0.02    0.25   1
   4   7   3    0.15    0.20  -2
  -4  -7   1    0.15    0.20   1
   4   7   3    0.37    0.24  -2
  -4  -7   1    0.37    0.24   1
   3   7  -1    0.49    0.30   1
  -3  -7   1    1.12    0.26   1
  -3  -7   1    0.43    0.24   1
  -3  -7   1    0.60    0.25   1
  -2  -7   1    1.83    0.32   1
  -2  -7   1    1.91    0.33   1
  -2  -7   1    2.25    0.33   1
  -1  -7   1    0.52    0.24   1
  -1  -7   1    0.58    0.22   1
  -1  -7   1    0.67    0.25   1
  -1  -7   1    1.05    0.23   1
   0  -7  -2    0.37    0.23  -2
   0   7  -1    0.37    0.23   1
   0   7   2    0.38    0.24  -2
   0  -7   1    0.38    0.24   1
   0   7   2    0.39    0.19  -2
   0  -7   1    0.39    0.19   1
   0   7   2    0.50    0.20  -2
   0  -7   1    0.50    0.20   1
  -1   7  -1   -0.33    0.25   1
   1  -7   1    0.89    0.25   1
   1  -7   1    0.85    0.25   1
  -2   7  -1    0.19    0.28   1
   2  -7   1    0.81    0.26   1
   2  -7   1    0.69    0.26   1
   3  -7  -1    5.14    0.50  -2
  -3   7  -1    5.14    0.50   1
   3  -7  -1    4.66    0.57  -2
  -3   7  -1    4.66    0.57   1
  -3   7   1    4.71    0.53  -2
   3  -7   1    4.71    0.53   1
  -3   7   1    4.75    0.53  -2
   3  -7   1    4.75    0.53   1
  -4   7  -1    2.31    0.39   1
  -4   7  -1    0.93    0.33   1
   4  -7   1    1.58    0.36   1
   4  -7   1    1.32    0.38   1
   6   6  -1    0.06    0.38   1
  -6  -6   1    0.15    0.27   1
  -6  -6   1    0.58    0.25   1
   5   6  -1    0.73    0.36   1
  -5  -6   1    0.97    0.30   1
  -5  -6   1    0.54    0.24   1
  -4  -6  -3    1.92    0.40  -2
   4   6  -1    1.92    0.40   1
   4   6   3    2.75    0.33  -2
  -4  -6   1    2.75    0.33   1
   4   6   3    2.75    0.40  -2
  -4  -6   1    2.75    0.40   1
   4   6   3    2.50    0.31  -2
  -4  -6   1    2.50    0.31   1
   3   6  -1    2.95    0.46   1
  -3  -6   1    4.00    0.42   1
  -3  -6   1    4.17    0.46   1
  -3  -6   1    4.11    0.44   1
  -2  -6   1    0.16    0.20   1
  -2  -6   1    0.05    0.17   1
  -2  -6   1    0.28    0.22   1
  -2  -6   1   -0.08    0.14   1
   1   6   2    0.19    0.19  -2
  -1  -6   1    0.19    0.19   1
   1   6   2   -0.09    0.17  -2
  -1  -6   1   -0.09    0.17   1
   1   6   2    0.06    0.17  -2
  -1  -6   1    0.06    0.17   1
   1   6   2    0.21    0.20  -2
  -1  -6   1    0.21    0.20   1
   0   6  -1    0.63    0.22   1
   0  -6   1    0.74    0.21   1
   0  -6   1    0.82    0.19   1
   0  -6   1    0.90    0.22   1
  -1   6  -1    0.23    0.22   1
  -1   6  -1    0.41    0.20   1
   1  -6   1   -0.08    0.20   1
   1  -6   1    0.11    0.20   1
  -2   6  -1    0.00    0.24   1
   2  -6   1    0.05    0.23   1
   2  -6   1    0.15    0.21   1
   3  -6  -1    0.87    0.23  -2
  -3   6  -1    0.87    0.23   1
   3  -6  -1    0.59    0.31  -2
  -3   6  -1    0.59    0.31   1
  -3   6   1    0.71    0.27  -2
   3  -6   1    0.71    0.27   1
  -3   6   1    0.65    0.23  -2
   3  -6   1    0.65    0.23   1
  -4   6  -1    0.68    0.35   1
  -4   6  -1    0.59    0.28   1
   4  -6   1    0.82    0.31   1
   4  -6   1    1.09    0.30   1
  -5   6  -1   -0.04    0.34   1
  -5   6  -1    0.14    0.37   1
   5  -6   1    0.37    0.30   1
   5  -6   1    0.20    0.31   1
   7   5  -1    0.21    0.34   1
  -7  -5   1    0.32    0.26   1
  -7  -5   1    0.39    0.32   1
   6   5  -1    0.02    0.31   1
  -6  -5   1    0.13    0.26   1
  -6  -5   1   -0.07    0.23   1
  -5  -5  -3   -0.08    0.28  -2
   5   5  -1   -0.08    0.28   1
   5   5   3    0.10    0.25  -2
  -5  -5   1    0.10    0.25   1
   5   5   3    0.06    0.22  -2
  -5  -5   1    0.06    0.22   1
   4   5  -1    3.38    0.48   1
  -4  -5   1    4.22    0.41   1
  -4  -5   1    4.75    0.49   1
  -4  -5   1    4.26    0.45   1
   3   5  -1    0.16    0.23   1
   3   5  -1    0.02    0.14   1
  -3  -5   1    0.22    0.19   1
  -3  -5   1    0.19    0.21   1
  -3  -5   1    0.09    0.16   1
  -2  -5   1    2.76    0.32   1
  -2  -5   1    2.56    0.31   1
  -2  -5   1    2.85    0.34   1
   1   5   2    3.42    0.34  -2
  -1  -5   1    3.42    0.34   1
   1   5   2    2.95    0.33  -2
  -1  -5   1    2.95    0.33   1
   1   5   2    2.58    0.29  -2
  -1  -5   1    2.58    0.29   1
   1   5   2    3.13    0.32  -2
  -1  -5   1    3.13    0.32   1
   1   5   2    2.35    0.31  -2
  -1  -5   1    2.35    0.31   1
   0   5  -1    0.50    0.17   1
   0  -5   1    0.04    0.18   1
   0  -5   1    0.00    0.18   1
   0  -5   1    0.54    0.15   1
  -1   5  -1    0.28    0.20   1
   1  -5   1    0.23    0.18   1
   1  -5   1    0.42    0.18   1
   2  -5  -1    5.75    0.56  -2
  -2   5  -1    5.75    0.56   1
   2  -5  -1    5.53    0.50  -2
  -2   5  -1    5.53    0.50   1
  -2   5   1    5.45    0.54  -2
   2  -5   1    5.45    0.54   1
  -2   5   1    5.71    0.55  -2
   2  -5   1    5.71    0.55   1
  -3   5  -1    3.15    0.41   1
  -3   5  -1    3.31    0.35   1
   3  -5   1    3.14    0.37   1
   3  -5   1    2.66    0.35   1
  -4   5  -1    0.48    0.26   1
  -4   5  -1   -0.18    0.29   1
   4  -5   1    0.12    0.23   1
   4  -5   1    0.38    0.25   1
  -5   5  -1    0.15    0.30   1
  -5   5  -1    0.06    0.33   1
   5  -5   1    0.02    0.25   1
   5  -5   1    0.19    0.26   1
   6  -5   0    0.07    0.38  -2
  -6   5  -1    0.07    0.38   1
   6  -5   0    0.23    0.35  -2
  -6   5  -1    0.23    0.35   1
  -6   5   0   -0.41    0.31  -2
   6  -5   1   -0.41    0.31   1
   7   4  -1    0.37    0.23   1
   7   4  -1    0.80    0.33   1
  -7  -4   1    0.54    0.27   1
  -7  -4   1    0.19    0.29   1
   6   4  -1    0.26    0.20   1
   6   4  -1    0.04    0.28   1
  -6  -4   1    0.18    0.21   1
  -6  -4   1    0.20    0.26   1
  -5  -4  -3    4.00    0.47  -2
   5   4  -1    4.00    0.47   1
   5   4   3    4.42    0.48  -2
  -5  -4   1    4.42    0.48   1
   5   4   3    3.75    0.44  -2
  -5  -4   1    3.75    0.44   1
   4   4  -1    1.14    0.24   1
  -4  -4   1    0.94    0.23   1
  -4  -4   1    0.68    0.21   1
   3   4  -1    0.04    0.19   1
   3   4  -1    0.00    0.13   1
  -3  -4   1    0.14    0.18   1
  -3  -4   1    0.28    0.18   1
  -3  -4   1    0.25    0.13   1
  -3  -4   1    0.08    0.15   1
  -2  -4  -2    1.33    0.22  -2
   2   4  -1    1.33    0.22   1
  -2  -4  -2    1.23    0.18  -2
   2   4  -1    1.23    0.18   1
   2   4   2    1.77    0.23  -2
  -2  -4   1    1.77    0.23   1
   2   4   2    1.64    0.22  -2
  -2  -4   1    1.64    0.22   1
   2   4   2    1.54    0.24  -2
  -2  -4   1    1.54    0.24   1
   2   4   2    1.36    0.22  -2
  -2  -4   1    1.36    0.22   1
   1   4  -1    2.80    0.30   1
  -1  -4   1    2.72    0.31   1
  -1  -4   1    3.15    0.32   1
  -1  -4   1    3.53    0.33   1
  -1  -4   1    2.82    0.31   1
  -1  -4   1    3.05    0.33   1
  -1  -4   1    2.57    0.29   1
   0   4  -1    1.47    0.21   1
   0   4  -1    1.46    0.19   1
   0  -4   1    1.12    0.20   1
   0  -4   1    1.43    0.20   1
   0  -4   1    1.53    0.21   1
   0  -4   1    1.13    0.23   1
   0  -4   1    1.38    0.22   1
  -1   4  -1    0.14    0.18   1
  -1   4  -1    0.04    0.15   1
   1  -4   1    0.11    0.16   1
   1  -4   1    0.33    0.16   1
   1  -4   1    0.18    0.18   1
   1  -4   1    0.33    0.17   1
   2  -4  -1    3.06    0.29  -2
  -2   4  -1    3.06    0.29   1
   2  -4  -1    3.33    0.34  -2
  -2   4  -1    3.33    0.34   1
  -2   4   1    2.70    0.31  -2
   2  -4   1    2.70    0.31   1
  -2   4   1    2.18    0.32  -2
   2  -4   1    2.18    0.32   1
  -3   4  -1    0.68    0.26   1
  -3   4  -1    1.19    0.20   1
   3  -4   1    0.36    0.20   1
   3  -4   1    0.72    0.21   1
  -4   4  -1    0.12    0.21   1
  -4   4  -1    0.15    0.28   1
   4  -4   1    0.62    0.21   1
   4  -4   1    1.08    0.24   1
   5  -4   0    0.15    0.33  -2
  -5   4  -1    0.15    0.33   1
   5  -4   0    0.15    0.28  -2
  -5   4  -1    0.15    0.28   1
  -5   4   0    0.29    0.24  -2
   5  -4   1    0.29    0.24   1
  -6   4  -1    1.11    0.37   1
  -6   4  -1    0.84    0.39   1
   6  -4   1    1.07    0.32   1
   7   3  -1   -0.02    0.19   1
   7   3  -1   -0.06    0.27   1
  -7  -3   1   -0.41    0.25   1
  -6  -3  -3    0.38    0.22  -2
   6   3  -1    0.38    0.22   1
  -6  -3  -3   -0.06    0.18  -2
   6   3  -1   -0.06    0.18   1
   6   3   3    0.03    0.26  -2
  -6  -3   1    0.03    0.26   1
   6   3   3    0.56    0.23  -2
  -6  -3   1    0.56    0.23   1
   5   3  -1    7.47    0.66   1
   5   3  -1    6.79    0.63   1
  -5  -3   1    6.59    0.65   1
  -5  -3   1    7.13    0.66   1
   4   3  -1    0.74    0.23   1
   4   3  -1    0.52    0.15   1
   4   3  -1    0.83    0.17   1
  -4  -3   1    0.84    0.22   1
  -4  -3   1    0.87    0.21   1
   3   3  -1    2.70    0.33   1
   3   3  -1    2.30    0.27   1
  -3  -3   1    3.03    0.33   1
  -3  -3   1    2.57    0.29   1
  -2  -3  -2   13.15    1.03  -2
   2   3  -1   13.15    1.03   1
  -2  -3  -2   12.41    1.04  -2
   2   3  -1   12.41    1.04   1
   2   3   2   12.88    1.03  -2
  -2  -3   1   12.88    1.03   1
   2   3   2   13.29    1.05  -2
  -2  -3   1   13.29    1.05   1
   2   3   2   12.58    1.03  -2
  -2  -3   1   12.58    1.03   1
   2   3   2   14.34    1.04  -2
  -2  -3   1   14.34    1.04   1
   2   3   2   12.78    1.05  -2
  -2  -3   1   12.78    1.05   1
   1   3  -1    1.34    0.19   1
  -1  -3   1    1.47    0.19   1
  -1  -3   1    1.52    0.21   1
  -1  -3   1    1.46    0.19   1
  -1  -3   1    1.32    0.17   1
  -1  -3   1    1.24    0.17   1
  -1  -3   1    1.19    0.19   1
   0   3  -1    0.09    0.11   1
   0   3  -1    0.09    0.13   1
   0  -3   1   -0.12    0.12   1
   0  -3   1    0.05    0.14   1
   0  -3   1   -0.04    0.11   1
   0  -3   1    0.02    0.14   1
   0  -3   1    0.07    0.14   1
   1  -3  -1    3.45    0.37  -2
  -1   3  -1    3.45    0.37   1
  -1   3   1    3.52    0.35  -2
   1  -3   1    3.52    0.35   1
  -1   3   1    3.61    0.36  -2
   1  -3   1    3.61    0.36   1
  -1   3   1    3.89    0.38  -2
   1  -3   1    3.89    0.38   1
  -1   3   1    3.53    0.36  -2
   1  -3   1    3.53    0.36   1
  -2   3  -1    1.81    0.26   1
  -2   3  -1    1.93    0.22   1
   2  -3   1    1.61    0.23   1
   2  -3   1    1.73    0.25   1
   2  -3   1    1.78    0.24   1
   2  -3   1    1.65    0.23   1
  -3   3  -1    0.73    0.19   1
  -3   3  -1    0.68    0.23   1
   3  -3   1    0.78    0.18   1
   3  -3   1    0.48    0.19   1
   3  -3   1    0.67    0.20   1
  -4   3  -1    0.41    0.25   1
  -4   3  -1    0.04    0.20   1
   4  -3   1   -0.13    0.16   1
   4  -3   1    0.03    0.18   1
   5  -3   0    0.51    0.26  -2
  -5   3  -1    0.51    0.26   1
   5  -3   0    1.08    0.33  -2
  -5   3  -1    1.08    0.33   1
  -5   3   0    0.54    0.24  -2
   5  -3   1    0.54    0.24   1
  -6   3  -1    2.46    0.37   1
  -6   3  -1    2.06    0.41   1
   6  -3   1    1.22    0.29   1
   6  -3   1    1.80    0.30   1
  -7   3  -1    0.87    0.42   1
  -7   3  -1    0.74    0.38   1
   7  -3   1    0.47    0.30   1
   7  -3   1    0.53    0.30   1
   7   2  -1    0.20    0.23   1
   7   2  -1   -0.02    0.19   1
  -7  -2   1    0.16    0.23   1
  -7  -2   1    0.11    0.21   1
  -6  -2  -3    4.16    0.45  -2
   6   2  -1    4.16    0.45   1
  -6  -2  -3    3.42    0.42  -2
   6   2  -1    3.42    0.42   1
   6   2   3    4.21    0.47  -2
  -6  -2   1    4.21    0.47   1
   6   2   3    3.97    0.46  -2
  -6  -2   1    3.97    0.46   1
   6   2   3    3.82    0.45  -2
  -6  -2   1    3.82    0.45   1
   6   2   3    3.95    0.43  -2
  -6  -2   1    3.95    0.43   1
   5   2  -1    0.00    0.18   1
   5   2  -1    0.31    0.16   1
  -5  -2   1   -0.05    0.18   1
  -5  -2   1   -0.04    0.18   1
  -5  -2   1    0.14    0.19   1
  -5  -2   1    0.03    0.22   1
   4   2  -1    0.15    0.14   1
   4   2  -1    0.34    0.19   1
   4   2  -1    0.11    0.13   1
  -4  -2   1    0.20    0.19   1
  -4  -2   1    0.31    0.16   1
  -4  -2   1    0.39    0.17   1
  -4  -2   1    0.34    0.18   1
  -3  -2  -2    7.27    0.63  -2
   3   2  -1    7.27    0.63   1
  -3  -2  -2    7.29    0.60  -2
   3   2  -1    7.29    0.60   1
  -3  -2  -2    7.25    0.63  -2
   3   2  -1    7.25    0.63   1
  -3  -2  -2    7.38    0.61  -2
   3   2  -1    7.38    0.61   1
  -3  -2  -2    7.24    0.62  -2
   3   2  -1    7.24    0.62   1
  -3  -2  -2    7.23    0.61  -2
   3   2  -1    7.23    0.61   1
   3   2   2    7.09    0.61  -2
  -3  -2   1    7.09    0.61   1
   3   2   2    7.46    0.63  -2
  -3  -2   1    7.46    0.63   1
   3   2   2    7.41    0.63  -2
  -3  -2   1    7.41    0.63   1
   3   2   2    7.19    0.61  -2
  -3  -2   1    7.19    0.61   1
   2   2  -1    4.65    0.43   1
   2   2  -1    4.46    0.43   1
   2   2  -1    4.61    0.41   1
   2   2  -1    4.75    0.40   1
   2   2  -1    5.09    0.44   1
  -2  -2   1    4.72    0.43   1
  -2  -2   1    5.07    0.44   1
  -2  -2   1    4.90    0.41   1
  -2  -2   1    4.54    0.41   1
   1   2  -1    2.16    0.22   1
   1   2  -1    1.76    0.20   1
  -1  -2   1    2.35    0.22   1
  -1  -2   1    2.04    0.22   1
  -1  -2   1    2.22    0.22   1
  -1  -2   1    2.02    0.22   1
   0   2  -1    0.56    0.10   1
   0   2  -1    0.51    0.12   1
   0   2  -1    0.69    0.12   1
   0  -2   1    0.39    0.14   1
   0  -2   1    0.64    0.13   1
   0  -2   1    0.67    0.13   1
   0  -2   1    0.53    0.11   1
   1  -2  -1    4.93    0.39  -2
  -1   2  -1    4.93    0.39   1
   1  -2  -1    3.91    0.41  -2
  -1   2  -1    3.91    0.41   1
   1  -2  -1    4.73    0.37  -2
  -1   2  -1    4.73    0.37   1
  -1   2   1    4.58    0.40  -2
   1  -2   1    4.58    0.40   1
  -1   2   1    4.44    0.42  -2
   1  -2   1    4.44    0.42   1
  -1   2   1    4.20    0.40  -2
   1  -2   1    4.20    0.40   1
  -1   2   1    4.36    0.40  -2
   1  -2   1    4.36    0.40   1
  -2   2  -1    0.43    0.18   1
  -2   2  -1    0.38    0.15   1
   2  -2   1    0.06    0.15   1
   2  -2   1    0.21    0.16   1
   2  -2   1    0.29    0.15   1
   2  -2   1    0.33    0.14   1
  -3   2  -1    0.55    0.18   1
  -3   2  -1    0.53    0.20   1
   3  -2   1    0.31    0.15   1
   4  -2   0    0.63    0.26  -2
  -4   2  -1    0.63    0.26   1
   4  -2   0    0.78    0.22  -2
  -4   2  -1    0.78    0.22   1
  -4   2   0    0.76    0.19  -2
   4  -2   1    0.76    0.19   1
  -5   2  -1    2.10    0.35   1
  -5   2  -1    1.84    0.32   1
   5  -2   1    1.25    0.26   1
   5  -2   1    1.52    0.24   1
  -6   2  -1    0.11    0.31   1
  -6   2  -1    0.06    0.26   1
   6  -2   1   -0.09    0.20   1
   6  -2   1    0.04    0.22   1
  -7   2  -1   -0.06    0.27   1
  -7   2  -1    0.28    0.31   1
   7  -2   1    0.10    0.24   1
   7  -2   1    0.10    0.22   1
   8   1  -1   -0.12    0.20   1
  -8  -1   1   -0.17    0.29   1
  -7  -1  -3    0.32    0.22  -2
   7   1  -1    0.32    0.22   1
  -7  -1  -3    0.65    0.23  -2
   7   1  -1    0.65    0.23   1
   7   1   3    0.84    0.28  -2
  -7  -1   1    0.84    0.28   1
   7   1   3    0.67    0.27  -2
  -7  -1   1    0.67    0.27   1
   6   1  -1    3.95    0.45   1
   6   1  -1    4.40    0.47   1
  -6  -1   1    4.86    0.47   1
  -6  -1   1    4.19    0.49   1
   5   1  -1    1.40    0.23   1
   5   1  -1    1.33    0.24   1
  -5  -1   1    0.98    0.25   1
  -5  -1   1    1.55    0.24   1
  -5  -1   1    1.39    0.25   1
   4   1  -1    2.31    0.23   1
  -4  -1   1    1.15    0.21   1
  -4  -1   1    1.36    0.22   1
  -4  -1   1    1.06    0.22   1
  -3  -1  -2   21.86    1.71  -2
   3   1  -1   21.86    1.71   1
  -3  -1  -2   22.03    1.71  -2
   3   1  -1   22.03    1.71   1
  -3  -1  -2   22.31    1.71  -2
   3   1  -1   22.31    1.71   1
  -3  -1  -2   22.34    1.71  -2
   3   1  -1   22.34    1.71   1
  -3  -1  -2   21.73    1.72  -2
   3   1  -1   21.73    1.72   1
  -3  -1  -2   21.83    1.71  -2
   3   1  -1   21.83    1.71   1
   3   1   2   22.68    1.72  -2
  -3  -1   1   22.68    1.72   1
   3   1   2   23.22    1.72  -2
  -3  -1   1   23.22    1.72   1
   3   1   2   21.79    1.71  -2
  -3  -1   1   21.79    1.71   1
   3   1   2   20.13    1.71  -2
  -3  -1   1   20.13    1.71   1
   2   1  -1    3.42    0.32   1
   2   1  -1    3.49    0.32   1
   2   1  -1    3.40    0.30   1
   2   1  -1    3.28    0.31   1
   2   1  -1    3.14    0.32   1
   2   1  -1    3.21    0.31   1
  -2  -1   1    3.60    0.32   1
  -2  -1   1    3.19    0.30   1
  -2  -1   1    3.57    0.33   1
  -2  -1   1    3.44    0.33   1
  -2  -1   1    3.31    0.31   1
   1   1  -1    1.68    0.19   1
   1   1  -1    1.58    0.18   1
   1   1  -1    1.59    0.16   1
   1   1  -1    1.97    0.17   1
   1   1  -1    1.80    0.17   1
   1   1  -1    1.94    0.19   1
  -1  -1   1    1.77    0.17   1
  -1  -1   1    1.66    0.18   1
  -1  -1   1    1.91    0.19   1
  -1  -1   1    1.56    0.18   1
  -1  -1   1    1.58    0.17   1
   0  -1  -1    0.37    0.07  -2
   0   1  -1    0.37    0.07   1
   0  -1  -1    0.26    0.08  -2
   0   1  -1    0.26    0.08   1
   0   1   1    0.37    0.07  -2
   0  -1   1    0.37    0.07   1
   0   1   1    0.32    0.08  -2
   0  -1   1    0.32    0.08   1
  -1   1  -1    0.02    0.12   1
  -1   1  -1    0.08    0.09   1
  -1   1  -1    0.09    0.09   1
   1  -1   1    0.19    0.10   1
   1  -1   1    0.11    0.11   1
   1  -1   1    0.08    0.09   1
   1  -1   1    0.10    0.11   1
  -2   1  -1    4.25    0.40   1
  -2   1  -1    4.17    0.38   1
  -2   1  -1    3.97    0.37   1
   2  -1   1    4.21    0.39   1
   2  -1   1    4.76    0.37   1
   2  -1   1    4.39    0.37   1
   2  -1   1    4.30    0.39   1
  -3   1  -1    0.22    0.18   1
  -3   1  -1    0.09    0.20   1
   3  -1   1    0.39    0.17   1
   3  -1   1    0.29    0.14   1
   3  -1   1    0.03    0.14   1
   3  -1   1    0.09    0.15   1
   4  -1   0    2.88    0.31  -2
  -4   1  -1    2.88    0.31   1
   4  -1   0    3.66    0.35  -2
  -4   1  -1    3.66    0.35   1
  -4   1   0    2.90    0.30  -2
   4  -1   1    2.90    0.30   1
  -4   1   0    2.70    0.28  -2
   4  -1   1    2.70    0.28   1
  -4   1   0    2.75    0.28  -2
   4  -1   1    2.75    0.28   1
  -4   1   0    1.88    0.25  -2
   4  -1   1    1.88    0.25   1
  -5   1  -1    4.30    0.43   1
  -5   1  -1    4.33    0.45   1
   5  -1   1    3.21    0.38   1
   5  -1   1    3.28    0.36   1
   5  -1   1    3.64    0.40   1
  -6   1  -1    2.32    0.36   1
  -6   1  -1    1.77    0.30   1
   6  -1   1    1.40    0.25   1
   6  -1   1    1.48    0.24   1
   7  -1   1    0.20    0.32  -2
  -7   1  -1    0.20    0.32   1
   7  -1   1    0.45    0.26  -2
  -7   1  -1    0.45    0.26   1
  -7   1  -1    0.34    0.17  -2
   7  -1   1    0.34    0.17   1
  -7   1  -1    0.09    0.16  -2
   7  -1   1    0.09    0.16   1
  -7   1  -1    0.07    0.20  -2
   7  -1   1    0.07    0.20   1
  -7   0  -3    2.00    0.33  -2
   7   0  -1    2.00    0.33   1
   7   0   3    2.88    0.40  -2
  -7   0   1    2.88    0.40   1
   7   0   3    2.41    0.38  -2
  -7   0   1    2.41    0.38   1
   6   0  -1    0.74    0.21   1
   6   0  -1    0.72    0.22   1
  -6   0   1    1.14    0.28   1
  -6   0   1    0.69    0.25   1
   5   0  -1    0.53    0.18   1
   5   0  -1    0.60    0.18   1
   5   0  -1    0.45    0.14   1
  -5   0   1    0.68    0.22   1
  -5   0   1    0.28    0.21   1
  -4   0  -2    5.77    0.58  -2
   4   0  -1    5.77    0.58   1
  -4   0  -2    6.12    0.56  -2
   4   0  -1    6.12    0.56   1
  -4   0  -2    6.90    0.58  -2
   4   0  -1    6.90    0.58   1
  -4   0  -2    7.30    0.60  -2
   4   0  -1    7.30    0.60   1
  -4   0  -2    7.09    0.57  -2
   4   0  -1    7.09    0.57   1
   4   0   2    7.07    0.61  -2
  -4   0   1    7.07    0.61   1
   4   0   2    7.39    0.58  -2
  -4   0   1    7.39    0.58   1
   3   0  -1    0.83    0.19   1
   3   0  -1    0.86    0.15   1
   3   0  -1    1.16    0.18   1
   3   0  -1    1.04    0.17   1
   3   0  -1    1.01    0.19   1
  -3   0   1    0.96    0.19   1
  -3   0   1    1.35    0.21   1
  -3   0   1    1.12    0.21   1
  -3   0   1    1.02    0.18   1
  -3   0   1    1.28    0.20   1
   2   0  -1    0.57    0.11   1
   2   0  -1    0.62    0.13   1
   2   0  -1    0.63    0.13   1
   2   0  -1    0.59    0.11   1
   2   0  -1    0.68    0.12   1
  -2   0   1    0.79    0.14   1
  -2   0   1    0.64    0.13   1
  -2   0   1    0.53    0.16   1
  -2   0   1    0.72    0.14   1
  -2   0   1    0.38    0.14   1
   1   0  -1    0.30    0.08   1
   1   0  -1    0.18    0.07   1
   1   0  -1    0.22    0.08   1
   1   0  -1    0.29    0.07   1
   1   0  -1    0.17    0.08   1
  -1   0   1    0.12    0.08   1
  -1   0   1    0.15    0.09   1
  -1   0   1    0.20    0.09   1
  -1   0   1    0.15    0.09   1
   0   0  -1   -0.01    0.01  -2
   0   0  -1   -0.01    0.01   1
   0   0  -1   -0.02    0.01  -2
   0   0  -1   -0.02    0.01   1
   0   0  -1   -0.01    0.01  -2
   0   0  -1   -0.01    0.01   1
   0   0  -1    0.01    0.02  -2
   0   0  -1    0.01    0.02   1
   0   0   1   -0.02    0.01  -2
   0   0   1   -0.02    0.01   1
   0   0   1   -0.02    0.02  -2
   0   0   1   -0.02    0.02   1
   0   0   1   -0.01    0.02  -2
   0   0   1   -0.01    0.02   1
   0   0   1    0.00    0.02  -2
   0   0   1    0.00    0.02   1
  -1   0  -1    0.06    0.08   1
  -1   0  -1   -0.02    0.09   1
  -1   0  -1   -0.02    0.09   1
  -1   0  -1   -0.03    0.06   1
  -1   0  -1    0.12    0.06   1
  -1   0  -1   -0.04    0.07   1
   1   0   1    0.00    0.07   1
   1   0   1    0.02    0.06   1
   1   0   1    0.01    0.08   1
   1   0   1    0.04    0.08   1
   1   0   1   -0.07    0.07   1
   1   0   1    0.08    0.07   1
  -2   0  -1    0.74    0.15   1
  -2   0  -1    0.45    0.11   1
  -2   0  -1    0.53    0.12   1
  -2   0  -1    0.48    0.13   1
   2   0   1    0.74    0.13   1
   2   0   1    0.82    0.14   1
   2   0   1    0.69    0.14   1
   2   0   1    0.62    0.12   1
   2   0   1    0.81    0.14   1
   2   0   1    0.30    0.11   1
   2   0   1    0.67    0.14   1
  -3   0  -1    1.76    0.24   1
  -3   0  -1    1.52    0.23   1
  -3   0  -1    2.09    0.23   1
   3   0   1    2.21    0.23   1
   3   0   1    1.84    0.23   1
   3   0   1    1.86    0.23   1
   3   0   1    2.36    0.24   1
   3   0   1    1.14    0.22   1
   3   0   1    1.07    0.19   1
   3   0   1    1.69    0.21   1
   3   0   1    1.57    0.21   1
   4   0   0    3.53    0.38  -2
  -4   0  -1    3.53    0.38   1
   4   0   0    3.89    0.36  -2
  -4   0  -1    3.89    0.36   1
   4   0   0    3.47    0.35  -2
  -4   0  -1    3.47    0.35   1
  -4   0   0    2.87    0.33  -2
   4   0   1    2.87    0.33   1
  -4   0   0    3.09    0.32  -2
   4   0   1    3.09    0.32   1
  -4   0   0    3.13    0.34  -2
   4   0   1    3.13    0.34   1
  -4   0   0    3.04    0.34  -2
   4   0   1    3.04    0.34   1
  -5   0  -1    0.18    0.20   1
  -5   0  -1    0.12    0.20   1
  -5   0  -1    0.31    0.22   1
   5   0   1   -0.04    0.16   1
   5   0   1    0.19    0.14   1
  -6   0  -1    0.20    0.25   1
  -6   0  -1    0.36    0.23   1
   6   0   1    0.15    0.18   1
   6   0   1    0.11    0.15   1
   7   0   1    0.52    0.31  -2
  -7   0  -1    0.52    0.31   1
   7   0   1    0.47    0.26  -2
  -7   0  -1    0.47    0.26   1
  -7   0  -1    0.35    0.19  -2
   7   0   1    0.35    0.19   1
  -7   0  -1    0.21    0.18  -2
   7   0   1    0.21    0.18   1
   8   0   1    0.03    0.18   1
  -7   1  -3    0.96    0.23  -2
   7  -1  -1    0.96    0.23   1
  -7   1  -3    0.95    0.23  -2
   7  -1  -1    0.95    0.23   1
   7  -1   3    1.20    0.31  -2
  -7   1   1    1.20    0.31   1
   7  -1   3    2.27    0.38  -2
  -7   1   1    2.27    0.38   1
   6  -1  -1    0.54    0.17   1
   6  -1  -1    0.39    0.16   1
  -6   1   1    0.88    0.30   1
  -6   1   1    0.40    0.27   1
   5  -1  -1    1.21    0.24   1
   5  -1  -1    0.95    0.21   1
   5  -1  -1    1.44    0.21   1
  -5   1   1    1.73    0.28   1
  -5   1   1    1.46    0.30   1
  -4   1  -2    8.57    0.69  -2
   4  -1  -1    8.57    0.69   1
  -4   1  -2    6.67    0.69  -2
   4  -1  -1    6.67    0.69   1
  -4   1  -2    8.35    0.69  -2
   4  -1  -1    8.35    0.69   1
   4  -1   2    9.30    0.73  -2
  -4   1   1    9.30    0.73   1
   4  -1   2    9.14    0.72  -2
  -4   1   1    9.14    0.72   1
   3  -1  -1    2.12    0.26   1
   3  -1  -1    2.57    0.27   1
   3  -1  -1    2.43    0.28   1
   3  -1  -1    2.46    0.27   1
   3  -1  -1    2.70    0.29   1
  -3   1   1    2.28    0.28   1
  -3   1   1    2.51    0.31   1
   2  -1  -1    2.93    0.25   1
   2  -1  -1    2.61    0.26   1
   2  -1  -1    2.19    0.25   1
  -2   1   1    2.12    0.24   1
  -2   1   1    2.14    0.26   1
   1  -1  -1    0.50    0.09   1
   1  -1  -1    0.21    0.12   1
   1  -1  -1    0.13    0.12   1
   1  -1  -1    0.26    0.10   1
  -1   1   1    0.16    0.10   1
  -1   1   1    0.09    0.13   1
  -1   1   1    0.51    0.10   1
   0   1  -1    0.58    0.08  -2
   0  -1  -1    0.58    0.08   1
   0   1  -1    0.46    0.08  -2
   0  -1  -1    0.46    0.08   1
   0   1  -1    0.49    0.08  -2
   0  -1  -1    0.49    0.08   1
   0  -1   1    0.46    0.09  -2
   0   1   1    0.46    0.09   1
   0  -1   1    0.46    0.09  -2
   0   1   1    0.46    0.09   1
   0  -1   1    0.44    0.09  -2
   0   1   1    0.44    0.09   1
  -1  -1  -1    3.87    0.34   1
  -1  -1  -1    3.99    0.33   1
  -1  -1  -1    3.92    0.33   1
  -1  -1  -1    4.14    0.33   1
  -1  -1  -1    4.20    0.34   1
   1   1   1    3.55    0.34   1
   1   1   1    4.26    0.33   1
   1   1   1    3.97    0.33   1
   1   1   1    4.18    0.33   1
   1   1   1    3.69    0.34   1
  -2  -1  -1    0.08    0.11   1
  -2  -1  -1    0.15    0.09   1
  -2  -1  -1    0.42    0.13   1
  -2  -1  -1    0.03    0.12   1
  -2  -1  -1    0.20    0.09   1
  -2  -1  -1    0.15    0.12   1
   2   1   1    0.30    0.10   1
   2   1   1    0.37    0.10   1
   2   1   1    0.21    0.10   1
   2   1   1    0.19    0.12   1
   2   1   1    0.12    0.12   1
   2   1   1    0.75    0.11   1
   3   1   0    7.16    0.62  -2
  -3  -1  -1    7.16    0.62   1
   3   1   0    7.67    0.62  -2
  -3  -1  -1    7.67    0.62   1
   3   1   0    6.89    0.58  -2
  -3  -1  -1    6.89    0.58   1
   3   1   0    7.00    0.61  -2
  -3  -1  -1    7.00    0.61   1
   3   1   0    7.63    0.61  -2
  -3  -1  -1    7.63    0.61   1
  -3  -1   0    7.55    0.60  -2
   3   1   1    7.55    0.60   1
  -3  -1   0    7.21    0.60  -2
   3   1   1    7.21    0.60   1
  -3  -1   0    7.13    0.60  -2
   3   1   1    7.13    0.60   1
  -3  -1   0    7.18    0.60  -2
   3   1   1    7.18    0.60   1
  -3  -1   0    7.20    0.62  -2
   3   1   1    7.20    0.62   1
  -3  -1   0    6.89    0.61  -2
   3   1   1    6.89    0.61   1
  -3  -1   0    7.03    0.59  -2
   3   1   1    7.03    0.59   1
  -4  -1  -1    4.29    0.42   1
  -4  -1  -1    4.44    0.43   1
  -4  -1  -1    4.41    0.44   1
   4   1   1    4.01    0.42   1
   4   1   1    4.40    0.38   1
   4   1   1    4.21    0.41   1
   4   1   1    4.93    0.42   1
   4   1   1    4.22    0.41   1
  -5  -1  -1    3.72    0.38   1
  -5  -1  -1    3.31    0.36   1
  -5  -1  -1    3.17    0.37   1
   5   1   1    2.92    0.32   1
   5   1   1    3.45    0.37   1
   5   1   1    3.52    0.36   1
  -6  -1  -1    1.86    0.29   1
  -6  -1  -1    1.84    0.29   1
  -6  -1  -1    1.65    0.29   1
   6   1   1    1.64    0.28   1
   6   1   1    1.21    0.22   1
   6   1   1    2.04    0.28   1
   7   1   1    0.03    0.24  -2
  -7  -1  -1    0.03    0.24   1
   7   1   1    0.01    0.24  -2
  -7  -1  -1    0.01    0.24   1
  -7  -1  -1    0.13    0.22  -2
   7   1   1    0.13    0.22   1
  -7  -1  -1    0.24    0.21  -2
   7   1   1    0.24    0.21   1
  -8  -1  -1    0.37    0.28   1
   8   1   1    0.35    0.24   1
   7  -2  -1    0.60    0.23   1
   7  -2  -1    0.51    0.23   1
  -7   2   1    1.03    0.35   1
  -7   2   1    0.79    0.35   1
   6  -2  -1    0.25    0.19   1
   6  -2  -1    0.45    0.23   1
  -6   2   1    0.68    0.34   1
   5  -2  -1    3.33    0.37   1
  -5   2   1    3.98    0.46   1
  -5   2   1    3.55    0.43   1
  -4   2  -2    0.05    0.17  -2
   4  -2  -1    0.05    0.17   1
  -4   2  -2   -0.08    0.15  -2
   4  -2  -1   -0.08    0.15   1
   4  -2   2   -0.12    0.22  -2
  -4   2   1   -0.12    0.22   1
   4  -2   2    0.04    0.21  -2
  -4   2   1    0.04    0.21   1
   3  -2  -1    0.13    0.16   1
   3  -2  -1   -0.03    0.14   1
   3  -2  -1    0.18    0.16   1
   3  -2  -1    0.05    0.14   1
  -3   2   1    0.26    0.17   1
  -3   2   1    0.09    0.20   1
   2  -2  -1    0.32    0.15   1
   2  -2  -1    0.14    0.13   1
  -2   2   1    0.15    0.15   1
  -2   2   1    0.35    0.16   1
  -2   2   1    0.13    0.17   1
  -1   2  -1    6.01    0.42  -2
   1  -2  -1    6.01    0.42   1
  -1   2  -1    5.15    0.45  -2
   1  -2  -1    5.15    0.45   1
  -1   2  -1    4.97    0.44  -2
   1  -2  -1    4.97    0.44   1
  -1   2  -1    4.69    0.45  -2
   1  -2  -1    4.69    0.45   1
   1  -2   1    4.24    0.45  -2
  -1   2   1    4.24    0.45   1
   1  -2   1    5.18    0.43  -2
  -1   2   1    5.18    0.43   1
   1  -2   1    4.79    0.45  -2
  -1   2   1    4.79    0.45   1
   0  -2  -1    0.24    0.12   1
   0  -2  -1    0.63    0.11   1
   0  -2  -1    0.61    0.13   1
   0   2   1    0.49    0.14   1
   0   2   1    0.53    0.13   1
   0   2   1    0.31    0.14   1
  -1  -2  -1    1.98    0.23   1
  -1  -2  -1    2.30    0.25   1
  -1  -2  -1    2.87    0.25   1
  -1  -2  -1    2.40    0.23   1
   1   2   1    2.33    0.23   1
   1   2   1    2.45    0.24   1
   1   2   1    2.30    0.23   1
   1   2   1    2.02    0.23   1
  -2  -2  -1    5.40    0.48   1
  -2  -2  -1    5.58    0.46   1
  -2  -2  -1    6.66    0.48   1
   2   2   1    4.28    0.47   1
   2   2   1    5.72    0.46   1
   2   2   1    5.56    0.46   1
   2   2   1    5.60    0.47   1
   2   2   1    5.87    0.49   1
   3   2   0    1.71    0.21  -2
  -3  -2  -1    1.71    0.21   1
   3   2   0    2.00    0.25  -2
  -3  -2  -1    2.00    0.25   1
   3   2   0    1.92    0.25  -2
  -3  -2  -1    1.92    0.25   1
  -3  -2   0    1.79    0.21  -2
   3   2   1    1.79    0.21   1
  -3  -2   0    1.87    0.22  -2
   3   2   1    1.87    0.22   1
  -3  -2   0    1.94    0.22  -2
   3   2   1    1.94    0.22   1
  -3  -2   0    1.93    0.24  -2
   3   2   1    1.93    0.24   1
  -3  -2   0    2.03    0.26  -2
   3   2   1    2.03    0.26   1
  -4  -2  -1    0.47    0.20   1
  -4  -2  -1    0.38    0.17   1
   4   2   1    0.24    0.14   1
   4   2   1    0.26    0.14   1
   4   2   1    0.19    0.17   1
  -5  -2  -1   -0.01    0.19   1
  -5  -2  -1   -0.08    0.20   1
  -5  -2  -1   -0.11    0.18   1
   5   2   1    0.04    0.15   1
   5   2   1   -0.02    0.18   1
   6   2   1    0.92    0.25  -2
  -6  -2  -1    0.92    0.25   1
   6   2   1    1.42    0.28  -2
  -6  -2  -1    1.42    0.28   1
  -6  -2  -1    1.16    0.26  -2
   6   2   1    1.16    0.26   1
  -6  -2  -1    1.21    0.25  -2
   6   2   1    1.21    0.25   1
  -7  -2  -1    0.06    0.28   1
   7   2   1   -0.10    0.24   1
   7   2   1   -0.19    0.19   1
   8   2   1    0.03    0.25   1
   7  -3  -1    0.03    0.25   1
   7  -3  -1    0.03    0.26   1
  -7   3   1    0.11    0.42   1
  -7   3   1    0.36    0.34   1
   6  -3  -1    1.02    0.27   1
  -6   3   1    1.33    0.33   1
  -6   3   1    1.03    0.39   1
  -5   3  -2    2.04    0.32  -2
   5  -3  -1    2.04    0.32   1
   5  -3   2    2.70    0.41  -2
  -5   3   1    2.70    0.41   1
   5  -3   2    2.15    0.35  -2
  -5   3   1    2.15    0.35   1
   4  -3  -1    0.54    0.21   1
   4  -3  -1    0.61    0.20   1
   4  -3  -1    0.62    0.18   1
  -4   3   1    0.54    0.23   1
  -4   3   1    0.80    0.26   1
   3  -3  -1    0.82    0.18   1
   3  -3  -1   -0.10    0.18   1
  -3   3   1    0.52    0.22   1
  -3   3   1    0.34    0.18   1
  -3   3   1    0.02    0.19   1
   2  -3  -1    2.09    0.26   1
   2  -3  -1    1.85    0.24   1
   2  -3  -1    1.81    0.25   1
   2  -3  -1    1.80    0.24   1
  -2   3   1    1.49    0.25   1
  -2   3   1    2.32    0.25   1
  -2   3   1    1.82    0.27   1
  -1   3  -1    3.11    0.31  -2
   1  -3  -1    3.11    0.31   1
  -1   3  -1    2.91    0.33  -2
   1  -3  -1    2.91    0.33   1
  -1   3  -1    3.23    0.34  -2
   1  -3  -1    3.23    0.34   1
   1  -3   1    3.19    0.32  -2
  -1   3   1    3.19    0.32   1
   1  -3   1    2.98    0.33  -2
  -1   3   1    2.98    0.33   1
   1  -3   1    3.06    0.32  -2
  -1   3   1    3.06    0.32   1
   0  -3  -1   -0.04    0.13   1
   0  -3  -1    0.13    0.13   1
   0  -3  -1    0.05    0.11   1
   0   3   1    0.12    0.14   1
   0   3   1    0.05    0.12   1
   0   3   1   -0.24    0.16   1
  -1  -3  -1    2.65    0.29   1
  -1  -3  -1    3.22    0.29   1
  -1  -3  -1    2.90    0.28   1
  -1  -3  -1    2.78    0.28   1
   1   3   1    2.31    0.27   1
   1   3   1    2.61    0.28   1
   1   3   1    2.68    0.27   1
   2   3   0    4.89    0.43  -2
  -2  -3  -1    4.89    0.43   1
   2   3   0    4.25    0.43  -2
  -2  -3  -1    4.25    0.43   1
   2   3   0    4.52    0.40  -2
  -2  -3  -1    4.52    0.40   1
   2   3   0    4.83    0.42  -2
  -2  -3  -1    4.83    0.42   1
   2   3   0    4.39    0.41  -2
  -2  -3  -1    4.39    0.41   1
  -2  -3   0    4.35    0.41  -2
   2   3   1    4.35    0.41   1
  -2  -3   0    5.14    0.44  -2
   2   3   1    5.14    0.44   1
  -2  -3   0    4.18    0.43  -2
   2   3   1    4.18    0.43   1
  -2  -3   0    4.38    0.46  -2
   2   3   1    4.38    0.46   1
  -3  -3  -1    1.11    0.20   1
  -3  -3  -1    1.31    0.20   1
   3   3   1    1.09    0.21   1
   3   3   1    0.13    0.12   1
   3   3   1    0.74    0.15   1
   3   3   1    0.66    0.16   1
  -4  -3  -1    3.03    0.33   1
  -4  -3  -1    3.01    0.34   1
   4   3   1    2.25    0.28   1
   4   3   1    2.33    0.28   1
  -5  -3  -1   10.79    0.85   1
  -5  -3  -1   10.01    0.84   1
   5   3   1   10.21    0.85   1
   5   3   1    7.89    0.81   1
   6   3   1    0.06    0.24  -2
  -6  -3  -1    0.06    0.24   1
  -6  -3  -1    0.23    0.25  -2
   6   3   1    0.23    0.25   1
  -6  -3  -1   -0.11    0.18  -2
   6   3   1   -0.11    0.18   1
  -7  -3  -1    0.41    0.29   1
   7   3   1    0.47    0.27   1
   7   3   1    0.09    0.23   1
   6  -4  -1    0.63    0.31   1
  -6   4   1    1.29    0.40   1
  -6   4   1    1.42    0.37   1
  -5   4  -2   -0.40    0.23  -2
   5  -4  -1   -0.40    0.23   1
   5  -4   2   -0.22    0.27  -2
  -5   4   1   -0.22    0.27   1
   5  -4   2    0.08    0.30  -2
  -5   4   1    0.08    0.30   1
   4  -4  -1    0.14    0.18   1
   4  -4  -1    0.36    0.22   1
  -4   4   1   -0.03    0.24   1
  -4   4   1    0.15    0.28   1
   3  -4  -1    0.48    0.21   1
  -3   4   1    0.83    0.25   1
  -3   4   1    0.78    0.21   1
   1  -4  -1    1.06    0.16   1
   1  -4  -1    0.73    0.18   1
   1  -4  -1    0.59    0.18   1
   1  -4  -1    0.50    0.18   1
  -1   4   1    0.23    0.19   1
  -1   4   1    0.14    0.17   1
  -1   4   1    0.29    0.19   1
   0  -4  -1    0.79    0.19   1
   0  -4  -1    1.22    0.20   1
   0  -4  -1    1.30    0.19   1
   0   4   1    0.57    0.20   1
   0   4   1    0.98    0.22   1
   0   4   1    1.23    0.20   1
  -1  -4  -1    2.95    0.33   1
  -1  -4  -1    3.44    0.35   1
  -1  -4  -1    3.79    0.35   1
  -1  -4  -1    3.61    0.35   1
   1   4   1    3.15    0.33   1
   1   4   1    2.95    0.35   1
   1   4   1    2.88    0.33   1
   2   4   0   -0.11    0.15  -2
  -2  -4  -1   -0.11    0.15   1
   2   4   0   -0.07    0.15  -2
  -2  -4  -1   -0.07    0.15   1
   2   4   0   -0.06    0.17  -2
  -2  -4  -1   -0.06    0.17   1
   2   4   0    0.09    0.12  -2
  -2  -4  -1    0.09    0.12   1
  -2  -4   0   -0.23    0.17  -2
   2   4   1   -0.23    0.17   1
  -2  -4   0   -0.02    0.15  -2
   2   4   1   -0.02    0.15   1
  -2  -4   0   -0.04    0.17  -2
   2   4   1   -0.04    0.17   1
  -3  -4  -1    0.23    0.14   1
  -3  -4  -1    0.18    0.18   1
  -3  -4  -1    0.20    0.17   1
  -3  -4  -1    0.44    0.16   1
   3   4   1    0.42    0.16   1
  -4  -4  -1    0.23    0.21   1
  -4  -4  -1    0.31    0.19   1
   4   4   1    0.18    0.14   1
   5   4   1    1.48    0.28  -2
  -5  -4  -1    1.48    0.28   1
   5   4   1    1.76    0.31  -2
  -5  -4  -1    1.76    0.31   1
  -5  -4  -1    1.97    0.34  -2
   5   4   1    1.97    0.34   1
  -6  -4  -1    0.22    0.23   1
  -6  -4  -1    0.20    0.26   1
   6   4   1    0.02    0.28   1
   6   4   1   -0.07    0.18   1
  -7  -4  -1    0.03    0.30   1
   7   4   1    0.44    0.32   1
   7   4   1   -0.15    0.19   1
  -6   5  -2    0.38    0.34  -2
   6  -5  -1    0.38    0.34   1
   6  -5   2    0.35    0.35  -2
  -6   5   1    0.35    0.35   1
   6  -5   2    0.61    0.42  -2
  -6   5   1    0.61    0.42   1
   5  -5  -1    0.38    0.25   1
   5  -5  -1    0.61    0.27   1
  -5   5   1    0.44    0.36   1
  -5   5   1   -0.12    0.30   1
   4  -5  -1    0.18    0.22   1
   4  -5  -1    0.80    0.26   1
  -4   5   1    0.24    0.24   1
  -4   5   1   -0.19    0.29   1
   3  -5  -1    2.22    0.31   1
   3  -5  -1    2.17    0.30   1
  -3   5   1    2.24    0.30   1
  -3   5   1    2.24    0.36   1
  -2   5  -1    6.52    0.59  -2
   2  -5  -1    6.52    0.59   1
   2  -5   1    6.25    0.61  -2
  -2   5   1    6.25    0.61   1
   2  -5   1    6.43    0.62  -2
  -2   5   1    6.43    0.62   1
   1  -5  -1    0.98    0.17   1
   1  -5  -1    0.91    0.22   1
  -1   5   1    1.15    0.24   1
  -1   5   1    0.82    0.22   1
  -1   5   1    0.38    0.19   1
   0  -5  -1    4.62    0.41   1
   0  -5  -1    4.65    0.41   1
   0   5   1    3.91    0.42   1
   0   5   1    4.08    0.42   1
   0   5   1    3.26    0.42   1
   1   5   0    0.22    0.17  -2
  -1  -5  -1    0.22    0.17   1
   1   5   0    0.45    0.18  -2
  -1  -5  -1    0.45    0.18   1
   1   5   0    0.53    0.16  -2
  -1  -5  -1    0.53    0.16   1
   1   5   0    0.41    0.15  -2
  -1  -5  -1    0.41    0.15   1
  -1  -5   0    0.63    0.19  -2
   1   5   1    0.63    0.19   1
  -1  -5   0    0.48    0.21  -2
   1   5   1    0.48    0.21   1
  -2  -5  -1   -0.04    0.18   1
  -2  -5  -1   -0.19    0.13   1
  -2  -5  -1   -0.30    0.16   1
   2   5   1   -0.19    0.15   1
  -3  -5  -1    0.43    0.19   1
  -3  -5  -1    0.63    0.21   1
  -3  -5  -1    0.53    0.19   1
  -4  -5  -1   26.18    2.09   1
  -4  -5  -1   26.44    2.08   1
   5   5   1   -0.15    0.24  -2
  -5  -5  -1   -0.15    0.24   1
   5   5   1   -0.20    0.19  -2
  -5  -5  -1   -0.20    0.19   1
  -5  -5  -1    0.24    0.32  -2
   5   5   1    0.24    0.32   1
  -6  -5  -1    0.00    0.27   1
  -6  -5  -1   -0.25    0.20   1
   6   5   1    0.07    0.31   1
  -7  -5  -1    0.17    0.32   1
  -7  -5  -1    0.42    0.28   1
   7   5   1    0.40    0.35   1
   5  -6  -1   -0.19    0.26   1
   5  -6  -1    0.10    0.28   1
  -5   6   1    0.41    0.33   1
  -5   6   1    0.25    0.35   1
   4  -6  -1    0.48    0.28   1
   4  -6  -1    0.76    0.30   1
  -4   6   1    0.49    0.32   1
  -4   6   1    0.49    0.29   1
  -3   6  -1    3.49    0.41  -2
   3  -6  -1    3.49    0.41   1
  -3   6  -1    4.30    0.45  -2
   3  -6  -1    4.30    0.45   1
   2  -6  -1    0.29    0.21   1
   2  -6  -1   -0.02    0.20   1
  -2   6   1   -0.32    0.24   1
   1  -6  -1    0.17    0.20   1
   1  -6  -1    1.05    0.23   1
   1  -6  -1    0.48    0.18   1
  -1   6   1    0.30    0.23   1
   0  -6  -1    0.68    0.19   1
   0  -6  -1    0.78    0.19   1
   0   6   1    0.74    0.23   1
   1   6   0    0.26    0.16  -2
  -1  -6  -1    0.26    0.16   1
   1   6   0    0.30    0.19  -2
  -1  -6  -1    0.30    0.19   1
   1   6   0    0.12    0.20  -2
  -1  -6  -1    0.12    0.20   1
   1   6   0    0.30    0.19  -2
  -1  -6  -1    0.30    0.19   1
  -2  -6  -1    0.60    0.22   1
  -2  -6  -1    0.18    0.19   1
  -2  -6  -1    0.02    0.18   1
   2   6   1    0.20    0.19   1
  -3  -6  -1    0.16    0.21   1
  -3  -6  -1    0.04    0.19   1
  -3  -6  -1    0.74    0.23   1
   3   6   1    0.10    0.17   1
   4   6   1    1.85    0.32  -2
  -4  -6  -1    1.85    0.32   1
   4   6   1    1.64    0.28  -2
  -4  -6  -1    1.64    0.28   1
   4   6   1    1.42    0.26  -2
  -4  -6  -1    1.42    0.26   1
  -5  -6  -1    0.32    0.26   1
  -5  -6  -1   -0.16    0.23   1
   5   6   1   -0.02    0.34   1
  -6  -6  -1    0.29    0.27   1
  -6  -6  -1   -0.06    0.28   1
   6   6   1   -0.08    0.39   1
   4  -7  -1    1.51    0.39   1
   4  -7  -1    1.37    0.35   1
  -4   7   1    1.68    0.42   1
  -4   7   1    1.83    0.37   1
  -3   7  -1    4.72    0.54  -2
   3  -7  -1    4.72    0.54   1
  -3   7  -1    5.18    0.56  -2
   3  -7  -1    5.18    0.56   1
   3  -7   1    5.23    0.52  -2
  -3   7   1    5.23    0.52   1
   3  -7   1    5.34    0.61  -2
  -3   7   1    5.34    0.61   1
   2  -7  -1    0.64    0.27   1
   2  -7  -1    0.58    0.25   1
  -2   7   1    0.33    0.28   1
   1  -7  -1    3.97    0.45   1
   1  -7  -1    3.72    0.44   1
   1  -7  -1    4.07    0.43   1
  -1   7   1    4.02    0.45   1
   0   7   0   -0.15    0.19  -2
   0  -7  -1   -0.15    0.19   1
   0   7   0   -0.15    0.23  -2
   0  -7  -1   -0.15    0.23   1
   0   7   0    0.22    0.20  -2
   0  -7  -1    0.22    0.20   1
   0  -7   0   -0.02    0.21  -2
   0   7   1   -0.02    0.21   1
  -1  -7  -1    0.35    0.22   1
  -1  -7  -1    0.08    0.20   1
  -1  -7  -1    0.17    0.23   1
   1   7   1   -0.17    0.20   1
  -2  -7  -1    0.24    0.24   1
  -2  -7  -1    0.06    0.20   1
  -2  -7  -1    0.17    0.19   1
  -2  -7  -1    0.32    0.23   1
  -3  -7  -1   32.30    2.34   1
  -3  -7  -1   27.35    2.33   1
  -3  -7  -1   29.75    2.35   1
   4   7   1    0.05    0.25  -2
  -4  -7  -1    0.05    0.25   1
   4   7   1    0.55    0.26  -2
  -4  -7  -1    0.55    0.26   1
   4   7   1    0.40    0.22  -2
  -4  -7  -1    0.40    0.22   1
  -5  -7  -1    0.06    0.26   1
  -5  -7  -1    0.07    0.24   1
  -5  -7  -1   -0.06    0.22   1
   5   7   1   -0.13    0.32   1
  -6  -7  -1    0.03    0.28   1
  -6  -7  -1    0.31    0.31   1
   6   7   1    0.26    0.39   1
   3  -8  -1    0.13    0.34   1
   3  -8  -1   -0.02    0.31   1
  -3   8   1   -0.20    0.18   1
  -3   8   1    0.29    0.35   1
   2  -8  -1    0.96    0.32   1
   2  -8  -1    0.97    0.29   1
  -2   8   1    0.24    0.31   1
   1  -8  -1    0.64    0.27   1
   1  -8  -1   -0.07    0.24   1
  -1   8   1    0.14    0.26   1
   0   8   0    0.06    0.23  -2
   0  -8  -1    0.06    0.23   1
   0   8   0    0.16    0.22  -2
   0  -8  -1    0.16    0.22   1
   0   8   0    0.19    0.26  -2
   0  -8  -1    0.19    0.26   1
   0  -8   0    0.04    0.25  -2
   0   8   1    0.04    0.25   1
  -1  -8  -1    0.19    0.25   1
  -1  -8  -1    0.16    0.23   1
  -1  -8  -1    0.50    0.26   1
  -1  -8  -1    0.41    0.24   1
   1   8   1   -0.08    0.22   1
  -2  -8  -1    0.22    0.24   1
  -2  -8  -1   -0.25    0.23   1
  -2  -8  -1    0.25    0.23   1
  -2  -8  -1    0.21    0.23   1
   3   8   1    0.85    0.27  -2
  -3  -8  -1    0.85    0.27   1
   3   8   1    0.81    0.28  -2
  -3  -8  -1    0.81    0.28   1
   3   8   1    0.84    0.29  -2
  -3  -8  -1    0.84    0.29   1
   4   8   1    0.08    0.27  -2
  -4  -8  -1    0.08    0.27   1
   4   8   1    0.15    0.26  -2
  -4  -8  -1    0.15    0.26   1
   4   8   1    0.14    0.27  -2
  -4  -8  -1    0.14    0.27   1
  -5  -8  -1   -0.19    0.15   1
  -5  -8  -1    0.52    0.26   1
  -5  -8  -1    0.15    0.32   1
   5   8   1    0.23    0.37   1
   2  -9  -1    2.05    0.43   1
   2  -9  -1    1.92    0.37   1
  -2   9   1    1.41    0.39   1
  -1   9   0    0.59    0.32  -2
   1  -9  -1    0.59    0.32   1
  -1   9   0    0.21    0.32  -2
   1  -9  -1    0.21    0.32   1
   1  -9   0   -0.02    0.32  -2
  -1   9   1   -0.02    0.32   1
   0   9   0    0.08    0.24  -2
   0  -9  -1    0.08    0.24   1
   0   9   0    0.38    0.27  -2
   0  -9  -1    0.38    0.27   1
   0   9   0   -0.09    0.28  -2
   0  -9  -1   -0.09    0.28   1
   0  -9   0    0.12    0.27  -2
   0   9   1    0.12    0.27   1
  -1  -9  -1    0.01    0.26   1
  -1  -9  -1    0.64    0.29   1
  -1  -9  -1    0.07    0.28   1
  -1  -9  -1    0.15    0.26   1
  -2  -9  -1   16.72    1.36   1
  -2  -9  -1   15.18    1.34   1
  -2  -9  -1   16.46    1.37   1
   3   9   1   -0.54    0.28  -2
  -3  -9  -1   -0.54    0.28   1
   3   9   1    0.46    0.27  -2
  -3  -9  -1    0.46    0.27   1
   3   9   1   -0.18    0.31  -2
  -3  -9  -1   -0.18    0.31   1
  -3  -9  -4    1.75    0.43  -2
   3   9  -2    1.75    0.43   1
   3   9   4    1.89    0.41  -2
  -3  -9   2    1.89    0.41   1
   3   9   4    1.73    0.39  -2
  -3  -9   2    1.73    0.39   1
   3   9   4    1.75    0.35  -2
  -3  -9   2    1.75    0.35   1
   2   9  -2    3.88    0.54   1
  -2  -9   2    4.13    0.50   1
  -2  -9   2    3.68    0.50   1
  -2  -9   2    4.38    0.49   1
   1   9  -2    0.41    0.35   1
  -1  -9   2    0.52    0.26   1
  -1  -9   2    0.27    0.27   1
  -1  -9   2    0.19    0.27   1
  -1  -9   2    0.65    0.30   1
   0  -9  -3    0.32    0.31  -2
   0   9  -2    0.32    0.31   1
   0   9   3    0.29    0.29  -2
   0  -9   2    0.29    0.29   1
   0   9   3    0.07    0.25  -2
   0  -9   2    0.07    0.25   1
   0   9   3   -0.75    0.29  -2
   0  -9   2   -0.75    0.29   1
   1  -9  -3    0.17    0.19  -2
  -1   9  -2    0.17    0.19   1
  -1   9   3    1.35    0.35  -2
   1  -9   2    1.35    0.35   1
  -1   9   3    0.68    0.31  -2
   1  -9   2    0.68    0.31   1
   5   8  -2    0.28    0.34   1
  -5  -8   2    0.49    0.26   1
  -5  -8   2   -0.21    0.15   1
  -4  -8  -4    1.10    0.39  -2
   4   8  -2    1.10    0.39   1
   4   8   4    1.11    0.34  -2
  -4  -8   2    1.11    0.34   1
   4   8   4    1.12    0.29  -2
  -4  -8   2    1.12    0.29   1
   4   8   4    1.09    0.32  -2
  -4  -8   2    1.09    0.32   1
  -3  -8  -4    2.81    0.47  -2
   3   8  -2    2.81    0.47   1
   3   8   4    3.76    0.42  -2
  -3  -8   2    3.76    0.42   1
   3   8   4    3.13    0.40  -2
  -3  -8   2    3.13    0.40   1
   3   8   4    2.84    0.44  -2
  -3  -8   2    2.84    0.44   1
  -2  -8   2    8.76    0.78   1
  -2  -8   2    8.85    0.76   1
  -2  -8   2    7.74    0.78   1
  -2  -8   2    8.47    0.79   1
  -1  -8   2    0.27    0.27   1
  -1  -8   2    0.22    0.23   1
  -1  -8   2   -0.12    0.22   1
  -1  -8   2    0.28    0.21   1
   0   8   3    0.36    0.26  -2
   0  -8   2    0.36    0.26   1
   0   8   3    0.11    0.22  -2
   0  -8   2    0.11    0.22   1
  -1   8  -2    0.64    0.27   1
   1  -8   2    0.84    0.29   1
   1  -8   2    0.38    0.24   1
  -2   8  -2    0.57    0.32   1
   2  -8   2    0.89    0.29   1
   2  -8   2    1.19    0.31   1
  -3   8  -2    0.04    0.33   1
   3  -8   2   -0.02    0.31   1
   3  -8   2    0.40    0.32   1
   6   7  -2    0.63    0.41   1
  -6  -7   2    0.25    0.27   1
   5   7  -2    0.18    0.33   1
  -5  -7   2    0.30    0.26   1
  -5  -7   2   -0.33    0.21   1
  -5  -7   2    0.40    0.29   1
  -4  -7  -4    1.73    0.39  -2
   4   7  -2    1.73    0.39   1
   4   7   4    1.59    0.34  -2
  -4  -7   2    1.59    0.34   1
   4   7   4    2.04    0.33  -2
  -4  -7   2    2.04    0.33   1
   4   7   4    1.55    0.32  -2
  -4  -7   2    1.55    0.32   1
   3   7  -2    3.28    0.48   1
  -3  -7   2    3.07    0.40   1
  -3  -7   2    3.42    0.44   1
  -3  -7   2    3.57    0.42   1
   2   7  -2    0.59    0.28   1
  -2  -7   2    0.58    0.23   1
  -2  -7   2    0.45    0.22   1
  -2  -7   2    0.30    0.24   1
  -1  -7   2    0.65    0.21   1
  -1  -7   2    0.24    0.25   1
  -1  -7   2    0.13    0.20   1
  -1  -7   2    0.20    0.23   1
   0  -7  -3    4.65    0.50  -2
   0   7  -2    4.65    0.50   1
   0   7   3    5.11    0.49  -2
   0  -7   2    5.11    0.49   1
   0   7   3    5.48    0.54  -2
   0  -7   2    5.48    0.54   1
   0   7   3    4.84    0.50  -2
   0  -7   2    4.84    0.50   1
  -1   7  -2    1.90    0.30   1
   1  -7   2    1.83    0.30   1
   1  -7   2    1.99    0.30   1
  -2   7  -2    1.44    0.34   1
   2  -7   2    2.17    0.35   1
   2  -7   2    1.87    0.30   1
   3  -7  -2    0.20    0.33  -2
  -3   7  -2    0.20    0.33   1
  -3   7   2    0.18    0.25  -2
   3  -7   2    0.18    0.25   1
  -3   7   2    0.07    0.26  -2
   3  -7   2    0.07    0.26   1
  -4   7  -2    0.19    0.18   1
  -4   7  -2    0.81    0.39   1
   4  -7   2    0.33    0.30   1
   4  -7   2    0.31    0.32   1
   6   6  -2    0.38    0.32   1
  -6  -6   2    0.09    0.23   1
  -6  -6   2    0.13    0.29   1
   5   6  -2    0.53    0.33   1
  -5  -6   2    0.27    0.25   1
  -5  -6   2    0.55    0.24   1
  -4  -6  -4    7.83    0.76  -2
   4   6  -2    7.83    0.76   1
   4   6   4    7.73    0.74  -2
  -4  -6   2    7.73    0.74   1
   4   6   4    8.15    0.71  -2
  -4  -6   2    8.15    0.71   1
   4   6   4    7.29    0.69  -2
  -4  -6   2    7.29    0.69   1
   3   6  -2    7.31    0.68   1
  -3  -6   2    6.70    0.65   1
  -3  -6   2    5.57    0.63   1
  -3  -6   2    7.40    0.63   1
  -2  -6   2    0.44    0.22   1
  -2  -6   2    0.39    0.20   1
  -2  -6   2    0.22    0.14   1
  -2  -6   2    0.39    0.18   1
   1   6   3    0.01    0.16  -2
  -1  -6   2    0.01    0.16   1
   1   6   3    0.16    0.19  -2
  -1  -6   2    0.16    0.19   1
   1   6   3    0.07    0.18  -2
  -1  -6   2    0.07    0.18   1
   1   6   3    0.15    0.18  -2
  -1  -6   2    0.15    0.18   1
   0   6  -2    1.92    0.25   1
   0  -6   2    1.57    0.24   1
   0  -6   2    1.80    0.26   1
   0  -6   2    1.75    0.27   1
  -1   6  -2    1.49    0.27   1
   1  -6   2    1.37    0.26   1
   1  -6   2    1.52    0.26   1
  -2   6  -2    0.73    0.27   1
   2  -6   2    0.40    0.23   1
   2  -6   2    1.08    0.24   1
   3  -6  -2    3.58    0.48  -2
  -3   6  -2    3.58    0.48   1
   3  -6  -2    5.29    0.47  -2
  -3   6  -2    5.29    0.47   1
  -3   6   2    3.76    0.46  -2
   3  -6   2    3.76    0.46   1
  -3   6   2    4.14    0.46  -2
   3  -6   2    4.14    0.46   1
  -4   6  -2    0.01    0.27   1
  -4   6  -2    0.50    0.35   1
   4  -6   2    0.18    0.27   1
   4  -6   2    0.32    0.29   1
  -5   6  -2   -0.29    0.38   1
  -5   6  -2    0.18    0.37   1
   5  -6   2   -0.02    0.29   1
   5  -6   2   -0.02    0.31   1
   7   5  -2   -0.11    0.33   1
  -7  -5   2   -0.10    0.24   1
  -7  -5   2   -0.03    0.31   1
   6   5  -2    0.79    0.30   1
  -6  -5   2    0.47    0.25   1
  -6  -5   2    0.35    0.29   1
  -5  -5  -4    1.51    0.35  -2
   5   5  -2    1.51    0.35   1
   5   5   4    1.54    0.29  -2
  -5  -5   2    1.54    0.29   1
   5   5   4    1.60    0.31  -2
  -5  -5   2    1.60    0.31   1
   4   5  -2    1.22    0.29   1
  -4  -5   2    1.23    0.28   1
  -4  -5   2    1.12    0.24   1
  -4  -5   2    0.93    0.19   1
   3   5  -2    2.90    0.34   1
   3   5  -2    3.46    0.43   1
  -3  -5   2    3.68    0.40   1
  -3  -5   2    3.84    0.43   1
  -3  -5   2    3.83    0.38   1
   2   5  -2    1.04    0.24   1
  -2  -5   2    1.08    0.21   1
  -2  -5   2    1.35    0.23   1
  -2  -5   2    1.48    0.24   1
  -1  -5  -3   16.78    1.46  -2
   1   5  -2   16.78    1.46   1
   1   5   3   19.60    1.47  -2
  -1  -5   2   19.60    1.47   1
   1   5   3   19.67    1.45  -2
  -1  -5   2   19.67    1.45   1
   1   5   3   19.07    1.46  -2
  -1  -5   2   19.07    1.46   1
   1   5   3   17.73    1.45  -2
  -1  -5   2   17.73    1.45   1
   0   5  -2    5.46    0.57   1
   0   5  -2    7.92    0.60   1
   0  -5   2    7.23    0.62   1
   0  -5   2    7.00    0.58   1
   0  -5   2    7.02    0.60   1
  -1   5  -2    4.08    0.45   1
   1  -5   2    4.70    0.44   1
   1  -5   2    4.43    0.45   1
   2  -5  -2    1.95    0.28  -2
  -2   5  -2    1.95    0.28   1
  -2   5   2    1.25    0.25  -2
   2  -5   2    1.25    0.25   1
  -2   5   2    1.43    0.27  -2
   2  -5   2    1.43    0.27   1
  -3   5  -2    0.71    0.28   1
  -3   5  -2    0.64    0.23   1
   3  -5   2    0.60    0.23   1
   3  -5   2    0.56    0.23   1
  -4   5  -2    3.24    0.45   1
  -4   5  -2    3.34    0.39   1
   4  -5   2    2.81    0.39   1
   4  -5   2    3.73    0.41   1
  -5   5  -2    0.29    0.32   1
  -5   5  -2    0.73    0.34   1
   5  -5   2    0.34    0.29   1
   5  -5   2    0.37    0.27   1
   6  -5  -1    0.47    0.43  -2
  -6   5  -2    0.47    0.43   1
   6  -5  -1    0.85    0.39  -2
  -6   5  -2    0.85    0.39   1
  -6   5   1    0.87    0.34  -2
   6  -5   2    0.87    0.34   1
   7   4  -2   -0.09    0.29   1
   7   4  -2   -0.30    0.21   1
  -7  -4   2    0.39    0.24   1
  -7  -4   2   -0.29    0.28   1
   6   4  -2    0.24    0.20   1
   6   4  -2    0.21    0.27   1
  -6  -4   2    0.08    0.21   1
  -6  -4   2    0.29    0.28   1
  -5  -4  -4    9.09    0.85  -2
   5   4  -2    9.09    0.85   1
   5   4   4    9.35    0.84  -2
  -5  -4   2    9.35    0.84   1
   5   4   4    9.76    0.83  -2
  -5  -4   2    9.76    0.83   1
  -4  -4   2    3.90    0.38   1
  -4  -4   2    2.06    0.34   1
   3   4  -2    1.86    0.24   1
   3   4  -2    2.22    0.30   1
  -3  -4   2    2.53    0.30   1
  -3  -4   2    2.51    0.31   1
  -3  -4   2    2.10    0.26   1
  -3  -4   2    2.15    0.27   1
  -2  -4  -3    3.04    0.33  -2
   2   4  -2    3.04    0.33   1
  -2  -4  -3    2.79    0.34  -2
   2   4  -2    2.79    0.34   1
  -2  -4  -3    2.88    0.28  -2
   2   4  -2    2.88    0.28   1
   2   4   3    2.67    0.32  -2
  -2  -4   2    2.67    0.32   1
   2   4   3    3.43    0.32  -2
  -2  -4   2    3.43    0.32   1
   2   4   3    3.07    0.35  -2
  -2  -4   2    3.07    0.35   1
   2   4   3    3.18    0.33  -2
  -2  -4   2    3.18    0.33   1
   1   4  -2    0.91    0.18   1
  -1  -4   2    0.90    0.16   1
  -1  -4   2    0.92    0.17   1
  -1  -4   2    1.12    0.20   1
  -1  -4   2    1.02    0.20   1
  -1  -4   2    0.88    0.18   1
   0   4  -2    1.68    0.19   1
   0  -4   2    1.29    0.22   1
   0  -4   2    1.30    0.20   1
   0  -4   2    1.24    0.24   1
   0  -4   2    1.01    0.18   1
   0  -4   2    1.70    0.22   1
  -1   4  -2    0.68    0.19   1
   1  -4   2    1.06    0.19   1
   1  -4   2    0.09    0.15   1
   1  -4   2    0.72    0.18   1
   1  -4   2    0.91    0.19   1
   2  -4  -2    6.81    0.56  -2
  -2   4  -2    6.81    0.56   1
   2  -4  -2    6.69    0.62  -2
  -2   4  -2    6.69    0.62   1
  -2   4   2    6.44    0.61  -2
   2  -4   2    6.44    0.61   1
  -2   4   2    6.91    0.61  -2
   2  -4   2    6.91    0.61   1
  -3   4  -2    1.29    0.29   1
  -3   4  -2    1.70    0.24   1
   3  -4   2    1.46    0.25   1
   3  -4   2    1.07    0.25   1
  -4   4  -2   -0.08    0.27   1
  -4   4  -2    0.30    0.22   1
   4  -4   2    0.15    0.21   1
   4  -4   2    0.18    0.19   1
   5  -4  -1    0.22    0.31  -2
  -5   4  -2    0.22    0.31   1
   5  -4  -1    0.05    0.26  -2
  -5   4  -2    0.05    0.26   1
  -5   4   1    0.04    0.25  -2
   5  -4   2    0.04    0.25   1
  -6   4  -2    0.51    0.38   1
  -6   4  -2    0.12    0.31   1
   6  -4   2   -0.06    0.26   1
   6  -4   2    0.89    0.28   1
   7   3  -2    0.49    0.24   1
   7   3  -2    0.59    0.27   1
  -7  -3   2    0.88    0.27   1
  -7  -3   2    0.29    0.29   1
  -6  -3  -4    1.72    0.32  -2
   6   3  -2    1.72    0.32   1
  -6  -3  -4    1.23    0.25  -2
   6   3  -2    1.23    0.25   1
   6   3   4    1.26    0.28  -2
  -6  -3   2    1.26    0.28   1
   6   3   4    1.10    0.28  -2
  -6  -3   2    1.10    0.28   1
   6   3   4    1.32    0.27  -2
  -6  -3   2    1.32    0.27   1
   5   3  -2    0.83    0.24   1
   5   3  -2    0.86    0.19   1
  -5  -3   2    0.76    0.24   1
  -5  -3   2    0.43    0.25   1
  -5  -3   2    0.67    0.21   1
   4   3  -2    4.24    0.43   1
   4   3  -2    4.65    0.47   1
  -4  -3   2    4.44    0.46   1
  -4  -3   2    4.60    0.44   1
  -4  -3   2    5.09    0.48   1
   3   3  -2    0.67    0.14   1
  -2  -3  -3   46.39    3.68  -2
   2   3  -2   46.39    3.68   1
  -2  -3  -3   49.10    3.70  -2
   2   3  -2   49.10    3.70   1
  -2  -3  -3   48.70    3.70  -2
   2   3  -2   48.70    3.70   1
   2   3   3   47.42    3.69  -2
  -2  -3   2   47.42    3.69   1
   2   3   3   48.24    3.70  -2
  -2  -3   2   48.24    3.70   1
   2   3   3   47.60    3.68  -2
  -2  -3   2   47.60    3.68   1
   2   3   3   49.26    3.69  -2
  -2  -3   2   49.26    3.69   1
   2   3   3   48.35    3.70  -2
  -2  -3   2   48.35    3.70   1
   1   3  -2   16.07    1.23   1
   1   3  -2   15.90    1.24   1
  -1  -3   2   16.97    1.26   1
  -1  -3   2   15.48    1.25   1
  -1  -3   2   16.08    1.23   1
  -1  -3   2   14.91    1.25   1
   0   3  -2    5.20    0.40   1
   0   3  -2    4.73    0.42   1
   0  -3   2    4.43    0.43   1
   0  -3   2    4.91    0.45   1
   0  -3   2    4.39    0.45   1
   1  -3  -2    0.90    0.16  -2
  -1   3  -2    0.90    0.16   1
   1  -3  -2    0.67    0.20  -2
  -1   3  -2    0.67    0.20   1
  -1   3   2    0.86    0.20  -2
   1  -3   2    0.86    0.20   1
  -1   3   2    0.73    0.17  -2
   1  -3   2    0.73    0.17   1
  -1   3   2    0.89    0.18  -2
   1  -3   2    0.89    0.18   1
  -1   3   2    0.78    0.18  -2
   1  -3   2    0.78    0.18   1
  -2   3  -2    2.15    0.23   1
  -2   3  -2    1.70    0.27   1
   2  -3   2    1.81    0.24   1
   2  -3   2    1.93    0.25   1
   2  -3   2    1.94    0.26   1
   2  -3   2    2.01    0.25   1
  -3   3  -2    4.90    0.47   1
  -3   3  -2    5.35    0.52   1
   3  -3   2    5.08    0.49   1
   3  -3   2    5.20    0.51   1
   3  -3   2    4.79    0.47   1
  -4   3  -2    0.71    0.23   1
  -4   3  -2    0.69    0.28   1
   4  -3   2    0.67    0.22   1
   5  -3  -1    3.75    0.47  -2
  -5   3  -2    3.75    0.47   1
   5  -3  -1    5.05    0.54  -2
  -5   3  -2    5.05    0.54   1
  -5   3   1    4.31    0.46  -2
   5  -3   2    4.31    0.46   1
  -6   3  -2    1.93    0.35   1
  -6   3  -2    1.82    0.41   1
   6  -3   2    1.69    0.31   1
  -7   3  -2    0.66    0.37   1
  -7   3  -2    0.57    0.37   1
   7  -3   2    0.30    0.28   1
   7  -3   2    0.23    0.34   1
   7   2  -2   -0.07    0.20   1
   7   2  -2    0.18    0.23   1
  -7  -2   2    0.19    0.23   1
  -7  -2   2    0.14    0.24   1
  -6  -2  -4    5.15    0.57  -2
   6   2  -2    5.15    0.57   1
  -6  -2  -4    6.27    0.59  -2
   6   2  -2    6.27    0.59   1
   6   2   4    5.83    0.61  -2
  -6  -2   2    5.83    0.61   1
   6   2   4    5.81    0.57  -2
  -6  -2   2    5.81    0.57   1
   6   2   4    6.25    0.63  -2
  -6  -2   2    6.25    0.63   1
   6   2   4    5.78    0.58  -2
  -6  -2   2    5.78    0.58   1
   5   2  -2    0.05    0.15   1
   5   2  -2    0.43    0.22   1
  -5  -2   2    0.25    0.21   1
  -5  -2   2    0.32    0.20   1
  -5  -2   2    0.12    0.17   1
  -5  -2   2    0.40    0.20   1
   4   2  -2    3.29    0.32   1
   4   2  -2    2.97    0.35   1
   4   2  -2    2.61    0.32   1
  -4  -2   2    3.29    0.32   1
  -4  -2   2    3.61    0.34   1
  -4  -2   2    2.73    0.34   1
  -4  -2   2    2.94    0.35   1
  -3  -2  -3    9.01    0.73  -2
   3   2  -2    9.01    0.73   1
  -3  -2  -3    8.98    0.72  -2
   3   2  -2    8.98    0.72   1
  -3  -2  -3    8.88    0.72  -2
   3   2  -2    8.88    0.72   1
  -3  -2  -3    8.35    0.75  -2
   3   2  -2    8.35    0.75   1
  -3  -2  -3    9.31    0.74  -2
   3   2  -2    9.31    0.74   1
   3   2   3    8.56    0.73  -2
  -3  -2   2    8.56    0.73   1
   3   2   3    8.93    0.72  -2
  -3  -2   2    8.93    0.72   1
   3   2   3    8.39    0.74  -2
  -3  -2   2    8.39    0.74   1
   3   2   3    9.10    0.75  -2
  -3  -2   2    9.10    0.75   1
   2   2  -2    0.36    0.14   1
   2   2  -2    0.50    0.16   1
   2   2  -2    0.50    0.11   1
   2   2  -2    0.90    0.17   1
   2   2  -2    0.43    0.12   1
   2   2  -2    0.65    0.12   1
  -2  -2   2    0.51    0.14   1
  -2  -2   2    0.43    0.15   1
  -2  -2   2    0.42    0.13   1
  -2  -2   2    0.53    0.11   1
  -2  -2   2    0.13    0.15   1
   1   2  -2    0.34    0.12   1
   1   2  -2    0.32    0.12   1
   1   2  -2    0.26    0.13   1
  -1  -2   2    0.51    0.12   1
  -1  -2   2    0.44    0.13   1
  -1  -2   2    0.33    0.12   1
   0   2  -2    0.30    0.12   1
   0   2  -2    0.28    0.11   1
   0  -2   2    0.24    0.12   1
   0  -2   2    0.48    0.13   1
   1  -2  -2    7.45    0.63  -2
  -1   2  -2    7.45    0.63   1
   1  -2  -2    7.96    0.63  -2
  -1   2  -2    7.96    0.63   1
   1  -2  -2    7.24    0.64  -2
  -1   2  -2    7.24    0.64   1
  -1   2   2    8.03    0.64  -2
   1  -2   2    8.03    0.64   1
  -1   2   2    7.86    0.63  -2
   1  -2   2    7.86    0.63   1
  -1   2   2    7.96    0.63  -2
   1  -2   2    7.96    0.63   1
  -2   2  -2    4.04    0.40   1
  -2   2  -2    3.33    0.36   1
  -2   2  -2    4.09    0.36   1
   2  -2   2    3.62    0.37   1
   2  -2   2    3.72    0.36   1
   2  -2   2    4.36    0.35   1
   2  -2   2    3.82    0.38   1
   2  -2   2    3.43    0.38   1
  -3   2  -2   -0.10    0.17   1
  -3   2  -2    0.21    0.19   1
   3  -2   2    0.14    0.15   1
   3  -2   2   -0.24    0.14   1
   3  -2   2    0.01    0.15   1
   3  -2   2   -0.03    0.14   1
   3  -2   2   -0.05    0.15   1
   4  -2  -1   -0.13    0.21  -2
  -4   2  -2   -0.13    0.21   1
   4  -2  -1    0.10    0.22  -2
  -4   2  -2    0.10    0.22   1
  -4   2   1    0.02    0.16  -2
   4  -2   2    0.02    0.16   1
  -5   2  -2    1.48    0.27   1
  -5   2  -2    1.46    0.32   1
   5  -2   2    1.28    0.26   1
   5  -2   2    1.28    0.24   1
  -6   2  -2    0.41    0.27   1
  -6   2  -2    0.70    0.32   1
   6  -2   2    0.36    0.24   1
   6  -2   2    0.24    0.20   1
  -7   2  -2    0.99    0.40   1
  -7   2  -2    0.69    0.31   1
   7  -2   2    0.56    0.27   1
   7  -2   2    0.04    0.24   1
  -7  -1  -4    1.37    0.28  -2
   7   1  -2    1.37    0.28   1
  -7  -1  -4    0.98    0.29  -2
   7   1  -2    0.98    0.29   1
   7   1   4    1.46    0.28  -2
  -7  -1   2    1.46    0.28   1
   7   1   4    1.38    0.31  -2
  -7  -1   2    1.38    0.31   1
   6   1  -2    0.69    0.23   1
   6   1  -2    0.62    0.23   1
  -6  -1   2    0.95    0.24   1
  -6  -1   2    0.75    0.23   1
   5   1  -2    3.74    0.40   1
   5   1  -2    3.63    0.39   1
  -5  -1   2    3.42    0.38   1
  -5  -1   2    3.73    0.39   1
  -5  -1   2    3.48    0.41   1
   4   1  -2    2.20    0.23   1
   4   1  -2    1.90    0.22   1
   4   1  -2    1.13    0.19   1
  -4  -1   2    1.17    0.22   1
  -4  -1   2    1.21    0.22   1
  -4  -1   2    1.06    0.23   1
  -4  -1   2    1.24    0.21   1
  -3  -1  -3   40.93    3.17  -2
   3   1  -2   40.93    3.17   1
  -3  -1  -3   41.39    3.16  -2
   3   1  -2   41.39    3.16   1
  -3  -1  -3   42.35    3.16  -2
   3   1  -2   42.35    3.16   1
  -3  -1  -3   40.89    3.16  -2
   3   1  -2   40.89    3.16   1
  -3  -1  -3   41.47    3.17  -2
   3   1  -2   41.47    3.17   1
  -3  -1  -3   41.45    3.16  -2
   3   1  -2   41.45    3.16   1
   3   1   3   42.46    3.17  -2
  -3  -1   2   42.46    3.17   1
   3   1   3   40.06    3.17  -2
  -3  -1   2   40.06    3.17   1
   3   1   3   40.27    3.17  -2
  -3  -1   2   40.27    3.17   1
   3   1   3   38.77    3.16  -2
  -3  -1   2   38.77    3.16   1
   3   1   3   42.92    3.16  -2
  -3  -1   2   42.92    3.16   1
   2   1  -2   10.36    0.81   1
   2   1  -2   10.35    0.82   1
   2   1  -2   10.52    0.81   1
   2   1  -2   10.52    0.82   1
   2   1  -2   10.30    0.82   1
   2   1  -2   10.55    0.81   1
  -2  -1   2   10.02    0.81   1
  -2  -1   2    9.89    0.82   1
  -2  -1   2    9.74    0.81   1
  -2  -1   2   10.53    0.82   1
  -2  -1   2   10.50    0.82   1
  -2  -1   2   10.21    0.82   1
   1   1  -2    3.02    0.29   1
   1   1  -2    2.91    0.29   1
   1   1  -2    3.32    0.28   1
   1   1  -2    3.22    0.27   1
   1   1  -2    3.20    0.27   1
  -1  -1   2    2.88    0.28   1
  -1  -1   2    2.73    0.28   1
  -1  -1   2    3.07    0.28   1
  -1  -1   2    3.03    0.30   1
  -1  -1   2    3.27    0.30   1
  -1  -1   2    3.14    0.27   1
   0  -1  -2    0.78    0.11  -2
   0   1  -2    0.78    0.11   1
   0  -1  -2    0.62    0.10  -2
   0   1  -2    0.62    0.10   1
   0  -1  -2    0.69    0.11  -2
   0   1  -2    0.69    0.11   1
   0  -1  -2    0.90    0.10  -2
   0   1  -2    0.90    0.10   1
   0   1   2    0.77    0.10  -2
   0  -1   2    0.77    0.10   1
   0   1   2    0.65    0.12  -2
   0  -1   2    0.65    0.12   1
   0   1   2    0.80    0.10  -2
   0  -1   2    0.80    0.10   1
   0   1   2    0.88    0.11  -2
   0  -1   2    0.88    0.11   1
  -1   1  -2    5.01    0.35   1
  -1   1  -2    3.73    0.36   1
  -1   1  -2    4.44    0.37   1
  -1   1  -2    4.23    0.36   1
  -1   1  -2    4.26    0.38   1
   1  -1   2    4.12    0.37   1
   1  -1   2    4.28    0.36   1
   1  -1   2    4.05    0.37   1
   1  -1   2    4.30    0.38   1
  -2   1  -2    5.60    0.50   1
  -2   1  -2    6.32    0.51   1
  -2   1  -2    6.29    0.50   1
   2  -1   2    6.42    0.52   1
   2  -1   2    5.99    0.51   1
   2  -1   2    5.82    0.49   1
   2  -1   2    6.70    0.51   1
  -3   1  -2    0.77    0.15   1
  -3   1  -2    1.02    0.22   1
  -3   1  -2    0.87    0.20   1
   3  -1   2    1.04    0.20   1
   3  -1   2    0.94    0.17   1
   3  -1   2    0.75    0.17   1
   3  -1   2    0.88    0.18   1
   3  -1   2    0.86    0.18   1
   4  -1  -1   15.34    1.16  -2
  -4   1  -2   15.34    1.16   1
   4  -1  -1   14.82    1.17  -2
  -4   1  -2   14.82    1.17   1
  -4   1   1   13.81    1.15  -2
   4  -1   2   13.81    1.15   1
  -4   1   1   13.59    1.15  -2
   4  -1   2   13.59    1.15   1
  -4   1   1   14.61    1.14  -2
   4  -1   2   14.61    1.14   1
  -5   1  -2    4.07    0.42   1
  -5   1  -2    4.44    0.46   1
   5  -1   2    3.89    0.41   1
   5  -1   2    3.85    0.39   1
   5  -1   2    3.91    0.40   1
  -6   1  -2    1.67    0.36   1
  -6   1  -2    1.63    0.30   1
   6  -1   2    1.08    0.24   1
   6  -1   2    0.91    0.23   1
   7  -1   0    0.53    0.31  -2
  -7   1  -2    0.53    0.31   1
   7  -1   0    0.03    0.26  -2
  -7   1  -2    0.03    0.26   1
  -7   1   0    0.02    0.19  -2
   7  -1   2    0.02    0.19   1
  -7   1   0    0.07    0.17  -2
   7  -1   2    0.07    0.17   1
  -7   0  -4    1.62    0.30  -2
   7   0  -2    1.62    0.30   1
  -7   0  -4    1.43    0.31  -2
   7   0  -2    1.43    0.31   1
   7   0   4    2.50    0.38  -2
  -7   0   2    2.50    0.38   1
   7   0   4    2.18    0.36  -2
  -7   0   2    2.18    0.36   1
   6   0  -2    0.10    0.21   1
   6   0  -2    0.08    0.19   1
  -6   0   2    0.20    0.25   1
  -6   0   2    0.41    0.23   1
   5   0  -2    0.76    0.21   1
   5   0  -2    1.35    0.23   1
  -5   0   2    0.63    0.24   1
  -5   0   2    0.88    0.26   1
  -4   0  -3    2.99    0.36  -2
   4   0  -2    2.99    0.36   1
  -4   0  -3    3.25    0.37  -2
   4   0  -2    3.25    0.37   1
  -4   0  -3    3.66    0.39  -2
   4   0  -2    3.66    0.39   1
  -4   0  -3    4.07    0.36  -2
   4   0  -2    4.07    0.36   1
   4   0   3    3.57    0.40  -2
  -4   0   2    3.57    0.40   1
   4   0   3    4.02    0.37  -2
  -4   0   2    4.02    0.37   1
   4   0   3    3.94    0.40  -2
  -4   0   2    3.94    0.40   1
   3   0  -2    2.03    0.24   1
   3   0  -2    2.23    0.24   1
   3   0  -2    2.49    0.25   1
   3   0  -2    1.48    0.21   1
   3   0  -2    2.14    0.24   1
  -3   0   2    1.95    0.24   1
  -3   0   2    1.53    0.24   1
  -3   0   2    1.94    0.26   1
  -3   0   2    1.92    0.25   1
   2   0  -2    0.61    0.12   1
   2   0  -2    0.48    0.11   1
   2   0  -2    0.78    0.13   1
   2   0  -2    0.57    0.13   1
   2   0  -2    0.74    0.13   1
  -2   0   2    0.50    0.15   1
  -2   0   2    0.70    0.15   1
  -2   0   2    0.54    0.14   1
  -2   0   2    0.56    0.14   1
   1   0  -2    3.31    0.25   1
   1   0  -2    3.01    0.26   1
   1   0  -2    2.80    0.24   1
   1   0  -2    2.85    0.25   1
   1   0  -2    2.39    0.25   1
  -1   0   2    2.67    0.25   1
  -1   0   2    2.58    0.25   1
  -1   0   2    2.51    0.26   1
  -1   0   2    2.71    0.26   1
  -1   0   2    2.97    0.26   1
   0   0  -2    8.77    0.64  -2
   0   0  -2    8.77    0.64   1
   0   0  -2    8.05    0.64  -2
   0   0  -2    8.05    0.64   1
   0   0  -2    8.23    0.64  -2
   0   0  -2    8.23    0.64   1
   0   0  -2    8.75    0.65  -2
   0   0  -2    8.75    0.65   1
   0   0   2    7.83    0.64  -2
   0   0   2    7.83    0.64   1
   0   0   2    8.52    0.64  -2
   0   0   2    8.52    0.64   1
   0   0   2    8.07    0.64  -2
   0   0   2    8.07    0.64   1
   0   0   2    8.14    0.65  -2
   0   0   2    8.14    0.65   1
  -1   0  -2    0.10    0.08   1
  -1   0  -2    0.58    0.09   1
  -1   0  -2    0.42    0.10   1
  -1   0  -2    0.42    0.10   1
  -1   0  -2    0.58    0.12   1
  -1   0  -2    0.51    0.09   1
   1   0   2    0.39    0.10   1
   1   0   2    0.51    0.10   1
   1   0   2    0.37    0.08   1
   1   0   2    0.50    0.08   1
   1   0   2    0.49    0.11   1
   1   0   2    0.41    0.09   1
   1   0   2    0.45    0.09   1
  -2   0  -2   -0.04    0.15   1
  -2   0  -2    0.00    0.10   1
  -2   0  -2    0.03    0.08   1
  -2   0  -2   -0.11    0.11   1
  -2   0  -2    0.13    0.10   1
   2   0   2   -0.10    0.11   1
   2   0   2    0.13    0.09   1
   2   0   2    0.00    0.11   1
   2   0   2   -0.11    0.14   1
   2   0   2    0.06    0.10   1
  -3   0  -2    1.39    0.16   1
  -3   0  -2    0.90    0.20   1
  -3   0  -2    1.51    0.24   1
  -3   0  -2    1.29    0.19   1
   3   0   2    1.39    0.20   1
   3   0   2    1.38    0.21   1
   3   0   2    1.25    0.19   1
   3   0   2    1.47    0.22   1
   3   0   2    1.28    0.18   1
   3   0   2    1.32    0.17   1
   3   0   2    1.44    0.22   1
   4   0  -1    2.15    0.30  -2
  -4   0  -2    2.15    0.30   1
   4   0  -1    3.96    0.34  -2
  -4   0  -2    3.96    0.34   1
   4   0  -1    3.91    0.38  -2
  -4   0  -2    3.91    0.38   1
  -4   0   1    2.56    0.31  -2
   4   0   2    2.56    0.31   1
  -4   0   1    3.70    0.35  -2
   4   0   2    3.70    0.35   1
  -4   0   1    3.38    0.32  -2
   4   0   2    3.38    0.32   1
  -4   0   1    2.34    0.31  -2
   4   0   2    2.34    0.31   1
  -5   0  -2    0.70    0.22   1
  -5   0  -2    0.79    0.25   1
  -5   0  -2    0.47    0.20   1
   5   0   2    0.46    0.19   1
   5   0   2    0.51    0.17   1
  -6   0  -2   -0.13    0.22   1
  -6   0  -2    0.16    0.25   1
   6   0   2    0.02    0.18   1
   6   0   2   -0.16    0.15   1
   7   0   0    0.01    0.29  -2
  -7   0  -2    0.01    0.29   1
   7   0   0    0.27    0.25  -2
  -7   0  -2    0.27    0.25   1
  -7   0   0    0.32    0.21  -2
   7   0   2    0.32    0.21   1
  -7   0   0    0.09    0.19  -2
   7   0   2    0.09    0.19   1
   8   0   2    0.00    0.22   1
  -7   1  -4    0.81    0.22  -2
   7  -1  -2    0.81    0.22   1
  -7   1  -4    1.02    0.21  -2
   7  -1  -2    1.02    0.21   1
   7  -1   4    0.52    0.29  -2
  -7   1   2    0.52    0.29   1
   7  -1   4    0.95    0.34  -2
  -7   1   2    0.95    0.34   1
   6  -1  -2    1.57    0.23   1
   6  -1  -2    1.12    0.21   1
  -6   1   2    1.37    0.35   1
  -6   1   2    1.21    0.32   1
   5  -1  -2    0.83    0.20   1
   5  -1  -2    0.51    0.17   1
   5  -1  -2    0.38    0.20   1
  -5   1   2    0.73    0.27   1
  -5   1   2    0.54    0.19   1
  -5   1   2    1.10    0.26   1
  -4   1  -3    7.60    0.79  -2
   4  -1  -2    7.60    0.79   1
  -4   1  -3   10.06    0.79  -2
   4  -1  -2   10.06    0.79   1
  -4   1  -3   10.22    0.79  -2
   4  -1  -2   10.22    0.79   1
  -4   1  -3    9.17    0.79  -2
   4  -1  -2    9.17    0.79   1
   4  -1   3   10.04    0.78  -2
  -4   1   2   10.04    0.78   1
   4  -1   3    9.84    0.81  -2
  -4   1   2    9.84    0.81   1
   4  -1   3   10.31    0.82  -2
  -4   1   2   10.31    0.82   1
   3  -1  -2    2.35    0.24   1
   3  -1  -2    2.04    0.25   1
   3  -1  -2    1.98    0.23   1
   3  -1  -2    2.00    0.24   1
  -3   1   2    1.94    0.24   1
  -3   1   2    1.71    0.26   1
  -3   1   2    1.81    0.28   1
   2  -1  -2    3.47    0.32   1
   2  -1  -2    3.53    0.31   1
   2  -1  -2    3.44    0.32   1
  -2   1   2    2.92    0.34   1
  -2   1   2    3.14    0.31   1
  -2   1   2    3.20    0.32   1
   1  -1  -2    5.77    0.47   1
   1  -1  -2    5.21    0.47   1
   1  -1  -2    6.48    0.46   1
   1  -1  -2    5.93    0.47   1
  -1   1   2    5.12    0.48   1
  -1   1   2    5.10    0.48   1
  -1   1   2    6.51    0.47   1
  -1   1   2    5.02    0.49   1
   0   1  -2    1.45    0.16  -2
   0  -1  -2    1.45    0.16   1
   0   1  -2    1.18    0.14  -2
   0  -1  -2    1.18    0.14   1
   0   1  -2    1.23    0.14  -2
   0  -1  -2    1.23    0.14   1
   0   1  -2    1.33    0.13  -2
   0  -1  -2    1.33    0.13   1
   0   1  -2    1.18    0.13  -2
   0  -1  -2    1.18    0.13   1
   0  -1   2    1.56    0.15  -2
   0   1   2    1.56    0.15   1
   0  -1   2    1.16    0.15  -2
   0   1   2    1.16    0.15   1
   0  -1   2    1.17    0.14  -2
   0   1   2    1.17    0.14   1
   0  -1   2    1.15    0.13  -2
   0   1   2    1.15    0.13   1
  -1  -1  -2    8.26    0.63   1
  -1  -1  -2    7.79    0.63   1
  -1  -1  -2    7.84    0.62   1
  -1  -1  -2    7.73    0.63   1
  -1  -1  -2    8.26    0.63   1
  -1  -1  -2    7.77    0.63   1
   1   1   2    8.02    0.63   1
   1   1   2    7.56    0.63   1
   1   1   2    9.10    0.64   1
   1   1   2    7.88    0.63   1
   1   1   2    8.18    0.64   1
   1   1   2    7.72    0.63   1
   1   1   2    7.97    0.63   1
  -2  -1  -2    0.82    0.12   1
  -2  -1  -2    0.63    0.11   1
  -2  -1  -2    0.41    0.13   1
  -2  -1  -2    0.38    0.12   1
   2   1   2    0.75    0.13   1
   2   1   2    0.65    0.14   1
   2   1   2    0.49    0.13   1
   2   1   2    0.72    0.13   1
   2   1   2    0.57    0.11   1
   2   1   2    0.54    0.12   1
   2   1   2    0.71    0.16   1
   3   1  -1   29.17    2.20  -2
  -3  -1  -2   29.17    2.20   1
   3   1  -1   27.76    2.19  -2
  -3  -1  -2   27.76    2.19   1
   3   1  -1   28.74    2.20  -2
  -3  -1  -2   28.74    2.20   1
   3   1  -1   28.46    2.18  -2
  -3  -1  -2   28.46    2.18   1
  -3  -1   1   27.61    2.19  -2
   3   1   2   27.61    2.19   1
  -3  -1   1   27.97    2.19  -2
   3   1   2   27.97    2.19   1
  -3  -1   1   29.32    2.21  -2
   3   1   2   29.32    2.21   1
  -3  -1   1   28.86    2.19  -2
   3   1   2   28.86    2.19   1
  -3  -1   1   29.53    2.20  -2
   3   1   2   29.53    2.20   1
  -3  -1   1   26.40    2.20  -2
   3   1   2   26.40    2.20   1
  -3  -1   1   28.65    2.19  -2
   3   1   2   28.65    2.19   1
  -4  -1  -2    5.63    0.53   1
  -4  -1  -2    5.39    0.52   1
  -4  -1  -2    5.62    0.52   1
   4   1   2    5.69    0.51   1
   4   1   2    6.01    0.51   1
   4   1   2    6.09    0.50   1
   4   1   2    6.04    0.52   1
  -5  -1  -2    0.99    0.24   1
  -5  -1  -2    1.06    0.24   1
  -5  -1  -2    0.89    0.22   1
   5   1   2    1.08    0.22   1
   5   1   2    1.39    0.22   1
   5   1   2    1.08    0.19   1
  -6  -1  -2    1.65    0.28   1
  -6  -1  -2    1.44    0.30   1
  -6  -1  -2    1.15    0.26   1
   6   1   2    1.13    0.26   1
   6   1   2    1.49    0.25   1
   6   1   2    1.47    0.23   1
   7   1   0    2.46    0.35  -2
  -7  -1  -2    2.46    0.35   1
   7   1   0    2.30    0.35  -2
  -7  -1  -2    2.30    0.35   1
   7   1   0    1.65    0.35  -2
  -7  -1  -2    1.65    0.35   1
  -7  -1   0    2.03    0.29  -2
   7   1   2    2.03    0.29   1
  -7  -1   0    2.40    0.34  -2
   7   1   2    2.40    0.34   1
   8   1   2   -0.08    0.24   1
   7  -2  -2    0.21    0.23   1
   7  -2  -2    0.16    0.19   1
  -7   2   2   -0.03    0.38   1
  -7   2   2    0.33    0.30   1
   6  -2  -2   -0.14    0.20   1
  -6   2   2    0.31    0.35   1
  -6   2   2    0.49    0.29   1
   5  -2  -2    0.27    0.19   1
  -5   2   2    0.59    0.26   1
  -5   2   2    0.25    0.29   1
  -4   2  -3    1.25    0.22  -2
   4  -2  -2    1.25    0.22   1
  -4   2  -3    1.28    0.21  -2
   4  -2  -2    1.28    0.21   1
  -4   2  -3    1.18    0.24  -2
   4  -2  -2    1.18    0.24   1
   4  -2   3    1.39    0.25  -2
  -4   2   2    1.39    0.25   1
   4  -2   3    1.62    0.29  -2
  -4   2   2    1.62    0.29   1
   3  -2  -2    0.72    0.18   1
   3  -2  -2    0.59    0.19   1
   3  -2  -2    0.57    0.16   1
   3  -2  -2    0.31    0.16   1
  -3   2   2    0.86    0.22   1
  -3   2   2    0.78    0.18   1
  -3   2   2    0.85    0.19   1
   2  -2  -2    7.07    0.60   1
   2  -2  -2    6.56    0.60   1
   2  -2  -2    7.50    0.58   1
   2  -2  -2    6.59    0.61   1
  -2   2   2    7.73    0.60   1
  -2   2   2    6.43    0.62   1
  -2   2   2    7.41    0.60   1
  -2   2   2    6.74    0.60   1
  -1   2  -2   11.56    0.86  -2
   1  -2  -2   11.56    0.86   1
  -1   2  -2   11.07    0.87  -2
   1  -2  -2   11.07    0.87   1
  -1   2  -2   10.46    0.87  -2
   1  -2  -2   10.46    0.87   1
   1  -2   2   10.63    0.88  -2
  -1   2   2   10.63    0.88   1
   1  -2   2   11.18    0.87  -2
  -1   2   2   11.18    0.87   1
   1  -2   2   11.07    0.88  -2
  -1   2   2   11.07    0.88   1
   1  -2   2   10.58    0.88  -2
  -1   2   2   10.58    0.88   1
   0  -2  -2    0.88    0.14   1
   0  -2  -2    0.96    0.14   1
   0  -2  -2    1.04    0.14   1
   0   2   2    0.65    0.15   1
   0   2   2    0.49    0.15   1
   0   2   2    0.69    0.15   1
  -1  -2  -2    1.32    0.16   1
  -1  -2  -2    0.99    0.14   1
  -1  -2  -2    1.29    0.15   1
  -1  -2  -2    1.00    0.13   1
  -1  -2  -2    0.95    0.14   1
   1   2   2    1.03    0.16   1
   1   2   2    0.98    0.15   1
   1   2   2    1.02    0.16   1
   1   2   2    1.06    0.15   1
  -2  -2  -2    1.28    0.16   1
  -2  -2  -2    1.36    0.18   1
   2   2   2    1.19    0.19   1
   2   2   2    1.51    0.17   1
   3   2  -1    4.38    0.39  -2
  -3  -2  -2    4.38    0.39   1
   3   2  -1    4.64    0.44  -2
  -3  -2  -2    4.64    0.44   1
   3   2  -1    4.56    0.43  -2
  -3  -2  -2    4.56    0.43   1
   3   2  -1    4.19    0.40  -2
  -3  -2  -2    4.19    0.40   1
  -3  -2   1    5.24    0.40  -2
   3   2   2    5.24    0.40   1
  -3  -2   1    4.27    0.41  -2
   3   2   2    4.27    0.41   1
  -3  -2   1    4.65    0.43  -2
   3   2   2    4.65    0.43   1
  -3  -2   1    4.13    0.41  -2
   3   2   2    4.13    0.41   1
  -3  -2   1    4.16    0.43  -2
   3   2   2    4.16    0.43   1
  -4  -2  -2    0.12    0.11   1
  -4  -2  -2    0.17    0.18   1
  -4  -2  -2    0.09    0.16   1
   4   2   2    0.10    0.14   1
   4   2   2    0.24    0.14   1
   4   2   2    0.22    0.12   1
   4   2   2   -0.01    0.16   1
  -5  -2  -2    0.55    0.20   1
   5   2   2    0.27    0.18   1
   5   2   2    0.42    0.20   1
   6   2   0    0.93    0.27  -2
  -6  -2  -2    0.93    0.27   1
  -6  -2   0    0.56    0.21  -2
   6   2   2    0.56    0.21   1
  -6  -2   0    1.04    0.24  -2
   6   2   2    1.04    0.24   1
  -7  -2  -2    0.66    0.27   1
   7   2   2    0.67    0.27   1
   7   2   2    0.51    0.22   1
   8   2   2    0.07    0.24   1
   7  -3  -2   -0.08    0.26   1
   7  -3  -2   -0.25    0.22   1
  -7   3   2   -0.20    0.36   1
   6  -3  -2    0.56    0.26   1
  -6   3   2    0.37    0.33   1
  -6   3   2    1.12    0.38   1
  -5   3  -3    2.21    0.32  -2
   5  -3  -2    2.21    0.32   1
   5  -3   3    2.68    0.36  -2
  -5   3   2    2.68    0.36   1
   5  -3   3    2.01    0.39  -2
  -5   3   2    2.01    0.39   1
   4  -3  -2    0.38    0.18   1
   4  -3  -2    0.61    0.19   1
  -4   3   2    0.10    0.21   1
  -4   3   2    0.06    0.25   1
  -4   3   2    0.42    0.23   1
   3  -3  -2    3.51    0.40   1
   3  -3  -2    4.57    0.43   1
  -3   3   2    3.87    0.42   1
  -3   3   2    4.13    0.41   1
  -3   3   2    3.88    0.44   1
   2  -3  -2    2.19    0.27   1
   2  -3  -2    2.30    0.26   1
   2  -3  -2    1.98    0.27   1
   2  -3  -2    2.01    0.27   1
  -2   3   2    3.16    0.29   1
  -2   3   2    2.13    0.30   1
  -2   3   2    1.63    0.27   1
  -1   3  -2    0.44    0.16  -2
   1  -3  -2    0.44    0.16   1
  -1   3  -2    0.50    0.17  -2
   1  -3  -2    0.50    0.17   1
  -1   3  -2    0.30    0.16  -2
   1  -3  -2    0.30    0.16   1
   1  -3   2    0.26    0.18  -2
  -1   3   2    0.26    0.18   1
   1  -3   2    1.16    0.21  -2
  -1   3   2    1.16    0.21   1
   1  -3   2    0.52    0.18  -2
  -1   3   2    0.52    0.18   1
   0  -3  -2    9.49    0.72   1
   0  -3  -2    8.97    0.73   1
   0  -3  -2   10.15    0.71   1
   0   3   2    8.00    0.72   1
   0   3   2    8.19    0.72   1
   0   3   2    7.53    0.72   1
  -1  -3  -2    0.41    0.14   1
  -1  -3  -2   -0.11    0.14   1
  -1  -3  -2    0.28    0.13   1
  -1  -3  -2    0.05    0.13   1
   1   3   2    0.20    0.14   1
   1   3   2    0.23    0.16   1
   1   3   2    0.11    0.16   1
   2   3  -1   15.34    1.20  -2
  -2  -3  -2   15.34    1.20   1
   2   3  -1   14.67    1.19  -2
  -2  -3  -2   14.67    1.19   1
   2   3  -1   15.73    1.20  -2
  -2  -3  -2   15.73    1.20   1
   2   3  -1   16.86    1.21  -2
  -2  -3  -2   16.86    1.21   1
   2   3  -1   14.81    1.19  -2
  -2  -3  -2   14.81    1.19   1
  -2  -3   1   15.31    1.21  -2
   2   3   2   15.31    1.21   1
  -2  -3   1   15.28    1.20  -2
   2   3   2   15.28    1.20   1
  -2  -3   1   15.64    1.22  -2
   2   3   2   15.64    1.22   1
  -2  -3   1   13.72    1.21  -2
   2   3   2   13.72    1.21   1
  -3  -3  -2    3.29    0.30   1
  -3  -3  -2    3.57    0.36   1
  -3  -3  -2    3.47    0.34   1
   3   3   2    3.11    0.34   1
   3   3   2    3.18    0.33   1
   3   3   2    3.06    0.34   1
   3   3   2    2.89    0.33   1
  -4  -3  -2   -0.07    0.18   1
  -4  -3  -2    0.03    0.17   1
   4   3   2    0.15    0.15   1
   4   3   2    0.32    0.13   1
  -5  -3  -2    8.88    0.76   1
  -5  -3  -2    8.35    0.76   1
   5   3   2    9.15    0.77   1
   5   3   2    7.57    0.73   1
   6   3   0    3.15    0.38  -2
  -6  -3  -2    3.15    0.38   1
  -6  -3   0    2.25    0.34  -2
   6   3   2    2.25    0.34   1
  -6  -3   0    3.35    0.40  -2
   6   3   2    3.35    0.40   1
  -7  -3  -2    0.38    0.28   1
   7   3   2   -0.01    0.20   1
   7   3   2    0.26    0.26   1
   6  -4  -2    0.17    0.26   1
  -6   4   2    0.24    0.32   1
  -6   4   2    0.10    0.34   1
  -5   4  -3    0.52    0.25  -2
   5  -4  -2    0.52    0.25   1
   5  -4   3    0.47    0.33  -2
  -5   4   2    0.47    0.33   1
   5  -4   3    0.63    0.29  -2
  -5   4   2    0.63    0.29   1
   4  -4  -2    0.03    0.21   1
  -4   4   2    0.28    0.28   1
  -4   4   2   -0.03    0.24   1
   3  -4  -2    2.36    0.30   1
  -3   4   2    1.91    0.32   1
  -3   4   2    2.28    0.33   1
  -3   4   2    2.17    0.29   1
  -2   4  -2    8.17    0.71  -2
   2  -4  -2    8.17    0.71   1
   2  -4   2    8.64    0.76  -2
  -2   4   2    8.64    0.76   1
   2  -4   2    8.84    0.75  -2
  -2   4   2    8.84    0.75   1
   2  -4   2    9.09    0.74  -2
  -2   4   2    9.09    0.74   1
   1  -4  -2    0.23    0.14   1
   1  -4  -2    0.26    0.15   1
  -1   4   2    0.69    0.19   1
  -1   4   2    0.51    0.20   1
  -1   4   2    0.51    0.19   1
   0  -4  -2    1.21    0.20   1
   0  -4  -2    1.43    0.19   1
   0  -4  -2    1.18    0.22   1
   0   4   2    1.36    0.25   1
   0   4   2    1.00    0.22   1
   0   4   2    0.95    0.23   1
  -1  -4  -2    0.61    0.15   1
  -1  -4  -2    0.44    0.16   1
  -1  -4  -2    0.47    0.18   1
  -1  -4  -2    0.85    0.17   1
   1   4   2    0.02    0.16   1
   1   4   2    0.21    0.18   1
   1   4   2   -0.16    0.17   1
   2   4  -1    1.44    0.22  -2
  -2  -4  -2    1.44    0.22   1
   2   4  -1    1.47    0.18  -2
  -2  -4  -2    1.47    0.18   1
   2   4  -1    1.56    0.23  -2
  -2  -4  -2    1.56    0.23   1
   2   4  -1    1.54    0.22  -2
  -2  -4  -2    1.54    0.22   1
  -2  -4   1    1.15    0.21  -2
   2   4   2    1.15    0.21   1
  -2  -4   1    1.18    0.22  -2
   2   4   2    1.18    0.22   1
  -2  -4   1    1.89    0.24  -2
   2   4   2    1.89    0.24   1
  -3  -4  -2    0.30    0.17   1
  -3  -4  -2    0.49    0.19   1
  -3  -4  -2    0.28    0.17   1
  -3  -4  -2    0.21    0.12   1
   3   4   2    0.29    0.15   1
   3   4   2    0.19    0.18   1
   3   4   2    0.30    0.16   1
  -4  -4  -2    1.66    0.27   1
  -4  -4  -2    1.77    0.28   1
   5   4   0    3.80    0.44  -2
  -5  -4  -2    3.80    0.44   1
   5   4   0    3.35    0.40  -2
  -5  -4  -2    3.35    0.40   1
  -5  -4   0    3.34    0.46  -2
   5   4   2    3.34    0.46   1
  -6  -4  -2    1.40    0.31   1
  -6  -4  -2    1.23    0.29   1
   6   4   2    1.39    0.33   1
   6   4   2    0.96    0.24   1
  -7  -4  -2    0.69    0.30   1
   7   4   2    0.37    0.31   1
   7   4   2    0.06    0.20   1
  -6   5  -3    0.61    0.32  -2
   6  -5  -2    0.61    0.32   1
   6  -5   3    0.37    0.40  -2
  -6   5   2    0.37    0.40   1
   6  -5   3    0.27    0.34  -2
  -6   5   2    0.27    0.34   1
   5  -5  -2   -0.07    0.23   1
   5  -5  -2    0.35    0.29   1
  -5   5   2    0.31    0.34   1
  -5   5   2   -0.19    0.28   1
   4  -5  -2    3.43    0.39   1
   4  -5  -2    3.14    0.37   1
  -4   5   2    2.99    0.46   1
  -4   5   2    3.03    0.37   1
   3  -5  -2    0.63    0.24   1
  -3   5   2    0.37    0.27   1
  -3   5   2    0.33    0.22   1
  -3   5   2    0.22    0.27   1
  -2   5  -2    1.81    0.24  -2
   2  -5  -2    1.81    0.24   1
   2  -5   2    0.88    0.26  -2
  -2   5   2    0.88    0.26   1
   2  -5   2    0.62    0.24  -2
  -2   5   2    0.62    0.24   1
   2  -5   2    1.09    0.26  -2
  -2   5   2    1.09    0.26   1
   1  -5  -2    5.14    0.43   1
  -1   5   2    4.10    0.46   1
  -1   5   2    4.54    0.48   1
  -1   5   2    4.53    0.49   1
   0  -5  -2    0.50    0.16   1
   0   5   2    0.26    0.16   1
   0   5   2    0.18    0.20   1
   0   5   2    0.74    0.20   1
   1   5  -1    3.06    0.33  -2
  -1  -5  -2    3.06    0.33   1
   1   5  -1    3.61    0.36  -2
  -1  -5  -2    3.61    0.36   1
  -1  -5   1    2.87    0.36  -2
   1   5   2    2.87    0.36   1
  -1  -5   1    3.23    0.35  -2
   1   5   2    3.23    0.35   1
  -2  -5  -2    0.89    0.20   1
  -2  -5  -2    1.23    0.22   1
  -2  -5  -2    0.71    0.17   1
   2   5   2    0.74    0.22   1
   2   5   2    0.36    0.17   1
  -3  -5  -2    0.92    0.23   1
  -3  -5  -2    0.68    0.16   1
  -3  -5  -2    0.86    0.22   1
   3   5   2    0.80    0.19   1
  -4  -5  -2   16.26    1.43   1
  -4  -5  -2   17.68    1.43   1
  -4  -5  -2   18.99    1.40   1
   5   5   0    2.66    0.36  -2
  -5  -5  -2    2.66    0.36   1
   5   5   0    2.96    0.41  -2
  -5  -5  -2    2.96    0.41   1
  -5  -5   0    2.56    0.44  -2
   5   5   2    2.56    0.44   1
  -6  -5  -2    0.61    0.29   1
  -6  -5  -2    0.65    0.25   1
   6   5   2    0.52    0.34   1
  -7  -5  -2    0.70    0.35   1
   7   5   2    0.40    0.34   1
   5  -6  -2    0.10    0.27   1
   5  -6  -2    0.42    0.30   1
  -5   6   2   -0.24    0.29   1
  -5   6   2   -0.27    0.32   1
   4  -6  -2    0.28    0.27   1
   4  -6  -2    0.53    0.26   1
  -4   6   2    0.76    0.27   1
  -4   6   2    0.49    0.35   1
  -3   6  -2    5.49    0.58  -2
   3  -6  -2    5.49    0.58   1
  -3   6  -2    5.45    0.56  -2
   3  -6  -2    5.45    0.56   1
   3  -6   2    5.25    0.61  -2
  -3   6   2    5.25    0.61   1
   3  -6   2    5.61    0.54  -2
  -3   6   2    5.61    0.54   1
   2  -6  -2    0.67    0.23   1
  -2   6   2    0.45    0.27   1
  -2   6   2    0.44    0.26   1
   1  -6  -2    0.59    0.21   1
   1  -6  -2    0.68    0.19   1
  -1   6   2    0.56    0.25   1
  -1   6   2    0.67    0.24   1
   0  -6  -2    0.73    0.20   1
   0  -6  -2    0.82    0.21   1
   0   6   2    0.47    0.22   1
   0   6   2    0.42    0.24   1
   1   6  -1    0.09    0.18  -2
  -1  -6  -2    0.09    0.18   1
   1   6  -1    0.21    0.19  -2
  -1  -6  -2    0.21    0.19   1
   1   6  -1    0.27    0.18  -2
  -1  -6  -2    0.27    0.18   1
  -1  -6   1    0.32    0.22  -2
   1   6   2    0.32    0.22   1
  -1  -6   1   -0.01    0.22  -2
   1   6   2   -0.01    0.22   1
  -2  -6  -2    0.76    0.18   1
  -2  -6  -2    0.81    0.23   1
  -2  -6  -2    0.91    0.24   1
   2   6   2    0.75    0.27   1
   2   6   2    0.39    0.20   1
  -3  -6  -2    1.52    0.28   1
  -3  -6  -2    1.32    0.25   1
  -3  -6  -2    1.14    0.25   1
   3   6   2    0.91    0.21   1
   4   6   0    4.78    0.52  -2
  -4  -6  -2    4.78    0.52   1
   4   6   0    4.92    0.51  -2
  -4  -6  -2    4.92    0.51   1
   4   6   0    4.23    0.48  -2
  -4  -6  -2    4.23    0.48   1
  -5  -6  -2    1.24    0.31   1
  -5  -6  -2    1.65    0.32   1
   5   6   2    1.37    0.36   1
  -6  -6  -2    0.36    0.29   1
  -6  -6  -2    0.93    0.29   1
   6   6   2    0.56    0.37   1
   4  -7  -2    0.46    0.33   1
   4  -7  -2    0.17    0.29   1
  -4   7   2    0.36    0.34   1
  -4   7   2    0.17    0.28   1
  -3   7  -2    1.29    0.27  -2
   3  -7  -2    1.29    0.27   1
   3  -7   2    0.80    0.32  -2
  -3   7   2    0.80    0.32   1
   3  -7   2    0.60    0.28  -2
  -3   7   2    0.60    0.28   1
   2  -7  -2    1.40    0.32   1
   2  -7  -2    1.38    0.30   1
  -2   7   2    1.38    0.34   1
   1  -7  -2    0.86    0.22   1
   1  -7  -2    0.58    0.25   1
  -1   7   2    0.23    0.25   1
   0   7  -1    0.23    0.21  -2
   0  -7  -2    0.23    0.21   1
   0   7  -1    0.39    0.23  -2
   0  -7  -2    0.39    0.23   1
   0  -7   1    0.43    0.25  -2
   0   7   2    0.43    0.25   1
  -1  -7  -2    0.80    0.24   1
  -1  -7  -2    0.55    0.24   1
  -1  -7  -2    0.56    0.25   1
  -1  -7  -2    0.63    0.20   1
   1   7   2    0.60    0.24   1
  -2  -7  -2    1.39    0.29   1
  -2  -7  -2    1.54    0.30   1
  -2  -7  -2    1.05    0.28   1
  -2  -7  -2    1.71    0.24   1
  -3  -7  -2   15.50    1.21   1
  -3  -7  -2   15.89    1.19   1
  -3  -7  -2   15.25    1.20   1
   3   7   2   11.31    1.17   1
   4   7   0    2.38    0.38  -2
  -4  -7  -2    2.38    0.38   1
   4   7   0    2.43    0.35  -2
  -4  -7  -2    2.43    0.35   1
   4   7   0    2.87    0.40  -2
  -4  -7  -2    2.87    0.40   1
  -5  -7  -2    0.49    0.23   1
  -5  -7  -2    0.22    0.26   1
  -5  -7  -2    0.09    0.26   1
   5   7   2   -0.01    0.31   1
  -6  -7  -2    0.57    0.32   1
  -6  -7  -2    0.39    0.30   1
   6   7   2    0.62    0.40   1
   3  -8  -2    0.36    0.30   1
   3  -8  -2    0.47    0.32   1
  -3   8   2    0.43    0.31   1
  -3   8   2   -0.08    0.32   1
   2  -8  -2    0.97    0.31   1
   2  -8  -2    0.66    0.27   1
  -2   8   2    0.10    0.34   1
   1  -8  -2    0.55    0.26   1
   1  -8  -2    0.43    0.27   1
   1  -8  -2    0.13    0.21   1
  -1   8   2    0.47    0.27   1
   0   8  -1   -0.15    0.19  -2
   0  -8  -2   -0.15    0.19   1
   0   8  -1   -0.08    0.27  -2
   0  -8  -2   -0.08    0.27   1
   0   8  -1    0.09    0.23  -2
   0  -8  -2    0.09    0.23   1
   0  -8   1    0.05    0.24  -2
   0   8   2    0.05    0.24   1
  -1  -8  -2    0.10    0.24   1
  -1  -8  -2    0.52    0.27   1
  -1  -8  -2    0.59    0.24   1
  -1  -8  -2    0.78    0.25   1
   1   8   2    0.24    0.25   1
  -2  -8  -2    0.56    0.25   1
  -2  -8  -2    0.43    0.25   1
  -2  -8  -2    0.09    0.23   1
  -2  -8  -2    0.54    0.24   1
   3   8   0    2.79    0.39  -2
  -3  -8  -2    2.79    0.39   1
   3   8   0    2.78    0.40  -2
  -3  -8  -2    2.78    0.40   1
   3   8   0    2.79    0.39  -2
  -3  -8  -2    2.79    0.39   1
   4   8   0    1.11    0.32  -2
  -4  -8  -2    1.11    0.32   1
   4   8   0    0.63    0.29  -2
  -4  -8  -2    0.63    0.29   1
   4   8   0    1.05    0.31  -2
  -4  -8  -2    1.05    0.31   1
  -5  -8  -2    0.55    0.31   1
  -5  -8  -2   -0.13    0.14   1
  -5  -8  -2    0.56    0.32   1
   5   8   2    0.21    0.34   1
  -1   9  -1    0.28    0.31  -2
   1  -9  -2    0.28    0.31   1
  -1   9  -1    0.34    0.30  -2
   1  -9  -2    0.34    0.30   1
   1  -9   1    0.24    0.33  -2
  -1   9   2    0.24    0.33   1
   0   9  -1    0.41    0.27  -2
   0  -9  -2    0.41    0.27   1
   0   9  -1    0.50    0.28  -2
   0  -9  -2    0.50    0.28   1
   0   9  -1    0.18    0.25  -2
   0  -9  -2    0.18    0.25   1
   0  -9   1    0.59    0.30  -2
   0   9   2    0.59    0.30   1
  -1  -9  -2    0.75    0.30   1
  -1  -9  -2    0.44    0.16   1
  -1  -9  -2    0.96    0.29   1
  -1  -9  -2    0.82    0.31   1
   1   9   2    0.40    0.22   1
  -2  -9  -2    5.86    0.65   1
  -2  -9  -2    7.64    0.71   1
  -2  -9  -2    7.31    0.71   1
  -2  -9  -2    7.08    0.73   1
   3   9   0    1.39    0.36  -2
  -3  -9  -2    1.39    0.36   1
   3   9   0    1.53    0.36  -2
  -3  -9  -2    1.53    0.36   1
   3   9   0    1.90    0.36  -2
  -3  -9  -2    1.90    0.36   1
  -3  -9  -5    0.00    0.34  -2
   3   9  -3    0.00    0.34   1
   3   9   5   -0.51    0.29  -2
  -3  -9   3   -0.51    0.29   1
   3   9   5   -0.03    0.26  -2
  -3  -9   3   -0.03    0.26   1
   3   9   5    0.11    0.32  -2
  -3  -9   3    0.11    0.32   1
   2   9  -3   -0.25    0.30   1
  -2  -9   3    0.18    0.29   1
  -2  -9   3    0.67    0.31   1
  -2  -9   3    0.50    0.32   1
   1   9  -3    0.62    0.32   1
  -1  -9   3    0.15    0.23   1
  -1  -9   3    0.47    0.32   1
  -1  -9   3    0.30    0.28   1
  -1  -9   3    0.59    0.28   1
   0  -9  -4    0.02    0.28  -2
   0   9  -3    0.02    0.28   1
   0   9   4    0.22    0.31  -2
   0  -9   3    0.22    0.31   1
   0   9   4    0.01    0.24  -2
   0  -9   3    0.01    0.24   1
  -1   9   4    0.93    0.38  -2
   1  -9   3    0.93    0.38   1
  -1   9   4    1.00    0.30  -2
   1  -9   3    1.00    0.30   1
  -4  -8  -5    0.16    0.33  -2
   4   8  -3    0.16    0.33   1
   4   8   5    0.51    0.25  -2
  -4  -8   3    0.51    0.25   1
   4   8   5   -0.11    0.29  -2
  -4  -8   3   -0.11    0.29   1
   4   8   5   -0.05    0.26  -2
  -4  -8   3   -0.05    0.26   1
  -3  -8  -5    8.67    0.86  -2
   3   8  -3    8.67    0.86   1
   3   8   5   10.24    0.85  -2
  -3  -8   3   10.24    0.85   1
   3   8   5    8.05    0.82  -2
  -3  -8   3    8.05    0.82   1
   3   8   5    8.89    0.84  -2
  -3  -8   3    8.89    0.84   1
   2   8  -3    0.40    0.30   1
  -2  -8   3    0.87    0.27   1
  -2  -8   3    0.29    0.23   1
  -2  -8   3   -0.14    0.23   1
  -2  -8   3    0.63    0.28   1
   1   8  -3    0.89    0.29   1
  -1  -8   3    0.47    0.24   1
  -1  -8   3    0.88    0.24   1
  -1  -8   3    0.37    0.25   1
  -1  -8   3    0.28    0.29   1
   0  -8  -4    0.48    0.26  -2
   0   8  -3    0.48    0.26   1
   0   8   4    0.33    0.23  -2
   0  -8   3    0.33    0.23   1
   0   8   4    0.79    0.29  -2
   0  -8   3    0.79    0.29   1
  -1   8  -3    0.08    0.28   1
   1  -8   3    0.15    0.25   1
   1  -8   3    0.16    0.26   1
  -2   8  -3    0.21    0.31   1
   2  -8   3    0.35    0.32   1
   2  -8   3   -0.03    0.28   1
  -3   8  -3    0.85    0.39   1
   3  -8   3    0.36    0.36   1
   3  -8   3   -0.18    0.31   1
   5   7  -3    0.20    0.35   1
  -5  -7   3    0.76    0.27   1
  -5  -7   3    0.71    0.33   1
  -5  -7   3    0.71    0.25   1
  -4  -7  -5    0.50    0.31  -2
   4   7  -3    0.50    0.31   1
   4   7   5    0.16    0.23  -2
  -4  -7   3    0.16    0.23   1
   4   7   5   -0.09    0.26  -2
  -4  -7   3   -0.09    0.26   1
   4   7   5   -0.01    0.23  -2
  -4  -7   3   -0.01    0.23   1
   3   7  -3    0.61    0.29   1
  -3  -7   3    0.66    0.24   1
  -3  -7   3    0.31    0.24   1
  -3  -7   3    0.44    0.26   1
   2   7  -3    1.51    0.33   1
  -2  -7   3    1.08    0.27   1
  -2  -7   3    1.13    0.28   1
  -2  -7   3    1.12    0.28   1
  -1  -7   3    0.06    0.21   1
  -1  -7   3   -0.04    0.20   1
  -1  -7   3   -0.13    0.22   1
  -1  -7   3   -0.32    0.22   1
   0   7   4    2.53    0.31  -2
   0  -7   3    2.53    0.31   1
   0   7   4    1.31    0.26  -2
   0  -7   3    1.31    0.26   1
  -1   7  -3    0.99    0.28   1
   1  -7   3    0.52    0.24   1
   1  -7   3    0.94    0.24   1
  -2   7  -3    0.21    0.28   1
   2  -7   3    0.26    0.26   1
   2  -7   3    0.27    0.25   1
   3  -7  -3    0.33    0.33  -2
  -3   7  -3    0.33    0.33   1
  -3   7   3    0.34    0.27  -2
   3  -7   3    0.34    0.27   1
  -3   7   3   -0.25    0.26  -2
   3  -7   3   -0.25    0.26   1
  -4   7  -3    3.72    0.57   1
   4  -7   3    4.69    0.52   1
   4  -7   3    3.80    0.54   1
   6   6  -3   -0.25    0.32   1
  -6  -6   3    0.20    0.28   1
  -6  -6   3    0.16    0.24   1
   5   6  -3    0.54    0.31   1
  -5  -6   3    0.76    0.30   1
  -5  -6   3    0.45    0.25   1
  -4  -6  -5   25.12    2.04  -2
   4   6  -3   25.12    2.04   1
   4   6   5   26.09    2.03  -2
  -4  -6   3   26.09    2.03   1
   4   6   5   23.80    2.02  -2
  -4  -6   3   23.80    2.02   1
   4   6   5   26.58    2.00  -2
  -4  -6   3   26.58    2.00   1
   3   6  -3    0.34    0.27   1
  -3  -6   3    0.76    0.21   1
  -3  -6   3    0.55    0.21   1
  -3  -6   3    0.16    0.24   1
   2   6  -3    0.61    0.25   1
  -2  -6   3    0.17    0.23   1
  -2  -6   3    0.63    0.23   1
  -2  -6   3    0.34    0.21   1
  -1  -6  -4    1.14    0.26  -2
   1   6  -3    1.14    0.26   1
   1   6   4    1.44    0.25  -2
  -1  -6   3    1.44    0.25   1
   1   6   4    1.18    0.23  -2
  -1  -6   3    1.18    0.23   1
   1   6   4    1.34    0.21  -2
  -1  -6   3    1.34    0.21   1
   0  -6   3    0.59    0.19   1
   0  -6   3    0.71    0.18   1
   0  -6   3    0.47    0.21   1
  -1   6  -3    1.96    0.29   1
   1  -6   3    1.66    0.27   1
   1  -6   3    1.34    0.26   1
  -2   6  -3    0.64    0.27   1
   2  -6   3    0.30    0.22   1
   2  -6   3    0.21    0.21   1
   3  -6  -3    5.11    0.61  -2
  -3   6  -3    5.11    0.61   1
  -3   6   3    5.24    0.56  -2
   3  -6   3    5.24    0.56   1
  -3   6   3    6.08    0.59  -2
   3  -6   3    6.08    0.59   1
  -4   6  -3    0.19    0.34   1
  -4   6  -3    0.23    0.31   1
   4  -6   3    0.20    0.28   1
   4  -6   3    0.60    0.32   1
  -5   6  -3    0.66    0.34   1
  -5   6  -3    0.37    0.37   1
   5  -6   3    0.33    0.35   1
   5  -6   3    0.19    0.30   1
   7   5  -3    0.04    0.32   1
  -7  -5   3   -0.11    0.22   1
  -7  -5   3   -0.31    0.27   1
   6   5  -3    0.27    0.29   1
  -6  -5   3    0.42    0.27   1
  -6  -5   3    0.32    0.25   1
  -5  -5  -5    2.21    0.37  -2
   5   5  -3    2.21    0.37   1
   5   5   5    1.56    0.35  -2
  -5  -5   3    1.56    0.35   1
   5   5   5    1.53    0.30  -2
  -5  -5   3    1.53    0.30   1
   4   5  -3    2.16    0.34   1
  -4  -5   3    1.47    0.24   1
  -4  -5   3    2.04    0.33   1
  -4  -5   3    2.04    0.29   1
   3   5  -3    2.18    0.26   1
   3   5  -3    2.92    0.35   1
  -3  -5   3    2.33    0.30   1
  -3  -5   3    2.77    0.35   1
  -3  -5   3    2.51    0.33   1
   2   5  -3    0.20    0.20   1
  -2  -5   3    0.26    0.19   1
  -2  -5   3    0.20    0.19   1
  -2  -5   3    0.08    0.17   1
  -1  -5  -4    4.09    0.43  -2
   1   5  -3    4.09    0.43   1
  -1  -5  -4    5.22    0.47  -2
   1   5  -3    5.22    0.47   1
   1   5   4    4.05    0.45  -2
  -1  -5   3    4.05    0.45   1
   1   5   4    4.94    0.46  -2
  -1  -5   3    4.94    0.46   1
   1   5   4    4.48    0.43  -2
  -1  -5   3    4.48    0.43   1
   1   5   4    5.19    0.43  -2
  -1  -5   3    5.19    0.43   1
   0  -5   3    1.58    0.23   1
   0  -5   3    1.49    0.23   1
  -1   5  -3    2.10    0.25   1
   1  -5   3    1.45    0.25   1
   1  -5   3    1.53    0.25   1
   2  -5  -3    1.47    0.29  -2
  -2   5  -3    1.47    0.29   1
  -2   5   3    1.52    0.25  -2
   2  -5   3    1.52    0.25   1
  -2   5   3    1.27    0.25  -2
   2  -5   3    1.27    0.25   1
  -3   5  -3   16.37    1.41   1
  -3   5  -3   17.51    1.36   1
   3  -5   3   17.71    1.39   1
   3  -5   3   16.73    1.38   1
  -4   5  -3    0.87    0.34   1
  -4   5  -3    0.73    0.26   1
   4  -5   3    0.72    0.24   1
   4  -5   3    0.66    0.25   1
  -5   5  -3    0.13    0.32   1
  -5   5  -3   -0.03    0.35   1
   5  -5   3    0.05    0.29   1
   5  -5   3    0.13    0.24   1
   6  -5  -2    0.29    0.36  -2
  -6   5  -3    0.29    0.36   1
   6  -5  -2    0.13    0.40  -2
  -6   5  -3    0.13    0.40   1
  -6   5   2   -0.09    0.36  -2
   6  -5   3   -0.09    0.36   1
  -6   5   2    0.23    0.29  -2
   6  -5   3    0.23    0.29   1
   7   4  -3   -0.20    0.31   1
   7   4  -3   -0.21    0.22   1
  -7  -4   3    0.08    0.27   1
  -7  -4   3   -0.17    0.29   1
   6   4  -3    0.86    0.29   1
   6   4  -3    0.58    0.22   1
  -6  -4   3    0.58    0.29   1
  -6  -4   3    0.73    0.26   1
  -5  -4  -5   44.62    3.36  -2
   5   4  -3   44.62    3.36   1
   5   4   5   41.87    3.36  -2
  -5  -4   3   41.87    3.36   1
   5   4   5   42.99    3.37  -2
  -5  -4   3   42.99    3.37   1
   4   4  -3    1.03    0.27   1
  -4  -4   3    0.67    0.21   1
  -4  -4   3    0.63    0.23   1
   3   4  -3    0.30    0.19   1
   3   4  -3    0.37    0.12   1
  -3  -4   3    0.33    0.15   1
  -3  -4   3    0.07    0.19   1
  -3  -4   3    0.55    0.18   1
  -2  -4  -4    1.89    0.25  -2
   2   4  -3    1.89    0.25   1
  -2  -4  -4    1.96    0.27  -2
   2   4  -3    1.96    0.27   1
   2   4   4    1.93    0.25  -2
  -2  -4   3    1.93    0.25   1
   2   4   4    1.52    0.24  -2
  -2  -4   3    1.52    0.24   1
   2   4   4    1.78    0.26  -2
  -2  -4   3    1.78    0.26   1
   2   4   4    1.64    0.25  -2
  -2  -4   3    1.64    0.25   1
   1   4  -3    1.36    0.18   1
   1   4  -3    1.59    0.21   1
   1   4  -3    1.24    0.24   1
  -1  -4   3    1.32    0.22   1
  -1  -4   3    1.81    0.18   1
  -1  -4   3    0.83    0.21   1
  -1  -4   3    1.73    0.22   1
  -1  -4   3    1.68    0.20   1
   0   4  -3    7.82    0.60   1
   0   4  -3    7.00    0.59   1
   0  -4   3    6.33    0.62   1
   0  -4   3    7.31    0.62   1
   0  -4   3    7.09    0.61   1
  -1   4  -3   -0.01    0.11   1
  -1   4  -3    0.08    0.17   1
   1  -4   3    0.04    0.16   1
   1  -4   3   -0.11    0.16   1
   1  -4   3    0.13    0.17   1
   2  -4  -3   19.68    1.56  -2
  -2   4  -3   19.68    1.56   1
  -2   4   3   19.75    1.54  -2
   2  -4   3   19.75    1.54   1
  -2   4   3   19.30    1.55  -2
   2  -4   3   19.30    1.55   1
  -3   4  -3    3.49    0.44   1
  -3   4  -3    4.37    0.40   1
   3  -4   3    4.17    0.44   1
   3  -4   3    3.55    0.39   1
  -4   4  -3    0.67    0.23   1
  -4   4  -3    0.37    0.29   1
   4  -4   3    0.61    0.24   1
   4  -4   3    0.40    0.22   1
   5  -4  -2    1.62    0.37  -2
  -5   4  -3    1.62    0.37   1
   5  -4  -2    1.54    0.32  -2
  -5   4  -3    1.54    0.32   1
  -5   4   2    1.12    0.31  -2
   5  -4   3    1.12    0.31   1
  -6   4  -3   -0.02    0.36   1
  -6   4  -3    0.02    0.29   1
   6  -4   3   -0.08    0.29   1
   6  -4   3   -0.49    0.28   1
   7   3  -3    0.00    0.23   1
   7   3  -3   -0.24    0.27   1
  -7  -3   3    0.14    0.28   1
  -7  -3   3    0.22    0.24   1
  -6  -3  -5    1.84    0.30  -2
   6   3  -3    1.84    0.30   1
  -6  -3  -5    2.24    0.35  -2
   6   3  -3    2.24    0.35   1
   6   3   5    1.99    0.34  -2
  -6  -3   3    1.99    0.34   1
   6   3   5    2.46    0.36  -2
  -6  -3   3    2.46    0.36   1
   6   3   5    2.23    0.32  -2
  -6  -3   3    2.23    0.32   1
   5   3  -3    2.36    0.32   1
   5   3  -3    3.08    0.37   1
  -5  -3   3    3.01    0.32   1
  -5  -3   3    1.97    0.34   1
  -5  -3   3    2.34    0.35   1
   4   3  -3    3.18    0.33   1
   4   3  -3    3.36    0.38   1
  -4  -3   3    2.95    0.35   1
  -4  -3   3    2.97    0.37   1
  -4  -3   3    2.87    0.33   1
   3   3  -3    1.27    0.17   1
   3   3  -3    1.38    0.23   1
  -3  -3   3    1.00    0.23   1
  -3  -3   3    1.19    0.19   1
  -3  -3   3    1.36    0.23   1
  -3  -3   3    0.92    0.17   1
  -2  -3  -4    9.96    0.80  -2
   2   3  -3    9.96    0.80   1
  -2  -3  -4    9.95    0.81  -2
   2   3  -3    9.95    0.81   1
  -2  -3  -4    9.52    0.78  -2
   2   3  -3    9.52    0.78   1
  -2  -3  -4    9.75    0.82  -2
   2   3  -3    9.75    0.82   1
   2   3   4    9.93    0.82  -2
  -2  -3   3    9.93    0.82   1
   2   3   4   10.26    0.80  -2
  -2  -3   3   10.26    0.80   1
   2   3   4   10.09    0.82  -2
  -2  -3   3   10.09    0.82   1
   2   3   4    9.62    0.80  -2
  -2  -3   3    9.62    0.80   1
   1   3  -3    6.36    0.53   1
   1   3  -3    6.65    0.51   1
   1   3  -3    6.37    0.54   1
   1   3  -3    6.39    0.53   1
  -1  -3   3    5.80    0.54   1
  -1  -3   3    5.74    0.54   1
  -1  -3   3    5.99    0.51   1
   0   3  -3    6.16    0.55   1
   0   3  -3    6.48    0.54   1
   0   3  -3    6.52    0.55   1
   0  -3   3    6.65    0.56   1
   0  -3   3    6.62    0.55   1
   1  -3  -3   11.06    0.90  -2
  -1   3  -3   11.06    0.90   1
   1  -3  -3   10.04    0.91  -2
  -1   3  -3   10.04    0.91   1
   1  -3  -3   11.59    0.91  -2
  -1   3  -3   11.59    0.91   1
  -1   3   3   11.60    0.91  -2
   1  -3   3   11.60    0.91   1
  -1   3   3   11.27    0.90  -2
   1  -3   3   11.27    0.90   1
  -1   3   3   12.06    0.91  -2
   1  -3   3   12.06    0.91   1
  -2   3  -3   54.96    4.22   1
  -2   3  -3   53.70    4.23   1
  -2   3  -3   55.76    4.24   1
   2  -3   3   53.14    4.23   1
   2  -3   3   58.69    4.24   1
   2  -3   3   55.96    4.23   1
   2  -3   3   54.41    4.23   1
  -3   3  -3    0.25    0.22   1
  -3   3  -3    0.43    0.18   1
   3  -3   3    0.41    0.18   1
   3  -3   3    0.46    0.18   1
   3  -3   3    0.38    0.18   1
  -4   3  -3    0.96    0.25   1
  -4   3  -3    1.26    0.31   1
   4  -3   3    0.71    0.17   1
   4  -3   3    0.60    0.21   1
   4  -3   3    0.79    0.20   1
   5  -3  -2    1.37    0.31  -2
  -5   3  -3    1.37    0.31   1
   5  -3  -2    1.98    0.37  -2
  -5   3  -3    1.98    0.37   1
  -5   3   2    1.82    0.29  -2
   5  -3   3    1.82    0.29   1
  -5   3   2    1.37    0.28  -2
   5  -3   3    1.37    0.28   1
  -6   3  -3    0.61    0.35   1
  -6   3  -3    0.78    0.30   1
   6  -3   3    0.69    0.31   1
   6  -3   3    0.22    0.24   1
  -7   3  -3    0.57    0.33   1
  -7   3  -3    0.14    0.36   1
   7  -3   3    0.25    0.31   1
   7  -3   3    0.24    0.32   1
   7   2  -3    0.69    0.26   1
   7   2  -3    0.71    0.27   1
  -7  -2   3    0.82    0.25   1
  -7  -2   3    0.63    0.25   1
  -6  -2  -5   36.78    2.92  -2
   6   2  -3   36.78    2.92   1
  -6  -2  -5   37.46    2.92  -2
   6   2  -3   37.46    2.92   1
   6   2   5   37.32    2.92  -2
  -6  -2   3   37.32    2.92   1
   6   2   5   38.67    2.93  -2
  -6  -2   3   38.67    2.93   1
   6   2   5   37.01    2.91  -2
  -6  -2   3   37.01    2.91   1
   5   2  -3    0.98    0.22   1
   5   2  -3    0.63    0.23   1
  -5  -2   3    0.84    0.23   1
  -5  -2   3    0.72    0.20   1
  -5  -2   3    0.81    0.25   1
  -5  -2   3    0.92    0.22   1
   4   2  -3    0.35    0.19   1
   4   2  -3    0.15    0.13   1
   4   2  -3    0.65    0.16   1
  -4  -2   3    0.29    0.17   1
  -4  -2   3    0.17    0.17   1
  -4  -2   3    0.10    0.15   1
  -4  -2   3    0.30    0.19   1
  -3  -2  -4    0.90    0.18  -2
   3   2  -3    0.90    0.18   1
  -3  -2  -4    0.75    0.21  -2
   3   2  -3    0.75    0.21   1
  -3  -2  -4    1.08    0.21  -2
   3   2  -3    1.08    0.21   1
  -3  -2  -4    0.92    0.16  -2
   3   2  -3    0.92    0.16   1
  -3  -2  -4    0.63    0.14  -2
   3   2  -3    0.63    0.14   1
   3   2   4    0.70    0.18  -2
  -3  -2   3    0.70    0.18   1
   3   2   4    0.64    0.17  -2
  -3  -2   3    0.64    0.17   1
   3   2   4    0.61    0.20  -2
  -3  -2   3    0.61    0.20   1
   3   2   4    0.46    0.14  -2
  -3  -2   3    0.46    0.14   1
   1   2  -3   14.71    1.17   1
   1   2  -3   14.87    1.16   1
   1   2  -3   15.02    1.16   1
  -1  -2   3   14.77    1.16   1
  -1  -2   3   15.09    1.17   1
  -1  -2   3   14.84    1.17   1
   0   2  -3    3.40    0.30   1
   0   2  -3    2.97    0.30   1
   0   2  -3    3.08    0.31   1
   0  -2   3    3.35    0.31   1
   0  -2   3    3.28    0.32   1
   1  -2  -3   28.97    2.24  -2
  -1   2  -3   28.97    2.24   1
   1  -2  -3   28.24    2.24  -2
  -1   2  -3   28.24    2.24   1
   1  -2  -3   29.09    2.23  -2
  -1   2  -3   29.09    2.23   1
  -1   2   3   29.08    2.23  -2
   1  -2   3   29.08    2.23   1
  -1   2   3   28.95    2.24  -2
   1  -2   3   28.95    2.24   1
  -1   2   3   30.05    2.24  -2
   1  -2   3   30.05    2.24   1
  -2   2  -3   15.52    1.23   1
  -2   2  -3   14.73    1.23   1
  -2   2  -3   15.99    1.23   1
  -2   2  -3   15.62    1.25   1
  -2   2  -3   16.02    1.23   1
   2  -2   3   15.86    1.24   1
   2  -2   3   15.51    1.23   1
   2  -2   3   16.75    1.22   1
   2  -2   3   15.45    1.24   1
  -3   2  -3    0.08    0.14   1
  -3   2  -3    0.30    0.20   1
  -3   2  -3    0.27    0.17   1
  -3   2  -3    0.18    0.14   1
   3  -2   3    0.11    0.13   1
   3  -2   3    0.08    0.15   1
   3  -2   3    0.18    0.15   1
   3  -2   3    0.30    0.16   1
   3  -2   3    0.07    0.14   1
   4  -2  -2    2.26    0.32  -2
  -4   2  -3    2.26    0.32   1
   4  -2  -2    2.21    0.27  -2
  -4   2  -3    2.21    0.27   1
  -4   2   2    2.62    0.27  -2
   4  -2   3    2.62    0.27   1
  -4   2   2    1.47    0.22  -2
   4  -2   3    1.47    0.22   1
  -4   2   2    2.30    0.27  -2
   4  -2   3    2.30    0.27   1
  -5   2  -3    0.42    0.27   1
  -5   2  -3    0.22    0.25   1
   5  -2   3    0.29    0.23   1
   5  -2   3    0.34    0.18   1
  -6   2  -3   -0.19    0.30   1
  -6   2  -3    0.25    0.26   1
   6  -2   3   -0.22    0.20   1
   6  -2   3   -0.33    0.22   1
  -7   2  -3    0.57    0.32   1
  -7   2  -3    0.98    0.38   1
   7  -2   3    0.42    0.26   1
   7  -2   3   -0.09    0.26   1
  -7  -1  -5    0.76    0.26  -2
   7   1  -3    0.76    0.26   1
  -7  -1  -5    1.32    0.28  -2
   7   1  -3    1.32    0.28   1
   7   1   5    1.19    0.29  -2
  -7  -1   3    1.19    0.29   1
   7   1   5    0.89    0.29  -2
  -7  -1   3    0.89    0.29   1
   6   1  -3    1.09    0.27   1
   6   1  -3    0.81    0.25   1
  -6  -1   3    1.19    0.26   1
  -6  -1   3    0.91    0.25   1
   5   1  -3    2.37    0.30   1
   5   1  -3    2.21    0.28   1
  -5  -1   3    1.69    0.28   1
  -5  -1   3    2.20    0.29   1
  -5  -1   3    1.68    0.31   1
   4   1  -3    3.03    0.32   1
   4   1  -3    3.03    0.33   1
   4   1  -3    2.42    0.30   1
  -4  -1   3    3.21    0.33   1
  -4  -1   3    3.23    0.34   1
  -4  -1   3    2.84    0.33   1
  -3  -1  -4    8.71    0.69  -2
   3   1  -3    8.71    0.69   1
  -3  -1  -4    9.05    0.70  -2
   3   1  -3    9.05    0.70   1
  -3  -1  -4    7.87    0.67  -2
   3   1  -3    7.87    0.67   1
  -3  -1  -4    8.22    0.67  -2
   3   1  -3    8.22    0.67   1
  -3  -1  -4    8.18    0.68  -2
   3   1  -3    8.18    0.68   1
  -3  -1  -4    8.41    0.70  -2
   3   1  -3    8.41    0.70   1
   3   1   4    9.05    0.70  -2
  -3  -1   3    9.05    0.70   1
   3   1   4    8.09    0.68  -2
  -3  -1   3    8.09    0.68   1
   3   1   4    7.44    0.69  -2
  -3  -1   3    7.44    0.69   1
   3   1   4    8.58    0.69  -2
  -3  -1   3    8.58    0.69   1
   3   1   4    7.09    0.70  -2
  -3  -1   3    7.09    0.70   1
   2   1  -3    5.57    0.46   1
   2   1  -3    5.33    0.46   1
   2   1  -3    5.84    0.44   1
   2   1  -3    5.07    0.44   1
   2   1  -3    5.46    0.46   1
  -2  -1   3    4.98    0.44   1
  -2  -1   3    5.39    0.46   1
  -2  -1   3    5.49    0.46   1
  -2  -1   3    4.69    0.46   1
  -2  -1   3    5.05    0.47   1
   1   1  -3    8.25    0.64   1
   1   1  -3    8.62    0.64   1
   1   1  -3    8.00    0.65   1
   1   1  -3    8.42    0.65   1
   1   1  -3    7.92    0.63   1
   1   1  -3    8.19    0.63   1
  -1  -1   3    7.48    0.65   1
  -1  -1   3    8.00    0.65   1
  -1  -1   3    8.24    0.64   1
  -1  -1   3    7.85    0.63   1
  -1  -1   3    7.90    0.63   1
  -1  -1   3    8.08    0.65   1
   0  -1  -3   82.72    6.23  -2
   0   1  -3   82.72    6.23   1
   0  -1  -3   79.72    6.22  -2
   0   1  -3   79.72    6.22   1
   0  -1  -3   82.60    6.23  -2
   0   1  -3   82.60    6.23   1
   0  -1  -3   81.90    6.23  -2
   0   1  -3   81.90    6.23   1
   0   1   3   81.80    6.23  -2
   0  -1   3   81.80    6.23   1
   0   1   3   81.79    6.23  -2
   0  -1   3   81.79    6.23   1
   0   1   3   80.24    6.23  -2
   0  -1   3   80.24    6.23   1
   0   1   3   83.76    6.23  -2
   0  -1   3   83.76    6.23   1
  -1   1  -3  123.82    9.40   1
  -1   1  -3  125.20    9.40   1
  -1   1  -3  120.78    9.41   1
   1  -1   3  125.82    9.41   1
   1  -1   3  127.71    9.41   1
   1  -1   3  127.12    9.41   1
   1  -1   3  114.84    9.40   1
  -2   1  -3    0.28    0.15   1
  -2   1  -3    0.44    0.11   1
  -2   1  -3    0.18    0.12   1
  -2   1  -3    0.28    0.13   1
  -2   1  -3    0.54    0.12   1
   2  -1   3    0.49    0.11   1
   2  -1   3    0.52    0.15   1
   2  -1   3    0.46    0.12   1
   2  -1   3    0.36    0.13   1
   2  -1   3    0.41    0.15   1
   2  -1   3    0.35    0.14   1
  -3   1  -3    1.04    0.20   1
  -3   1  -3    1.29    0.21   1
  -3   1  -3    1.33    0.23   1
  -3   1  -3    1.10    0.17   1
   3  -1   3    1.66    0.22   1
   3  -1   3    1.46    0.19   1
   3  -1   3    1.52    0.23   1
   3  -1   3    1.37    0.20   1
   3  -1   3    1.18    0.20   1
   4  -1  -2    9.00    0.72  -2
  -4   1  -3    9.00    0.72   1
   4  -1  -2    9.11    0.74  -2
  -4   1  -3    9.11    0.74   1
   4  -1  -2    8.54    0.71  -2
  -4   1  -3    8.54    0.71   1
  -4   1   2    8.48    0.72  -2
   4  -1   3    8.48    0.72   1
  -4   1   2    8.33    0.71  -2
   4  -1   3    8.33    0.71   1
  -4   1   2    8.06    0.71  -2
   4  -1   3    8.06    0.71   1
  -5   1  -3    1.96    0.32   1
  -5   1  -3    1.86    0.28   1
   5  -1   3    1.53    0.25   1
   5  -1   3    1.32    0.21   1
  -6   1  -3    1.21    0.30   1
  -6   1  -3    1.84    0.35   1
   6  -1   3    1.33    0.26   1
   6  -1   3    1.35    0.23   1
   7  -1  -1    1.62    0.38  -2
  -7   1  -3    1.62    0.38   1
   7  -1  -1    0.80    0.29  -2
  -7   1  -3    0.80    0.29   1
  -7   1   1    1.37    0.25  -2
   7  -1   3    1.37    0.25   1
  -7   1   1    1.43    0.29  -2
   7  -1   3    1.43    0.29   1
  -7   1   1    1.11    0.24  -2
   7  -1   3    1.11    0.24   1
  -7   0  -5   17.10    1.42  -2
   7   0  -3   17.10    1.42   1
  -7   0  -5   14.45    1.42  -2
   7   0  -3   14.45    1.42   1
   7   0   5   18.95    1.45  -2
  -7   0   3   18.95    1.45   1
   7   0   5   19.46    1.45  -2
  -7   0   3   19.46    1.45   1
   6   0  -3    0.63    0.25   1
   6   0  -3    0.43    0.21   1
  -6   0   3    0.82    0.27   1
  -6   0   3    0.61    0.27   1
   5   0  -3    0.35    0.20   1
   5   0  -3    0.24    0.17   1
  -5   0   3    0.11    0.23   1
  -5   0   3    0.21    0.23   1
  -4   0  -4    0.13    0.17  -2
   4   0  -3    0.13    0.17   1
  -4   0  -4    0.13    0.14  -2
   4   0  -3    0.13    0.14   1
  -4   0  -4    0.20    0.16  -2
   4   0  -3    0.20    0.16   1
   4   0   4   -0.15    0.21  -2
  -4   0   3   -0.15    0.21   1
   4   0   4    0.27    0.19  -2
  -4   0   3    0.27    0.19   1
   4   0   4    0.16    0.17  -2
  -4   0   3    0.16    0.17   1
   4   0   4    0.26    0.20  -2
  -4   0   3    0.26    0.20   1
   3   0  -3    2.83    0.30   1
   3   0  -3    2.70    0.29   1
   3   0  -3    2.46    0.29   1
   3   0  -3    3.03    0.31   1
   3   0  -3    2.37    0.26   1
  -3   0   3    2.18    0.29   1
  -3   0   3    2.82    0.30   1
  -3   0   3    2.37    0.29   1
  -3   0   3    2.73    0.30   1
   2   0  -3    5.70    0.46   1
   2   0  -3    5.44    0.47   1
   2   0  -3    6.06    0.47   1
   2   0  -3    5.46    0.45   1
   2   0  -3    5.67    0.47   1
   2   0  -3    5.70    0.46   1
  -2   0   3    5.56    0.48   1
  -2   0   3    5.35    0.48   1
  -2   0   3    5.17    0.47   1
  -2   0   3    5.43    0.48   1
   1   0  -3   24.84    1.92   1
   1   0  -3   27.73    1.93   1
   1   0  -3   25.48    1.92   1
   1   0  -3   26.95    1.92   1
  -1   0   3   23.76    1.92   1
  -1   0   3   24.11    1.92   1
  -1   0   3   26.35    1.92   1
  -1   0   3   24.40    1.92   1
  -1   0   3   22.36    1.93   1
   0   0  -3    0.00    0.08  -2
   0   0  -3    0.00    0.08   1
   0   0  -3   -0.10    0.08  -2
   0   0  -3   -0.10    0.08   1
   0   0  -3    0.05    0.08  -2
   0   0  -3    0.05    0.08   1
   0   0  -3    0.13    0.08  -2
   0   0  -3    0.13    0.08   1
   0   0   3    0.12    0.09  -2
   0   0   3    0.12    0.09   1
   0   0   3    0.05    0.09  -2
   0   0   3    0.05    0.09   1
   0   0   3    0.11    0.09  -2
   0   0   3    0.11    0.09   1
   0   0   3    0.09    0.09  -2
   0   0   3    0.09    0.09   1
  -1   0  -3   19.49    1.43   1
  -1   0  -3   20.11    1.44   1
  -1   0  -3   18.56    1.44   1
  -1   0  -3   19.95    1.44   1
  -1   0  -3   18.42    1.44   1
   1   0   3   18.05    1.44   1
   1   0   3   17.95    1.44   1
   1   0   3   16.66    1.44   1
   1   0   3   18.67    1.44   1
   1   0   3   19.01    1.44   1
  -2   0  -3    7.68    0.57   1
  -2   0  -3    6.64    0.56   1
  -2   0  -3    6.68    0.55   1
  -2   0  -3    6.31    0.55   1
  -2   0  -3    6.81    0.57   1
  -2   0  -3    6.91    0.56   1
   2   0   3    6.85    0.55   1
   2   0   3    7.43    0.55   1
   2   0   3    6.74    0.57   1
   2   0   3    7.26    0.56   1
   2   0   3    6.44    0.56   1
   2   0   3    6.10    0.56   1
  -3   0  -3    1.78    0.19   1
  -3   0  -3    1.78    0.21   1
  -3   0  -3    1.71    0.23   1
  -3   0  -3    2.04    0.26   1
   3   0   3    1.68    0.20   1
   3   0   3    1.61    0.22   1
   3   0   3    1.79    0.22   1
   3   0   3    1.82    0.24   1
   3   0   3    1.76    0.21   1
   3   0   3    1.86    0.24   1
   3   0   3    1.94    0.26   1
   4   0  -2    2.27    0.30  -2
  -4   0  -3    2.27    0.30   1
   4   0  -2    1.81    0.25  -2
  -4   0  -3    1.81    0.25   1
   4   0  -2    2.01    0.27  -2
  -4   0  -3    2.01    0.27   1
   4   0  -2    2.47    0.25  -2
  -4   0  -3    2.47    0.25   1
  -4   0   2    2.44    0.27  -2
   4   0   3    2.44    0.27   1
  -4   0   2    2.16    0.27  -2
   4   0   3    2.16    0.27   1
  -4   0   2    2.16    0.23  -2
   4   0   3    2.16    0.23   1
  -4   0   2    2.33    0.26  -2
   4   0   3    2.33    0.26   1
  -4   0   2    2.23    0.25  -2
   4   0   3    2.23    0.25   1
  -5   0  -3    0.08    0.20   1
  -5   0  -3    0.12    0.19   1
  -5   0  -3   -0.18    0.23   1
   5   0   3    0.14    0.14   1
   5   0   3    0.03    0.16   1
   5   0   3   -0.08    0.16   1
   5   0   3    0.10    0.17   1
  -6   0  -3    1.14    0.28   1
  -6   0  -3    0.62    0.25   1
  -6   0  -3    0.64    0.23   1
   6   0   3    0.49    0.21   1
   6   0   3    0.49    0.19   1
   7   0  -1    4.45    0.48  -2
  -7   0  -3    4.45    0.48   1
   7   0  -1    3.59    0.41  -2
  -7   0  -3    3.59    0.41   1
  -7   0   1    2.51    0.36  -2
   7   0   3    2.51    0.36   1
  -7   0   1    3.19    0.40  -2
   7   0   3    3.19    0.40   1
  -7   1  -5    0.35    0.18  -2
   7  -1  -3    0.35    0.18   1
  -7   1  -5   -0.10    0.09  -2
   7  -1  -3   -0.10    0.09   1
   7  -1   5    0.12    0.31  -2
  -7   1   3    0.12    0.31   1
   7  -1   5    0.27    0.28  -2
  -7   1   3    0.27    0.28   1
   6  -1  -3    1.01    0.21   1
   6  -1  -3    0.97    0.18   1
  -6   1   3    1.36    0.32   1
  -6   1   3    0.77    0.29   1
   5  -1  -3    3.22    0.35   1
   5  -1  -3    3.07    0.33   1
  -5   1   3    3.79    0.42   1
  -5   1   3    2.42    0.38   1
  -4   1  -4    3.45    0.35  -2
   4  -1  -3    3.45    0.35   1
  -4   1  -4    3.16    0.35  -2
   4  -1  -3    3.16    0.35   1
  -4   1  -4    2.46    0.32  -2
   4  -1  -3    2.46    0.32   1
  -4   1  -4    3.33    0.35  -2
   4  -1  -3    3.33    0.35   1
   4  -1   4    3.10    0.35  -2
  -4   1   3    3.10    0.35   1
   4  -1   4    3.75    0.38  -2
  -4   1   3    3.75    0.38   1
   4  -1   4    3.05    0.35  -2
  -4   1   3    3.05    0.35   1
   3  -1  -3    0.20    0.17   1
   3  -1  -3    0.08    0.14   1
   3  -1  -3    0.21    0.15   1
   3  -1  -3    0.67    0.18   1
   3  -1  -3    0.18    0.16   1
  -3   1   3    0.32    0.19   1
  -3   1   3    0.31    0.16   1
  -3   1   3    0.08    0.21   1
   2  -1  -3    0.38    0.14   1
   2  -1  -3    0.27    0.13   1
   2  -1  -3    0.31    0.10   1
   2  -1  -3    0.19    0.11   1
   2  -1  -3    0.15    0.12   1
  -2   1   3    0.26    0.14   1
  -2   1   3    0.23    0.18   1
  -2   1   3    0.06    0.15   1
  -2   1   3    0.08    0.14   1
   1  -1  -3  141.49   10.15   1
   1  -1  -3  137.23   10.15   1
   1  -1  -3  128.13   10.15   1
  -1   1   3  133.24   10.15   1
  -1   1   3  133.62   10.15   1
  -1   1   3  127.71   10.15   1
  -1   1   3  132.43   10.15   1
   0   1  -3   90.87    6.32  -2
   0  -1  -3   90.87    6.32   1
   0   1  -3   84.99    6.32  -2
   0  -1  -3   84.99    6.32   1
   0   1  -3   89.94    6.32  -2
   0  -1  -3   89.94    6.32   1
   0   1  -3   81.07    6.32  -2
   0  -1  -3   81.07    6.32   1
   0   1  -3   83.63    6.32  -2
   0  -1  -3   83.63    6.32   1
   0  -1   3   80.79    6.32  -2
   0   1   3   80.79    6.32   1
   0  -1   3   81.72    6.32  -2
   0   1   3   81.72    6.32   1
   0  -1   3   73.96    6.32  -2
   0   1   3   73.96    6.32   1
   0  -1   3   79.87    6.32  -2
   0   1   3   79.87    6.32   1
  -1  -1  -3    4.91    0.41   1
  -1  -1  -3    4.72    0.41   1
  -1  -1  -3    4.48    0.40   1
  -1  -1  -3    5.10    0.41   1
  -1  -1  -3    5.46    0.43   1
  -1  -1  -3    5.23    0.42   1
  -1  -1  -3    4.92    0.42   1
   1   1   3    4.57    0.41   1
   1   1   3    5.33    0.43   1
   1   1   3    5.26    0.42   1
   1   1   3    5.24    0.44   1
   1   1   3    4.90    0.43   1
   1   1   3    4.79    0.42   1
  -2  -1  -3    0.19    0.09   1
  -2  -1  -3    0.06    0.11   1
  -2  -1  -3    0.17    0.10   1
   2   1   3    0.19    0.10   1
   2   1   3   -0.17    0.11   1
   2   1   3   -0.11    0.12   1
   2   1   3   -0.15    0.12   1
   2   1   3    0.14    0.12   1
   2   1   3    0.04    0.13   1
   2   1   3   -0.12    0.13   1
   3   1  -2   37.51    2.83  -2
  -3  -1  -3   37.51    2.83   1
   3   1  -2   36.47    2.83  -2
  -3  -1  -3   36.47    2.83   1
  -3  -1   2   35.36    2.85  -2
   3   1   3   35.36    2.85   1
  -3  -1   2   37.53    2.83  -2
   3   1   3   37.53    2.83   1
  -3  -1   2   36.50    2.83  -2
   3   1   3   36.50    2.83   1
  -3  -1   2   36.72    2.83  -2
   3   1   3   36.72    2.83   1
  -3  -1   2   36.40    2.84  -2
   3   1   3   36.40    2.84   1
  -3  -1   2   37.83    2.83  -2
   3   1   3   37.83    2.83   1
  -3  -1   2   37.34    2.85  -2
   3   1   3   37.34    2.85   1
  -4  -1  -3    3.96    0.40   1
  -4  -1  -3    3.56    0.40   1
  -4  -1  -3    3.68    0.35   1
   4   1   3    3.80    0.39   1
   4   1   3    4.34    0.39   1
   4   1   3    3.61    0.37   1
   4   1   3    4.08    0.37   1
  -5  -1  -3    3.83    0.45   1
  -5  -1  -3    4.62    0.44   1
  -5  -1  -3    3.95    0.42   1
   5   1   3    4.15    0.40   1
   5   1   3    3.77    0.41   1
   5   1   3    4.18    0.43   1
  -6  -1  -3    3.71    0.43   1
  -6  -1  -3    3.86    0.44   1
  -6  -1  -3    3.72    0.42   1
   6   1   3    3.71    0.41   1
   6   1   3    3.48    0.42   1
   6   1   3    4.63    0.43   1
   7   1  -1    0.39    0.29  -2
  -7  -1  -3    0.39    0.29   1
   7   1  -1    0.55    0.24  -2
  -7  -1  -3    0.55    0.24   1
  -7  -1   1    0.69    0.21  -2
   7   1   3    0.69    0.21   1
  -7  -1   1    0.55    0.23  -2
   7   1   3    0.55    0.23   1
   8   1   3    0.38    0.24   1
   7  -2  -3    0.13    0.20   1
   7  -2  -3   -0.05    0.24   1
  -7   2   3    0.08    0.37   1
  -7   2   3   -0.09    0.32   1
   6  -2  -3    0.70    0.23   1
  -6   2   3    1.24    0.36   1
  -6   2   3    0.68    0.30   1
   5  -2  -3    0.24    0.17   1
  -5   2   3    0.39    0.25   1
  -5   2   3    0.27    0.29   1
  -4   2  -4    3.08    0.33  -2
   4  -2  -3    3.08    0.33   1
  -4   2  -4    3.14    0.33  -2
   4  -2  -3    3.14    0.33   1
   4  -2   4    3.47    0.39  -2
  -4   2   3    3.47    0.39   1
   4  -2   4    3.11    0.37  -2
  -4   2   3    3.11    0.37   1
   3  -2  -3   -0.05    0.16   1
   3  -2  -3    0.14    0.13   1
   3  -2  -3    0.16    0.15   1
   3  -2  -3    0.38    0.15   1
  -3   2   3    0.14    0.16   1
  -3   2   3   -0.02    0.19   1
  -3   2   3    0.00    0.20   1
  -3   2   3    0.36    0.16   1
   2  -2  -3   23.16    1.68   1
   2  -2  -3   20.89    1.68   1
   2  -2  -3   20.32    1.67   1
   2  -2  -3   21.58    1.67   1
  -2   2   3   21.21    1.69   1
  -2   2   3   21.51    1.68   1
  -2   2   3   21.96    1.68   1
  -1   2  -3   26.83    2.12  -2
   1  -2  -3   26.83    2.12   1
  -1   2  -3   29.63    2.12  -2
   1  -2  -3   29.63    2.12   1
  -1   2  -3   27.65    2.12  -2
   1  -2  -3   27.65    2.12   1
   1  -2   3   26.97    2.12  -2
  -1   2   3   26.97    2.12   1
   1  -2   3   27.61    2.13  -2
  -1   2   3   27.61    2.13   1
   1  -2   3   27.18    2.12  -2
  -1   2   3   27.18    2.12   1
   1  -2   3   26.59    2.12  -2
  -1   2   3   26.59    2.12   1
   0  -2  -3    3.23    0.33   1
   0  -2  -3    3.89    0.32   1
   0  -2  -3    4.01    0.32   1
   0   2   3    2.89    0.33   1
   0   2   3    3.32    0.33   1
   0   2   3    3.17    0.34   1
  -1  -2  -3   15.06    1.23   1
  -1  -2  -3   16.04    1.22   1
  -1  -2  -3   15.34    1.22   1
  -1  -2  -3   15.95    1.23   1
  -1  -2  -3   16.02    1.23   1
   1   2   3   16.59    1.24   1
   1   2   3   16.23    1.24   1
   1   2   3   15.60    1.23   1
   1   2   3   15.24    1.24   1
   1   2   3   16.19    1.23   1
  -2  -2  -3   -0.18    0.10   1
  -2  -2  -3    0.00    0.11   1
  -2  -2  -3   -0.06    0.12   1
  -2  -2  -3    0.01    0.12   1
  -2  -2  -3    0.11    0.11   1
   2   2   3    0.10    0.13   1
   2   2   3   -0.17    0.12   1
   2   2   3   -0.07    0.14   1
   2   2   3   -0.10    0.13   1
   2   2   3   -0.09    0.12   1
   3   2  -2    6.35    0.52  -2
  -3  -2  -3    6.35    0.52   1
   3   2  -2    6.02    0.55  -2
  -3  -2  -3    6.02    0.55   1
   3   2  -2    6.20    0.52  -2
  -3  -2  -3    6.20    0.52   1
   3   2  -2    6.71    0.55  -2
  -3  -2  -3    6.71    0.55   1
  -3  -2   2    6.61    0.52  -2
   3   2   3    6.61    0.52   1
  -3  -2   2    6.07    0.55  -2
   3   2   3    6.07    0.55   1
  -3  -2   2    5.53    0.55  -2
   3   2   3    5.53    0.55   1
  -3  -2   2    6.14    0.53  -2
   3   2   3    6.14    0.53   1
  -3  -2   2    5.94    0.53  -2
   3   2   3    5.94    0.53   1
  -3  -2   2    5.82    0.54  -2
   3   2   3    5.82    0.54   1
  -3  -2   2    6.40    0.53  -2
   3   2   3    6.40    0.53   1
  -4  -2  -3   -0.19    0.16   1
  -4  -2  -3    0.12    0.12   1
   4   2   3    0.05    0.13   1
   4   2   3    0.07    0.14   1
  -5  -2  -3    0.13    0.20   1
   5   2   3    0.20    0.13   1
   5   2   3    0.23    0.19   1
   5   2   3   -0.01    0.16   1
   6   2  -1    4.58    0.50  -2
  -6  -2  -3    4.58    0.50   1
  -6  -2   1    4.79    0.46  -2
   6   2   3    4.79    0.46   1
  -6  -2   1    4.64    0.49  -2
   6   2   3    4.64    0.49   1
  -6  -2   1    4.28    0.47  -2
   6   2   3    4.28    0.47   1
  -7  -2  -3    0.22    0.27   1
   7   2   3    0.12    0.22   1
   7   2   3    0.20    0.22   1
   7  -3  -3    0.17    0.30   1
  -7   3   3    0.20    0.40   1
  -7   3   3    0.78    0.36   1
   6  -3  -3    2.33    0.34   1
  -6   3   3    2.34    0.45   1
  -6   3   3    2.16    0.40   1
  -5   3  -4    1.93    0.28  -2
   5  -3  -3    1.93    0.28   1
   5  -3   4    2.05    0.34  -2
  -5   3   3    2.05    0.34   1
   5  -3   4    1.64    0.37  -2
  -5   3   3    1.64    0.37   1
   4  -3  -3   -0.01    0.16   1
   4  -3  -3    0.34    0.19   1
   4  -3  -3    0.28    0.18   1
  -4   3   3    0.15    0.21   1
  -4   3   3    0.29    0.24   1
  -4   3   3    0.04    0.25   1
   3  -3  -3    1.04    0.20   1
   3  -3  -3    0.92    0.19   1
   3  -3  -3    1.13    0.19   1
  -3   3   3    0.94    0.22   1
  -3   3   3    1.24    0.22   1
  -3   3   3    0.47    0.21   1
  -3   3   3    1.29    0.25   1
   2  -3  -3   61.53    4.36   1
   2  -3  -3   56.93    4.35   1
   2  -3  -3   54.40    4.34   1
  -2   3   3   57.42    4.36   1
  -2   3   3   54.93    4.35   1
  -2   3   3   55.94    4.36   1
  -1   3  -3   13.12    1.03  -2
   1  -3  -3   13.12    1.03   1
  -1   3  -3   12.47    1.03  -2
   1  -3  -3   12.47    1.03   1
  -1   3  -3   13.93    1.02  -2
   1  -3  -3   13.93    1.02   1
   1  -3   3   12.70    1.04  -2
  -1   3   3   12.70    1.04   1
   1  -3   3   11.20    1.03  -2
  -1   3   3   11.20    1.03   1
   1  -3   3   12.55    1.04  -2
  -1   3   3   12.55    1.04   1
   1  -3   3   13.73    1.05  -2
  -1   3   3   13.73    1.05   1
   0  -3  -3    1.86    0.25   1
   0  -3  -3    2.79    0.25   1
   0  -3  -3    2.04    0.23   1
   0   3   3    2.05    0.25   1
   0   3   3    1.69    0.25   1
   0   3   3    1.75    0.24   1
  -1  -3  -3    3.14    0.27   1
  -1  -3  -3    2.51    0.25   1
  -1  -3  -3    2.27    0.25   1
  -1  -3  -3    3.04    0.29   1
   1   3   3    1.59    0.25   1
   1   3   3    1.58    0.26   1
   1   3   3    1.70    0.25   1
   1   3   3    2.59    0.26   1
   2   3  -2   39.24    2.82  -2
  -2  -3  -3   39.24    2.82   1
   2   3  -2   38.20    2.82  -2
  -2  -3  -3   38.20    2.82   1
   2   3  -2   38.79    2.83  -2
  -2  -3  -3   38.79    2.83   1
   2   3  -2   36.24    2.81  -2
  -2  -3  -3   36.24    2.81   1
   2   3  -2   35.19    2.82  -2
  -2  -3  -3   35.19    2.82   1
  -2  -3   2   30.44    2.83  -2
   2   3   3   30.44    2.83   1
  -2  -3   2   37.05    2.83  -2
   2   3   3   37.05    2.83   1
  -2  -3   2   37.49    2.83  -2
   2   3   3   37.49    2.83   1
  -2  -3   2   37.83    2.82  -2
   2   3   3   37.83    2.82   1
  -3  -3  -3    5.13    0.45   1
  -3  -3  -3    4.61    0.41   1
  -3  -3  -3    4.61    0.45   1
   3   3   3    4.50    0.44   1
   3   3   3    4.78    0.43   1
   3   3   3    4.42    0.47   1
  -4  -3  -3    3.16    0.34   1
  -4  -3  -3    3.03    0.34   1
  -4  -3  -3    2.51    0.27   1
   4   3   3    3.00    0.29   1
   4   3   3    2.91    0.31   1
  -5  -3  -3    5.11    0.54   1
   5   3   3    5.73    0.57   1
   5   3   3    5.34    0.52   1
   6   3  -1    0.15    0.24  -2
  -6  -3  -3    0.15    0.24   1
  -6  -3   1    0.20    0.19  -2
   6   3   3    0.20    0.19   1
  -6  -3   1    0.48    0.26  -2
   6   3   3    0.48    0.26   1
  -7  -3  -3    0.20    0.28   1
   7   3   3   -0.13    0.21   1
   7   3   3    0.05    0.28   1
   6  -4  -3    0.09    0.25   1
  -6   4   3    0.37    0.34   1
  -6   4   3    0.60    0.33   1
  -5   4  -4    1.25    0.29  -2
   5  -4  -3    1.25    0.29   1
   5  -4   4    2.11    0.39  -2
  -5   4   3    2.11    0.39   1
   5  -4   4    1.62    0.33  -2
  -5   4   3    1.62    0.33   1
   4  -4  -3    0.49    0.21   1
  -4   4   3    0.47    0.24   1
  -4   4   3    0.37    0.26   1
  -4   4   3    0.76    0.31   1
  -3   4   3    5.21    0.55   1
  -3   4   3    5.60    0.57   1
  -3   4   3    5.55    0.53   1
  -2   4  -3   17.71    1.37  -2
   2  -4  -3   17.71    1.37   1
   2  -4   3   18.04    1.40  -2
  -2   4   3   18.04    1.40   1
   2  -4   3   16.07    1.38  -2
  -2   4   3   16.07    1.38   1
   2  -4   3   17.97    1.40  -2
  -2   4   3   17.97    1.40   1
   1  -4  -3    0.07    0.15   1
  -1   4   3    0.02    0.19   1
  -1   4   3    0.22    0.20   1
  -1   4   3    0.06    0.19   1
   0  -4  -3    6.74    0.59   1
   0  -4  -3    7.58    0.57   1
   0  -4  -3    7.00    0.57   1
   0   4   3    5.51    0.59   1
   0   4   3    7.06    0.59   1
   0   4   3    5.16    0.58   1
  -1  -4  -3    0.91    0.18   1
  -1  -4  -3    1.03    0.18   1
  -1  -4  -3    0.83    0.19   1
  -1  -4  -3    0.96    0.18   1
   1   4   3    0.52    0.19   1
   1   4   3    0.55    0.20   1
   1   4   3    1.02    0.22   1
   2   4  -2    2.00    0.25  -2
  -2  -4  -3    2.00    0.25   1
   2   4  -2    2.69    0.29  -2
  -2  -4  -3    2.69    0.29   1
   2   4  -2    2.46    0.27  -2
  -2  -4  -3    2.46    0.27   1
   2   4  -2    2.49    0.28  -2
  -2  -4  -3    2.49    0.28   1
  -2  -4   2    2.46    0.30  -2
   2   4   3    2.46    0.30   1
  -2  -4   2    2.43    0.27  -2
   2   4   3    2.43    0.27   1
  -2  -4   2    2.00    0.27  -2
   2   4   3    2.00    0.27   1
  -3  -4  -3   -0.05    0.12   1
  -3  -4  -3   -0.10    0.15   1
  -3  -4  -3   -0.24    0.18   1
  -3  -4  -3    0.13    0.15   1
   3   4   3    0.41    0.16   1
   3   4   3    0.08    0.17   1
  -4  -4  -3    0.67    0.22   1
  -4  -4  -3    0.87    0.16   1
  -4  -4  -3    0.92    0.22   1
   4   4   3    0.92    0.19   1
   5   4  -1    4.30    0.49  -2
  -5  -4  -3    4.30    0.49   1
   5   4  -1    4.43    0.49  -2
  -5  -4  -3    4.43    0.49   1
  -6  -4  -3    0.33    0.26   1
   6   4   3    0.23    0.30   1
   6   4   3    0.28    0.20   1
  -7  -4  -3   -0.02    0.26   1
   7   4   3   -0.42    0.26   1
   7   4   3   -0.05    0.21   1
  -6   5  -4    0.44    0.31  -2
   6  -5  -3    0.44    0.31   1
   6  -5   4    1.18    0.39  -2
  -6   5   3    1.18    0.39   1
   6  -5   4    0.56    0.35  -2
  -6   5   3    0.56    0.35   1
   5  -5  -3    0.08    0.25   1
   5  -5  -3    0.30    0.23   1
  -5   5   3    0.27    0.31   1
  -5   5   3    0.17    0.39   1
   4  -5  -3    1.10    0.26   1
  -4   5   3    0.97    0.31   1
  -4   5   3    1.25    0.34   1
  -4   5   3    0.63    0.27   1
   3  -5  -3   15.49    1.35   1
  -3   5   3   18.51    1.39   1
  -3   5   3   16.62    1.38   1
  -3   5   3   16.40    1.34   1
   2  -5   3    1.73    0.30  -2
  -2   5   3    1.73    0.30   1
   2  -5   3    1.57    0.30  -2
  -2   5   3    1.57    0.30   1
   2  -5   3    2.04    0.31  -2
  -2   5   3    2.04    0.31   1
   1  -5  -3    0.89    0.16   1
  -1   5   3    0.28    0.22   1
  -1   5   3   -0.31    0.20   1
  -1   5   3    0.08    0.18   1
   0  -5  -3    3.15    0.31   1
   0   5   3    1.86    0.32   1
   0   5   3    2.60    0.33   1
   1   5  -2   13.16    1.02  -2
  -1  -5  -3   13.16    1.02   1
   1   5  -2   12.39    1.03  -2
  -1  -5  -3   12.39    1.03   1
  -2  -5  -3    3.44    0.36   1
  -2  -5  -3    3.41    0.34   1
  -2  -5  -3    2.67    0.32   1
   2   5   3    3.55    0.38   1
   2   5   3    3.45    0.35   1
  -3  -5  -3    0.21    0.20   1
  -3  -5  -3    0.04    0.18   1
  -3  -5  -3   -0.04    0.13   1
   3   5   3    0.32    0.18   1
   3   5   3    0.11    0.22   1
  -4  -5  -3    2.83    0.31   1
  -4  -5  -3    1.34    0.22   1
  -4  -5  -3    2.48    0.31   1
   4   5   3    1.59    0.24   1
   5   5  -1   -0.08    0.21  -2
  -5  -5  -3   -0.08    0.21   1
   5   5  -1   -0.03    0.23  -2
  -5  -5  -3   -0.03    0.23   1
  -6  -5  -3    0.25    0.25   1
  -6  -5  -3   -0.39    0.25   1
   6   5   3    0.06    0.32   1
  -7  -5  -3   -0.02    0.32   1
   7   5   3    0.23    0.33   1
   5  -6  -3    0.03    0.32   1
   5  -6  -3    0.38    0.26   1
  -5   6   3    0.61    0.34   1
  -5   6   3    0.20    0.35   1
   4  -6  -3    0.49    0.27   1
   4  -6  -3    0.63    0.25   1
  -4   6   3    0.95    0.31   1
  -4   6   3    1.09    0.29   1
  -3   6  -3    5.07    0.53  -2
   3  -6  -3    5.07    0.53   1
   3  -6   3    5.01    0.56  -2
  -3   6   3    5.01    0.56   1
   3  -6   3    4.90    0.53  -2
  -3   6   3    4.90    0.53   1
   3  -6   3    4.96    0.57  -2
  -3   6   3    4.96    0.57   1
   2  -6  -3    0.52    0.24   1
   2  -6  -3    0.18    0.17   1
  -2   6   3    0.86    0.28   1
  -2   6   3    0.48    0.29   1
   1  -6  -3    1.74    0.24   1
  -1   6   3    1.43    0.31   1
  -1   6   3    1.40    0.28   1
   0  -6  -3    0.70    0.19   1
   0   6   3    0.26    0.25   1
   0   6   3    0.69    0.23   1
   1   6  -2    0.24    0.19  -2
  -1  -6  -3    0.24    0.19   1
  -1  -6   2    0.10    0.22  -2
   1   6   3    0.10    0.22   1
  -1  -6   2   -0.04    0.21  -2
   1   6   3   -0.04    0.21   1
  -2  -6  -3    0.25    0.20   1
  -2  -6  -3    0.21    0.20   1
  -2  -6  -3   -0.11    0.14   1
   2   6   3   -0.16    0.18   1
   2   6   3    0.14    0.25   1
  -3  -6  -3    4.09    0.40   1
  -3  -6  -3    3.59    0.42   1
   3   6   3    3.04    0.36   1
   3   6   3    3.06    0.44   1
   4   6  -1    3.21    0.41  -2
  -4  -6  -3    3.21    0.41   1
   4   6  -1    3.37    0.39  -2
  -4  -6  -3    3.37    0.39   1
   4   6  -1    3.59    0.43  -2
  -4  -6  -3    3.59    0.43   1
  -5  -6  -3    1.35    0.30   1
  -5  -6  -3    1.23    0.30   1
  -6  -6  -3    0.11    0.24   1
  -6  -6  -3   -0.20    0.26   1
   6   6   3    0.12    0.37   1
   4  -7  -3    3.62    0.46   1
   4  -7  -3    3.47    0.48   1
  -4   7   3    4.06    0.47   1
  -4   7   3    4.05    0.55   1
  -3   7  -3    0.60    0.27  -2
   3  -7  -3    0.60    0.27   1
  -3   7  -3    0.50    0.25  -2
   3  -7  -3    0.50    0.25   1
   3  -7   3    0.31    0.28  -2
  -3   7   3    0.31    0.28   1
   3  -7   3    0.37    0.28  -2
  -3   7   3    0.37    0.28   1
   2  -7  -3    0.23    0.26   1
  -2   7   3    0.03    0.26   1
  -2   7   3    0.45    0.30   1
   1  -7  -3    1.91    0.26   1
   1  -7  -3    1.74    0.31   1
  -1   7   3    1.39    0.30   1
  -1   7   3    1.45    0.33   1
   0   7  -2    1.56    0.27  -2
   0  -7  -3    1.56    0.27   1
   0   7  -2    2.53    0.31  -2
   0  -7  -3    2.53    0.31   1
   0  -7   2    1.67    0.31  -2
   0   7   3    1.67    0.31   1
   0  -7   2    1.38    0.30  -2
   0   7   3    1.38    0.30   1
  -1  -7  -3    0.97    0.24   1
  -1  -7  -3    0.89    0.24   1
   1   7   3    1.09    0.31   1
  -2  -7  -3    1.21    0.23   1
  -2  -7  -3    1.18    0.27   1
  -2  -7  -3    1.10    0.26   1
   2   7   3    0.63    0.26   1
   2   7   3    1.15    0.33   1
  -3  -7  -3    1.27    0.25   1
  -3  -7  -3    0.42    0.24   1
  -3  -7  -3    0.62    0.22   1
   3   7   3    0.31    0.21   1
   4   7  -1    0.08    0.21  -2
  -4  -7  -3    0.08    0.21   1
   4   7  -1   -0.03    0.26  -2
  -4  -7  -3   -0.03    0.26   1
   4   7  -1    0.37    0.24  -2
  -4  -7  -3    0.37    0.24   1
  -5  -7  -3    0.70    0.22   1
  -5  -7  -3    0.12    0.24   1
  -5  -7  -3    0.35    0.26   1
  -6  -7  -3   -0.18    0.26   1
  -6  -7  -3    0.28    0.31   1
   6   7   3   -0.34    0.39   1
   3  -8  -3    0.36    0.29   1
   3  -8  -3   -0.07    0.29   1
  -3   8   3    0.32    0.32   1
  -3   8   3   -0.05    0.33   1
   2  -8  -3    0.34    0.28   1
   2  -8  -3   -0.28    0.24   1
  -2   8   3    0.35    0.32   1
   1  -8  -3    0.33    0.21   1
   1  -8  -3    0.15    0.27   1
   1  -8  -3    0.26    0.24   1
  -1   8   3    0.07    0.25   1
   0   8  -2    0.33    0.28  -2
   0  -8  -3    0.33    0.28   1
   0   8  -2    0.26    0.22  -2
   0  -8  -3    0.26    0.22   1
   0   8  -2   -0.20    0.22  -2
   0  -8  -3   -0.20    0.22   1
   0  -8   2   -0.18    0.25  -2
   0   8   3   -0.18    0.25   1
  -1  -8  -3   -0.17    0.24   1
  -1  -8  -3   -0.15    0.20   1
  -1  -8  -3    0.18    0.24   1
   1   8   3    0.09    0.26   1
  -2  -8  -3    4.23    0.49   1
  -2  -8  -3    3.65    0.47   1
  -2  -8  -3    4.06    0.45   1
  -2  -8  -3    5.00    0.51   1
   3   8  -1    1.49    0.31  -2
  -3  -8  -3    1.49    0.31   1
   3   8  -1    1.61    0.31  -2
  -3  -8  -3    1.61    0.31   1
   3   8  -1    1.57    0.31  -2
  -3  -8  -3    1.57    0.31   1
  -3  -8   1    1.01    0.27  -2
   3   8   3    1.01    0.27   1
   4   8  -1    0.22    0.27  -2
  -4  -8  -3    0.22    0.27   1
   4   8  -1    0.98    0.30  -2
  -4  -8  -3    0.98    0.30   1
   4   8  -1    0.36    0.27  -2
  -4  -8  -3    0.36    0.27   1
  -5  -8  -3   -0.10    0.15   1
  -5  -8  -3    0.12    0.26   1
  -5  -8  -3    0.02    0.28   1
  -1   9  -2    0.19    0.34  -2
   1  -9  -3    0.19    0.34   1
  -1   9  -2    0.18    0.30  -2
   1  -9  -3    0.18    0.30   1
   1  -9   2    0.64    0.31  -2
  -1   9   3    0.64    0.31   1
   0   9  -2    0.39    0.30  -2
   0  -9  -3    0.39    0.30   1
   0   9  -2    0.49    0.27  -2
   0  -9  -3    0.49    0.27   1
   0  -9   2   -0.10    0.27  -2
   0   9   3   -0.10    0.27   1
  -1  -9  -3    1.76    0.30   1
  -1  -9  -3    1.86    0.35   1
  -1  -9  -3    1.61    0.33   1
   1   9   3    1.43    0.33   1
  -2  -9  -3    0.44    0.17   1
  -2  -9  -3    0.49    0.26   1
  -2  -9  -3    0.45    0.28   1
  -2  -9  -3   -0.21    0.27   1
   3   9  -1    0.42    0.31  -2
  -3  -9  -3    0.42    0.31   1
   3   9  -1    0.12    0.28  -2
  -3  -9  -3    0.12    0.28   1
   3   9  -1   -0.11    0.28  -2
  -3  -9  -3   -0.11    0.28   1
  -3  -9  -6    0.65    0.38  -2
   3   9  -4    0.65    0.38   1
   3   9   6    0.96    0.36  -2
  -3  -9   4    0.96    0.36   1
   3   9   6    0.87    0.32  -2
  -3  -9   4    0.87    0.32   1
   2   9  -4    1.90    0.38   1
  -2  -9   4    1.63    0.37   1
  -2  -9   4    2.15    0.37   1
  -2  -9   4    1.53    0.37   1
   1   9  -4    0.23    0.30   1
  -1  -9   4    0.00    0.15   1
  -1  -9   4    0.21    0.32   1
  -1  -9   4    0.52    0.29   1
  -1  -9   4    0.06    0.27   1
   0  -9  -5    0.11    0.28  -2
   0   9  -4    0.11    0.28   1
   0   9   5   -0.01    0.29  -2
   0  -9   4   -0.01    0.29   1
   0   9   5    0.05    0.27  -2
   0  -9   4    0.05    0.27   1
  -1   9   5    0.61    0.30  -2
   1  -9   4    0.61    0.30   1
  -1   9   5    0.16    0.32  -2
   1  -9   4    0.16    0.32   1
  -4  -8  -6    0.40    0.36  -2
   4   8  -4    0.40    0.36   1
   4   8   6   -0.01    0.30  -2
  -4  -8   4   -0.01    0.30   1
   4   8   6    0.71    0.32  -2
  -4  -8   4    0.71    0.32   1
   4   8   6    0.35    0.25  -2
  -4  -8   4    0.35    0.25   1
  -3  -8  -6    0.06    0.31  -2
   3   8  -4    0.06    0.31   1
   3   8   6    0.05    0.29  -2
  -3  -8   4    0.05    0.29   1
   3   8   6    0.54    0.27  -2
  -3  -8   4    0.54    0.27   1
   3   8   6    0.47    0.27  -2
  -3  -8   4    0.47    0.27   1
   2   8  -4    0.62    0.31   1
  -2  -8   4    0.51    0.29   1
  -2  -8   4    0.19    0.23   1
  -2  -8   4    0.20    0.26   1
  -2  -8   4    0.40    0.26   1
   1   8  -4    0.86    0.27   1
  -1  -8   4   -0.19    0.28   1
  -1  -8   4    0.45    0.27   1
  -1  -8   4    0.31    0.28   1
  -1  -8   4    0.71    0.24   1
   0  -8  -5    1.68    0.32  -2
   0   8  -4    1.68    0.32   1
   0   8   5    1.52    0.30  -2
   0  -8   4    1.52    0.30   1
   0   8   5    1.94    0.33  -2
   0  -8   4    1.94    0.33   1
  -1   8  -4    0.36    0.26   1
   1  -8   4    0.74    0.30   1
   1  -8   4    0.22    0.23   1
  -2   8  -4    0.24    0.30   1
   2  -8   4   -0.21    0.30   1
   2  -8   4    0.30    0.24   1
  -3   8  -4    0.59    0.41   1
   3  -8   4    0.58    0.32   1
   3  -8   4    0.27    0.37   1
   5   7  -4    1.15    0.38   1
  -5  -7   4    1.36    0.36   1
  -5  -7   4    0.63    0.28   1
  -5  -7   4    0.88    0.25   1
  -4  -7  -6    0.31    0.30  -2
   4   7  -4    0.31    0.30   1
   4   7   6    0.21    0.22  -2
  -4  -7   4    0.21    0.22   1
   4   7   6   -0.02    0.22  -2
  -4  -7   4   -0.02    0.22   1
   4   7   6    0.01    0.26  -2
  -4  -7   4    0.01    0.26   1
   3   7  -4    3.34    0.46   1
  -3  -7   4    2.93    0.41   1
  -3  -7   4    3.63    0.44   1
  -3  -7   4    3.64    0.42   1
   2   7  -4    1.00    0.29   1
  -2  -7   4    0.78    0.26   1
  -2  -7   4    0.81    0.28   1
  -2  -7   4    1.78    0.28   1
   1   7  -4   -0.10    0.24   1
  -1  -7   4    0.38    0.20   1
  -1  -7   4   -0.05    0.23   1
  -1  -7   4    0.38    0.22   1
   0  -7  -5    0.33    0.22  -2
   0   7  -4    0.33    0.22   1
   0   7   5    0.40    0.25  -2
   0  -7   4    0.40    0.25   1
   0   7   5    0.51    0.22  -2
   0  -7   4    0.51    0.22   1
  -1   7  -4    0.04    0.24   1
   1  -7   4    0.15    0.24   1
   1  -7   4   -0.09    0.21   1
  -2   7  -4    0.44    0.27   1
   2  -7   4    0.62    0.26   1
   2  -7   4    0.33    0.26   1
   3  -7  -4   -0.19    0.31  -2
  -3   7  -4   -0.19    0.31   1
  -3   7   4    0.04    0.32  -2
   3  -7   4    0.04    0.32   1
  -3   7   4   -0.06    0.24  -2
   3  -7   4   -0.06    0.24   1
  -4   7  -4    3.49    0.55   1
   4  -7   4    4.65    0.52   1
   4  -7   4    2.40    0.46   1
   6   6  -4   -0.01    0.32   1
  -6  -6   4    0.14    0.24   1
  -6  -6   4   -0.21    0.29   1
   5   6  -4    1.31    0.34   1
  -5  -6   4    1.28    0.27   1
  -5  -6   4    1.14    0.31   1
  -4  -6  -6    1.09    0.33  -2
   4   6  -4    1.09    0.33   1
   4   6   6    0.61    0.22  -2
  -4  -6   4    0.61    0.22   1
   4   6   6    1.01    0.29  -2
  -4  -6   4    1.01    0.29   1
   4   6   6    1.17    0.25  -2
  -4  -6   4    1.17    0.25   1
   3   6  -4    3.33    0.42   1
  -3  -6   4    3.21    0.40   1
  -3  -6   4    2.71    0.36   1
  -3  -6   4    3.13    0.37   1
   2   6  -4    0.42    0.24   1
  -2  -6   4    0.37    0.21   1
  -2  -6   4    0.60    0.23   1
  -2  -6   4    0.45    0.22   1
  -1  -6  -5    5.45    0.53  -2
   1   6  -4    5.45    0.53   1
   1   6   5    5.73    0.52  -2
  -1  -6   4    5.73    0.52   1
   1   6   5    5.62    0.55  -2
  -1  -6   4    5.62    0.55   1
   1   6   5    5.03    0.53  -2
  -1  -6   4    5.03    0.53   1
   0   6  -4    1.51    0.25   1
   0  -6   4    1.39    0.24   1
   0  -6   4    1.20    0.26   1
  -1   6  -4    0.33    0.22   1
   1  -6   4   -0.08    0.21   1
   1  -6   4    0.13    0.20   1
  -2   6  -4    1.92    0.31   1
   2  -6   4    1.58    0.28   1
   2  -6   4    1.62    0.31   1
   3  -6  -4    3.61    0.44  -2
  -3   6  -4    3.61    0.44   1
  -3   6   4    2.45    0.39  -2
   3  -6   4    2.45    0.39   1
  -3   6   4    2.79    0.40  -2
   3  -6   4    2.79    0.40   1
  -4   6  -4    0.88    0.38   1
   4  -6   4    1.26    0.34   1
   4  -6   4    1.15    0.31   1
  -5   6  -4    0.13    0.42   1
  -5   6  -4    0.01    0.19   1
   5  -6   4    0.25    0.35   1
   5  -6   4    0.60    0.34   1
   7   5  -4   -0.36    0.31   1
  -7  -5   4    0.23    0.25   1
   6   5  -4    0.45    0.31   1
  -6  -5   4    0.82    0.34   1
  -6  -5   4    0.27    0.22   1
  -5  -5  -6    0.26    0.26  -2
   5   5  -4    0.26    0.26   1
   5   5   6    0.37    0.22  -2
  -5  -5   4    0.37    0.22   1
   5   5   6    0.43    0.25  -2
  -5  -5   4    0.43    0.25   1
   4   5  -4    3.56    0.44   1
  -4  -5   4    3.46    0.42   1
  -4  -5   4    2.46    0.32   1
  -4  -5   4    3.08    0.39   1
   3   5  -4    3.55    0.38   1
   3   5  -4    4.21    0.46   1
  -3  -5   4    4.20    0.42   1
  -3  -5   4    4.35    0.44   1
  -3  -5   4    4.44    0.47   1
   2   5  -4    0.25    0.20   1
  -2  -5   4    0.22    0.18   1
  -2  -5   4    0.03    0.18   1
  -2  -5   4    0.20    0.20   1
  -1  -5  -5    1.07    0.22  -2
   1   5  -4    1.07    0.22   1
  -1  -5  -5    0.91    0.19  -2
   1   5  -4    0.91    0.19   1
   1   5   5    1.08    0.19  -2
  -1  -5   4    1.08    0.19   1
   1   5   5    1.38    0.23  -2
  -1  -5   4    1.38    0.23   1
   1   5   5    0.78    0.17  -2
  -1  -5   4    0.78    0.17   1
   1   5   5    0.88    0.20  -2
  -1  -5   4    0.88    0.20   1
   0   5  -4    0.15    0.17   1
   0  -5   4   -0.05    0.18   1
   0  -5   4   -0.18    0.17   1
  -1   5  -4    0.11    0.19   1
   1  -5   4    0.18    0.16   1
   1  -5   4    0.29    0.19   1
   1  -5   4    0.33    0.19   1
   2  -5  -4    0.07    0.22  -2
  -2   5  -4    0.07    0.22   1
  -2   5   4    0.00    0.19  -2
   2  -5   4    0.00    0.19   1
  -2   5   4    0.01    0.20  -2
   2  -5   4    0.01    0.20   1
  -3   5  -4   10.08    0.94   1
   3  -5   4   11.64    0.92   1
   3  -5   4   10.00    0.92   1
  -4   5  -4    0.92    0.34   1
  -4   5  -4    1.08    0.27   1
   4  -5   4    1.54    0.29   1
   4  -5   4    0.77    0.26   1
  -5   5  -4    0.56    0.30   1
  -5   5  -4    0.57    0.36   1
   5  -5   4    0.69    0.28   1
   5  -5   4    0.23    0.27   1
   6  -5  -3    0.30    0.37  -2
  -6   5  -4    0.30    0.37   1
   6  -5  -3    0.81    0.35  -2
  -6   5  -4    0.81    0.35   1
  -6   5   3    0.39    0.29  -2
   6  -5   4    0.39    0.29   1
  -6   5   3    0.19    0.32  -2
   6  -5   4    0.19    0.32   1
   7   4  -4    0.31    0.29   1
   7   4  -4    0.16    0.24   1
  -7  -4   4   -0.33    0.22   1
   6   4  -4    1.96    0.31   1
   6   4  -4    2.78    0.40   1
  -6  -4   4    2.08    0.38   1
  -6  -4   4    2.40    0.36   1
  -5  -4  -6    3.50    0.40  -2
   5   4  -4    3.50    0.40   1
   5   4   6    2.50    0.38  -2
  -5  -4   4    2.50    0.38   1
   5   4   6    2.37    0.35  -2
  -5  -4   4    2.37    0.35   1
   4   4  -4    7.36    0.65   1
  -4  -4   4    6.87    0.65   1
  -4  -4   4    6.55    0.65   1
   3   4  -4    0.22    0.12   1
   3   4  -4    0.39    0.20   1
  -3  -4   4    0.43    0.19   1
  -3  -4   4    0.50    0.15   1
  -3  -4   4    0.47    0.21   1
  -3  -4   4    0.64    0.18   1
  -2  -4  -5   10.74    0.89  -2
   2   4  -4   10.74    0.89   1
  -2  -4  -5   11.41    0.92  -2
   2   4  -4   11.41    0.92   1
   2   4   5   10.89    0.91  -2
  -2  -4   4   10.89    0.91   1
   2   4   5   10.95    0.91  -2
  -2  -4   4   10.95    0.91   1
   2   4   5   11.28    0.91  -2
  -2  -4   4   11.28    0.91   1
   1   4  -4    7.27    0.60   1
   1   4  -4    7.15    0.57   1
   1   4  -4    6.87    0.60   1
  -1  -4   4    6.36    0.60   1
  -1  -4   4    7.07    0.58   1
  -1  -4   4    6.93    0.58   1
  -1  -4   4    6.90    0.61   1
   0   4  -4    0.53    0.16   1
   0   4  -4    0.31    0.14   1
   0  -4   4    0.45    0.16   1
   0  -4   4    0.46    0.18   1
  -1   4  -4    4.57    0.48   1
   1  -4   4    5.03    0.46   1
   1  -4   4    5.64    0.48   1
   1  -4   4    5.87    0.50   1
   2  -4  -4   10.54    0.88  -2
  -2   4  -4   10.54    0.88   1
  -2   4   4   10.11    0.86  -2
   2  -4   4   10.11    0.86   1
  -2   4   4   10.55    0.87  -2
   2  -4   4   10.55    0.87   1
  -3   4  -4    1.94    0.33   1
  -3   4  -4    2.05    0.25   1
   3  -4   4    1.83    0.28   1
   3  -4   4    1.91    0.27   1
  -4   4  -4   -0.09    0.22   1
  -4   4  -4    0.09    0.28   1
   4  -4   4    0.08    0.23   1
   4  -4   4    0.04    0.17   1
   5  -4  -3    0.43    0.33  -2
  -5   4  -4    0.43    0.33   1
   5  -4  -3    0.54    0.27  -2
  -5   4  -4    0.54    0.27   1
  -5   4   3    0.85    0.26  -2
   5  -4   4    0.85    0.26   1
  -5   4   3    0.31    0.28  -2
   5  -4   4    0.31    0.28   1
  -6   4  -4    0.05    0.29   1
  -6   4  -4    0.30    0.37   1
   6  -4   4    0.29    0.31   1
   6  -4   4    0.40    0.34   1
   7   3  -4   -0.04    0.24   1
   7   3  -4    0.08    0.28   1
  -7  -3   4   -0.14    0.28   1
  -7  -3   4   -0.06    0.23   1
  -6  -3  -6    0.62    0.23  -2
   6   3  -4    0.62    0.23   1
  -6  -3  -6    1.07    0.29  -2
   6   3  -4    1.07    0.29   1
   6   3   6    0.48    0.24  -2
  -6  -3   4    0.48    0.24   1
   6   3   6    0.72    0.25  -2
  -6  -3   4    0.72    0.25   1
   6   3   6    0.97    0.32  -2
  -6  -3   4    0.97    0.32   1
   5   3  -4    1.17    0.24   1
   5   3  -4    1.38    0.28   1
  -5  -3   4    0.82    0.22   1
  -5  -3   4    1.49    0.28   1
  -5  -3   4    0.93    0.27   1
   4   3  -4    3.64    0.41   1
   4   3  -4    4.30    0.44   1
  -4  -3   4    3.85    0.43   1
  -4  -3   4    3.91    0.41   1
  -4  -3   4    4.44    0.45   1
   3   3  -4    0.24    0.11   1
   3   3  -4    0.29    0.11   1
   3   3  -4    0.34    0.18   1
  -3  -3   4    0.47    0.14   1
  -3  -3   4    0.28    0.18   1
  -3  -3   4    0.25    0.15   1
  -3  -3   4    0.33    0.17   1
  -2  -3  -5    0.70    0.17  -2
   2   3  -4    0.70    0.17   1
  -2  -3  -5    0.70    0.20  -2
   2   3  -4    0.70    0.20   1
  -2  -3  -5    0.71    0.15  -2
   2   3  -4    0.71    0.15   1
   2   3   5    0.43    0.17  -2
  -2  -3   4    0.43    0.17   1
   2   3   5    0.69    0.14  -2
  -2  -3   4    0.69    0.14   1
   2   3   5    0.79    0.21  -2
  -2  -3   4    0.79    0.21   1
   2   3   5    1.02    0.21  -2
  -2  -3   4    1.02    0.21   1
   1   3  -4   -0.12    0.16   1
   1   3  -4    0.09    0.11   1
   1   3  -4    0.04    0.13   1
   1   3  -4    0.13    0.14   1
  -1  -3   4    0.19    0.17   1
  -1  -3   4    0.02    0.16   1
  -1  -3   4   -0.13    0.13   1
   0   3  -4    0.52    0.15   1
   0   3  -4    0.63    0.15   1
   0   3  -4    0.50    0.16   1
   0  -3   4    0.66    0.16   1
   0  -3   4    0.78    0.18   1
   1  -3  -4    0.06    0.14  -2
  -1   3  -4    0.06    0.14   1
   1  -3  -4    0.02    0.16  -2
  -1   3  -4    0.02    0.16   1
   1  -3  -4    0.12    0.13  -2
  -1   3  -4    0.12    0.13   1
  -1   3   4    0.03    0.15  -2
   1  -3   4    0.03    0.15   1
  -1   3   4   -0.07    0.16  -2
   1  -3   4   -0.07    0.16   1
  -1   3   4   -0.02    0.14  -2
   1  -3   4   -0.02    0.14   1
  -2   3  -4   23.85    1.83   1
  -2   3  -4   25.25    1.81   1
  -2   3  -4   21.54    1.80   1
   2  -3   4   23.31    1.82   1
   2  -3   4   23.78    1.82   1
   2  -3   4   22.00    1.81   1
  -3   3  -4    1.23    0.27   1
  -3   3  -4    1.66    0.22   1
   3  -3   4    1.40    0.20   1
   3  -3   4    1.37    0.22   1
   3  -3   4    1.00    0.22   1
   3  -3   4    1.52    0.22   1
  -4   3  -4    0.20    0.20   1
  -4   3  -4    0.30    0.26   1
   4  -3   4    0.43    0.16   1
   4  -3   4   -0.01    0.18   1
   4  -3   4   -0.10    0.18   1
   4  -3   4    0.10    0.21   1
   5  -3  -3    0.89    0.31  -2
  -5   3  -4    0.89    0.31   1
   5  -3  -3    0.93    0.26  -2
  -5   3  -4    0.93    0.26   1
  -5   3   3    1.17    0.26  -2
   5  -3   4    1.17    0.26   1
  -5   3   3    0.68    0.25  -2
   5  -3   4    0.68    0.25   1
  -6   3  -4    1.07    0.30   1
  -6   3  -4    0.73    0.33   1
   6  -3   4    0.95    0.31   1
   6  -3   4    0.45    0.26   1
  -7   3  -4    0.15    0.35   1
  -7   3  -4    0.43    0.36   1
   7  -3   4    0.15    0.32   1
   7  -3   4    0.16    0.31   1
   7   2  -4    1.97    0.35   1
   7   2  -4    2.14    0.36   1
  -7  -2   4    1.58    0.30   1
  -7  -2   4    2.06    0.38   1
  -7  -2   4    1.83    0.32   1
  -6  -2  -6    4.09    0.40  -2
   6   2  -4    4.09    0.40   1
  -6  -2  -6    2.96    0.38  -2
   6   2  -4    2.96    0.38   1
   6   2   6    2.88    0.35  -2
  -6  -2   4    2.88    0.35   1
   6   2   6    2.64    0.37  -2
  -6  -2   4    2.64    0.37   1
   6   2   6    2.58    0.36  -2
  -6  -2   4    2.58    0.36   1
   5   2  -4    6.61    0.61   1
   5   2  -4    5.54    0.59   1
   5   2  -4    6.76    0.59   1
  -5  -2   4    6.56    0.58   1
  -5  -2   4    6.87    0.60   1
  -5  -2   4    6.90    0.63   1
   4   2  -4    1.04    0.22   1
   4   2  -4    0.97    0.19   1
  -4  -2   4    1.08    0.23   1
  -4  -2   4    0.51    0.20   1
  -4  -2   4    1.17    0.21   1
  -3  -2  -5   11.47    0.96  -2
   3   2  -4   11.47    0.96   1
  -3  -2  -5   12.20    0.94  -2
   3   2  -4   12.20    0.94   1
  -3  -2  -5   12.23    0.97  -2
   3   2  -4   12.23    0.97   1
  -3  -2  -5   12.53    0.94  -2
   3   2  -4   12.53    0.94   1
   3   2   5    9.88    0.96  -2
  -3  -2   4    9.88    0.96   1
   3   2   5   12.06    0.95  -2
  -3  -2   4   12.06    0.95   1
   3   2   5   11.59    0.97  -2
  -3  -2   4   11.59    0.97   1
   3   2   5   12.11    0.97  -2
  -3  -2   4   12.11    0.97   1
   3   2   5   12.40    0.94  -2
  -3  -2   4   12.40    0.94   1
   2   2  -4   11.43    0.90   1
   2   2  -4   11.13    0.90   1
   2   2  -4   11.59    0.88   1
   2   2  -4   11.79    0.88   1
   2   2  -4   11.03    0.87   1
  -2  -2   4   10.84    0.88   1
  -2  -2   4   10.03    0.90   1
  -2  -2   4   11.01    0.90   1
  -2  -2   4   11.40    0.88   1
  -2  -2   4   11.40    0.91   1
  -2  -2   4   10.59    0.89   1
   1   2  -4   -0.07    0.13   1
   1   2  -4   -0.05    0.09   1
   1   2  -4    0.09    0.12   1
   1   2  -4   -0.13    0.10   1
  -1  -2   4   -0.06    0.13   1
  -1  -2   4   -0.04    0.11   1
  -1  -2   4    0.10    0.14   1
  -1  -2   4   -0.04    0.13   1
   0   2  -4    7.32    0.62   1
   0   2  -4    7.29    0.60   1
   0   2  -4    7.34    0.61   1
   0   2  -4    7.55    0.61   1
   0  -2   4    7.33    0.62   1
   0  -2   4    7.24    0.62   1
   0  -2   4    8.25    0.61   1
   0  -2   4    7.90    0.61   1
   1  -2  -4   22.69    1.75  -2
  -1   2  -4   22.69    1.75   1
   1  -2  -4   22.27    1.75  -2
  -1   2  -4   22.27    1.75   1
   1  -2  -4   21.14    1.75  -2
  -1   2  -4   21.14    1.75   1
  -1   2   4   22.96    1.75  -2
   1  -2   4   22.96    1.75   1
  -1   2   4   23.63    1.75  -2
   1  -2   4   23.63    1.75   1
  -1   2   4   23.31    1.76  -2
   1  -2   4   23.31    1.76   1
  -2   2  -4    0.86    0.17   1
  -2   2  -4    0.89    0.20   1
  -2   2  -4    0.74    0.16   1
  -2   2  -4    0.63    0.20   1
  -2   2  -4    1.05    0.16   1
   2  -2   4    0.94    0.19   1
   2  -2   4    0.91    0.19   1
   2  -2   4    0.77    0.17   1
   2  -2   4    0.78    0.18   1
   2  -2   4    0.91    0.16   1
  -3   2  -4   -0.02    0.19   1
  -3   2  -4    0.26    0.16   1
  -3   2  -4    0.01    0.12   1
  -3   2  -4   -0.02    0.13   1
  -3   2  -4   -0.13    0.14   1
   3  -2   4    0.02    0.13   1
   3  -2   4    0.12    0.15   1
   3  -2   4   -0.24    0.14   1
   3  -2   4    0.04    0.16   1
   4  -2  -3    1.20    0.23  -2
  -4   2  -4    1.20    0.23   1
   4  -2  -3    1.31    0.27  -2
  -4   2  -4    1.31    0.27   1
  -4   2   3    1.29    0.22  -2
   4  -2   4    1.29    0.22   1
  -4   2   3    1.20    0.24  -2
   4  -2   4    1.20    0.24   1
  -5   2  -4    0.45    0.28   1
  -5   2  -4    0.04    0.22   1
   5  -2   4    0.11    0.17   1
   5  -2   4   -0.18    0.20   1
  -6   2  -4    0.23    0.27   1
  -6   2  -4    0.39    0.34   1
   6  -2   4    0.11    0.21   1
   6  -2   4    0.13    0.25   1
  -7   2  -4    0.83    0.36   1
  -7   2  -4    0.64    0.33   1
   7  -2   4    0.09    0.22   1
   7  -2   4   -0.12    0.28   1
  -7  -1  -6    0.46    0.24  -2
   7   1  -4    0.46    0.24   1
  -7  -1  -6    0.27    0.28  -2
   7   1  -4    0.27    0.28   1
   7   1   6    0.73    0.27  -2
  -7  -1   4    0.73    0.27   1
   7   1   6    0.33    0.27  -2
  -7  -1   4    0.33    0.27   1
   6   1  -4    0.45    0.23   1
   6   1  -4    0.59    0.23   1
  -6  -1   4    0.17    0.23   1
  -6  -1   4    0.39    0.29   1
  -6  -1   4    0.25    0.23   1
   5   1  -4    0.92    0.22   1
   5   1  -4    0.78    0.22   1
  -5  -1   4    0.49    0.24   1
  -5  -1   4    1.15    0.23   1
  -5  -1   4    0.57    0.24   1
   4   1  -4    0.52    0.14   1
   4   1  -4    0.66    0.17   1
   4   1  -4    0.81    0.19   1
  -4  -1   4    0.52    0.19   1
  -4  -1   4    0.11    0.18   1
  -4  -1   4    0.34    0.20   1
  -3  -1  -5    0.39    0.16  -2
   3   1  -4    0.39    0.16   1
  -3  -1  -5    0.63    0.19  -2
   3   1  -4    0.63    0.19   1
  -3  -1  -5    0.59    0.15  -2
   3   1  -4    0.59    0.15   1
  -3  -1  -5    0.61    0.13  -2
   3   1  -4    0.61    0.13   1
  -3  -1  -5    0.31    0.13  -2
   3   1  -4    0.31    0.13   1
  -3  -1  -5    0.93    0.18  -2
   3   1  -4    0.93    0.18   1
   3   1   5    0.43    0.19  -2
  -3  -1   4    0.43    0.19   1
   3   1   5    0.43    0.17  -2
  -3  -1   4    0.43    0.17   1
   3   1   5    0.56    0.17  -2
  -3  -1   4    0.56    0.17   1
   3   1   5    0.09    0.18  -2
  -3  -1   4    0.09    0.18   1
   2   1  -4    0.18    0.10   1
   2   1  -4    0.16    0.14   1
   2   1  -4    0.22    0.10   1
   2   1  -4    0.26    0.11   1
   2   1  -4    0.19    0.13   1
   2   1  -4    0.05    0.13   1
  -2  -1   4    0.07    0.09   1
  -2  -1   4    0.12    0.14   1
  -2  -1   4    0.16    0.12   1
  -2  -1   4    0.28    0.15   1
  -2  -1   4   -0.15    0.14   1
   1   1  -4    2.47    0.26   1
   1   1  -4    2.64    0.26   1
   1   1  -4    2.50    0.23   1
   1   1  -4    2.54    0.23   1
   1   1  -4    2.49    0.26   1
  -1  -1   4    2.29    0.26   1
  -1  -1   4    2.39    0.23   1
  -1  -1   4    2.49    0.24   1
  -1  -1   4    2.24    0.24   1
  -1  -1   4    2.75    0.28   1
   0  -1  -4   10.75    0.78  -2
   0   1  -4   10.75    0.78   1
   0  -1  -4   10.36    0.79  -2
   0   1  -4   10.36    0.79   1
   0  -1  -4    9.78    0.78  -2
   0   1  -4    9.78    0.78   1
   0  -1  -4    9.67    0.78  -2
   0   1  -4    9.67    0.78   1
   0   1   4    9.55    0.78  -2
   0  -1   4    9.55    0.78   1
   0   1   4    9.62    0.79  -2
   0  -1   4    9.62    0.79   1
   0   1   4    9.80    0.79  -2
   0  -1   4    9.80    0.79   1
   0   1   4   10.02    0.78  -2
   0  -1   4   10.02    0.78   1
  -1   1  -4   35.91    2.80   1
  -1   1  -4   37.35    2.80   1
  -1   1  -4   36.69    2.80   1
  -1   1  -4   35.45    2.80   1
   1  -1   4   38.22    2.80   1
   1  -1   4   37.62    2.80   1
   1  -1   4   35.08    2.80   1
   1  -1   4   36.16    2.80   1
  -2   1  -4    1.00    0.17   1
  -2   1  -4    1.42    0.19   1
  -2   1  -4    1.25    0.16   1
  -2   1  -4    1.33    0.16   1
  -2   1  -4    1.71    0.21   1
   2  -1   4    1.59    0.20   1
   2  -1   4    1.06    0.20   1
   2  -1   4    1.35    0.17   1
   2  -1   4    1.50    0.19   1
   2  -1   4    1.11    0.17   1
  -3   1  -4    0.03    0.16   1
  -3   1  -4    0.49    0.13   1
  -3   1  -4    0.33    0.20   1
  -3   1  -4    0.06    0.16   1
   3  -1   4    0.33    0.18   1
   3  -1   4    0.00    0.15   1
   3  -1   4    0.31    0.15   1
   3  -1   4    0.41    0.18   1
   3  -1   4    0.14    0.15   1
   4  -1  -3    2.14    0.24  -2
  -4   1  -4    2.14    0.24   1
   4  -1  -3    2.01    0.27  -2
  -4   1  -4    2.01    0.27   1
   4  -1  -3    2.51    0.32  -2
  -4   1  -4    2.51    0.32   1
  -4   1   3    2.06    0.26  -2
   4  -1   4    2.06    0.26   1
  -4   1   3    1.92    0.26  -2
   4  -1   4    1.92    0.26   1
  -4   1   3    1.81    0.24  -2
   4  -1   4    1.81    0.24   1
  -5   1  -4    0.79    0.23   1
  -5   1  -4    0.42    0.26   1
   5  -1   4    0.77    0.22   1
   5  -1   4    0.60    0.18   1
  -6   1  -4    0.31    0.29   1
  -6   1  -4    0.58    0.27   1
   6  -1   4    0.33    0.19   1
   6  -1   4    0.31    0.23   1
   6  -1   4    0.25    0.19   1
   7  -1  -2    1.14    0.35  -2
  -7   1  -4    1.14    0.35   1
   7  -1  -2    0.51    0.29  -2
  -7   1  -4    0.51    0.29   1
  -7   1   2    0.67    0.22  -2
   7  -1   4    0.67    0.22   1
  -7   1   2    0.31    0.24  -2
   7  -1   4    0.31    0.24   1
  -7   1   2    0.35    0.25  -2
   7  -1   4    0.35    0.25   1
  -7   0  -6    1.88    0.31  -2
   7   0  -4    1.88    0.31   1
  -7   0  -6    1.50    0.32  -2
   7   0  -4    1.50    0.32   1
   7   0   6    1.99    0.36  -2
  -7   0   4    1.99    0.36   1
   7   0   6    2.19    0.36  -2
  -7   0   4    2.19    0.36   1
   6   0  -4    3.06    0.40   1
   6   0  -4    3.57    0.41   1
  -6   0   4    3.26    0.42   1
  -6   0   4    4.05    0.45   1
   5   0  -4    1.32    0.25   1
   5   0  -4    1.41    0.25   1
  -5   0   4    1.12    0.27   1
  -5   0   4    1.30    0.29   1
  -4   0  -5    4.91    0.48  -2
   4   0  -4    4.91    0.48   1
  -4   0  -5    5.32    0.51  -2
   4   0  -4    5.32    0.51   1
  -4   0  -5    5.61    0.50  -2
   4   0  -4    5.61    0.50   1
   4   0   5    5.37    0.53  -2
  -4   0   4    5.37    0.53   1
   4   0   5    5.63    0.51  -2
  -4   0   4    5.63    0.51   1
   4   0   5    6.11    0.53  -2
  -4   0   4    6.11    0.53   1
   3   0  -4    4.70    0.43   1
   3   0  -4    4.40    0.45   1
   3   0  -4    4.88    0.41   1
   3   0  -4    4.69    0.44   1
   3   0  -4    4.59    0.44   1
  -3   0   4    4.22    0.44   1
  -3   0   4    4.88    0.46   1
  -3   0   4    4.83    0.45   1
  -3   0   4    5.16    0.46   1
   2   0  -4    0.03    0.12   1
   2   0  -4   -0.08    0.10   1
   2   0  -4    0.05    0.10   1
   2   0  -4   -0.09    0.10   1
   2   0  -4    0.22    0.14   1
  -2   0   4   -0.04    0.15   1
  -2   0   4   -0.01    0.12   1
  -2   0   4    0.00    0.14   1
  -2   0   4   -0.10    0.12   1
  -2   0   4   -0.14    0.16   1
   1   0  -4    1.99    0.23   1
   1   0  -4    2.83    0.25   1
   1   0  -4    2.85    0.25   1
   1   0  -4    2.20    0.24   1
  -1   0   4    2.66    0.26   1
  -1   0   4    2.06    0.25   1
  -1   0   4    1.95    0.23   1
  -1   0   4    2.24    0.24   1
  -1   0   4    2.47    0.23   1
   0   0  -4   32.02    2.47  -2
   0   0  -4   32.02    2.47   1
   0   0  -4   31.80    2.47  -2
   0   0  -4   31.80    2.47   1
   0   0  -4   33.96    2.47  -2
   0   0  -4   33.96    2.47   1
   0   0  -4   34.86    2.47  -2
   0   0  -4   34.86    2.47   1
   0   0   4   31.83    2.47  -2
   0   0   4   31.83    2.47   1
   0   0   4   30.62    2.47  -2
   0   0   4   30.62    2.47   1
   0   0   4   32.66    2.48  -2
   0   0   4   32.66    2.48   1
   0   0   4   30.65    2.47  -2
   0   0   4   30.65    2.47   1
  -1   0  -4    2.06    0.23   1
  -1   0  -4    2.03    0.22   1
  -1   0  -4    2.62    0.23   1
  -1   0  -4    2.31    0.24   1
  -1   0  -4    2.35    0.23   1
   1   0   4    2.18    0.22   1
   1   0   4    1.92    0.22   1
   1   0   4    2.30    0.24   1
   1   0   4    2.11    0.23   1
  -2   0  -4   -0.06    0.12   1
  -2   0  -4   -0.01    0.09   1
  -2   0  -4   -0.08    0.12   1
  -2   0  -4   -0.03    0.13   1
  -2   0  -4    0.06    0.10   1
   2   0   4    0.00    0.11   1
   2   0   4   -0.10    0.13   1
   2   0   4   -0.10    0.12   1
   2   0   4   -0.31    0.10   1
   2   0   4    0.13    0.12   1
   2   0   4    0.07    0.13   1
  -3   0  -4    3.28    0.32   1
  -3   0  -4    2.69    0.31   1
  -3   0  -4    2.45    0.27   1
  -3   0  -4    2.89    0.31   1
  -3   0  -4    2.79    0.29   1
   3   0   4    3.15    0.32   1
   3   0   4    2.78    0.29   1
   3   0   4    2.82    0.29   1
   3   0   4    2.68    0.27   1
   3   0   4    2.52    0.29   1
   3   0   4    2.71    0.31   1
   4   0  -3    0.33    0.20  -2
  -4   0  -4    0.33    0.20   1
   4   0  -3    0.28    0.18  -2
  -4   0  -4    0.28    0.18   1
   4   0  -3    0.33    0.12  -2
  -4   0  -4    0.33    0.12   1
   4   0  -3    0.29    0.15  -2
  -4   0  -4    0.29    0.15   1
  -4   0   3    0.15    0.17  -2
   4   0   4    0.15    0.17   1
  -4   0   3    0.45    0.14  -2
   4   0   4    0.45    0.14   1
  -4   0   3    0.36    0.13  -2
   4   0   4    0.36    0.13   1
  -4   0   3    0.19    0.16  -2
   4   0   4    0.19    0.16   1
  -5   0  -4    1.19    0.19   1
  -5   0  -4    1.12    0.27   1
  -5   0  -4    1.08    0.24   1
  -5   0  -4    0.86    0.22   1
   5   0   4    0.97    0.18   1
   5   0   4    1.22    0.22   1
   5   0   4    1.31    0.19   1
   5   0   4    1.02    0.23   1
  -6   0  -4    0.51    0.29   1
  -6   0  -4    0.35    0.24   1
  -6   0  -4    0.36    0.24   1
   6   0   4    1.09    0.25   1
   6   0   4    0.69    0.21   1
   7   0  -2    2.63    0.39  -2
  -7   0  -4    2.63    0.39   1
   7   0  -2    2.32    0.36  -2
  -7   0  -4    2.32    0.36   1
  -7   0   2    1.65    0.30  -2
   7   0   4    1.65    0.30   1
  -7   0   2    1.33    0.27  -2
   7   0   4    1.33    0.27   1
  -7   1  -6    0.29    0.20  -2
   7  -1  -4    0.29    0.20   1
   7  -1   6    0.24    0.30  -2
  -7   1   4    0.24    0.30   1
   7  -1   6    1.22    0.36  -2
  -7   1   4    1.22    0.36   1
   6  -1  -4    0.57    0.18   1
   6  -1  -4    0.37    0.29   1
  -6   1   4   -0.02    0.26   1
  -6   1   4    0.17    0.30   1
   5  -1  -4    0.73    0.20   1
   5  -1  -4    0.89    0.24   1
  -5   1   4    0.49    0.28   1
  -5   1   4    0.55    0.26   1
  -4   1  -5    2.39    0.28  -2
   4  -1  -4    2.39    0.28   1
  -4   1  -5    1.82    0.24  -2
   4  -1  -4    1.82    0.24   1
  -4   1  -5    1.72    0.24  -2
   4  -1  -4    1.72    0.24   1
   4  -1   5    2.43    0.31  -2
  -4   1   4    2.43    0.31   1
   4  -1   5    1.96    0.28  -2
  -4   1   4    1.96    0.28   1
   4  -1   5    1.62    0.26  -2
  -4   1   4    1.62    0.26   1
   3  -1  -4    0.33    0.16   1
   3  -1  -4    0.23    0.15   1
   3  -1  -4    0.46    0.16   1
   3  -1  -4    0.67    0.20   1
  -3   1   4    0.20    0.18   1
  -3   1   4    0.06    0.20   1
  -3   1   4    0.11    0.20   1
   2  -1  -4    3.30    0.32   1
   2  -1  -4    2.49    0.29   1
   2  -1  -4    2.78    0.30   1
   2  -1  -4    2.96    0.28   1
  -2   1   4    2.50    0.30   1
  -2   1   4    3.65    0.33   1
  -2   1   4    2.95    0.31   1
  -2   1   4    3.04    0.30   1
   1  -1  -4   34.38    2.91   1
   1  -1  -4   39.79    2.91   1
   1  -1  -4   36.72    2.91   1
   1  -1  -4   42.07    2.92   1
  -1   1   4   38.84    2.92   1
  -1   1   4   37.85    2.91   1
  -1   1   4   36.84    2.91   1
   0   1  -4    9.47    0.72  -2
   0  -1  -4    9.47    0.72   1
   0   1  -4    8.56    0.71  -2
   0  -1  -4    8.56    0.71   1
   0   1  -4    9.47    0.71  -2
   0  -1  -4    9.47    0.71   1
   0   1  -4    8.84    0.71  -2
   0  -1  -4    8.84    0.71   1
   0   1  -4    9.36    0.70  -2
   0  -1  -4    9.36    0.70   1
   0  -1   4    8.46    0.72  -2
   0   1   4    8.46    0.72   1
   0  -1   4    7.92    0.72  -2
   0   1   4    7.92    0.72   1
   0  -1   4    8.78    0.71  -2
   0   1   4    8.78    0.71   1
   0  -1   4    9.19    0.71  -2
   0   1   4    9.19    0.71   1
  -1  -1  -4    0.40    0.09   1
  -1  -1  -4    0.71    0.13   1
  -1  -1  -4    0.72    0.13   1
  -1  -1  -4    0.60    0.13   1
  -1  -1  -4    0.43    0.13   1
  -1  -1  -4    0.51    0.11   1
   1   1   4    0.60    0.12   1
   1   1   4    0.49    0.13   1
   1   1   4    0.64    0.15   1
   1   1   4    0.54    0.14   1
   1   1   4    0.65    0.14   1
  -2  -1  -4    4.68    0.41   1
  -2  -1  -4    4.77    0.41   1
  -2  -1  -4    5.37    0.43   1
  -2  -1  -4    4.69    0.39   1
  -2  -1  -4    4.79    0.40   1
   2   1   4    4.73    0.42   1
   2   1   4    4.75    0.40   1
   2   1   4    4.78    0.43   1
   2   1   4    4.67    0.40   1
   2   1   4    4.11    0.42   1
   2   1   4    4.72    0.42   1
   2   1   4    4.68    0.42   1
   2   1   4    4.71    0.41   1
   3   1  -3    8.02    0.67  -2
  -3  -1  -4    8.02    0.67   1
   3   1  -3    8.44    0.68  -2
  -3  -1  -4    8.44    0.68   1
   3   1  -3    7.48    0.65  -2
  -3  -1  -4    7.48    0.65   1
  -3  -1   3    8.41    0.68  -2
   3   1   4    8.41    0.68   1
  -3  -1   3    8.34    0.68  -2
   3   1   4    8.34    0.68   1
  -3  -1   3    7.90    0.70  -2
   3   1   4    7.90    0.70   1
  -3  -1   3    8.36    0.68  -2
   3   1   4    8.36    0.68   1
  -3  -1   3    8.25    0.69  -2
   3   1   4    8.25    0.69   1
  -3  -1   3    8.59    0.69  -2
   3   1   4    8.59    0.69   1
  -3  -1   3    8.27    0.68  -2
   3   1   4    8.27    0.68   1
  -3  -1   3    8.08    0.66  -2
   3   1   4    8.08    0.66   1
  -4  -1  -4    0.31    0.13   1
  -4  -1  -4    0.22    0.16   1
   4   1   4    0.28    0.15   1
   4   1   4    0.41    0.15   1
   4   1   4    0.01    0.13   1
   5   1   4    1.30    0.21   1
   5   1   4    0.84    0.22   1
   5   1   4    1.18    0.22   1
  -6  -1  -4   -0.09    0.21   1
   6   1   4    0.28    0.18   1
   6   1   4    0.00    0.22   1
   7   1  -2    1.23    0.31  -2
  -7  -1  -4    1.23    0.31   1
  -7  -1   2    1.37    0.29  -2
   7   1   4    1.37    0.29   1
  -7  -1   2    1.29    0.27  -2
   7   1   4    1.29    0.27   1
   7  -2  -4   -0.01    0.15   1
   7  -2  -4    0.23    0.27   1
  -7   2   4   -0.03    0.30   1
  -7   2   4    0.15    0.35   1
   6  -2  -4    0.89    0.25   1
  -6   2   4    1.82    0.34   1
  -6   2   4    1.62    0.38   1
   5  -2  -4    1.27    0.23   1
   5  -2  -4    1.33    0.26   1
  -5   2   4    0.97    0.29   1
  -5   2   4    1.05    0.30   1
  -4   2  -5    1.01    0.19  -2
   4  -2  -4    1.01    0.19   1
  -4   2  -5    1.43    0.23  -2
   4  -2  -4    1.43    0.23   1
   4  -2   5    1.08    0.28  -2
  -4   2   4    1.08    0.28   1
   4  -2   5    1.39    0.28  -2
  -4   2   4    1.39    0.28   1
   4  -2   5    0.66    0.22  -2
  -4   2   4    0.66    0.22   1
   3  -2  -4   -0.08    0.11   1
   3  -2  -4    0.29    0.16   1
   3  -2  -4   -0.16    0.15   1
   3  -2  -4   -0.11    0.13   1
  -3   2   4   -0.32    0.17   1
  -3   2   4    0.11    0.19   1
  -3   2   4    0.11    0.20   1
  -3   2   4   -0.01    0.19   1
   2  -2  -4    0.52    0.18   1
   2  -2  -4    0.21    0.17   1
   2  -2  -4    0.21    0.13   1
  -2   2   4    0.30    0.19   1
  -2   2   4    0.32    0.19   1
  -2   2   4    0.47    0.22   1
  -1   2  -4   23.73    1.73  -2
   1  -2  -4   23.73    1.73   1
  -1   2  -4   21.78    1.73  -2
   1  -2  -4   21.78    1.73   1
  -1   2  -4   24.11    1.73  -2
   1  -2  -4   24.11    1.73   1
   1  -2   4   22.42    1.73  -2
  -1   2   4   22.42    1.73   1
   1  -2   4   23.77    1.74  -2
  -1   2   4   23.77    1.74   1
   1  -2   4   18.62    1.73  -2
  -1   2   4   18.62    1.73   1
   0  -2  -4   11.40    0.82   1
   0  -2  -4   10.15    0.82   1
   0  -2  -4   11.60    0.81   1
   0  -2  -4   10.40    0.82   1
   0  -2  -4   10.67    0.82   1
   0   2   4   10.01    0.82   1
   0   2   4    8.94    0.83   1
   0   2   4    9.89    0.80   1
   0   2   4    8.98    0.83   1
  -1  -2  -4   -0.01    0.11   1
  -1  -2  -4    0.04    0.10   1
  -1  -2  -4    0.03    0.12   1
  -1  -2  -4    0.14    0.11   1
  -1  -2  -4   -0.02    0.11   1
   1   2   4    0.04    0.13   1
   1   2   4    0.04    0.12   1
   1   2   4    0.03    0.13   1
   1   2   4    0.04    0.15   1
   1   2   4    0.01    0.10   1
   1   2   4   -0.07    0.14   1
  -2  -2  -4    6.06    0.51   1
  -2  -2  -4    5.95    0.49   1
  -2  -2  -4    5.94    0.49   1
  -2  -2  -4    5.93    0.50   1
   2   2   4    5.36    0.51   1
   2   2   4    5.30    0.51   1
   2   2   4    5.55    0.51   1
   2   2   4    6.22    0.51   1
   2   2   4    6.00    0.48   1
   2   2   4    5.70    0.50   1
   2   2   4    5.85    0.51   1
   3   2  -3    1.20    0.17  -2
  -3  -2  -4    1.20    0.17   1
   3   2  -3    1.27    0.20  -2
  -3  -2  -4    1.27    0.20   1
   3   2  -3    1.18    0.18  -2
  -3  -2  -4    1.18    0.18   1
  -3  -2   3    1.55    0.23  -2
   3   2   4    1.55    0.23   1
  -3  -2   3    1.34    0.22  -2
   3   2   4    1.34    0.22   1
  -3  -2   3    1.39    0.20  -2
   3   2   4    1.39    0.20   1
  -3  -2   3    1.00    0.19  -2
   3   2   4    1.00    0.19   1
  -3  -2   3    1.28    0.19  -2
   3   2   4    1.28    0.19   1
  -3  -2   3    1.31    0.19  -2
   3   2   4    1.31    0.19   1
  -3  -2   3    1.38    0.21  -2
   3   2   4    1.38    0.21   1
  -4  -2  -4    3.55    0.40   1
  -4  -2  -4    4.25    0.38   1
   4   2   4    4.18    0.40   1
   4   2   4    4.14    0.38   1
   5   2   4    2.79    0.33   1
   5   2   4    3.40    0.36   1
   5   2   4    2.77    0.32   1
   6   2  -2    5.80    0.58  -2
  -6  -2  -4    5.80    0.58   1
  -6  -2   2    6.05    0.57  -2
   6   2   4    6.05    0.57   1
  -6  -2   2    5.46    0.55  -2
   6   2   4    5.46    0.55   1
  -6  -2   2    5.98    0.58  -2
   6   2   4    5.98    0.58   1
  -7  -2  -4   -0.23    0.27   1
   7   2   4   -0.01    0.25   1
   7   2   4   -0.03    0.19   1
   7   2   4    0.13    0.23   1
   7  -3  -4    1.15    0.33   1
  -7   3   4    1.01    0.39   1
  -7   3   4    1.65    0.46   1
   6  -3  -4    0.55    0.25   1
  -6   3   4    1.16    0.38   1
  -6   3   4    0.72    0.30   1
  -5   3  -5    1.72    0.26  -2
   5  -3  -4    1.72    0.26   1
   5  -3   5    1.08    0.32  -2
  -5   3   4    1.08    0.32   1
   5  -3   5    1.18    0.34  -2
  -5   3   4    1.18    0.34   1
   4  -3  -4    0.08    0.17   1
   4  -3  -4    0.17    0.18   1
   4  -3  -4    0.25    0.23   1
  -4   3   4   -0.16    0.20   1
  -4   3   4    0.07    0.25   1
  -4   3   4   -0.28    0.20   1
  -4   3   4    0.20    0.22   1
   3  -3  -4    1.60    0.23   1
   3  -3  -4    1.35    0.22   1
  -3   3   4    1.49    0.27   1
  -3   3   4    1.20    0.23   1
  -3   3   4    1.19    0.23   1
  -3   3   4    0.92    0.25   1
   2  -3  -4   24.89    1.86   1
   2  -3  -4   23.29    1.84   1
   2  -3  -4   24.30    1.86   1
  -2   3   4   21.38    1.86   1
  -2   3   4   24.50    1.86   1
  -2   3   4   24.41    1.86   1
  -1   3  -4    0.36    0.17  -2
   1  -3  -4    0.36    0.17   1
  -1   3  -4    0.20    0.16  -2
   1  -3  -4    0.20    0.16   1
  -1   3  -4    0.16    0.14  -2
   1  -3  -4    0.16    0.14   1
   1  -3   4    0.19    0.19  -2
  -1   3   4    0.19    0.19   1
   1  -3   4   -0.11    0.20  -2
  -1   3   4   -0.11    0.20   1
   1  -3   4    0.42    0.19  -2
  -1   3   4    0.42    0.19   1
   1  -3   4    0.10    0.20  -2
  -1   3   4    0.10    0.20   1
   0  -3  -4    0.27    0.14   1
   0  -3  -4    0.32    0.15   1
   0  -3  -4    0.03    0.14   1
   0   3   4    0.23    0.19   1
   0   3   4   -0.05    0.18   1
   0   3   4   -0.06    0.17   1
  -1  -3  -4    9.00    0.71   1
  -1  -3  -4    9.56    0.73   1
  -1  -3  -4    9.32    0.73   1
  -1  -3  -4    9.26    0.73   1
   1   3   4    8.35    0.75   1
   1   3   4    7.68    0.74   1
   1   3   4    8.30    0.73   1
   1   3   4    8.98    0.73   1
   2   3  -3   13.76    1.05  -2
  -2  -3  -4   13.76    1.05   1
   2   3  -3   13.54    1.06  -2
  -2  -3  -4   13.54    1.06   1
   2   3  -3   13.76    1.07  -2
  -2  -3  -4   13.76    1.07   1
   2   3  -3   14.42    1.08  -2
  -2  -3  -4   14.42    1.08   1
   2   3  -3   13.17    1.06  -2
  -2  -3  -4   13.17    1.06   1
   2   3  -3   14.38    1.07  -2
  -2  -3  -4   14.38    1.07   1
  -2  -3   3   13.26    1.08  -2
   2   3   4   13.26    1.08   1
  -2  -3   3   14.30    1.08  -2
   2   3   4   14.30    1.08   1
  -2  -3   3   13.93    1.08  -2
   2   3   4   13.93    1.08   1
  -2  -3   3   10.92    1.08  -2
   2   3   4   10.92    1.08   1
  -2  -3   3   13.77    1.08  -2
   2   3   4   13.77    1.08   1
  -2  -3   3   12.23    1.08  -2
   2   3   4   12.23    1.08   1
  -3  -3  -4    0.00    0.11   1
  -3  -3  -4    0.22    0.15   1
  -3  -3  -4    0.16    0.16   1
  -3  -3  -4    0.02    0.12   1
  -3  -3  -4    0.21    0.14   1
   3   3   4    0.25    0.14   1
   3   3   4    0.07    0.16   1
   3   3   4    0.13    0.17   1
  -4  -3  -4    2.12    0.28   1
  -4  -3  -4    2.07    0.23   1
   4   3   4    1.99    0.24   1
   4   3   4    1.92    0.26   1
  -5  -3  -4   -0.03    0.20   1
   5   3   4    0.03    0.19   1
   5   3   4   -0.13    0.14   1
   6   3  -2    1.32    0.30  -2
  -6  -3  -4    1.32    0.30   1
  -6  -3   2    1.54    0.30  -2
   6   3   4    1.54    0.30   1
  -6  -3   2    1.05    0.25  -2
   6   3   4    1.05    0.25   1
  -7  -3  -4    0.50    0.30   1
   7   3   4    0.37    0.24   1
   7   3   4    0.57    0.29   1
   6  -4  -4    0.17    0.25   1
  -6   4   4   -0.12    0.37   1
  -6   4   4    0.63    0.32   1
  -5   4  -5    0.20    0.26  -2
   5  -4  -4    0.20    0.26   1
   5  -4   5    0.46    0.29  -2
  -5   4   4    0.46    0.29   1
   5  -4   5    0.52    0.34  -2
  -5   4   4    0.52    0.34   1
   4  -4  -4   -0.09    0.17   1
  -4   4   4   -0.03    0.26   1
  -4   4   4    0.04    0.27   1
  -4   4   4    0.21    0.24   1
   3  -4  -4    1.51    0.25   1
  -3   4   4    1.22    0.33   1
  -3   4   4    1.08    0.27   1
  -3   4   4    1.92    0.28   1
  -3   4   4    1.33    0.30   1
  -2   4  -4    8.84    0.73  -2
   2  -4  -4    8.84    0.73   1
   2  -4   4    7.07    0.74  -2
  -2   4   4    7.07    0.74   1
   2  -4   4    9.94    0.77  -2
  -2   4   4    9.94    0.77   1
   2  -4   4    9.41    0.77  -2
  -2   4   4    9.41    0.77   1
   1  -4  -4    6.91    0.57   1
  -1   4   4    6.17    0.60   1
  -1   4   4    5.53    0.58   1
  -1   4   4    7.02    0.60   1
  -1   4   4    6.77    0.61   1
   0  -4  -4    0.16    0.16   1
   0  -4  -4    0.47    0.15   1
   0   4   4   -0.12    0.18   1
   0   4   4    0.29    0.20   1
   0   4   4    0.49    0.21   1
  -1  -4  -4    3.89    0.37   1
  -1  -4  -4    4.07    0.38   1
  -1  -4  -4    3.53    0.36   1
  -1  -4  -4    3.63    0.38   1
   1   4   4    3.87    0.38   1
   1   4   4    3.20    0.37   1
   1   4   4    4.32    0.41   1
   1   4   4    3.57    0.40   1
   2   4  -3    3.37    0.32  -2
  -2  -4  -4    3.37    0.32   1
   2   4  -3    2.75    0.29  -2
  -2  -4  -4    2.75    0.29   1
   2   4  -3    2.86    0.30  -2
  -2  -4  -4    2.86    0.30   1
   2   4  -3    3.16    0.33  -2
  -2  -4  -4    3.16    0.33   1
   2   4  -3    2.88    0.30  -2
  -2  -4  -4    2.88    0.30   1
  -2  -4   3    2.56    0.32  -2
   2   4   4    2.56    0.32   1
  -2  -4   3    2.79    0.33  -2
   2   4   4    2.79    0.33   1
  -2  -4   3    2.86    0.31  -2
   2   4   4    2.86    0.31   1
  -2  -4   3    3.03    0.31  -2
   2   4   4    3.03    0.31   1
  -3  -4  -4    4.48    0.43   1
  -3  -4  -4    3.89    0.40   1
  -3  -4  -4    4.59    0.43   1
  -3  -4  -4    4.05    0.43   1
   3   4   4    4.96    0.45   1
   3   4   4    4.09    0.42   1
  -4  -4  -4    6.33    0.58   1
  -4  -4  -4    5.65    0.54   1
  -4  -4  -4    6.76    0.58   1
   4   4   4    6.42    0.55   1
   5   4  -2    8.33    0.76  -2
  -5  -4  -4    8.33    0.76   1
   5   4  -2    8.91    0.77  -2
  -5  -4  -4    8.91    0.77   1
  -5  -4   2    8.35    0.73  -2
   5   4   4    8.35    0.73   1
  -6  -4  -4    0.15    0.25   1
   6   4   4   -0.08    0.30   1
  -7  -4  -4    0.16    0.29   1
   7   4   4   -0.20    0.21   1
   7   4   4    0.25    0.29   1
  -6   5  -5    0.18    0.30  -2
   6  -5  -4    0.18    0.30   1
   6  -5   5    1.27    0.37  -2
  -6   5   4    1.27    0.37   1
   6  -5   5    0.94    0.41  -2
  -6   5   4    0.94    0.41   1
   5  -5  -4   -0.13    0.23   1
  -5   5   4    0.11    0.29   1
  -5   5   4    0.15    0.34   1
   4  -5  -4    0.97    0.27   1
  -4   5   4    0.22    0.32   1
  -4   5   4    0.31    0.30   1
  -4   5   4    0.86    0.27   1
   3  -5  -4   10.91    0.94   1
  -3   5   4   11.65    0.99   1
  -3   5   4   11.26    0.95   1
  -3   5   4   11.44    1.00   1
  -2   5  -4    0.29    0.20  -2
   2  -5  -4    0.29    0.20   1
   2  -5   4    0.15    0.23  -2
  -2   5   4    0.15    0.23   1
   2  -5   4    0.36    0.23  -2
  -2   5   4    0.36    0.23   1
  -1   5   4    0.09    0.22   1
  -1   5   4    0.26    0.21   1
   0  -5  -4    4.38    0.42   1
   0   5   4    4.58    0.46   1
   0   5   4    3.96    0.44   1
   1   5  -3    8.08    0.64  -2
  -1  -5  -4    8.08    0.64   1
  -1  -5   3    6.75    0.63  -2
   1   5   4    6.75    0.63   1
  -1  -5   3    6.85    0.67  -2
   1   5   4    6.85    0.67   1
  -1  -5   3    7.79    0.66  -2
   1   5   4    7.79    0.66   1
  -2  -5  -4    0.15    0.12   1
  -2  -5  -4    0.12    0.17   1
  -2  -5  -4    0.35    0.18   1
   2   5   4   -0.09    0.21   1
   2   5   4    0.12    0.19   1
  -3  -5  -4    1.55    0.25   1
  -3  -5  -4    1.42    0.25   1
   3   5   4    0.86    0.22   1
   3   5   4    1.32    0.26   1
  -4  -5  -4    0.22    0.22   1
  -4  -5  -4    0.70    0.22   1
   4   5   4    0.07    0.17   1
   4   5   4    0.27    0.24   1
   5   5  -2    1.14    0.28  -2
  -5  -5  -4    1.14    0.28   1
   5   5  -2    1.47    0.30  -2
  -5  -5  -4    1.47    0.30   1
  -6  -5  -4    0.30    0.27   1
  -7  -5  -4   -0.31    0.27   1
   7   5   4    0.29    0.32   1
   5  -6  -4    0.14    0.27   1
   5  -6  -4    0.57    0.29   1
  -5   6   4    0.08    0.36   1
  -5   6   4    0.61    0.30   1
   4  -6  -4    0.17    0.24   1
  -4   6   4    0.63    0.33   1
  -4   6   4    0.95    0.29   1
  -4   6   4    0.55    0.34   1
  -3   6  -4    2.84    0.36  -2
   3  -6  -4    2.84    0.36   1
   3  -6   4    3.09    0.43  -2
  -3   6   4    3.09    0.43   1
   3  -6   4    2.86    0.42  -2
  -3   6   4    2.86    0.42   1
   3  -6   4    2.22    0.37  -2
  -3   6   4    2.22    0.37   1
  -2   6   4    1.80    0.37   1
  -2   6   4    2.40    0.37   1
   1  -6  -4    0.30    0.17   1
  -1   6   4    0.19    0.27   1
  -1   6   4   -0.30    0.23   1
   0  -6  -4    1.39    0.23   1
   0   6   4    1.07    0.26   1
   0   6   4    1.28    0.29   1
   0   6   4    0.69    0.26   1
   1   6  -3    2.55    0.29  -2
  -1  -6  -4    2.55    0.29   1
  -1  -6   3    2.32    0.34  -2
   1   6   4    2.32    0.34   1
  -1  -6   3    2.32    0.31  -2
   1   6   4    2.32    0.31   1
  -1  -6   3    1.51    0.26  -2
   1   6   4    1.51    0.26   1
  -2  -6  -4    2.71    0.31   1
  -2  -6  -4    2.49    0.32   1
   2   6   4    1.89    0.30   1
   2   6   4    2.40    0.37   1
  -3  -6  -4    9.51    0.84   1
  -3  -6  -4   10.31    0.83   1
   3   6   4    8.80    0.81   1
   3   6   4    9.37    0.88   1
   4   6  -2    7.33    0.66  -2
  -4  -6  -4    7.33    0.66   1
   4   6  -2    7.12    0.66  -2
  -4  -6  -4    7.12    0.66   1
  -4  -6   2    6.32    0.64  -2
   4   6   4    6.32    0.64   1
  -5  -6  -4    0.96    0.29   1
  -5  -6  -4    0.93    0.27   1
  -6  -6  -4    0.23    0.28   1
  -6  -6  -4   -0.09    0.27   1
   6   6   4    0.13    0.36   1
   4  -7  -4    2.90    0.40   1
   4  -7  -4    3.62    0.46   1
  -4   7   4    3.37    0.44   1
  -4   7   4    2.76    0.49   1
  -3   7  -4    0.18    0.27  -2
   3  -7  -4    0.18    0.27   1
   3  -7   4    0.54    0.34  -2
  -3   7   4    0.54    0.34   1
   3  -7   4   -0.33    0.27  -2
  -3   7   4   -0.33    0.27   1
   3  -7   4   -0.07    0.34  -2
  -3   7   4   -0.07    0.34   1
   2  -7  -4    0.66    0.21   1
   2  -7  -4    1.00    0.28   1
  -2   7   4    0.60    0.31   1
  -2   7   4   -0.01    0.27   1
   1  -7  -4    1.03    0.25   1
   1  -7  -4    1.28    0.27   1
  -1   7   4    1.14    0.32   1
  -1   7   4    1.17    0.27   1
   0   7  -3    2.92    0.35  -2
   0  -7  -4    2.92    0.35   1
   0  -7   3    2.88    0.37  -2
   0   7   4    2.88    0.37   1
   0  -7   3    2.80    0.42  -2
   0   7   4    2.80    0.42   1
  -1  -7  -4    0.06    0.20   1
   1   7   4   -0.20    0.25   1
   1   7   4    0.07    0.29   1
  -2  -7  -4    0.30    0.22   1
  -2  -7  -4    0.16    0.21   1
   2   7   4    0.26    0.26   1
   2   7   4   -0.11    0.23   1
  -3  -7  -4    2.37    0.34   1
  -3  -7  -4    2.01    0.32   1
   3   7   4    1.73    0.30   1
   3   7   4    1.50    0.37   1
   4   7  -2    1.44    0.29  -2
  -4  -7  -4    1.44    0.29   1
   4   7  -2    1.39    0.30  -2
  -4  -7  -4    1.39    0.30   1
   4   7  -2    1.67    0.33  -2
  -4  -7  -4    1.67    0.33   1
  -4  -7   2    2.04    0.28  -2
   4   7   4    2.04    0.28   1
  -5  -7  -4    0.11    0.27   1
  -5  -7  -4   -0.12    0.23   1
  -5  -7  -4   -0.30    0.20   1
  -6  -7  -4   -0.42    0.27   1
   6   7   4    0.02    0.37   1
   3  -8  -4    0.13    0.32   1
   3  -8  -4    0.45    0.35   1
  -3   8   4    0.92    0.37   1
  -3   8   4    0.02    0.30   1
   2  -8  -4    0.21    0.31   1
   2  -8  -4    0.24    0.14   1
  -2   8   4    0.25    0.31   1
   1  -8  -4    0.14    0.22   1
   1  -8  -4    0.26    0.24   1
  -1   8   4   -0.10    0.31   1
  -1   8   4    0.16    0.28   1
   0   8  -3    1.33    0.28  -2
   0  -8  -4    1.33    0.28   1
   0   8  -3    1.21    0.29  -2
   0  -8  -4    1.21    0.29   1
   0  -8   3    0.61    0.32  -2
   0   8   4    0.61    0.32   1
   0  -8   3    1.19    0.31  -2
   0   8   4    1.19    0.31   1
  -1  -8  -4    0.70    0.25   1
  -1  -8  -4    0.67    0.24   1
   1   8   4    0.25    0.33   1
   1   8   4    0.34    0.28   1
  -2  -8  -4   10.46    0.83   1
  -2  -8  -4    9.30    0.84   1
  -2  -8  -4   10.65    0.84   1
   2   8   4    7.91    0.85   1
   2   8   4    7.46    0.88   1
   3   8  -2    4.22    0.46  -2
  -3  -8  -4    4.22    0.46   1
   3   8  -2    3.86    0.44  -2
  -3  -8  -4    3.86    0.44   1
   3   8  -2    2.98    0.43  -2
  -3  -8  -4    2.98    0.43   1
  -3  -8   2    2.96    0.41  -2
   3   8   4    2.96    0.41   1
   4   8  -2    1.70    0.33  -2
  -4  -8  -4    1.70    0.33   1
   4   8  -2    1.59    0.31  -2
  -4  -8  -4    1.59    0.31   1
   4   8  -2    2.32    0.37  -2
  -4  -8  -4    2.32    0.37   1
  -4  -8   2    1.11    0.28  -2
   4   8   4    1.11    0.28   1
  -5  -8  -4    0.04    0.28   1
  -5  -8  -4   -0.09    0.15   1
  -1   9  -3    0.87    0.36  -2
   1  -9  -4    0.87    0.36   1
  -1   9  -3    0.22    0.14  -2
   1  -9  -4    0.22    0.14   1
  -1   9  -3    0.82    0.33  -2
   1  -9  -4    0.82    0.33   1
   1  -9   3    0.48    0.33  -2
  -1   9   4    0.48    0.33   1
   0   9  -3   -0.11    0.32  -2
   0  -9  -4   -0.11    0.32   1
   0   9  -3   -0.12    0.24  -2
   0  -9  -4   -0.12    0.24   1
   0   9  -3    0.35    0.28  -2
   0  -9  -4    0.35    0.28   1
   0  -9   3    0.39    0.28  -2
   0   9   4    0.39    0.28   1
  -1  -9  -4    0.07    0.26   1
  -1  -9  -4   -0.03    0.28   1
  -1  -9  -4    0.43    0.26   1
   1   9   4    0.18    0.28   1
  -2  -9  -4    3.70    0.45   1
  -2  -9  -4    3.56    0.46   1
  -2  -9  -4    3.00    0.45   1
   3   9  -2    1.21    0.34  -2
  -3  -9  -4    1.21    0.34   1
   3   9  -2    1.74    0.35  -2
  -3  -9  -4    1.74    0.35   1
   2   9  -5    1.02    0.38   1
  -2  -9   5    0.59    0.30   1
  -2  -9   5    0.46    0.31   1
  -2  -9   5    0.04    0.29   1
   1   9  -5    2.47    0.39   1
  -1  -9   5    1.18    0.40   1
  -1  -9   5    1.21    0.34   1
  -1  -9   5    1.87    0.34   1
   0  -9  -6    0.02    0.18  -2
   0   9  -5    0.02    0.18   1
   0   9   6    0.35    0.34  -2
   0  -9   5    0.35    0.34   1
   0   9   6    0.44    0.29  -2
   0  -9   5    0.44    0.29   1
  -1   9   6    0.74    0.32  -2
   1  -9   5    0.74    0.32   1
  -1   9   6    0.55    0.29  -2
   1  -9   5    0.55    0.29   1
  -4  -8  -7    0.47    0.38  -2
   4   8  -5    0.47    0.38   1
   4   8   7    1.19    0.30  -2
  -4  -8   5    1.19    0.30   1
   4   8   7    1.06    0.34  -2
  -4  -8   5    1.06    0.34   1
   4   8   7    0.67    0.32  -2
  -4  -8   5    0.67    0.32   1
  -3  -8  -7    2.80    0.46  -2
   3   8  -5    2.80    0.46   1
   3   8   7    2.56    0.37  -2
  -3  -8   5    2.56    0.37   1
   3   8   7    2.32    0.40  -2
  -3  -8   5    2.32    0.40   1
   3   8   7    2.68    0.43  -2
  -3  -8   5    2.68    0.43   1
   2   8  -5    0.41    0.29   1
  -2  -8   5   -0.04    0.24   1
  -2  -8   5    0.04    0.25   1
  -2  -8   5    0.04    0.25   1
  -2  -8   5    0.18    0.28   1
   1   8  -5    0.26    0.27   1
  -1  -8   5    0.51    0.24   1
  -1  -8   5    0.22    0.24   1
  -1  -8   5    0.29    0.26   1
  -1  -8   5   -0.23    0.29   1
   0  -8  -6    1.47    0.30  -2
   0   8  -5    1.47    0.30   1
   0   8   6    1.08    0.30  -2
   0  -8   5    1.08    0.30   1
   0   8   6    0.81    0.27  -2
   0  -8   5    0.81    0.27   1
  -1   8  -5    0.09    0.16   1
   1  -8   5    0.51    0.31   1
   1  -8   5    0.83    0.28   1
  -2   8  -5    0.21    0.33   1
   2  -8   5    0.29    0.26   1
   2  -8   5    0.25    0.31   1
  -3   8  -5    0.54    0.37   1
   3  -8   5    0.41    0.34   1
   3  -8   5    0.47    0.31   1
   5   7  -5    1.01    0.35   1
  -5  -7   5    0.59    0.25   1
  -5  -7   5    0.99    0.35   1
  -5  -7   5    0.80    0.24   1
  -4  -7  -7   -0.06    0.28  -2
   4   7  -5   -0.06    0.28   1
   4   7   7    0.42    0.24  -2
  -4  -7   5    0.42    0.24   1
   4   7   7    0.23    0.22  -2
  -4  -7   5    0.23    0.22   1
   4   7   7    0.23    0.28  -2
  -4  -7   5    0.23    0.28   1
   3   7  -5    1.33    0.36   1
  -3  -7   5    1.43    0.32   1
  -3  -7   5    0.99    0.28   1
  -3  -7   5    1.53    0.29   1
   2   7  -5    1.60    0.31   1
  -2  -7   5    0.51    0.24   1
  -2  -7   5    0.71    0.27   1
  -2  -7   5    0.72    0.26   1
   1   7  -5    1.15    0.30   1
  -1  -7   5    1.71    0.29   1
  -1  -7   5    1.60    0.28   1
  -1  -7   5    1.96    0.28   1
   0  -7  -6    1.65    0.27  -2
   0   7  -5    1.65    0.27   1
   0   7   6    1.35    0.25  -2
   0  -7   5    1.35    0.25   1
   0   7   6    1.17    0.29  -2
   0  -7   5    1.17    0.29   1
  -1   7  -5    0.13    0.23   1
   1  -7   5    0.33    0.23   1
   1  -7   5    0.13    0.25   1
  -2   7  -5    0.27    0.30   1
   2  -7   5    0.05    0.27   1
   2  -7   5    0.32    0.27   1
   3  -7  -5   -0.11    0.30  -2
  -3   7  -5   -0.11    0.30   1
  -3   7   5    0.39    0.32  -2
   3  -7   5    0.39    0.32   1
  -3   7   5    0.27    0.32  -2
   3  -7   5    0.27    0.32   1
  -4   7  -5    0.73    0.42   1
   4  -7   5    0.45    0.33   1
   4  -7   5    0.76    0.38   1
   6   6  -5   -0.20    0.30   1
  -6  -6   5    0.06    0.24   1
  -6  -6   5    0.53    0.32   1
   5   6  -5    1.15    0.30   1
  -5  -6   5    0.63    0.23   1
  -5  -6   5    0.66    0.31   1
  -4  -6  -7    3.15    0.46  -2
   4   6  -5    3.15    0.46   1
   4   6   7    2.69    0.35  -2
  -4  -6   5    2.69    0.35   1
   4   6   7    3.50    0.45  -2
  -4  -6   5    3.50    0.45   1
   4   6   7    2.79    0.38  -2
  -4  -6   5    2.79    0.38   1
   3   6  -5    0.84    0.30   1
  -3  -6   5    0.44    0.23   1
  -3  -6   5    1.03    0.26   1
  -3  -6   5    0.58    0.26   1
   2   6  -5    0.67    0.26   1
  -2  -6   5    0.80    0.26   1
  -2  -6   5    0.72    0.25   1
  -2  -6   5    0.64    0.24   1
  -1  -6  -6    4.61    0.47  -2
   1   6  -5    4.61    0.47   1
   1   6   6    3.77    0.46  -2
  -1  -6   5    3.77    0.46   1
   1   6   6    4.46    0.45  -2
  -1  -6   5    4.46    0.45   1
   1   6   6    4.65    0.49  -2
  -1  -6   5    4.65    0.49   1
   0   6  -5    3.29    0.36   1
   0  -6   5    2.81    0.37   1
   0  -6   5    3.54    0.36   1
  -1   6  -5   -0.10    0.20   1
   1  -6   5    0.42    0.22   1
   1  -6   5   -0.08    0.20   1
  -2   6  -5   -0.14    0.23   1
   2  -6   5   -0.25    0.23   1
   2  -6   5   -0.11    0.24   1
   3  -6  -5    0.39    0.30  -2
  -3   6  -5    0.39    0.30   1
  -3   6   5    0.14    0.26  -2
   3  -6   5    0.14    0.26   1
  -3   6   5    0.03    0.24  -2
   3  -6   5    0.03    0.24   1
  -4   6  -5   -0.31    0.32   1
   4  -6   5    0.04    0.26   1
   4  -6   5    0.44    0.29   1
  -5   6  -5   -0.08    0.36   1
   5  -6   5    0.27    0.33   1
   5  -6   5    0.07    0.31   1
   5  -6   5   -0.14    0.34   1
   6   5  -5    1.47    0.34   1
  -6  -5   5    0.72    0.31   1
  -6  -5   5    0.70    0.26   1
  -5  -5  -7    2.03    0.34  -2
   5   5  -5    2.03    0.34   1
   5   5   7    1.43    0.30  -2
  -5  -5   5    1.43    0.30   1
   5   5   7    1.56    0.33  -2
  -5  -5   5    1.56    0.33   1
   4   5  -5    2.92    0.39   1
  -4  -5   5    2.73    0.37   1
  -4  -5   5    2.73    0.37   1
  -4  -5   5    1.98    0.29   1
   3   5  -5    0.77    0.25   1
  -3  -5   5    0.37    0.19   1
  -3  -5   5    0.71    0.25   1
  -3  -5   5    0.61    0.23   1
   2   5  -5    4.00    0.45   1
  -2  -5   5    3.66    0.44   1
  -2  -5   5    4.03    0.44   1
  -2  -5   5    4.40    0.43   1
  -1  -5  -6    6.48    0.64  -2
   1   5  -5    6.48    0.64   1
  -1  -5  -6    8.42    0.66  -2
   1   5  -5    8.42    0.66   1
   1   5   6    8.90    0.67  -2
  -1  -5   5    8.90    0.67   1
   1   5   6    6.73    0.64  -2
  -1  -5   5    6.73    0.64   1
   0  -5   5    0.37    0.18   1
   0  -5   5    0.14    0.16   1
  -1   5  -5   -0.14    0.17   1
   1  -5   5    0.01    0.16   1
   1  -5   5    0.41    0.20   1
   1  -5   5    0.07    0.19   1
   2  -5  -5    0.16    0.24  -2
  -2   5  -5    0.16    0.24   1
  -2   5   5    0.11    0.21  -2
   2  -5   5    0.11    0.21   1
  -2   5   5   -0.10    0.19  -2
   2  -5   5   -0.10    0.19   1
  -3   5  -5    3.04    0.42   1
   3  -5   5    3.07    0.36   1
   3  -5   5    2.73    0.38   1
  -4   5  -5    0.82    0.33   1
  -4   5  -5    1.13    0.25   1
   4  -5   5    0.98    0.27   1
   4  -5   5    0.66    0.26   1
  -5   5  -5    0.43    0.29   1
  -5   5  -5   -0.05    0.33   1
   5  -5   5    0.12    0.26   1
   5  -5   5    0.17    0.30   1
   5  -5   5    0.39    0.27   1
   6  -5  -4    0.58    0.35  -2
  -6   5  -5    0.58    0.35   1
   6  -5  -4    0.67    0.41  -2
  -6   5  -5    0.67    0.41   1
  -6   5   4    1.39    0.41  -2
   6  -5   5    1.39    0.41   1
  -6   5   4    0.80    0.38  -2
   6  -5   5    0.80    0.38   1
   7   4  -5   -0.28    0.24   1
   7   4  -5    0.30    0.30   1
  -7  -4   5    0.42    0.27   1
   6   4  -5   -0.12    0.26   1
  -6  -4   5    0.13    0.25   1
  -6  -4   5   -0.09    0.25   1
  -5  -4  -7    2.50    0.37  -2
   5   4  -5    2.50    0.37   1
   5   4   7    1.82    0.31  -2
  -5  -4   5    1.82    0.31   1
   5   4   7    1.55    0.27  -2
  -5  -4   5    1.55    0.27   1
   5   4   7    1.98    0.34  -2
  -5  -4   5    1.98    0.34   1
   4   4  -5    0.99    0.25   1
  -4  -4   5    0.53    0.24   1
  -4  -4   5    0.39    0.15   1
  -4  -4   5    0.72    0.23   1
   3   4  -5    1.36    0.24   1
   3   4  -5    0.85    0.15   1
  -3  -4   5    1.31    0.23   1
  -3  -4   5    1.01    0.24   1
  -3  -4   5    1.07    0.20   1
  -2  -4  -6   10.37    0.85  -2
   2   4  -5   10.37    0.85   1
   2   4   6    9.87    0.85  -2
  -2  -4   5    9.87    0.85   1
   2   4   6   10.64    0.84  -2
  -2  -4   5   10.64    0.84   1
   2   4   6    9.44    0.84  -2
  -2  -4   5    9.44    0.84   1
   1   4  -5   10.86    0.86   1
   1   4  -5   10.61    0.83   1
   1   4  -5   10.22    0.85   1
  -1  -4   5   10.86    0.85   1
  -1  -4   5   10.26    0.86   1
  -1  -4   5    9.78    0.87   1
   0   4  -5    0.09    0.13   1
   0   4  -5   -0.12    0.15   1
   0  -4   5    0.04    0.16   1
   0  -4   5    0.04    0.16   1
  -1   4  -5    0.52    0.18   1
   1  -4   5    0.40    0.17   1
   1  -4   5    0.34    0.17   1
   1  -4   5    0.38    0.15   1
   2  -4  -5   -0.08    0.19  -2
  -2   4  -5   -0.08    0.19   1
  -2   4   5   -0.03    0.17  -2
   2  -4   5   -0.03    0.17   1
  -2   4   5    0.08    0.16  -2
   2  -4   5    0.08    0.16   1
  -3   4  -5    0.20    0.24   1
   3  -4   5    0.12    0.20   1
   3  -4   5    0.11    0.19   1
  -4   4  -5    0.33    0.23   1
  -4   4  -5    0.05    0.28   1
   4  -4   5   -0.19    0.23   1
   4  -4   5    0.04    0.19   1
   4  -4   5    0.08    0.22   1
   5  -4  -4   -0.18    0.26  -2
  -5   4  -5   -0.18    0.26   1
   5  -4  -4    0.58    0.32  -2
  -5   4  -5    0.58    0.32   1
  -5   4   4    0.23    0.20  -2
   5  -4   5    0.23    0.20   1
  -5   4   4    0.50    0.25  -2
   5  -4   5    0.50    0.25   1
  -6   4  -5    0.32    0.33   1
  -6   4  -5    0.03    0.33   1
   6  -4   5    0.07    0.28   1
   6  -4   5    0.24    0.31   1
   7   3  -5    1.05    0.31   1
   7   3  -5    0.77    0.26   1
  -7  -3   5    0.18    0.28   1
  -7  -3   5    0.41    0.25   1
  -6  -3  -7    3.51    0.41  -2
   6   3  -5    3.51    0.41   1
  -6  -3  -7    3.01    0.39  -2
   6   3  -5    3.01    0.39   1
   6   3   7    2.62    0.39  -2
  -6  -3   5    2.62    0.39   1
   6   3   7    2.60    0.37  -2
  -6  -3   5    2.60    0.37   1
   5   3  -5    2.52    0.32   1
   5   3  -5    2.23    0.35   1
  -5  -3   5    2.40    0.37   1
  -5  -3   5    2.68    0.32   1
  -5  -3   5    2.48    0.35   1
   4   3  -5    1.27    0.21   1
   4   3  -5    1.39    0.26   1
  -4  -3   5    0.67    0.23   1
  -4  -3   5    1.12    0.24   1
  -4  -3   5    1.17    0.22   1
   3   3  -5    4.85    0.40   1
   3   3  -5    4.94    0.45   1
   3   3  -5    4.58    0.41   1
  -3  -3   5    4.18    0.41   1
  -3  -3   5    4.29    0.41   1
  -3  -3   5    4.54    0.46   1
  -3  -3   5    4.27    0.46   1
  -2  -3  -6   18.96    1.40  -2
   2   3  -5   18.96    1.40   1
  -2  -3  -6   18.38    1.40  -2
   2   3  -5   18.38    1.40   1
  -2  -3  -6   19.05    1.39  -2
   2   3  -5   19.05    1.39   1
   2   3   6   17.51    1.41  -2
  -2  -3   5   17.51    1.41   1
   2   3   6   17.55    1.38  -2
  -2  -3   5   17.55    1.38   1
   2   3   6   14.85    1.40  -2
  -2  -3   5   14.85    1.40   1
   1   3  -5    0.23    0.14   1
  -1  -3   5    0.03    0.17   1
  -1  -3   5    0.05    0.16   1
  -1  -3   5    0.42    0.14   1
   0   3  -5    1.70    0.22   1
   0   3  -5    1.64    0.22   1
   0   3  -5    1.77    0.20   1
   0  -3   5    2.06    0.23   1
   0  -3   5    1.71    0.24   1
   1  -3  -5    0.86    0.17  -2
  -1   3  -5    0.86    0.17   1
   1  -3  -5    0.71    0.19  -2
  -1   3  -5    0.71    0.19   1
   1  -3  -5    0.67    0.19  -2
  -1   3  -5    0.67    0.19   1
  -1   3   5    1.00    0.18  -2
   1  -3   5    1.00    0.18   1
  -1   3   5    1.26    0.20  -2
   1  -3   5    1.26    0.20   1
  -1   3   5    1.13    0.19  -2
   1  -3   5    1.13    0.19   1
  -2   3  -5    6.78    0.62   1
  -2   3  -5    6.64    0.60   1
   2  -3   5    7.10    0.61   1
   2  -3   5    6.98    0.61   1
   2  -3   5    7.46    0.61   1
  -3   3  -5    0.87    0.19   1
  -3   3  -5    0.82    0.18   1
  -3   3  -5    0.95    0.24   1
   3  -3   5    0.51    0.20   1
   3  -3   5    0.78    0.18   1
   3  -3   5    0.79    0.21   1
   3  -3   5    0.97    0.18   1
  -4   3  -5    0.34    0.24   1
  -4   3  -5    0.19    0.16   1
  -4   3  -5    0.37    0.20   1
   4  -3   5    0.27    0.20   1
   4  -3   5    0.20    0.17   1
   5  -3  -4    1.43    0.35  -2
  -5   3  -5    1.43    0.35   1
   5  -3  -4    1.38    0.28  -2
  -5   3  -5    1.38    0.28   1
  -5   3   4    1.52    0.30  -2
   5  -3   5    1.52    0.30   1
  -5   3   4    1.31    0.30  -2
   5  -3   5    1.31    0.30   1
  -6   3  -5    1.47    0.37   1
  -6   3  -5    0.60    0.31   1
   6  -3   5    1.08    0.28   1
   6  -3   5    0.87    0.30   1
  -7   3  -5    1.48    0.45   1
  -7   3  -5    0.60    0.36   1
   7  -3   5    0.71    0.34   1
   7  -3   5    1.01    0.33   1
   7   2  -5    0.01    0.25   1
   7   2  -5    0.21    0.24   1
  -7  -2   5   -0.02    0.22   1
  -7  -2   5   -0.06    0.26   1
  -7  -2   5    0.62    0.33   1
  -6  -2  -7    1.43    0.28  -2
   6   2  -5    1.43    0.28   1
  -6  -2  -7    1.38    0.29  -2
   6   2  -5    1.38    0.29   1
   6   2   7    0.69    0.29  -2
  -6  -2   5    0.69    0.29   1
   6   2   7    1.27    0.26  -2
  -6  -2   5    1.27    0.26   1
   6   2   7    1.27    0.28  -2
  -6  -2   5    1.27    0.28   1
   5   2  -5   -0.05    0.20   1
   5   2  -5    0.45    0.19   1
   5   2  -5    0.38    0.12   1
  -5  -2   5   -0.10    0.16   1
  -5  -2   5    0.17    0.20   1
  -5  -2   5    0.07    0.22   1
   4   2  -5    0.29    0.19   1
   4   2  -5    0.27    0.16   1
  -4  -2   5    0.49    0.18   1
  -4  -2   5    0.15    0.18   1
  -3  -2  -6   10.15    0.77  -2
   3   2  -5   10.15    0.77   1
  -3  -2  -6    9.59    0.78  -2
   3   2  -5    9.59    0.78   1
  -3  -2  -6    9.32    0.80  -2
   3   2  -5    9.32    0.80   1
  -3  -2  -6    9.73    0.77  -2
   3   2  -5    9.73    0.77   1
   3   2   6    9.68    0.78  -2
  -3  -2   5    9.68    0.78   1
   3   2   6    9.77    0.81  -2
  -3  -2   5    9.77    0.81   1
   3   2   6    9.24    0.79  -2
  -3  -2   5    9.24    0.79   1
   3   2   6    9.37    0.78  -2
  -3  -2   5    9.37    0.78   1
   2   2  -5    9.52    0.74   1
   2   2  -5    9.58    0.77   1
   2   2  -5    9.39    0.73   1
   2   2  -5    9.40    0.77   1
  -2  -2   5    8.96    0.75   1
  -2  -2   5    8.17    0.76   1
  -2  -2   5    9.01    0.76   1
  -2  -2   5    9.44    0.78   1
  -2  -2   5    9.57    0.74   1
   1   2  -5    0.40    0.13   1
   1   2  -5    0.39    0.11   1
   1   2  -5    0.50    0.14   1
   1   2  -5    0.39    0.14   1
  -1  -2   5    0.30    0.15   1
  -1  -2   5    0.41    0.17   1
  -1  -2   5    0.35    0.13   1
  -1  -2   5    0.42    0.10   1
   0   2  -5    1.50    0.18   1
   0   2  -5    1.57    0.18   1
   0   2  -5    1.60    0.18   1
   0   2  -5    1.65    0.18   1
   0  -2   5    1.59    0.20   1
   0  -2   5    1.35    0.21   1
   0  -2   5    1.58    0.19   1
   0  -2   5    1.51    0.19   1
   1  -2  -5    0.36    0.12  -2
  -1   2  -5    0.36    0.12   1
   1  -2  -5    0.21    0.15  -2
  -1   2  -5    0.21    0.15   1
   1  -2  -5    0.23    0.13  -2
  -1   2  -5    0.23    0.13   1
  -1   2   5    0.38    0.15  -2
   1  -2   5    0.38    0.15   1
  -1   2   5    0.20    0.16  -2
   1  -2   5    0.20    0.16   1
  -1   2   5    0.25    0.14  -2
   1  -2   5    0.25    0.14   1
  -1   2   5    0.47    0.15  -2
   1  -2   5    0.47    0.15   1
  -2   2  -5   -0.01    0.13   1
  -2   2  -5    0.07    0.13   1
  -2   2  -5    0.29    0.18   1
  -2   2  -5    0.22    0.19   1
   2  -2   5    0.21    0.16   1
   2  -2   5    0.25    0.16   1
   2  -2   5    0.18    0.19   1
   2  -2   5    0.32    0.17   1
  -3   2  -5    0.20    0.15   1
  -3   2  -5    0.29    0.16   1
  -3   2  -5    0.33    0.16   1
  -3   2  -5    0.34    0.19   1
   3  -2   5    0.26    0.19   1
   3  -2   5    0.41    0.17   1
   3  -2   5    0.63    0.15   1
   3  -2   5    0.25    0.15   1
   4  -2  -4    0.33    0.20  -2
  -4   2  -5    0.33    0.20   1
   4  -2  -4    0.55    0.18  -2
  -4   2  -5    0.55    0.18   1
   4  -2  -4    0.87    0.25  -2
  -4   2  -5    0.87    0.25   1
  -4   2   4    0.73    0.19  -2
   4  -2   5    0.73    0.19   1
  -4   2   4    0.71    0.22  -2
   4  -2   5    0.71    0.22   1
  -5   2  -5    0.54    0.30   1
  -5   2  -5    0.53    0.23   1
   5  -2   5    0.11    0.19   1
   5  -2   5    0.58    0.23   1
  -6   2  -5    1.98    0.38   1
  -6   2  -5    1.60    0.32   1
   6  -2   5    1.64    0.30   1
   6  -2   5    1.47    0.30   1
  -7   2  -5   -0.19    0.29   1
  -7   2  -5    0.06    0.33   1
   7  -2   5   -0.14    0.28   1
   7  -2   5    0.15    0.25   1
  -7  -1  -7    2.05    0.37  -2
   7   1  -5    2.05    0.37   1
  -7  -1  -7    1.76    0.32  -2
   7   1  -5    1.76    0.32   1
   7   1   7    1.95    0.35  -2
  -7  -1   5    1.95    0.35   1
   7   1   7    2.08    0.34  -2
  -7  -1   5    2.08    0.34   1
   6   1  -5    0.95    0.25   1
   6   1  -5    0.94    0.26   1
  -6  -1   5    1.05    0.26   1
  -6  -1   5    0.43    0.28   1
  -6  -1   5    0.92    0.25   1
   5   1  -5    2.47    0.33   1
   5   1  -5    2.81    0.33   1
  -5  -1   5    1.98    0.34   1
  -5  -1   5    2.17    0.33   1
   4   1  -5    2.07    0.25   1
   4   1  -5    1.97    0.26   1
   4   1  -5    1.70    0.23   1
  -4  -1   5    2.01    0.26   1
  -4  -1   5    1.58    0.27   1
  -4  -1   5    2.12    0.29   1
  -3  -1  -6   13.24    1.09  -2
   3   1  -5   13.24    1.09   1
  -3  -1  -6   14.97    1.09  -2
   3   1  -5   14.97    1.09   1
  -3  -1  -6   14.49    1.11  -2
   3   1  -5   14.49    1.11   1
  -3  -1  -6   14.16    1.11  -2
   3   1  -5   14.16    1.11   1
  -3  -1  -6   14.56    1.09  -2
   3   1  -5   14.56    1.09   1
  -3  -1  -6   12.05    1.10  -2
   3   1  -5   12.05    1.10   1
   3   1   6   12.03    1.11  -2
  -3  -1   5   12.03    1.11   1
   3   1   6   14.78    1.11  -2
  -3  -1   5   14.78    1.11   1
   3   1   6   13.97    1.09  -2
  -3  -1   5   13.97    1.09   1
   3   1   6   13.77    1.10  -2
  -3  -1   5   13.77    1.10   1
   2   1  -5    1.33    0.17   1
   2   1  -5    1.53    0.17   1
   2   1  -5    1.48    0.22   1
  -2  -1   5    1.54    0.23   1
  -2  -1   5    1.36    0.20   1
  -2  -1   5    2.14    0.22   1
   1   1  -5    2.47    0.24   1
   1   1  -5    2.03    0.23   1
   1   1  -5    2.44    0.25   1
  -1  -1   5    2.25    0.22   1
  -1  -1   5    2.16    0.22   1
  -1  -1   5    2.48    0.25   1
  -1  -1   5    2.09    0.25   1
   0  -1  -5    7.60    0.66  -2
   0   1  -5    7.60    0.66   1
   0  -1  -5    8.87    0.65  -2
   0   1  -5    8.87    0.65   1
   0  -1  -5    8.71    0.66  -2
   0   1  -5    8.71    0.66   1
   0  -1  -5    8.29    0.66  -2
   0   1  -5    8.29    0.66   1
   0   1   5    7.47    0.66  -2
   0  -1   5    7.47    0.66   1
   0   1   5    7.88    0.66  -2
   0  -1   5    7.88    0.66   1
   0   1   5    8.29    0.65  -2
   0  -1   5    8.29    0.65   1
   0   1   5    8.25    0.67  -2
   0  -1   5    8.25    0.67   1
  -1   1  -5   15.51    1.14   1
  -1   1  -5   14.06    1.13   1
  -1   1  -5   14.50    1.14   1
   1  -1   5   14.31    1.14   1
   1  -1   5   14.05    1.14   1
   1  -1   5   14.96    1.14   1
   1  -1   5   14.34    1.14   1
  -2   1  -5    0.12    0.17   1
  -2   1  -5    0.17    0.13   1
  -2   1  -5    0.14    0.12   1
  -2   1  -5    0.01    0.16   1
   2  -1   5   -0.07    0.12   1
   2  -1   5    0.24    0.15   1
   2  -1   5   -0.07    0.14   1
   2  -1   5    0.18    0.17   1
   2  -1   5    0.16    0.16   1
  -3   1  -5    0.95    0.22   1
  -3   1  -5    0.74    0.19   1
  -3   1  -5    0.97    0.18   1
  -3   1  -5    1.05    0.15   1
   3  -1   5    0.82    0.16   1
   3  -1   5    0.97    0.20   1
   3  -1   5    0.95    0.19   1
   3  -1   5    0.87    0.19   1
   3  -1   5    1.10    0.19   1
   4  -1  -4    1.37    0.25  -2
  -4   1  -5    1.37    0.25   1
   4  -1  -4    2.06    0.30  -2
  -4   1  -5    2.06    0.30   1
  -4   1   4    1.57    0.22  -2
   4  -1   5    1.57    0.22   1
  -4   1   4    1.78    0.25  -2
   4  -1   5    1.78    0.25   1
  -5   1  -5    1.42    0.26   1
  -5   1  -5    1.62    0.31   1
   5  -1   5    1.26    0.24   1
   5  -1   5    1.13    0.23   1
  -6   1  -5    0.69    0.27   1
  -6   1  -5    1.06    0.31   1
   6  -1   5    0.73    0.20   1
   6  -1   5    0.83    0.22   1
   6  -1   5    0.48    0.23   1
   7  -1  -3    0.33    0.31  -2
  -7   1  -5    0.33    0.31   1
   7  -1  -3    0.19    0.33  -2
  -7   1  -5    0.19    0.33   1
  -7   1   3    0.13    0.20  -2
   7  -1   5    0.13    0.20   1
  -7   1   3   -0.16    0.24  -2
   7  -1   5   -0.16    0.24   1
  -7   1   3    0.15    0.23  -2
   7  -1   5    0.15    0.23   1
  -7   0  -7    0.76    0.25  -2
   7   0  -5    0.76    0.25   1
  -7   0  -7    0.73    0.30  -2
   7   0  -5    0.73    0.30   1
   7   0   7    0.74    0.32  -2
  -7   0   5    0.74    0.32   1
   7   0   7    0.46    0.28  -2
  -7   0   5    0.46    0.28   1
   6   0  -5    0.24    0.26   1
   6   0  -5    0.43    0.24   1
  -6   0   5   -0.08    0.26   1
  -6   0   5    0.45    0.26   1
   5   0  -5    0.31    0.22   1
   5   0  -5    0.47    0.21   1
  -5   0   5   -0.02    0.23   1
  -5   0   5    0.24    0.26   1
  -5   0   5    0.56    0.24   1
  -4   0  -6    3.67    0.35  -2
   4   0  -5    3.67    0.35   1
  -4   0  -6    3.16    0.35  -2
   4   0  -5    3.16    0.35   1
  -4   0  -6    3.08    0.36  -2
   4   0  -5    3.08    0.36   1
   4   0   6    3.20    0.36  -2
  -4   0   5    3.20    0.36   1
   4   0   6    3.86    0.39  -2
  -4   0   5    3.86    0.39   1
   4   0   6    2.87    0.35  -2
  -4   0   5    2.87    0.35   1
   3   0  -5    1.22    0.19   1
   3   0  -5    1.40    0.21   1
   3   0  -5    1.26    0.17   1
   3   0  -5    1.61    0.23   1
   3   0  -5    1.58    0.21   1
   3   0  -5    1.22    0.21   1
  -3   0   5    1.29    0.23   1
  -3   0   5    1.28    0.24   1
  -3   0   5    1.06    0.22   1
  -3   0   5    1.17    0.23   1
   2   0  -5    0.91    0.15   1
   2   0  -5    1.08    0.18   1
   2   0  -5    0.97    0.17   1
   2   0  -5    1.22    0.16   1
  -2   0   5    0.72    0.19   1
  -2   0   5    0.89    0.20   1
  -2   0   5    0.81    0.16   1
  -2   0   5    0.55    0.17   1
  -2   0   5    0.79    0.19   1
   1   0  -5    0.91    0.15   1
   1   0  -5    0.90    0.13   1
   1   0  -5    0.86    0.12   1
   1   0  -5    1.17    0.17   1
  -1   0   5    0.89    0.15   1
  -1   0   5    0.77    0.13   1
  -1   0   5    0.84    0.15   1
  -1   0   5    0.77    0.16   1
   0   0  -5    0.68    0.13  -2
   0   0  -5    0.68    0.13   1
   0   0  -5    0.93    0.14  -2
   0   0  -5    0.93    0.14   1
   0   0  -5    1.29    0.14  -2
   0   0  -5    1.29    0.14   1
   0   0  -5    0.83    0.14  -2
   0   0  -5    0.83    0.14   1
   0   0   5    0.83    0.14  -2
   0   0   5    0.83    0.14   1
   0   0   5    1.01    0.16  -2
   0   0   5    1.01    0.16   1
   0   0   5    1.04    0.16  -2
   0   0   5    1.04    0.16   1
   0   0   5    0.84    0.15  -2
   0   0   5    0.84    0.15   1
  -1   0  -5   -0.05    0.11   1
  -1   0  -5    0.10    0.13   1
  -1   0  -5    0.04    0.10   1
  -1   0  -5    0.10    0.11   1
  -1   0  -5   -0.06    0.11   1
   1   0   5    0.14    0.11   1
   1   0   5    0.02    0.11   1
   1   0   5   -0.11    0.12   1
   1   0   5   -0.05    0.13   1
  -2   0  -5    0.65    0.14   1
  -2   0  -5    0.36    0.15   1
  -2   0  -5    0.59    0.13   1
  -2   0  -5    0.33    0.11   1
  -2   0  -5    0.10    0.10   1
   2   0   5    0.41    0.15   1
   2   0   5    0.42    0.15   1
   2   0   5    0.49    0.14   1
   2   0   5    0.39    0.13   1
   2   0   5    0.42    0.14   1
   2   0   5    0.50    0.15   1
  -3   0  -5    1.18    0.21   1
  -3   0  -5    1.28    0.16   1
  -3   0  -5    0.82    0.14   1
  -3   0  -5    1.06    0.19   1
  -3   0  -5    1.05    0.20   1
   3   0   5    0.42    0.20   1
   3   0   5    0.97    0.18   1
   3   0   5    0.73    0.18   1
   3   0   5    0.53    0.17   1
   3   0   5    1.14    0.21   1
   4   0  -4    2.12    0.28  -2
  -4   0  -5    2.12    0.28   1
   4   0  -4    1.44    0.21  -2
  -4   0  -5    1.44    0.21   1
  -4   0   4    2.25    0.24  -2
   4   0   5    2.25    0.24   1
  -4   0   4    2.04    0.24  -2
   4   0   5    2.04    0.24   1
  -4   0   4    1.26    0.19  -2
   4   0   5    1.26    0.19   1
  -5   0  -5    0.03    0.18   1
  -5   0  -5   -0.03    0.25   1
   5   0   5    0.48    0.19   1
   5   0   5    0.10    0.18   1
   5   0   5    0.18    0.14   1
   5   0   5    0.24    0.14   1
  -6   0  -5    0.15    0.21   1
  -6   0  -5    0.06    0.26   1
   6   0   5   -0.08    0.21   1
   6   0   5    0.22    0.21   1
   6   0   5    0.19    0.17   1
   7   0  -3   16.81    1.24  -2
  -7   0  -5   16.81    1.24   1
  -7   0   3   13.85    1.20  -2
   7   0   5   13.85    1.20   1
  -7   0   3   12.68    1.19  -2
   7   0   5   12.68    1.19   1
  -7   1  -7    0.25    0.22  -2
   7  -1  -5    0.25    0.22   1
  -7   1  -7   -0.02    0.28  -2
   7  -1  -5   -0.02    0.28   1
   7  -1   7   -0.16    0.31  -2
  -7   1   5   -0.16    0.31   1
   7  -1   7    0.61    0.33  -2
  -7   1   5    0.61    0.33   1
   6  -1  -5    1.93    0.31   1
   6  -1  -5    2.46    0.30   1
   6  -1  -5    2.72    0.38   1
  -6   1   5    3.06    0.42   1
  -6   1   5    2.40    0.38   1
   5  -1  -5    0.18    0.24   1
  -5   1   5    0.02    0.25   1
  -5   1   5    0.32    0.24   1
  -4   1  -6    5.39    0.50  -2
   4  -1  -5    5.39    0.50   1
  -4   1  -6    4.69    0.45  -2
   4  -1  -5    4.69    0.45   1
  -4   1  -6    4.60    0.44  -2
   4  -1  -5    4.60    0.44   1
  -4   1  -6    4.71    0.47  -2
   4  -1  -5    4.71    0.47   1
   4  -1   6    5.03    0.51  -2
  -4   1   5    5.03    0.51   1
   4  -1   6    5.52    0.51  -2
  -4   1   5    5.52    0.51   1
   3  -1  -5    1.39    0.18   1
   3  -1  -5    1.25    0.18   1
   3  -1  -5    1.46    0.19   1
   3  -1  -5    1.66    0.24   1
   3  -1  -5    1.13    0.16   1
   3  -1  -5    0.96    0.15   1
  -3   1   5    0.92    0.23   1
  -3   1   5    0.87    0.20   1
  -3   1   5    0.54    0.20   1
  -3   1   5    0.55    0.21   1
  -3   1   5    0.73    0.22   1
   2  -1  -5    0.52    0.14   1
   2  -1  -5    0.29    0.15   1
   2  -1  -5    0.49    0.14   1
   2  -1  -5    0.90    0.19   1
  -2   1   5    0.58    0.21   1
  -2   1   5    0.41    0.18   1
  -2   1   5    0.28    0.19   1
  -2   1   5    0.48    0.18   1
   1  -1  -5   14.11    1.03   1
   1  -1  -5   12.46    1.03   1
   1  -1  -5   14.18    1.04   1
   1  -1  -5   12.40    1.03   1
  -1   1   5   12.23    1.04   1
  -1   1   5   13.62    1.04   1
  -1   1   5   13.35    1.05   1
  -1   1   5   13.21    1.04   1
   0   1  -5   10.56    0.71  -2
   0  -1  -5   10.56    0.71   1
   0  -1   5    8.62    0.72  -2
   0   1   5    8.62    0.72   1
   0  -1   5    8.23    0.73  -2
   0   1   5    8.23    0.73   1
   0  -1   5    7.98    0.72  -2
   0   1   5    7.98    0.72   1
  -1  -1  -5    0.02    0.11   1
  -1  -1  -5   -0.01    0.11   1
  -1  -1  -5    0.05    0.10   1
  -1  -1  -5    0.19    0.11   1
  -1  -1  -5    0.00    0.11   1
   1   1   5    0.10    0.14   1
   1   1   5    0.06    0.12   1
   1   1   5   -0.02    0.12   1
   1   1   5    0.05    0.11   1
   1   1   5    0.03    0.13   1
  -2  -1  -5    2.68    0.27   1
  -2  -1  -5    3.15    0.30   1
  -2  -1  -5    2.52    0.29   1
  -2  -1  -5    2.87    0.31   1
  -2  -1  -5    2.92    0.29   1
  -2  -1  -5    2.54    0.27   1
   2   1   5    2.85    0.28   1
   2   1   5    2.92    0.29   1
   2   1   5    2.64    0.30   1
   2   1   5    3.36    0.31   1
   2   1   5    3.07    0.30   1
   2   1   5    2.92    0.31   1
   3   1  -4    0.35    0.14  -2
  -3  -1  -5    0.35    0.14   1
   3   1  -4    0.37    0.10  -2
  -3  -1  -5    0.37    0.10   1
   3   1  -4    0.73    0.16  -2
  -3  -1  -5    0.73    0.16   1
  -3  -1   4    0.55    0.14  -2
   3   1   5    0.55    0.14   1
  -3  -1   4    0.89    0.21  -2
   3   1   5    0.89    0.21   1
  -3  -1   4    0.57    0.17  -2
   3   1   5    0.57    0.17   1
  -3  -1   4    0.59    0.15  -2
   3   1   5    0.59    0.15   1
  -3  -1   4    0.38    0.15  -2
   3   1   5    0.38    0.15   1
  -3  -1   4    0.54    0.16  -2
   3   1   5    0.54    0.16   1
  -3  -1   4    0.36    0.18  -2
   3   1   5    0.36    0.18   1
  -3  -1   4    0.22    0.17  -2
   3   1   5    0.22    0.17   1
  -3  -1   4    0.38    0.18  -2
   3   1   5    0.38    0.18   1
  -4  -1  -5    1.48    0.22   1
  -4  -1  -5    1.75    0.19   1
   4   1   5    1.84    0.22   1
   4   1   5    1.86    0.21   1
   4   1   5    1.78    0.23   1
   4   1   5    1.90    0.24   1
  -5  -1  -5    0.20    0.18   1
   5   1   5    0.47    0.19   1
   5   1   5    0.52    0.20   1
   5   1   5    0.38    0.18   1
  -6  -1  -5    0.90    0.25   1
   6   1   5    0.88    0.23   1
   6   1   5    1.17    0.25   1
   7   1  -3    0.56    0.27  -2
  -7  -1  -5    0.56    0.27   1
  -7  -1   3    0.15    0.24  -2
   7   1   5    0.15    0.24   1
  -7  -1   3    0.23    0.22  -2
   7   1   5    0.23    0.22   1
   7  -2  -5    0.04    0.15   1
  -7   2   5    0.98    0.37   1
  -7   2   5    0.86    0.33   1
   6  -2  -5    1.04    0.30   1
   6  -2  -5    0.97    0.25   1
  -6   2   5    1.40    0.34   1
  -6   2   5    1.32    0.36   1
   5  -2  -5    0.90    0.27   1
  -5   2   5    0.74    0.30   1
  -5   2   5    0.93    0.27   1
  -4   2  -6    0.15    0.15  -2
   4  -2  -5    0.15    0.15   1
  -4   2  -6    0.16    0.21  -2
   4  -2  -5    0.16    0.21   1
   4  -2   6    0.46    0.25  -2
  -4   2   5    0.46    0.25   1
   4  -2   6    0.10    0.23  -2
  -4   2   5    0.10    0.23   1
   3  -2  -5    0.59    0.18   1
   3  -2  -5    0.64    0.15   1
   3  -2  -5    0.74    0.18   1
  -3   2   5    0.54    0.24   1
  -3   2   5    0.57    0.21   1
  -3   2   5    0.72    0.22   1
  -3   2   5    0.50    0.20   1
   2  -2  -5    0.19    0.17   1
   2  -2  -5    0.05    0.13   1
   2  -2  -5    0.01    0.17   1
  -2   2   5   -0.22    0.20   1
  -2   2   5    0.03    0.20   1
  -2   2   5   -0.08    0.21   1
  -2   2   5    0.10    0.20   1
  -1   2  -5    0.79    0.16  -2
   1  -2  -5    0.79    0.16   1
  -1   2  -5    0.48    0.15  -2
   1  -2  -5    0.48    0.15   1
  -1   2  -5    0.67    0.15  -2
   1  -2  -5    0.67    0.15   1
  -1   2  -5    0.47    0.14  -2
   1  -2  -5    0.47    0.14   1
   1  -2   5    0.41    0.19  -2
  -1   2   5    0.41    0.19   1
   1  -2   5    0.60    0.18  -2
  -1   2   5    0.60    0.18   1
   1  -2   5    0.47    0.17  -2
  -1   2   5    0.47    0.17   1
   0  -2  -5    0.12    0.12   1
   0  -2  -5    0.33    0.13   1
   0  -2  -5    0.44    0.13   1
   0  -2  -5    0.23    0.11   1
   0  -2  -5    0.20    0.12   1
   0   2   5    0.25    0.16   1
   0   2   5    0.05    0.14   1
   0   2   5    0.03    0.16   1
  -1  -2  -5    0.60    0.15   1
  -1  -2  -5    0.44    0.14   1
  -1  -2  -5    0.59    0.14   1
  -1  -2  -5    0.66    0.13   1
  -1  -2  -5    0.32    0.13   1
   1   2   5    0.46    0.14   1
   1   2   5    0.49    0.16   1
   1   2   5    0.70    0.15   1
   1   2   5    0.18    0.16   1
   1   2   5    0.40    0.16   1
  -2  -2  -5    4.30    0.33   1
   2   2   5    3.89    0.37   1
   2   2   5    4.35    0.37   1
   2   2   5    2.74    0.36   1
   2   2   5    2.77    0.37   1
   3   2  -4    6.43    0.53  -2
  -3  -2  -5    6.43    0.53   1
   3   2  -4    6.51    0.52  -2
  -3  -2  -5    6.51    0.52   1
   3   2  -4    6.02    0.54  -2
  -3  -2  -5    6.02    0.54   1
  -3  -2   4    5.46    0.56  -2
   3   2   5    5.46    0.56   1
  -3  -2   4    6.07    0.54  -2
   3   2   5    6.07    0.54   1
  -3  -2   4    6.19    0.53  -2
   3   2   5    6.19    0.53   1
  -3  -2   4    5.55    0.54  -2
   3   2   5    5.55    0.54   1
  -3  -2   4    7.18    0.55  -2
   3   2   5    7.18    0.55   1
  -4  -2  -5    0.54    0.15   1
  -4  -2  -5    0.52    0.18   1
   4   2   5    0.51    0.17   1
   4   2   5    0.69    0.16   1
  -5  -2  -5    0.36    0.20   1
   5   2   5    0.68    0.20   1
   5   2   5    0.36    0.19   1
   6   2  -3   29.84    2.38  -2
  -6  -2  -5   29.84    2.38   1
  -6  -2   3   35.45    2.38  -2
   6   2   5   35.45    2.38   1
  -6  -2   3   28.70    2.38  -2
   6   2   5   28.70    2.38   1
  -6  -2   3   27.24    2.37  -2
   6   2   5   27.24    2.37   1
  -7  -2  -5   -0.21    0.24   1
   7   2   5    0.23    0.25   1
   7   2   5    0.37    0.26   1
   7   2   5    0.28    0.27   1
   7  -3  -5    1.61    0.32   1
  -7   3   5    1.85    0.59   1
  -7   3   5    2.57    0.49   1
   6  -3  -5    0.06    0.24   1
  -6   3   5    0.37    0.31   1
  -6   3   5    0.12    0.34   1
  -5   3  -6    1.11    0.22  -2
   5  -3  -5    1.11    0.22   1
  -5   3  -6    0.96    0.32  -2
   5  -3  -5    0.96    0.32   1
   5  -3   6    1.49    0.31  -2
  -5   3   5    1.49    0.31   1
   5  -3   6    1.24    0.36  -2
  -5   3   5    1.24    0.36   1
   4  -3  -5    0.44    0.26   1
  -4   3   5    0.36    0.26   1
  -4   3   5    0.46    0.27   1
  -4   3   5    0.16    0.22   1
   3  -3  -5    2.45    0.35   1
   3  -3  -5    3.00    0.33   1
  -3   3   5    2.87    0.34   1
  -3   3   5    3.00    0.34   1
  -3   3   5    3.67    0.38   1
  -3   3   5    1.87    0.33   1
   2  -3  -5    5.84    0.51   1
   2  -3  -5    3.87    0.50   1
   2  -3  -5    5.77    0.51   1
  -2   3   5    6.04    0.55   1
  -2   3   5    6.33    0.55   1
  -2   3   5    5.04    0.54   1
  -2   3   5    7.30    0.56   1
  -1   3  -5    1.17    0.22  -2
   1  -3  -5    1.17    0.22   1
  -1   3  -5    1.33    0.22  -2
   1  -3  -5    1.33    0.22   1
  -1   3  -5    1.57    0.21  -2
   1  -3  -5    1.57    0.21   1
   1  -3   5    1.27    0.24  -2
  -1   3   5    1.27    0.24   1
   1  -3   5    1.26    0.25  -2
  -1   3   5    1.26    0.25   1
   1  -3   5    1.54    0.26  -2
  -1   3   5    1.54    0.26   1
   0  -3  -5    0.27    0.15   1
   0  -3  -5    0.06    0.14   1
   0  -3  -5    0.25    0.16   1
   0  -3  -5   -0.07    0.14   1
   0   3   5    0.15    0.19   1
   0   3   5   -0.01    0.20   1
   0   3   5    0.15    0.20   1
  -1  -3  -5    3.02    0.30   1
  -1  -3  -5    2.75    0.32   1
  -1  -3  -5    3.16    0.30   1
  -1  -3  -5    2.84    0.29   1
   1   3   5    2.88    0.31   1
   1   3   5    3.24    0.32   1
   1   3   5    2.14    0.33   1
   1   3   5    2.97    0.33   1
   2   3  -4    0.07    0.15  -2
  -2  -3  -5    0.07    0.15   1
   2   3  -4    0.12    0.13  -2
  -2  -3  -5    0.12    0.13   1
   2   3  -4    0.04    0.10  -2
  -2  -3  -5    0.04    0.10   1
   2   3  -4    0.16    0.16  -2
  -2  -3  -5    0.16    0.16   1
   2   3  -4    0.15    0.12  -2
  -2  -3  -5    0.15    0.12   1
   2   3  -4    0.08    0.14  -2
  -2  -3  -5    0.08    0.14   1
  -2  -3   4    0.15    0.18  -2
   2   3   5    0.15    0.18   1
  -2  -3   4   -0.09    0.15  -2
   2   3   5   -0.09    0.15   1
  -2  -3   4   -0.03    0.16  -2
   2   3   5   -0.03    0.16   1
  -2  -3   4   -0.09    0.19  -2
   2   3   5   -0.09    0.19   1
  -2  -3   4    0.14    0.18  -2
   2   3   5    0.14    0.18   1
  -2  -3   4    0.11    0.16  -2
   2   3   5    0.11    0.16   1
  -3  -3  -5    0.76    0.18   1
  -3  -3  -5    1.38    0.19   1
  -3  -3  -5    1.88    0.23   1
  -3  -3  -5    1.80    0.20   1
   3   3   5    1.54    0.22   1
   3   3   5    1.62    0.23   1
   3   3   5    1.54    0.20   1
  -4  -3  -5    0.52    0.19   1
  -4  -3  -5    0.23    0.11   1
   4   3   5    0.74    0.18   1
   4   3   5    0.72    0.17   1
  -5  -3  -5    2.57    0.33   1
   5   3   5    2.65    0.30   1
   5   3   5    2.59    0.33   1
   6   3  -3    1.04    0.29  -2
  -6  -3  -5    1.04    0.29   1
  -6  -3   3    1.25    0.24  -2
   6   3   5    1.25    0.24   1
  -6  -3   3    0.86    0.27  -2
   6   3   5    0.86    0.27   1
  -6  -3   3    1.48    0.31  -2
   6   3   5    1.48    0.31   1
  -7  -3  -5    0.46    0.27   1
   7   3   5    0.25    0.24   1
   7   3   5   -0.30    0.12   1
   7   3   5   -0.18    0.25   1
   6  -4  -5    0.31    0.25   1
  -6   4   5    0.49    0.34   1
  -6   4   5    0.70    0.41   1
  -5   4  -6    0.25    0.24  -2
   5  -4  -5    0.25    0.24   1
   5  -4   6   -0.12    0.31  -2
  -5   4   5   -0.12    0.31   1
   5  -4   6    0.34    0.31  -2
  -5   4   5    0.34    0.31   1
   5  -4   6    0.37    0.30  -2
  -5   4   5    0.37    0.30   1
   4  -4  -5    0.25    0.25   1
  -4   4   5    0.43    0.26   1
  -4   4   5    0.22    0.26   1
  -4   4   5    0.02    0.31   1
   3  -4  -5    0.24    0.21   1
  -3   4   5    0.02    0.24   1
  -3   4   5    0.32    0.25   1
  -2   4  -5    0.32    0.17  -2
   2  -4  -5    0.32    0.17   1
   2  -4   5    0.29    0.24  -2
  -2   4   5    0.29    0.24   1
   2  -4   5    0.34    0.22  -2
  -2   4   5    0.34    0.22   1
   2  -4   5   -0.10    0.21  -2
  -2   4   5   -0.10    0.21   1
   1  -4  -5    0.25    0.17   1
  -1   4   5    0.07    0.20   1
  -1   4   5    0.41    0.20   1
  -1   4   5    0.01    0.20   1
  -1   4   5    0.36    0.22   1
   0  -4  -5    0.55    0.17   1
   0  -4  -5    0.55    0.16   1
   0   4   5    0.21    0.19   1
   0   4   5    0.67    0.21   1
   0   4   5    0.71    0.22   1
  -1  -4  -5    4.79    0.40   1
  -1  -4  -5    3.87    0.40   1
  -1  -4  -5    4.47    0.40   1
   1   4   5    2.96    0.39   1
   1   4   5    4.12    0.44   1
   1   4   5    4.89    0.43   1
   2   4  -4    6.09    0.52  -2
  -2  -4  -5    6.09    0.52   1
   2   4  -4    6.03    0.53  -2
  -2  -4  -5    6.03    0.53   1
   2   4  -4    5.58    0.51  -2
  -2  -4  -5    5.58    0.51   1
   2   4  -4    6.08    0.53  -2
  -2  -4  -5    6.08    0.53   1
   2   4  -4    5.27    0.50  -2
  -2  -4  -5    5.27    0.50   1
  -2  -4   4    6.25    0.55  -2
   2   4   5    6.25    0.55   1
  -2  -4   4    5.81    0.54  -2
   2   4   5    5.81    0.54   1
  -2  -4   4    5.41    0.53  -2
   2   4   5    5.41    0.53   1
  -2  -4   4    6.61    0.53  -2
   2   4   5    6.61    0.53   1
  -3  -4  -5    0.88    0.21   1
  -3  -4  -5    0.66    0.19   1
  -3  -4  -5    0.74    0.19   1
   3   4   5    0.68    0.20   1
   3   4   5    0.84    0.22   1
  -4  -4  -5    0.43    0.19   1
  -4  -4  -5    0.29    0.20   1
   4   4   5    0.42    0.18   1
   5   4  -3   33.25    2.47  -2
  -5  -4  -5   33.25    2.47   1
  -5  -4   3   29.70    2.44  -2
   5   4   5   29.70    2.44   1
  -6  -4  -5    0.02    0.25   1
   6   4   5    0.24    0.31   1
  -7  -4  -5    0.55    0.27   1
   7   4   5    0.01    0.23   1
   7   4   5    0.21    0.31   1
  -6   5  -6    0.33    0.33  -2
   6  -5  -5    0.33    0.33   1
   6  -5   6   -0.15    0.34  -2
  -6   5   5   -0.15    0.34   1
   6  -5   6    0.20    0.39  -2
  -6   5   5    0.20    0.39   1
   5  -5  -5    0.01    0.24   1
  -5   5   5   -0.77    0.31   1
  -5   5   5    0.57    0.31   1
  -5   5   5    0.01    0.29   1
   4  -5  -5    2.01    0.31   1
  -4   5   5    2.07    0.39   1
  -4   5   5    1.80    0.34   1
  -4   5   5    1.78    0.38   1
   3  -5  -5    1.85    0.30   1
  -3   5   5    1.40    0.33   1
  -3   5   5    1.79    0.35   1
  -2   5  -5    0.35    0.21  -2
   2  -5  -5    0.35    0.21   1
   2  -5   5    0.19    0.26  -2
  -2   5   5    0.19    0.26   1
   2  -5   5    0.39    0.25  -2
  -2   5   5    0.39    0.25   1
   1  -5  -5    0.40    0.19   1
  -1   5   5    0.32    0.23   1
  -1   5   5    0.24    0.25   1
  -1   5   5    0.30    0.24   1
   0  -5  -5    0.65    0.18   1
   0   5   5    0.52    0.23   1
   0   5   5    0.49    0.23   1
   1   5  -4    0.45    0.18  -2
  -1  -5  -5    0.45    0.18   1
  -1  -5   4    0.16    0.17  -2
   1   5   5    0.16    0.17   1
  -1  -5   4    0.82    0.21  -2
   1   5   5    0.82    0.21   1
  -1  -5   4    0.51    0.22  -2
   1   5   5    0.51    0.22   1
  -2  -5  -5    0.49    0.14   1
  -2  -5  -5    0.75    0.18   1
  -2  -5  -5    0.54    0.19   1
   2   5   5    0.61    0.24   1
   2   5   5    0.67    0.20   1
  -3  -5  -5    2.02    0.27   1
  -3  -5  -5    1.75    0.26   1
   3   5   5    1.71    0.30   1
   3   5   5    1.17    0.25   1
  -4  -5  -5    1.97    0.30   1
  -4  -5  -5    2.02    0.30   1
   4   5   5    1.99    0.33   1
   4   5   5    1.81    0.27   1
   5   5  -3    1.20    0.28  -2
  -5  -5  -5    1.20    0.28   1
   5   5  -3    1.08    0.28  -2
  -5  -5  -5    1.08    0.28   1
  -5  -5   3    1.21    0.24  -2
   5   5   5    1.21    0.24   1
  -6  -5  -5    0.03    0.25   1
  -7  -5  -5    0.21    0.28   1
   7   5   5    0.20    0.33   1
   5  -6  -5   -0.10    0.27   1
  -5   6   5    0.03    0.30   1
  -5   6   5    0.45    0.40   1
   4  -6  -5    0.19    0.29   1
  -4   6   5    0.19    0.28   1
  -4   6   5    0.14    0.35   1
  -4   6   5   -0.27    0.33   1
  -3   6  -5    0.25    0.21  -2
   3  -6  -5    0.25    0.21   1
  -3   6  -5    0.39    0.24  -2
   3  -6  -5    0.39    0.24   1
   3  -6   5    0.27    0.31  -2
  -3   6   5    0.27    0.31   1
   3  -6   5    0.02    0.31  -2
  -3   6   5    0.02    0.31   1
  -2   6   5    0.01    0.26   1
  -2   6   5    0.12    0.27   1
   1  -6  -5    0.28    0.19   1
  -1   6   5    0.54    0.28   1
  -1   6   5   -0.14    0.24   1
   0  -6  -5    1.04    0.21   1
   0   6   5    1.28    0.29   1
   0   6   5    1.45    0.30   1
   1   6  -4    2.37    0.30  -2
  -1  -6  -5    2.37    0.30   1
  -1  -6   4    1.99    0.30  -2
   1   6   5    1.99    0.30   1
  -1  -6   4    2.80    0.33  -2
   1   6   5    2.80    0.33   1
  -1  -6   4    2.73    0.36  -2
   1   6   5    2.73    0.36   1
  -2  -6  -5   -0.01    0.19   1
  -2  -6  -5    0.40    0.21   1
   2   6   5    0.45    0.24   1
   2   6   5    0.30    0.22   1
  -3  -6  -5    0.42    0.20   1
  -3  -6  -5    0.28    0.22   1
   3   6   5    0.30    0.29   1
   3   6   5    0.14    0.21   1
   4   6  -3   21.52    1.64  -2
  -4  -6  -5   21.52    1.64   1
   4   6  -3   19.27    1.64  -2
  -4  -6  -5   19.27    1.64   1
  -4  -6   3   20.15    1.62  -2
   4   6   5   20.15    1.62   1
  -4  -6   3   20.76    1.67  -2
   4   6   5   20.76    1.67   1
  -5  -6  -5   -0.04    0.24   1
  -5  -6  -5    0.19    0.23   1
  -6  -6  -5    0.38    0.26   1
   4  -7  -5    0.73    0.29   1
  -4   7   5   -0.23    0.37   1
  -4   7   5    0.16    0.32   1
  -4   7   5    0.61    0.40   1
  -3   7  -5    0.50    0.26  -2
   3  -7  -5    0.50    0.26   1
   3  -7   5   -0.36    0.34  -2
  -3   7   5   -0.36    0.34   1
   3  -7   5   -0.05    0.32  -2
  -3   7   5   -0.05    0.32   1
   2  -7  -5    0.41    0.20   1
   2  -7  -5    0.23    0.25   1
  -2   7   5    0.28    0.32   1
  -2   7   5    0.45    0.30   1
   1  -7  -5    0.28    0.18   1
  -1   7   5    0.34    0.32   1
  -1   7   5    0.25    0.28   1
   0   7  -4    0.39    0.21  -2
   0  -7  -5    0.39    0.21   1
   0  -7   4    0.43    0.27  -2
   0   7   5    0.43    0.27   1
   0  -7   4    0.60    0.31  -2
   0   7   5    0.60    0.31   1
  -1  -7  -5    0.22    0.21   1
   1   7   5    0.62    0.29   1
   1   7   5    0.20    0.27   1
  -2  -7  -5    1.36    0.27   1
   2   7   5    0.69    0.26   1
   2   7   5    1.42    0.36   1
  -3  -7  -5    0.98    0.27   1
  -3  -7  -5    0.76    0.26   1
   3   7   5    0.13    0.33   1
   3   7   5    0.45    0.24   1
   4   7  -3    0.30    0.26  -2
  -4  -7  -5    0.30    0.26   1
   4   7  -3    0.08    0.22  -2
  -4  -7  -5    0.08    0.22   1
  -4  -7   3    0.63    0.23  -2
   4   7   5    0.63    0.23   1
  -4  -7   3   -0.14    0.34  -2
   4   7   5   -0.14    0.34   1
  -5  -7  -5    0.67    0.27   1
  -5  -7  -5    0.82    0.27   1
  -5  -7  -5    0.72    0.31   1
  -6  -7  -5    0.13    0.31   1
   3  -8  -5    0.31    0.30   1
  -3   8   5    0.45    0.40   1
  -3   8   5    0.02    0.37   1
  -3   8   5   -0.32    0.33   1
   2  -8  -5    0.25    0.28   1
   2  -8  -5    0.44    0.22   1
  -2   8   5   -0.47    0.31   1
  -2   8   5   -0.09    0.31   1
   1  -8  -5    0.18    0.20   1
   1  -8  -5    0.23    0.28   1
  -1   8   5   -0.37    0.30   1
  -1   8   5    0.29    0.29   1
   0   8  -4    1.00    0.28  -2
   0  -8  -5    1.00    0.28   1
   0   8  -4    0.85    0.25  -2
   0  -8  -5    0.85    0.25   1
   0  -8   4    0.91    0.30  -2
   0   8   5    0.91    0.30   1
   0  -8   4    0.93    0.36  -2
   0   8   5    0.93    0.36   1
  -1  -8  -5    0.09    0.22   1
   1   8   5    0.38    0.34   1
   1   8   5    0.15    0.29   1
  -2  -8  -5    0.00    0.23   1
  -2  -8  -5    0.10    0.22   1
   2   8   5    0.07    0.33   1
   2   8   5    0.34    0.30   1
   3   8  -3    8.29    0.73  -2
  -3  -8  -5    8.29    0.73   1
   3   8  -3    7.44    0.75  -2
  -3  -8  -5    7.44    0.75   1
  -3  -8   3    7.07    0.79  -2
   3   8   5    7.07    0.79   1
  -3  -8   3    7.47    0.73  -2
   3   8   5    7.47    0.73   1
   4   8  -3    0.31    0.29  -2
  -4  -8  -5    0.31    0.29   1
   4   8  -3    0.34    0.27  -2
  -4  -8  -5    0.34    0.27   1
   4   8  -3    0.21    0.26  -2
  -4  -8  -5    0.21    0.26   1
  -4  -8   3   -0.32    0.25  -2
   4   8   5   -0.32    0.25   1
  -5  -8  -5   -0.62    0.28   1
  -5  -8  -5    0.11    0.15   1
  -1   9  -4   -0.01    0.18  -2
   1  -9  -5   -0.01    0.18   1
  -1   9  -4    0.54    0.29  -2
   1  -9  -5    0.54    0.29   1
   1  -9   4    0.14    0.31  -2
  -1   9   5    0.14    0.31   1
   0   9  -4   -0.07    0.25  -2
   0  -9  -5   -0.07    0.25   1
   0   9  -4    0.26    0.28  -2
   0  -9  -5    0.26    0.28   1
   0  -9   4    0.27    0.31  -2
   0   9   5    0.27    0.31   1
   0  -9   4   -0.06    0.35  -2
   0   9   5   -0.06    0.35   1
  -1  -9  -5    0.58    0.27   1
  -1  -9  -5    0.96    0.27   1
   1   9   5    0.61    0.38   1
   1   9   5    0.81    0.32   1
  -2  -9  -5   -0.05    0.25   1
  -2  -9  -5    0.00    0.26   1
  -2  -9  -5    0.29    0.29   1
   3   9  -3   -0.10    0.27  -2
  -3  -9  -5   -0.10    0.27   1
   3   9  -3    0.25    0.27  -2
  -3  -9  -5    0.25    0.27   1
  -3  -9   3   -0.06    0.29  -2
   3   9   5   -0.06    0.29   1
   2   9  -6    0.42    0.36   1
  -2  -9   6    0.31    0.27   1
  -2  -9   6    0.23    0.28   1
   1   9  -6    0.55    0.35   1
  -1  -9   6    1.04    0.31   1
  -1  -9   6    0.05    0.32   1
  -1  -9   6    0.98    0.32   1
   0   9   7    0.31    0.29  -2
   0  -9   6    0.31    0.29   1
   0   9   7    1.35    0.35  -2
   0  -9   6    1.35    0.35   1
  -4  -8  -8   -0.17    0.36  -2
   4   8  -6   -0.17    0.36   1
   4   8   8    0.39    0.31  -2
  -4  -8   6    0.39    0.31   1
   4   8   8    0.16    0.26  -2
  -4  -8   6    0.16    0.26   1
   4   8   8    0.26    0.33  -2
  -4  -8   6    0.26    0.33   1
  -3  -8  -8    0.25    0.34  -2
   3   8  -6    0.25    0.34   1
   3   8   8    1.15    0.29  -2
  -3  -8   6    1.15    0.29   1
   3   8   8    0.46    0.26  -2
  -3  -8   6    0.46    0.26   1
   3   8   8    0.73    0.32  -2
  -3  -8   6    0.73    0.32   1
   2   8  -6    0.34    0.30   1
  -2  -8   6    0.25    0.26   1
  -2  -8   6    0.28    0.26   1
  -2  -8   6    0.22    0.28   1
   1   8  -6    0.22    0.29   1
  -1  -8   6    0.33    0.27   1
  -1  -8   6    0.36    0.23   1
  -1  -8   6    0.43    0.27   1
   0  -8  -7    0.82    0.30  -2
   0   8  -6    0.82    0.30   1
   0   8   7    0.61    0.27  -2
   0  -8   6    0.61    0.27   1
   0   8   7    0.69    0.27  -2
   0  -8   6    0.69    0.27   1
   1  -8   6    1.08    0.31   1
   1  -8   6    0.54    0.28   1
  -2   8  -6   -0.05    0.27   1
   2  -8   6   -0.30    0.27   1
   2  -8   6    0.14    0.33   1
  -3   8  -6   -0.70    0.37   1
   3  -8   6    0.54    0.37   1
   3  -8   6    0.61    0.34   1
   5   7  -6    0.23    0.32   1
  -5  -7   6    0.34    0.30   1
  -5  -7   6    0.02    0.23   1
  -5  -7   6    0.03    0.21   1
  -4  -7  -8   -0.32    0.27  -2
   4   7  -6   -0.32    0.27   1
   4   7   8    0.20    0.24  -2
  -4  -7   6    0.20    0.24   1
   4   7   8   -0.04    0.25  -2
  -4  -7   6   -0.04    0.25   1
   4   7   8    0.03    0.28  -2
  -4  -7   6    0.03    0.28   1
   3   7  -6    0.82    0.33   1
  -3  -7   6    0.72    0.23   1
  -3  -7   6    0.57    0.27   1
  -3  -7   6    0.63    0.25   1
   2   7  -6    0.90    0.31   1
  -2  -7   6    0.97    0.28   1
  -2  -7   6    0.94    0.23   1
  -2  -7   6    0.82    0.28   1
  -2  -7   6    0.56    0.29   1
   1   7  -6    0.99    0.28   1
  -1  -7   6    1.09    0.24   1
  -1  -7   6    0.76    0.26   1
  -1  -7   6    0.77    0.25   1
   0  -7  -7    1.85    0.31  -2
   0   7  -6    1.85    0.31   1
   0   7   7    1.48    0.31  -2
   0  -7   6    1.48    0.31   1
   0   7   7    1.89    0.29  -2
   0  -7   6    1.89    0.29   1
   1  -7   6    1.24    0.30   1
   1  -7   6    0.91    0.29   1
  -2   7  -6    0.18    0.28   1
   2  -7   6    0.05    0.24   1
   2  -7   6    0.46    0.27   1
   3  -7  -6    0.22    0.33  -2
  -3   7  -6    0.22    0.33   1
  -3   7   6    0.88    0.30  -2
   3  -7   6    0.88    0.30   1
  -3   7   6    0.35    0.30  -2
   3  -7   6    0.35    0.30   1
  -4   7  -6    0.08    0.39   1
   4  -7   6    0.19    0.32   1
   4  -7   6    0.22    0.38   1
   6   6  -6    0.21    0.31   1
  -6  -6   6    0.75    0.31   1
  -6  -6   6    0.22    0.24   1
   5   6  -6   -0.05    0.27   1
  -5  -6   6    0.02    0.19   1
  -5  -6   6    0.11    0.28   1
  -4  -6  -8   -0.08    0.26  -2
   4   6  -6   -0.08    0.26   1
   4   6   8    0.19    0.21  -2
  -4  -6   6    0.19    0.21   1
   4   6   8    0.22    0.21  -2
  -4  -6   6    0.22    0.21   1
   4   6   8    0.13    0.26  -2
  -4  -6   6    0.13    0.26   1
   3   6  -6   -0.02    0.24   1
  -3  -6   6   -0.08    0.24   1
  -3  -6   6    0.13    0.21   1
  -3  -6   6    0.16    0.22   1
   2   6  -6    0.99    0.28   1
  -2  -6   6    0.75    0.25   1
  -2  -6   6    0.92    0.20   1
  -2  -6   6    0.11    0.22   1
  -2  -6   6    0.94    0.25   1
  -1  -6  -7    2.51    0.33  -2
   1   6  -6    2.51    0.33   1
   1   6   7    1.56    0.31  -2
  -1  -6   6    1.56    0.31   1
   1   6   7    1.90    0.31  -2
  -1  -6   6    1.90    0.31   1
   1   6   7    2.79    0.31  -2
  -1  -6   6    2.79    0.31   1
   0   6  -6    0.40    0.22   1
   0  -6   6    0.36    0.20   1
   0  -6   6    0.07    0.22   1
   1  -6   6    0.38    0.22   1
   1  -6   6    0.09    0.24   1
  -2   6  -6    0.36    0.24   1
   2  -6   6    0.45    0.25   1
   2  -6   6    0.65    0.25   1
   3  -6  -6   -0.45    0.29  -2
  -3   6  -6   -0.45    0.29   1
  -3   6   6    0.24    0.23  -2
   3  -6   6    0.24    0.23   1
  -3   6   6    0.51    0.27  -2
   3  -6   6    0.51    0.27   1
  -4   6  -6    5.24    0.60   1
   4  -6   6    5.02    0.57   1
   4  -6   6    5.58    0.56   1
   4  -6   6    3.63    0.53   1
  -5   6  -6    0.17    0.37   1
   5  -6   6    0.32    0.36   1
   5  -6   6    0.30    0.31   1
   5  -6   6    0.30    0.32   1
   6   5  -6   -0.14    0.27   1
  -6  -5   6    0.23    0.24   1
  -6  -5   6   -0.18    0.30   1
  -5  -5  -8    0.59    0.29  -2
   5   5  -6    0.59    0.29   1
   5   5   8    0.16    0.24  -2
  -5  -5   6    0.16    0.24   1
   5   5   8    0.05    0.23  -2
  -5  -5   6    0.05    0.23   1
   4   5  -6    1.98    0.33   1
  -4  -5   6    1.72    0.29   1
  -4  -5   6    1.66    0.33   1
  -4  -5   6    1.39    0.25   1
   3   5  -6    0.69    0.26   1
  -3  -5   6    1.00    0.23   1
  -3  -5   6    0.63    0.22   1
  -3  -5   6    0.69    0.25   1
   2   5  -6    1.39    0.25   1
  -2  -5   6    1.08    0.21   1
  -2  -5   6    0.98    0.24   1
  -2  -5   6    0.96    0.24   1
  -1  -5  -7    7.11    0.61  -2
   1   5  -6    7.11    0.61   1
  -1  -5  -7    6.25    0.59  -2
   1   5  -6    6.25    0.59   1
   1   5   7    6.06    0.60  -2
  -1  -5   6    6.06    0.60   1
   1   5   7    6.60    0.59  -2
  -1  -5   6    6.60    0.59   1
   1   5   7    6.89    0.62  -2
  -1  -5   6    6.89    0.62   1
   1   5   7    7.56    0.60  -2
  -1  -5   6    7.56    0.60   1
   0   5  -6    3.27    0.35   1
   0  -5   6    2.78    0.35   1
   0  -5   6    3.50    0.35   1
   1  -5   6   -0.02    0.18   1
   1  -5   6    0.34    0.20   1
   2  -5  -6    4.61    0.49  -2
  -2   5  -6    4.61    0.49   1
  -2   5   6    4.82    0.51  -2
   2  -5   6    4.82    0.51   1
  -2   5   6    4.58    0.49  -2
   2  -5   6    4.58    0.49   1
  -3   5  -6    0.06    0.26   1
   3  -5   6   -0.27    0.20   1
   3  -5   6    0.24    0.22   1
  -4   5  -6    0.08    0.28   1
   4  -5   6    0.28    0.27   1
   4  -5   6   -0.03    0.27   1
   4  -5   6    0.32    0.25   1
  -5   5  -6    0.04    0.34   1
  -5   5  -6   -0.03    0.28   1
   5  -5   6   -0.17    0.30   1
   5  -5   6   -0.06    0.28   1
   5  -5   6    0.19    0.28   1
   6  -5  -5   -0.08    0.21  -2
  -6   5  -6   -0.08    0.21   1
   6  -5  -5   -0.02    0.40  -2
  -6   5  -6   -0.02    0.40   1
  -6   5   5    0.42    0.42  -2
   6  -5   6    0.42    0.42   1
  -6   5   5    0.16    0.38  -2
   6  -5   6    0.16    0.38   1
   7   4  -6    0.59    0.30   1
  -7  -4   6    0.73    0.29   1
   6   4  -6    0.55    0.29   1
  -6  -4   6    0.46    0.24   1
  -6  -4   6    0.72    0.25   1
  -5  -4  -8    0.23    0.24  -2
   5   4  -6    0.23    0.24   1
   5   4   8    0.20    0.26  -2
  -5  -4   6    0.20    0.26   1
   5   4   8    0.26    0.21  -2
  -5  -4   6    0.26    0.21   1
   5   4   8    0.12    0.20  -2
  -5  -4   6    0.12    0.20   1
   4   4  -6    0.36    0.22   1
  -4  -4   6    0.30    0.23   1
  -4  -4   6    0.15    0.17   1
  -4  -4   6    0.25    0.18   1
  -4  -4   6    0.43    0.22   1
   3   4  -6    2.34    0.32   1
  -3  -4   6    2.14    0.31   1
  -3  -4   6    1.96    0.32   1
  -3  -4   6    2.02    0.26   1
  -2  -4  -7    3.12    0.35  -2
   2   4  -6    3.12    0.35   1
   2   4   7    2.84    0.33  -2
  -2  -4   6    2.84    0.33   1
   2   4   7    3.02    0.33  -2
  -2  -4   6    3.02    0.33   1
   2   4   7    2.51    0.34  -2
  -2  -4   6    2.51    0.34   1
   1   4  -6    0.13    0.13   1
   1   4  -6    0.14    0.16   1
   1   4  -6    0.10    0.12   1
  -1  -4   6   -0.07    0.17   1
  -1  -4   6    0.07    0.15   1
  -1  -4   6    0.02    0.17   1
   0   4  -6    1.19    0.19   1
   0   4  -6    1.50    0.21   1
   0  -4   6    1.46    0.22   1
   0  -4   6    1.12    0.22   1
  -1   4  -6    2.70    0.31   1
   1  -4   6    2.98    0.33   1
   1  -4   6    3.52    0.33   1
   1  -4   6    2.98    0.32   1
   2  -4  -6    1.69    0.28  -2
  -2   4  -6    1.69    0.28   1
  -2   4   6    2.21    0.28  -2
   2  -4   6    2.21    0.28   1
  -2   4   6    1.79    0.27  -2
   2  -4   6    1.79    0.27   1
  -3   4  -6    9.07    0.77   1
  -3   4  -6    6.45    0.70   1
   3  -4   6    8.86    0.73   1
   3  -4   6    9.34    0.75   1
   3  -4   6    9.15    0.75   1
  -4   4  -6   -0.12    0.21   1
  -4   4  -6    0.48    0.28   1
   4  -4   6    0.01    0.24   1
   4  -4   6   -0.03    0.24   1
   4  -4   6    0.13    0.23   1
   5  -4  -5    0.25    0.32  -2
  -5   4  -6    0.25    0.32   1
   5  -4  -5   -0.11    0.23  -2
  -5   4  -6   -0.11    0.23   1
  -5   4   5    0.05    0.23  -2
   5  -4   6    0.05    0.23   1
  -5   4   5    0.05    0.27  -2
   5  -4   6    0.05    0.27   1
  -5   4   5    0.11    0.21  -2
   5  -4   6    0.11    0.21   1
  -6   4  -6    1.06    0.38   1
  -6   4  -6    0.41    0.34   1
   6  -4   6    0.74    0.31   1
   6  -4   6    0.05    0.30   1
   7   3  -6   -0.18    0.26   1
   7   3  -6   -0.18    0.27   1
  -7  -3   6   -0.03    0.24   1
  -7  -3   6    0.15    0.26   1
  -6  -3  -8    3.37    0.41  -2
   6   3  -6    3.37    0.41   1
  -6  -3  -8    3.57    0.43  -2
   6   3  -6    3.57    0.43   1
   6   3   8    2.66    0.41  -2
  -6  -3   6    2.66    0.41   1
   6   3   8    3.50    0.40  -2
  -6  -3   6    3.50    0.40   1
   5   3  -6    3.54    0.41   1
   5   3  -6    2.59    0.35   1
  -5  -3   6    3.76    0.37   1
  -5  -3   6    2.77    0.38   1
   4   3  -6    0.26    0.21   1
   4   3  -6    0.22    0.17   1
  -4  -3   6    0.43    0.17   1
  -4  -3   6    0.30    0.21   1
   3   3  -6    0.29    0.12   1
   3   3  -6    0.61    0.20   1
  -3  -3   6    0.38    0.19   1
  -3  -3   6    0.60    0.18   1
  -3  -3   6    0.44    0.15   1
  -2  -3  -7   18.55    1.43  -2
   2   3  -6   18.55    1.43   1
  -2  -3  -7   18.40    1.41  -2
   2   3  -6   18.40    1.41   1
  -2  -3  -7   17.69    1.42  -2
   2   3  -6   17.69    1.42   1
   2   3   7   18.08    1.42  -2
  -2  -3   6   18.08    1.42   1
   2   3   7   17.51    1.42  -2
  -2  -3   6   17.51    1.42   1
   2   3   7   17.68    1.40  -2
  -2  -3   6   17.68    1.40   1
   2   3   7   17.92    1.43  -2
  -2  -3   6   17.92    1.43   1
   1   3  -6    6.82    0.57   1
   1   3  -6    7.19    0.60   1
   1   3  -6    6.89    0.59   1
   1   3  -6    6.47    0.59   1
  -1  -3   6    7.05    0.58   1
  -1  -3   6    6.76    0.60   1
  -1  -3   6    7.26    0.62   1
   0   3  -6    3.24    0.32   1
   0   3  -6    3.11    0.33   1
   0   3  -6    3.24    0.33   1
   0  -3   6    3.14    0.35   1
   0  -3   6    3.07    0.34   1
   0  -3   6    3.24    0.35   1
   1  -3  -6   18.53    1.45  -2
  -1   3  -6   18.53    1.45   1
   1  -3  -6   16.55    1.45  -2
  -1   3  -6   16.55    1.45   1
   1  -3  -6   18.53    1.46  -2
  -1   3  -6   18.53    1.46   1
  -1   3   6   19.17    1.46  -2
   1  -3   6   19.17    1.46   1
  -1   3   6   19.29    1.47  -2
   1  -3   6   19.29    1.47   1
  -1   3   6   19.26    1.46  -2
   1  -3   6   19.26    1.46   1
  -1   3   6   18.77    1.45  -2
   1  -3   6   18.77    1.45   1
  -2   3  -6    2.71    0.31   1
   2  -3   6    2.56    0.29   1
   2  -3   6    2.58    0.29   1
   2  -3   6    2.93    0.31   1
   2  -3   6    2.38    0.29   1
  -3   3  -6    1.40    0.24   1
  -3   3  -6    1.28    0.26   1
  -3   3  -6    1.08    0.19   1
   3  -3   6    1.25    0.22   1
   3  -3   6    1.53    0.21   1
   3  -3   6    1.33    0.24   1
   3  -3   6    1.05    0.22   1
  -4   3  -6    0.54    0.20   1
  -4   3  -6    0.48    0.27   1
  -4   3  -6    0.45    0.18   1
   4  -3   6    0.62    0.20   1
   4  -3   6    0.46    0.20   1
   4  -3   6    0.55    0.25   1
   5  -3  -5    0.18    0.25  -2
  -5   3  -6    0.18    0.25   1
   5  -3  -5    0.49    0.32  -2
  -5   3  -6    0.49    0.32   1
  -5   3   5    0.95    0.28  -2
   5  -3   6    0.95    0.28   1
  -5   3   5    0.48    0.28  -2
   5  -3   6    0.48    0.28   1
  -6   3  -6    0.63    0.34   1
  -6   3  -6    0.40    0.28   1
   6  -3   6    0.33    0.28   1
   6  -3   6    0.20    0.25   1
  -7   3  -6    1.12    0.36   1
  -7   3  -6    0.55    0.38   1
   7  -3   6    0.48    0.34   1
   7  -3   6    0.30    0.36   1
   7   2  -6    1.29    0.30   1
   7   2  -6    1.14    0.31   1
  -7  -2   6    1.44    0.37   1
  -7  -2   6    0.24    0.19   1
  -7  -2   6    1.11    0.29   1
  -6  -2  -8    1.88    0.34  -2
   6   2  -6    1.88    0.34   1
  -6  -2  -8    1.62    0.30  -2
   6   2  -6    1.62    0.30   1
   6   2   8    1.75    0.33  -2
  -6  -2   6    1.75    0.33   1
   6   2   8    1.63    0.31  -2
  -6  -2   6    1.63    0.31   1
   5   2  -6    0.51    0.19   1
   5   2  -6    0.13    0.22   1
  -5  -2   6    0.19    0.24   1
  -5  -2   6    0.76    0.21   1
   4   2  -6    1.95    0.26   1
   4   2  -6    2.23    0.30   1
  -4  -2   6    2.80    0.30   1
  -4  -2   6    2.13    0.29   1
  -3  -2  -7    1.91    0.22  -2
   3   2  -6    1.91    0.22   1
  -3  -2  -7    1.71    0.21  -2
   3   2  -6    1.71    0.21   1
  -3  -2  -7    1.98    0.26  -2
   3   2  -6    1.98    0.26   1
  -3  -2  -7    2.16    0.21  -2
   3   2  -6    2.16    0.21   1
   3   2   7    1.28    0.20  -2
  -3  -2   6    1.28    0.20   1
   3   2   7    1.83    0.25  -2
  -3  -2   6    1.83    0.25   1
   3   2   7    1.54    0.21  -2
  -3  -2   6    1.54    0.21   1
   3   2   7    1.95    0.26  -2
  -3  -2   6    1.95    0.26   1
   2   2  -6    3.08    0.28   1
   2   2  -6    2.89    0.30   1
   2   2  -6    3.09    0.31   1
  -2  -2   6    2.60    0.30   1
  -2  -2   6    2.51    0.31   1
  -2  -2   6    2.45    0.30   1
  -2  -2   6    2.14    0.25   1
  -2  -2   6    2.59    0.28   1
   1   2  -6    1.51    0.21   1
   1   2  -6    1.45    0.19   1
   1   2  -6    1.22    0.18   1
   1   2  -6    1.40    0.17   1
  -1  -2   6    1.27    0.18   1
  -1  -2   6    1.09    0.21   1
  -1  -2   6    1.15    0.15   1
  -1  -2   6    1.23    0.21   1
   0   2  -6    6.08    0.49   1
   0   2  -6    6.12    0.48   1
   0   2  -6    5.24    0.49   1
   0   2  -6    5.53    0.50   1
   0  -2   6    5.98    0.49   1
   0  -2   6    5.62    0.49   1
   0  -2   6    5.19    0.50   1
   0  -2   6    5.77    0.52   1
   1  -2  -6    9.83    0.77  -2
  -1   2  -6    9.83    0.77   1
   1  -2  -6    8.26    0.77  -2
  -1   2  -6    8.26    0.77   1
   1  -2  -6    9.50    0.77  -2
  -1   2  -6    9.50    0.77   1
  -1   2   6   10.01    0.78  -2
   1  -2   6   10.01    0.78   1
  -1   2   6    9.16    0.77  -2
   1  -2   6    9.16    0.77   1
  -1   2   6    9.84    0.78  -2
   1  -2   6    9.84    0.78   1
  -1   2   6    9.69    0.78  -2
   1  -2   6    9.69    0.78   1
  -2   2  -6    5.22    0.48   1
  -2   2  -6    5.52    0.50   1
  -2   2  -6    6.27    0.51   1
  -2   2  -6    5.20    0.48   1
   2  -2   6    5.24    0.50   1
   2  -2   6    5.15    0.50   1
   2  -2   6    5.68    0.51   1
   2  -2   6    5.42    0.50   1
  -3   2  -6    0.60    0.22   1
  -3   2  -6    0.31    0.16   1
  -3   2  -6    0.51    0.18   1
  -3   2  -6    0.63    0.15   1
   3  -2   6    0.50    0.16   1
   3  -2   6    0.46    0.17   1
   3  -2   6    0.59    0.20   1
   3  -2   6    0.82    0.17   1
   4  -2  -5    0.18    0.25  -2
  -4   2  -6    0.18    0.25   1
   4  -2  -5    0.27    0.20  -2
  -4   2  -6    0.27    0.20   1
   4  -2  -5    0.34    0.19  -2
  -4   2  -6    0.34    0.19   1
   4  -2  -5    0.34    0.15  -2
  -4   2  -6    0.34    0.15   1
  -4   2   5    0.46    0.18  -2
   4  -2   6    0.46    0.18   1
  -4   2   5    0.52    0.20  -2
   4  -2   6    0.52    0.20   1
  -5   2  -6    1.22    0.29   1
  -5   2  -6    2.34    0.35   1
   5  -2   6    1.49    0.31   1
   5  -2   6    1.84    0.28   1
  -6   2  -6    0.97    0.28   1
  -6   2  -6    1.13    0.35   1
   6  -2   6    1.37    0.28   1
   6  -2   6    0.47    0.26   1
  -7   2  -6    0.21    0.35   1
  -7   2  -6    0.01    0.30   1
   7  -2   6    0.20    0.29   1
   7  -2   6    0.67    0.28   1
  -7  -1  -8    4.63    0.50  -2
   7   1  -6    4.63    0.50   1
  -7  -1  -8    3.97    0.50  -2
   7   1  -6    3.97    0.50   1
   7   1   8    4.30    0.51  -2
  -7  -1   6    4.30    0.51   1
   7   1   8    4.61    0.49  -2
  -7  -1   6    4.61    0.49   1
   6   1  -6    3.42    0.40   1
   6   1  -6    3.32    0.40   1
  -6  -1   6    2.71    0.38   1
  -6  -1   6    3.42    0.39   1
  -6  -1   6    2.86    0.42   1
   5   1  -6    0.10    0.20   1
   5   1  -6   -0.19    0.22   1
  -5  -1   6    0.43    0.22   1
  -5  -1   6    0.25    0.25   1
  -5  -1   6    0.65    0.23   1
   4   1  -6    0.55    0.16   1
   4   1  -6    0.63    0.20   1
   4   1  -6    0.50    0.17   1
  -4  -1   6    0.24    0.19   1
  -4  -1   6    0.23    0.20   1
  -4  -1   6    0.10    0.17   1
  -3  -1  -7   18.44    1.48  -2
   3   1  -6   18.44    1.48   1
  -3  -1  -7   20.81    1.46  -2
   3   1  -6   20.81    1.46   1
  -3  -1  -7   18.20    1.46  -2
   3   1  -6   18.20    1.46   1
   3   1   7   17.79    1.47  -2
  -3  -1   6   17.79    1.47   1
   3   1   7   19.63    1.48  -2
  -3  -1   6   19.63    1.48   1
   3   1   7   17.51    1.46  -2
  -3  -1   6   17.51    1.46   1
   2   1  -6   10.44    0.72   1
   2   1  -6    9.68    0.73   1
   2   1  -6    8.97    0.73   1
   2   1  -6    9.08    0.71   1
   2   1  -6    8.72    0.71   1
  -2  -1   6    8.80    0.74   1
  -2  -1   6    7.68    0.72   1
  -2  -1   6    8.76    0.72   1
  -2  -1   6    7.20    0.73   1
  -2  -1   6    8.52    0.72   1
   1   1  -6   11.03    0.87   1
   1   1  -6   11.82    0.88   1
   1   1  -6   11.94    0.88   1
  -1  -1   6   10.39    0.88   1
  -1  -1   6    9.94    0.88   1
  -1  -1   6   11.02    0.87   1
   0  -1  -6   39.93    3.15  -2
   0   1  -6   39.93    3.15   1
   0  -1  -6   40.09    3.14  -2
   0   1  -6   40.09    3.14   1
   0  -1  -6   42.15    3.15  -2
   0   1  -6   42.15    3.15   1
   0  -1  -6   45.61    3.15  -2
   0   1  -6   45.61    3.15   1
   0   1   6   40.51    3.15  -2
   0  -1   6   40.51    3.15   1
   0   1   6   40.80    3.15  -2
   0  -1   6   40.80    3.15   1
   0   1   6   40.51    3.15  -2
   0  -1   6   40.51    3.15   1
   0   1   6   39.20    3.15  -2
   0  -1   6   39.20    3.15   1
  -1   1  -6   21.78    1.69   1
  -1   1  -6   20.84    1.69   1
  -1   1  -6   22.77    1.69   1
   1  -1   6   21.64    1.70   1
   1  -1   6   21.83    1.69   1
   1  -1   6   21.72    1.69   1
   1  -1   6   21.95    1.69   1
  -2   1  -6    4.34    0.41   1
  -2   1  -6    4.32    0.41   1
  -2   1  -6    4.54    0.42   1
  -2   1  -6    4.23    0.42   1
  -2   1  -6    4.69    0.44   1
   2  -1   6    4.57    0.43   1
   2  -1   6    4.78    0.43   1
   2  -1   6    4.12    0.40   1
   2  -1   6    4.51    0.43   1
   2  -1   6    4.76    0.44   1
  -3   1  -6    3.51    0.35   1
  -3   1  -6    3.32    0.32   1
  -3   1  -6    3.11    0.33   1
  -3   1  -6    3.40    0.38   1
   3  -1   6    3.17    0.34   1
   3  -1   6    3.32    0.36   1
   3  -1   6    3.25    0.34   1
   3  -1   6    3.31    0.35   1
   4  -1  -5    3.99    0.42  -2
  -4   1  -6    3.99    0.42   1
   4  -1  -5    3.12    0.37  -2
  -4   1  -6    3.12    0.37   1
  -4   1   5    3.36    0.37  -2
   4  -1   6    3.36    0.37   1
  -4   1   5    3.32    0.34  -2
   4  -1   6    3.32    0.34   1
  -5   1  -6    0.18    0.25   1
   5  -1   6   -0.05    0.17   1
   5  -1   6    0.05    0.19   1
  -6   1  -6    0.31    0.31   1
   6  -1   6   -0.08    0.20   1
   6  -1   6   -0.05    0.24   1
   6  -1   6    0.20    0.20   1
   7  -1  -4   -0.13    0.33  -2
  -7   1  -6   -0.13    0.33   1
  -7   1   4    0.47    0.23  -2
   7  -1   6    0.47    0.23   1
  -7   1   4    0.37    0.27  -2
   7  -1   6    0.37    0.27   1
  -7   1   4    0.25    0.23  -2
   7  -1   6    0.25    0.23   1
  -7   0  -8    2.02    0.38  -2
   7   0  -6    2.02    0.38   1
  -7   0  -8    2.32    0.35  -2
   7   0  -6    2.32    0.35   1
   7   0   8    2.00    0.39  -2
  -7   0   6    2.00    0.39   1
   7   0   8    2.69    0.42  -2
  -7   0   6    2.69    0.42   1
   6   0  -6    0.28    0.25   1
   6   0  -6    0.50    0.24   1
  -6   0   6    0.13    0.27   1
  -6   0   6    0.55    0.28   1
   5   0  -6    1.21    0.25   1
   5   0  -6    1.37    0.28   1
  -5   0   6    1.16    0.29   1
  -5   0   6    1.56    0.30   1
  -5   0   6    1.30    0.29   1
  -4   0  -7    0.77    0.20  -2
   4   0  -6    0.77    0.20   1
  -4   0  -7    0.70    0.16  -2
   4   0  -6    0.70    0.16   1
  -4   0  -7    1.00    0.21  -2
   4   0  -6    1.00    0.21   1
   4   0   7    0.69    0.21  -2
  -4   0   6    0.69    0.21   1
   4   0   7    0.67    0.23  -2
  -4   0   6    0.67    0.23   1
   4   0   7    0.68    0.22  -2
  -4   0   6    0.68    0.22   1
   3   0  -6    3.06    0.31   1
   3   0  -6    2.50    0.29   1
   3   0  -6    2.39    0.26   1
   3   0  -6    2.99    0.29   1
  -3   0   6    2.97    0.31   1
  -3   0   6    2.61    0.31   1
  -3   0   6    2.16    0.32   1
  -3   0   6    2.59    0.28   1
  -3   0   6    2.46    0.29   1
   2   0  -6    0.04    0.16   1
   2   0  -6    0.05    0.13   1
   2   0  -6    0.10    0.12   1
  -2   0   6   -0.25    0.15   1
  -2   0   6   -0.10    0.19   1
  -2   0   6   -0.13    0.15   1
  -2   0   6    0.08    0.18   1
  -2   0   6    0.00    0.15   1
  -2   0   6    0.07    0.19   1
   1   0  -6   -0.06    0.14   1
   1   0  -6    0.14    0.12   1
   1   0  -6    0.13    0.10   1
   1   0  -6   -0.04    0.10   1
  -1   0   6    0.10    0.14   1
  -1   0   6    0.21    0.14   1
  -1   0   6    0.29    0.12   1
  -1   0   6    0.10    0.13   1
   0   0  -6   18.38    1.35  -2
   0   0  -6   18.38    1.35   1
   0   0  -6   17.32    1.35  -2
   0   0  -6   17.32    1.35   1
   0   0  -6   18.69    1.36  -2
   0   0  -6   18.69    1.36   1
   0   0  -6   17.50    1.35  -2
   0   0  -6   17.50    1.35   1
   0   0   6   16.87    1.35  -2
   0   0   6   16.87    1.35   1
   0   0   6   17.19    1.35  -2
   0   0   6   17.19    1.35   1
   0   0   6   15.86    1.35  -2
   0   0   6   15.86    1.35   1
   0   0   6   17.80    1.37  -2
   0   0   6   17.80    1.37   1
  -1   0  -6    0.98    0.16   1
  -1   0  -6    0.86    0.15   1
  -1   0  -6    1.33    0.17   1
  -1   0  -6    1.20    0.17   1
  -1   0  -6    0.80    0.14   1
   1   0   6    0.75    0.15   1
   1   0   6    0.79    0.16   1
   1   0   6    0.75    0.17   1
   1   0   6    0.75    0.14   1
  -2   0  -6    0.27    0.16   1
  -2   0  -6    0.15    0.17   1
  -2   0  -6    0.42    0.14   1
  -2   0  -6    0.44    0.13   1
  -2   0  -6    0.19    0.12   1
   2   0   6    0.49    0.16   1
   2   0   6    0.19    0.12   1
   2   0   6    0.34    0.13   1
   2   0   6    0.24    0.17   1
   2   0   6    0.25    0.16   1
   2   0   6    0.39    0.17   1
  -3   0  -6    1.20    0.16   1
  -3   0  -6    1.16    0.21   1
  -3   0  -6    0.86    0.16   1
  -3   0  -6    1.16    0.20   1
   3   0   6    1.42    0.21   1
   3   0   6    0.93    0.18   1
   3   0   6    0.98    0.20   1
   3   0   6    1.00    0.18   1
   3   0   6    0.86    0.20   1
   3   0   6    1.23    0.19   1
   4   0  -5    4.20    0.42  -2
  -4   0  -6    4.20    0.42   1
   4   0  -5    3.88    0.36  -2
  -4   0  -6    3.88    0.36   1
  -4   0   5    3.69    0.40  -2
   4   0   6    3.69    0.40   1
  -4   0   5    3.04    0.36  -2
   4   0   6    3.04    0.36   1
  -4   0   5    4.33    0.41  -2
   4   0   6    4.33    0.41   1
  -4   0   5    4.25    0.37  -2
   4   0   6    4.25    0.37   1
  -5   0  -6    0.74    0.25   1
   5   0   6    0.59    0.22   1
   5   0   6    0.53    0.17   1
   5   0   6    0.81    0.22   1
  -6   0  -6    2.27    0.35   1
   6   0   6    2.18    0.31   1
   6   0   6    1.63    0.26   1
   6   0   6    1.51    0.30   1
  -7   0   4    1.05    0.27  -2
   7   0   6    1.05    0.27   1
  -7   0   4    0.64    0.25  -2
   7   0   6    0.64    0.25   1
  -7   1  -8    1.27    0.29  -2
   7  -1  -6    1.27    0.29   1
  -7   1  -8    1.28    0.34  -2
   7  -1  -6    1.28    0.34   1
   7  -1   8    1.83    0.40  -2
  -7   1   6    1.83    0.40   1
   7  -1   8    1.22    0.36  -2
  -7   1   6    1.22    0.36   1
   6  -1  -6    0.03    0.25   1
   6  -1  -6    0.17    0.18   1
   6  -1  -6   -0.04    0.20   1
  -6   1   6    0.58    0.30   1
  -6   1   6    0.20    0.29   1
   5  -1  -6    0.09    0.25   1
  -5   1   6    0.30    0.27   1
  -5   1   6    0.34    0.26   1
  -4   1  -7    5.85    0.54  -2
   4  -1  -6    5.85    0.54   1
  -4   1  -7    5.93    0.54  -2
   4  -1  -6    5.93    0.54   1
  -4   1  -7    6.60    0.60  -2
   4  -1  -6    6.60    0.60   1
   4  -1   7    6.90    0.60  -2
  -4   1   6    6.90    0.60   1
   4  -1   7    6.03    0.58  -2
  -4   1   6    6.03    0.58   1
   4  -1   7    5.87    0.59  -2
  -4   1   6    5.87    0.59   1
   3  -1  -6    6.24    0.47   1
   3  -1  -6    5.32    0.46   1
   3  -1  -6    6.30    0.51   1
   3  -1  -6    4.68    0.46   1
   3  -1  -6    5.45    0.47   1
  -3   1   6    5.60    0.51   1
  -3   1   6    4.70    0.50   1
  -3   1   6    4.08    0.49   1
  -3   1   6    4.28    0.48   1
  -3   1   6    6.12    0.51   1
   2  -1  -6    7.32    0.61   1
   2  -1  -6    8.14    0.61   1
   2  -1  -6    6.90    0.61   1
   2  -1  -6    8.12    0.63   1
  -2   1   6    5.82    0.63   1
  -2   1   6    7.21    0.64   1
  -2   1   6    7.61    0.64   1
  -2   1   6    7.21    0.62   1
   1  -1  -6   21.38    1.66   1
   1  -1  -6   23.34    1.66   1
   1  -1  -6   21.09    1.66   1
   1  -1  -6   22.77    1.67   1
  -1   1   6   18.16    1.67   1
  -1   1   6   21.62    1.66   1
  -1   1   6   22.55    1.67   1
  -1   1   6   20.84    1.67   1
   0   1  -6   40.50    2.89  -2
   0  -1  -6   40.50    2.89   1
   0   1  -6   35.78    2.88  -2
   0  -1  -6   35.78    2.88   1
   0   1  -6   37.31    2.88  -2
   0  -1  -6   37.31    2.88   1
   0   1  -6   40.68    2.89  -2
   0  -1  -6   40.68    2.89   1
   0  -1   6   37.33    2.88  -2
   0   1   6   37.33    2.88   1
   0  -1   6   34.29    2.89  -2
   0   1   6   34.29    2.89   1
   0  -1   6   37.30    2.88  -2
   0   1   6   37.30    2.88   1
  -1  -1  -6    5.48    0.46   1
  -1  -1  -6    6.26    0.47   1
  -1  -1  -6    5.60    0.47   1
  -1  -1  -6    5.70    0.48   1
  -1  -1  -6    6.12    0.47   1
   1   1   6    4.06    0.47   1
   1   1   6    5.59    0.46   1
   1   1   6    5.43    0.47   1
   1   1   6    4.51    0.48   1
  -2  -1  -6   13.99    1.07   1
  -2  -1  -6   13.87    1.07   1
  -2  -1  -6   13.94    1.08   1
  -2  -1  -6   13.18    1.07   1
  -2  -1  -6   14.58    1.08   1
  -2  -1  -6   14.00    1.07   1
   2   1   6   12.98    1.09   1
   2   1   6   14.16    1.07   1
   2   1   6   13.67    1.06   1
   2   1   6   13.54    1.08   1
   2   1   6   11.45    1.08   1
   2   1   6   13.84    1.08   1
   3   1  -5   13.99    1.14  -2
  -3  -1  -6   13.99    1.14   1
   3   1  -5   15.36    1.15  -2
  -3  -1  -6   15.36    1.15   1
   3   1  -5   15.81    1.16  -2
  -3  -1  -6   15.81    1.16   1
   3   1  -5   14.61    1.13  -2
  -3  -1  -6   14.61    1.13   1
  -3  -1   5   13.74    1.14  -2
   3   1   6   13.74    1.14   1
  -3  -1   5   15.04    1.16  -2
   3   1   6   15.04    1.16   1
  -3  -1   5   14.89    1.15  -2
   3   1   6   14.89    1.15   1
  -3  -1   5   14.39    1.14  -2
   3   1   6   14.39    1.14   1
  -3  -1   5   14.20    1.16  -2
   3   1   6   14.20    1.16   1
  -3  -1   5   13.98    1.17  -2
   3   1   6   13.98    1.17   1
  -3  -1   5   12.46    1.16  -2
   3   1   6   12.46    1.16   1
  -3  -1   5   15.31    1.15  -2
   3   1   6   15.31    1.15   1
  -4  -1  -6   -0.04    0.10   1
  -4  -1  -6    0.20    0.14   1
   4   1   6    0.48    0.16   1
   4   1   6    0.19    0.16   1
   4   1   6    0.36    0.14   1
   4   1   6    0.02    0.14   1
   4   1   6    0.33    0.16   1
  -5  -1  -6    1.19    0.23   1
   5   1   6    1.83    0.25   1
   5   1   6    1.78    0.25   1
  -6  -1  -6    0.15    0.22   1
   6   1   6   -0.03    0.22   1
   6   1   6    0.05    0.17   1
   7   1  -4    0.25    0.27  -2
  -7  -1  -6    0.25    0.27   1
  -7  -1   4    0.27    0.24  -2
   7   1   6    0.27    0.24   1
  -7  -1   4    0.37    0.20  -2
   7   1   6    0.37    0.20   1
   7  -2  -6    0.51    0.19   1
   7  -2  -6    0.00    0.13   1
  -7   2   6    0.41    0.38   1
  -7   2   6   -0.17    0.34   1
   6  -2  -6    0.47    0.28   1
   6  -2  -6    0.28    0.20   1
  -6   2   6    0.51    0.33   1
  -6   2   6    0.93    0.30   1
   5  -2  -6    0.53    0.27   1
  -5   2   6   -0.02    0.29   1
  -5   2   6    0.71    0.30   1
  -4   2  -7    0.56    0.15  -2
   4  -2  -6    0.56    0.15   1
  -4   2  -7    0.38    0.16  -2
   4  -2  -6    0.38    0.16   1
  -4   2  -7    0.46    0.22  -2
   4  -2  -6    0.46    0.22   1
   4  -2   7    0.45    0.23  -2
  -4   2   6    0.45    0.23   1
   4  -2   7    0.54    0.26  -2
  -4   2   6    0.54    0.26   1
   4  -2   7    0.33    0.25  -2
  -4   2   6    0.33    0.25   1
   3  -2  -6    0.61    0.18   1
   3  -2  -6    0.51    0.17   1
   3  -2  -6    0.47    0.15   1
  -3   2   6    0.48    0.22   1
  -3   2   6    0.39    0.21   1
  -3   2   6   -0.10    0.21   1
  -3   2   6    0.11    0.22   1
   2  -2  -6    8.84    0.67   1
   2  -2  -6    7.66    0.66   1
   2  -2  -6    7.34    0.65   1
   2  -2  -6    8.37    0.67   1
  -2   2   6    8.09    0.69   1
  -2   2   6    7.77    0.69   1
  -2   2   6    8.18    0.68   1
  -2   2   6    6.42    0.68   1
  -1   2  -6   10.86    0.86  -2
   1  -2  -6   10.86    0.86   1
  -1   2  -6   10.37    0.85  -2
   1  -2  -6   10.37    0.85   1
  -1   2  -6   10.87    0.85  -2
   1  -2  -6   10.87    0.85   1
  -1   2  -6   10.01    0.85  -2
   1  -2  -6   10.01    0.85   1
   1  -2   6   10.87    0.87  -2
  -1   2   6   10.87    0.87   1
   1  -2   6   10.22    0.87  -2
  -1   2   6   10.22    0.87   1
   0  -2  -6    8.57    0.63   1
   0  -2  -6    8.30    0.65   1
   0  -2  -6    7.59    0.64   1
   0  -2  -6    7.88    0.64   1
   0  -2  -6    8.56    0.64   1
   0   2   6    6.33    0.66   1
   0   2   6    5.83    0.66   1
   0   2   6    7.52    0.65   1
   0   2   6    8.24    0.65   1
  -1  -2  -6   -0.01    0.13   1
  -1  -2  -6   -0.11    0.14   1
  -1  -2  -6    0.10    0.12   1
  -1  -2  -6    0.03    0.12   1
  -1  -2  -6   -0.09    0.14   1
   1   2   6    0.22    0.17   1
   1   2   6    0.15    0.15   1
   1   2   6    0.33    0.16   1
   1   2   6    0.10    0.18   1
   1   2   6    0.03    0.14   1
  -2  -2  -6    0.43    0.15   1
   2   2   6    0.05    0.17   1
   2   2   6    0.25    0.21   1
   3   2  -5    8.38    0.69  -2
  -3  -2  -6    8.38    0.69   1
   3   2  -5    8.70    0.71  -2
  -3  -2  -6    8.70    0.71   1
   3   2  -5    8.87    0.72  -2
  -3  -2  -6    8.87    0.72   1
   3   2  -5    8.55    0.70  -2
  -3  -2  -6    8.55    0.70   1
  -3  -2   5    8.54    0.74  -2
   3   2   6    8.54    0.74   1
  -3  -2   5    9.61    0.72  -2
   3   2   6    9.61    0.72   1
  -3  -2   5    8.52    0.70  -2
   3   2   6    8.52    0.70   1
  -3  -2   5    8.65    0.72  -2
   3   2   6    8.65    0.72   1
  -3  -2   5    8.24    0.73  -2
   3   2   6    8.24    0.73   1
  -4  -2  -6   -0.02    0.16   1
   4   2   6    0.05    0.20   1
   4   2   6    0.16    0.17   1
   4   2   6    0.09    0.16   1
  -5  -2  -6    3.97    0.42   1
   5   2   6    4.42    0.44   1
   5   2   6    3.75    0.42   1
   6   2  -4    1.28    0.28  -2
  -6  -2  -6    1.28    0.28   1
  -6  -2   4    1.62    0.28  -2
   6   2   6    1.62    0.28   1
  -6  -2   4    1.79    0.29  -2
   6   2   6    1.79    0.29   1
  -6  -2   4    2.29    0.31  -2
   6   2   6    2.29    0.31   1
  -7  -2  -6    1.17    0.29   1
   7   2   6    1.29    0.28   1
   7   2   6    0.98    0.27   1
   7   2   6    1.18    0.27   1
   6  -3  -6    0.48    0.25   1
  -6   3   6    0.18    0.32   1
  -6   3   6    0.51    0.37   1
  -5   3  -7    1.16    0.33  -2
   5  -3  -6    1.16    0.33   1
   5  -3   7    1.22    0.33  -2
  -5   3   6    1.22    0.33   1
   5  -3   7    1.27    0.36  -2
  -5   3   6    1.27    0.36   1
   4  -3  -6    1.93    0.34   1
  -4   3   6    1.73    0.29   1
  -4   3   6    1.83    0.34   1
  -4   3   6    1.30    0.31   1
   3  -3  -6    0.82    0.24   1
  -3   3   6    1.30    0.27   1
  -3   3   6    1.30    0.27   1
   2  -3  -6    3.20    0.34   1
  -2   3   6    3.27    0.37   1
  -2   3   6    3.03    0.36   1
  -2   3   6    3.39    0.36   1
  -2   3   6    2.43    0.36   1
  -1   3  -6   17.06    1.34  -2
   1  -3  -6   17.06    1.34   1
  -1   3  -6   16.90    1.35  -2
   1  -3  -6   16.90    1.35   1
  -1   3  -6   17.85    1.35  -2
   1  -3  -6   17.85    1.35   1
  -1   3  -6   18.28    1.36  -2
   1  -3  -6   18.28    1.36   1
   1  -3   6   17.49    1.37  -2
  -1   3   6   17.49    1.37   1
   1  -3   6   14.25    1.36  -2
  -1   3   6   14.25    1.36   1
   1  -3   6   18.02    1.36  -2
  -1   3   6   18.02    1.36   1
   0  -3  -6    2.30    0.26   1
   0  -3  -6    1.89    0.23   1
   0  -3  -6    1.61    0.23   1
   0  -3  -6    1.48    0.22   1
   0  -3  -6    1.97    0.23   1
   0   3   6    1.83    0.27   1
   0   3   6    2.05    0.21   1
   0   3   6    1.45    0.27   1
   0   3   6    1.82    0.28   1
  -1  -3  -6   17.92    1.39   1
  -1  -3  -6   18.15    1.40   1
  -1  -3  -6   19.30    1.41   1
  -1  -3  -6   16.87    1.40   1
  -1  -3  -6   18.69    1.40   1
   1   3   6   17.26    1.40   1
   1   3   6   18.71    1.41   1
   1   3   6   15.48    1.42   1
   2   3  -5   23.67    1.91  -2
  -2  -3  -6   23.67    1.91   1
   2   3  -5   26.85    1.90  -2
  -2  -3  -6   26.85    1.90   1
   2   3  -5   25.06    1.90  -2
  -2  -3  -6   25.06    1.90   1
   2   3  -5   24.66    1.89  -2
  -2  -3  -6   24.66    1.89   1
   2   3  -5   25.14    1.89  -2
  -2  -3  -6   25.14    1.89   1
  -2  -3   5   23.63    1.91  -2
   2   3   6   23.63    1.91   1
  -2  -3   5   26.59    1.91  -2
   2   3   6   26.59    1.91   1
  -2  -3   5   20.18    1.92  -2
   2   3   6   20.18    1.92   1
  -2  -3   5   24.67    1.91  -2
   2   3   6   24.67    1.91   1
  -2  -3   5   24.15    1.90  -2
   2   3   6   24.15    1.90   1
  -2  -3   5   24.57    1.90  -2
   2   3   6   24.57    1.90   1
  -3  -3  -6    0.63    0.15   1
  -3  -3  -6    0.31    0.13   1
  -3  -3  -6    0.93    0.18   1
   3   3   6    0.42    0.17   1
   3   3   6    0.75    0.19   1
  -4  -3  -6    6.43    0.57   1
   4   3   6    5.96    0.55   1
   4   3   6    6.31    0.56   1
  -5  -3  -6   -0.16    0.19   1
   5   3   6    0.29    0.21   1
   5   3   6   -0.09    0.17   1
   6   3  -4    1.00    0.26  -2
  -6  -3  -6    1.00    0.26   1
  -6  -3   4    0.80    0.23  -2
   6   3   6    0.80    0.23   1
  -6  -3   4    0.72    0.26  -2
   6   3   6    0.72    0.26   1
  -7  -3  -6   -0.06    0.25   1
   7   3   6   -0.19    0.23   1
   7   3   6   -0.07    0.25   1
   7   3   6    0.13    0.27   1
   6  -4  -6    0.07    0.29   1
  -6   4   6    0.59    0.37   1
  -6   4   6    0.39    0.33   1
  -5   4  -7   -0.03    0.22  -2
   5  -4  -6   -0.03    0.22   1
  -5   4  -7    0.45    0.29  -2
   5  -4  -6    0.45    0.29   1
   5  -4   7   -0.34    0.29  -2
  -5   4   6   -0.34    0.29   1
   5  -4   7    0.38    0.35  -2
  -5   4   6    0.38    0.35   1
   5  -4   7    0.30    0.27  -2
  -5   4   6    0.30    0.27   1
   4  -4  -6    0.38    0.27   1
  -4   4   6    0.38    0.28   1
  -4   4   6    0.22    0.26   1
  -4   4   6    0.50    0.29   1
   3  -4  -6    9.57    0.92   1
  -3   4   6   12.12    0.96   1
  -3   4   6   11.84    0.96   1
  -2   4  -6    2.41    0.31  -2
   2  -4  -6    2.41    0.31   1
   2  -4   6    2.81    0.35  -2
  -2   4   6    2.81    0.35   1
   2  -4   6    2.62    0.35  -2
  -2   4   6    2.62    0.35   1
   2  -4   6    2.37    0.34  -2
  -2   4   6    2.37    0.34   1
   1  -4  -6    3.69    0.40   1
  -1   4   6    4.07    0.43   1
  -1   4   6    4.06    0.41   1
   0  -4  -6    0.23    0.16   1
   0   4   6    0.29    0.20   1
   0   4   6    0.19    0.21   1
   1   4   6    0.38    0.18   1
   2   4  -5    8.02    0.67  -2
  -2  -4  -6    8.02    0.67   1
   2   4  -5    8.41    0.67  -2
  -2  -4  -6    8.41    0.67   1
   2   4  -5    8.08    0.69  -2
  -2  -4  -6    8.08    0.69   1
  -2  -4   5    8.83    0.68  -2
   2   4   6    8.83    0.68   1
  -2  -4   5    6.94    0.72  -2
   2   4   6    6.94    0.72   1
  -2  -4   5    8.31    0.71  -2
   2   4   6    8.31    0.71   1
  -3  -4  -6    0.06    0.16   1
  -3  -4  -6   -0.05    0.15   1
   3   4   6    0.01    0.18   1
   3   4   6    0.13    0.19   1
  -4  -4  -6    3.64    0.42   1
   4   4   6    3.87    0.40   1
   5   4  -4    2.10    0.31  -2
  -5  -4  -6    2.10    0.31   1
  -5  -4   4    1.48    0.26  -2
   5   4   6    1.48    0.26   1
  -6  -4  -6    1.36    0.28   1
   6   4   6    1.05    0.24   1
  -7  -4  -6    0.60    0.28   1
   7   4   6    0.26    0.31   1
   5  -5  -6    0.28    0.27   1
  -5   5   6   -0.33    0.34   1
  -5   5   6    0.28    0.37   1
  -5   5   6    0.00    0.29   1
   4  -5  -6    0.55    0.26   1
  -4   5   6    0.29    0.30   1
  -4   5   6   -0.31    0.25   1
  -4   5   6    0.04    0.33   1
   3  -5  -6    0.23    0.23   1
  -3   5   6    0.04    0.29   1
  -3   5   6    0.11    0.28   1
  -2   5  -6    4.63    0.50  -2
   2  -5  -6    4.63    0.50   1
   2  -5   6    5.17    0.56  -2
  -2   5   6    5.17    0.56   1
   2  -5   6    5.44    0.55  -2
  -2   5   6    5.44    0.55   1
   1  -5  -6    0.21    0.18   1
  -1   5   6    0.01    0.23   1
  -1   5   6    0.15    0.26   1
  -1   5   6    0.20    0.25   1
   0  -5  -6    6.63    0.60   1
   0   5   6    6.39    0.65   1
   0   5   6    7.58    0.64   1
   1   5  -5   11.91    0.98  -2
  -1  -5  -6   11.91    0.98   1
  -1  -5   5   13.99    1.01  -2
   1   5   6   13.99    1.01   1
  -1  -5   5   11.53    0.97  -2
   1   5   6   11.53    0.97   1
  -1  -5   5   10.82    1.01  -2
   1   5   6   10.82    1.01   1
  -2  -5  -6    1.59    0.23   1
  -2  -5  -6    0.92    0.17   1
  -2  -5  -6    1.11    0.18   1
   2   5   6    1.05    0.23   1
   2   5   6    0.37    0.18   1
   2   5   6    1.52    0.28   1
  -3  -5  -6    5.70    0.52   1
  -3  -5  -6    5.55    0.53   1
   3   5   6    5.27    0.58   1
   3   5   6    5.31    0.53   1
  -4  -5  -6    0.38    0.22   1
  -4  -5  -6    0.39    0.21   1
   4   5   6    0.33    0.25   1
   4   5   6    0.23    0.22   1
   5   5  -4    0.12    0.20  -2
  -5  -5  -6    0.12    0.20   1
  -5  -5   4    0.21    0.19  -2
   5   5   6    0.21    0.19   1
  -6  -5  -6   -0.05    0.24   1
   6   5   6    0.13    0.21   1
  -7  -5  -6    0.28    0.31   1
   7   5   6    0.67    0.38   1
   5  -6  -6    0.82    0.32   1
  -5   6   6    0.25    0.32   1
  -5   6   6   -0.21    0.35   1
  -5   6   6    0.15    0.40   1
   4  -6  -6    5.54    0.58   1
  -4   6   6    5.19    0.57   1
  -4   6   6    5.67    0.63   1
  -4   6   6    5.45    0.63   1
  -3   6  -6    0.40    0.25  -2
   3  -6  -6    0.40    0.25   1
   3  -6   6    0.11    0.29  -2
  -3   6   6    0.11    0.29   1
   3  -6   6    0.00    0.30  -2
  -3   6   6    0.00    0.30   1
   2  -6  -6    0.53    0.25   1
  -2   6   6    0.24    0.28   1
  -2   6   6    0.37    0.30   1
  -1   6   6    0.05    0.28   1
  -1   6   6    0.28    0.26   1
  -1   6   6    0.29    0.27   1
   0  -6  -6    0.99    0.22   1
   0   6   6    1.08    0.28   1
   0   6   6    0.80    0.30   1
   1   6  -5    4.03    0.43  -2
  -1  -6  -6    4.03    0.43   1
  -1  -6   5    4.04    0.48  -2
   1   6   6    4.04    0.48   1
  -1  -6   5    4.52    0.45  -2
   1   6   6    4.52    0.45   1
  -1  -6   5    3.19    0.40  -2
   1   6   6    3.19    0.40   1
  -2  -6  -6    0.30    0.19   1
   2   6   6    0.15    0.24   1
   2   6   6    0.30    0.28   1
  -3  -6  -6    1.21    0.25   1
  -3  -6  -6    1.51    0.26   1
   3   6   6    1.17    0.28   1
   3   6   6    1.12    0.32   1
   4   6  -4    1.06    0.25  -2
  -4  -6  -6    1.06    0.25   1
   4   6  -4    1.02    0.25  -2
  -4  -6  -6    1.02    0.25   1
  -4  -6   4    0.64    0.25  -2
   4   6   6    0.64    0.25   1
  -4  -6   4    1.10    0.36  -2
   4   6   6    1.10    0.36   1
  -5  -6  -6    0.50    0.24   1
   5   6   6    0.38    0.23   1
  -6  -6  -6    0.08    0.26   1
   4  -7  -6    0.33    0.28   1
  -4   7   6    0.14    0.32   1
  -4   7   6   -0.58    0.36   1
  -4   7   6    0.32    0.38   1
  -3   7  -6    1.19    0.29  -2
   3  -7  -6    1.19    0.29   1
   3  -7   6    0.12    0.39  -2
  -3   7   6    0.12    0.39   1
   3  -7   6    1.00    0.37  -2
  -3   7   6    1.00    0.37   1
   2  -7  -6   -0.17    0.19   1
  -2   7   6    0.74    0.31   1
  -2   7   6    0.40    0.34   1
   1  -7  -6    1.25    0.27   1
  -1   7   6    2.36    0.37   1
  -1   7   6    1.80    0.37   1
   0   7  -5    2.74    0.36  -2
   0  -7  -6    2.74    0.36   1
   0  -7   5    2.72    0.40  -2
   0   7   6    2.72    0.40   1
   0  -7   5    4.05    0.46  -2
   0   7   6    4.05    0.46   1
   0  -7   5    3.56    0.46  -2
   0   7   6    3.56    0.46   1
  -1  -7  -6    0.42    0.22   1
   1   7   6    0.31    0.30   1
   1   7   6    0.47    0.29   1
  -2  -7  -6    0.96    0.25   1
   2   7   6    1.44    0.37   1
   2   7   6    1.29    0.28   1
  -3  -7  -6    0.84    0.26   1
  -3  -7  -6    1.60    0.29   1
   3   7   6    1.24    0.28   1
   3   7   6    0.74    0.37   1
   4   7  -4    0.23    0.25  -2
  -4  -7  -6    0.23    0.25   1
   4   7  -4   -0.22    0.21  -2
  -4  -7  -6   -0.22    0.21   1
  -4  -7   4   -0.01    0.23  -2
   4   7   6   -0.01    0.23   1
  -4  -7   4   -0.49    0.33  -2
   4   7   6   -0.49    0.33   1
  -5  -7  -6    0.28    0.24   1
  -5  -7  -6    0.42    0.26   1
   5   7   6    0.13    0.24   1
   3  -8  -6   -0.01    0.32   1
  -3   8   6    0.67    0.39   1
  -3   8   6    0.44    0.41   1
   2  -8  -6    0.24    0.31   1
   2  -8  -6    0.17    0.20   1
  -2   8   6   -0.23    0.34   1
  -2   8   6    0.01    0.32   1
   1  -8  -6    0.83    0.25   1
  -1   8   6   -0.01    0.33   1
  -1   8   6    0.45    0.31   1
   0   8  -5    0.94    0.27  -2
   0  -8  -6    0.94    0.27   1
   0  -8   5    1.17    0.40  -2
   0   8   6    1.17    0.40   1
   0  -8   5    1.23    0.32  -2
   0   8   6    1.23    0.32   1
  -1  -8  -6    0.37    0.23   1
   1   8   6    0.51    0.33   1
   1   8   6    0.13    0.33   1
  -2  -8  -6   -0.11    0.20   1
   2   8   6   -0.03    0.35   1
   2   8   6    0.20    0.28   1
   3   8  -4    0.68    0.26  -2
  -3  -8  -6    0.68    0.26   1
   3   8  -4    0.34    0.25  -2
  -3  -8  -6    0.34    0.25   1
  -3  -8   4    0.18    0.27  -2
   3   8   6    0.18    0.27   1
  -3  -8   4    0.36    0.38  -2
   3   8   6    0.36    0.38   1
   4   8  -4    0.23    0.24  -2
  -4  -8  -6    0.23    0.24   1
   4   8  -4    0.07    0.27  -2
  -4  -8  -6    0.07    0.27   1
  -4  -8   4    0.51    0.27  -2
   4   8   6    0.51    0.27   1
  -1   9  -5    0.56    0.37  -2
   1  -9  -6    0.56    0.37   1
   1  -9   5    0.67    0.34  -2
  -1   9   6    0.67    0.34   1
   1  -9   5   -0.22    0.38  -2
  -1   9   6   -0.22    0.38   1
   0   9  -5    0.52    0.26  -2
   0  -9  -6    0.52    0.26   1
   0   9  -5    0.24    0.31  -2
   0  -9  -6    0.24    0.31   1
   0  -9   5    0.50    0.36  -2
   0   9   6    0.50    0.36   1
   0  -9   5    0.19    0.34  -2
   0   9   6    0.19    0.34   1
  -1  -9  -6    0.26    0.27   1
  -1  -9  -6    0.23    0.30   1
   1   9   6    0.16    0.39   1
   1   9   6    0.05    0.34   1
  -2  -9  -6    0.68    0.30   1
  -2  -9  -6    0.64    0.26   1
   2   9   6    0.96    0.43   1
   2   9   6    0.88    0.37   1
  -3  -9   4    0.42    0.35  -2
   3   9   6    0.42    0.35   1
   1   9  -7    0.94    0.32   1
  -1  -9   7    0.46    0.31   1
  -1  -9   7   -0.41    0.32   1
  -1  -9   7    0.15    0.27   1
  -4  -8  -9   -0.08    0.35  -2
   4   8  -7   -0.08    0.35   1
   4   8   9    0.15    0.26  -2
  -4  -8   7    0.15    0.26   1
   4   8   9    0.21    0.31  -2
  -4  -8   7    0.21    0.31   1
  -3  -8  -9    0.64    0.32  -2
   3   8  -7    0.64    0.32   1
   3   8   9    0.62    0.30  -2
  -3  -8   7    0.62    0.30   1
   3   8   9    0.63    0.30  -2
  -3  -8   7    0.63    0.30   1
   3   8   9    0.99    0.31  -2
  -3  -8   7    0.99    0.31   1
   2   8  -7    0.47    0.29   1
  -2  -8   7    0.52    0.30   1
  -2  -8   7    0.12    0.24   1
  -2  -8   7    0.28    0.29   1
  -2  -8   7    0.57    0.25   1
   1   8  -7   -0.21    0.27   1
  -1  -8   7   -0.03    0.23   1
  -1  -8   7    0.09    0.23   1
  -1  -8   7   -0.13    0.26   1
   0  -8  -8   -0.11    0.26  -2
   0   8  -7   -0.11    0.26   1
   0   8   8    0.14    0.26  -2
   0  -8   7    0.14    0.26   1
   0   8   8    0.01    0.27  -2
   0  -8   7    0.01    0.27   1
   1  -8   7    1.31    0.30   1
   1  -8   7    1.20    0.36   1
   2  -8   7    1.18    0.34   1
   2  -8   7    1.35    0.37   1
   5   7  -7    0.48    0.34   1
  -5  -7   7   -0.20    0.15   1
  -5  -7   7    0.31    0.28   1
  -5  -7   7    1.14    0.27   1
  -4  -7  -9    0.21    0.31  -2
   4   7  -7    0.21    0.31   1
   4   7   9    0.10    0.21  -2
  -4  -7   7    0.10    0.21   1
   4   7   9    0.10    0.26  -2
  -4  -7   7    0.10    0.26   1
   4   7   9    0.81    0.30  -2
  -4  -7   7    0.81    0.30   1
   3   7  -7    1.80    0.36   1
  -3  -7   7    1.56    0.29   1
  -3  -7   7    1.23    0.32   1
  -3  -7   7    1.40    0.31   1
   2   7  -7    1.60    0.34   1
  -2  -7   7    1.60    0.26   1
  -2  -7   7    0.92    0.32   1
  -2  -7   7    0.88    0.26   1
  -2  -7   7    1.04    0.32   1
   1   7  -7   -0.23    0.24   1
  -1  -7   7    0.05    0.22   1
  -1  -7   7   -0.05    0.25   1
  -1  -7   7    0.15    0.22   1
   0  -7  -8    0.42    0.24  -2
   0   7  -7    0.42    0.24   1
   0   7   8    0.30    0.26  -2
   0  -7   7    0.30    0.26   1
   0   7   8    0.23    0.23  -2
   0  -7   7    0.23    0.23   1
   1  -7   7    0.79    0.25   1
   1  -7   7    0.40    0.29   1
  -2   7  -7    0.15    0.26   1
   2  -7   7    0.33    0.26   1
   2  -7   7    0.05    0.31   1
   3  -7  -7    0.66    0.33  -2
  -3   7  -7    0.66    0.33   1
  -3   7   7    1.06    0.32  -2
   3  -7   7    1.06    0.32   1
  -3   7   7    1.12    0.36  -2
   3  -7   7    1.12    0.36   1
  -4   7  -7    3.53    0.55   1
   4  -7   7    3.39    0.53   1
   4  -7   7    3.81    0.51   1
   4  -7   7    3.09    0.52   1
   6   6  -7   -0.03    0.28   1
  -6  -6   7    0.07    0.21   1
   5   6  -7    0.30    0.29   1
  -5  -6   7   -0.10    0.22   1
  -5  -6   7   -0.15    0.24   1
  -5  -6   7    0.14    0.23   1
  -4  -6  -9    1.46    0.33  -2
   4   6  -7    1.46    0.33   1
   4   6   9    1.42    0.27  -2
  -4  -6   7    1.42    0.27   1
   4   6   9    1.47    0.28  -2
  -4  -6   7    1.47    0.28   1
   4   6   9    1.20    0.31  -2
  -4  -6   7    1.20    0.31   1
   3   6  -7    1.34    0.31   1
  -3  -6   7    0.71    0.27   1
  -3  -6   7    1.20    0.27   1
  -3  -6   7    0.93    0.25   1
   2   6  -7    0.29    0.24   1
  -2  -6   7   -0.07    0.19   1
  -2  -6   7    0.08    0.23   1
  -2  -6   7   -0.02    0.23   1
  -1  -6  -8    0.13    0.24  -2
   1   6  -7    0.13    0.24   1
   1   6   8   -0.06    0.22  -2
  -1  -6   7   -0.06    0.22   1
   1   6   8    0.04    0.19  -2
  -1  -6   7    0.04    0.19   1
   1   6   8    0.07    0.21  -2
  -1  -6   7    0.07    0.21   1
   0   6  -7    3.24    0.36   1
   0  -6   7    3.21    0.36   1
   0  -6   7    2.39    0.36   1
   1  -6   7    2.19    0.34   1
   1  -6   7    2.58    0.32   1
  -2   6  -7    4.53    0.52   1
   2  -6   7    4.70    0.51   1
   2  -6   7    4.79    0.48   1
   3  -6  -7   -0.10    0.27  -2
  -3   6  -7   -0.10    0.27   1
  -3   6   7    0.07    0.28  -2
   3  -6   7    0.07    0.28   1
  -3   6   7    0.24    0.26  -2
   3  -6   7    0.24    0.26   1
  -3   6   7   -0.02    0.30  -2
   3  -6   7   -0.02    0.30   1
  -4   6  -7    3.58    0.52   1
   4  -6   7    3.94    0.46   1
   4  -6   7    3.83    0.47   1
   4  -6   7    3.23    0.49   1
  -5   6  -7    0.00    0.35   1
   5  -6   7    0.00    0.33   1
   5  -6   7    0.32    0.34   1
   5  -6   7   -0.24    0.35   1
   6   5  -7    0.04    0.30   1
  -6  -5   7    0.07    0.21   1
  -5  -5  -9    0.05    0.26  -2
   5   5  -7    0.05    0.26   1
   5   5   9    0.28    0.20  -2
  -5  -5   7    0.28    0.20   1
   5   5   9   -0.21    0.24  -2
  -5  -5   7   -0.21    0.24   1
   4   5  -7    2.24    0.33   1
  -4  -5   7    1.16    0.24   1
  -4  -5   7    1.91    0.30   1
  -4  -5   7    1.60    0.32   1
   3   5  -7    0.83    0.26   1
  -3  -5   7    0.57    0.22   1
  -3  -5   7    0.46    0.20   1
  -3  -5   7    0.27    0.25   1
   2   5  -7    0.11    0.22   1
   2   5  -7    0.06    0.14   1
  -2  -5   7    0.02    0.20   1
  -2  -5   7    0.15    0.16   1
  -2  -5   7    0.03    0.20   1
  -2  -5   7    0.00    0.17   1
  -1  -5  -8    0.88    0.23  -2
   1   5  -7    0.88    0.23   1
  -1  -5  -8    0.06    0.16  -2
   1   5  -7    0.06    0.16   1
   1   5   8    0.53    0.21  -2
  -1  -5   7    0.53    0.21   1
   1   5   8    0.69    0.18  -2
  -1  -5   7    0.69    0.18   1
   1   5   8    0.71    0.21  -2
  -1  -5   7    0.71    0.21   1
   1   5   8    0.85    0.19  -2
  -1  -5   7    0.85    0.19   1
   0   5  -7    1.74    0.26   1
   0  -5   7    1.66    0.27   1
   0  -5   7    1.65    0.27   1
   1  -5   7    0.31    0.21   1
   1  -5   7    0.43    0.21   1
   2  -5  -7    1.27    0.26  -2
  -2   5  -7    1.27    0.26   1
  -2   5   7    0.88    0.24  -2
   2  -5   7    0.88    0.24   1
  -2   5   7    1.09    0.25  -2
   2  -5   7    1.09    0.25   1
  -2   5   7    1.08    0.27  -2
   2  -5   7    1.08    0.27   1
  -3   5  -7    7.06    0.64   1
  -3   5  -7    4.96    0.57   1
   3  -5   7    7.86    0.64   1
   3  -5   7    6.36    0.63   1
   3  -5   7    6.78    0.63   1
  -4   5  -7    0.23    0.30   1
   4  -5   7    0.30    0.26   1
   4  -5   7    0.15    0.26   1
  -5   5  -7   -0.19    0.17   1
  -5   5  -7    0.07    0.38   1
   5  -5   7    0.00    0.32   1
   5  -5   7    0.26    0.33   1
   5  -5   7    0.00    0.29   1
  -7  -4   7    0.06    0.30   1
   6   4  -7    0.39    0.25   1
  -6  -4   7   -0.09    0.22   1
  -6  -4   7    0.04    0.24   1
  -5  -4  -9    2.83    0.36  -2
   5   4  -7    2.83    0.36   1
   5   4   9    2.31    0.31  -2
  -5  -4   7    2.31    0.31   1
   5   4   9    2.03    0.33  -2
  -5  -4   7    2.03    0.33   1
   4   4  -7    2.24    0.32   1
  -4  -4   7    1.75    0.25   1
  -4  -4   7    1.30    0.23   1
  -4  -4   7    1.68    0.29   1
   3   4  -7    0.04    0.19   1
  -3  -4   7   -0.12    0.18   1
  -3  -4   7   -0.36    0.21   1
  -3  -4   7    0.14    0.16   1
  -2  -4  -8    0.39    0.20  -2
   2   4  -7    0.39    0.20   1
  -2  -4  -8    0.24    0.12  -2
   2   4  -7    0.24    0.12   1
   2   4   8    0.18    0.14  -2
  -2  -4   7    0.18    0.14   1
   2   4   8    0.15    0.18  -2
  -2  -4   7    0.15    0.18   1
   2   4   8   -0.13    0.18  -2
  -2  -4   7   -0.13    0.18   1
   2   4   8    0.29    0.22  -2
  -2  -4   7    0.29    0.22   1
   1   4  -7    3.26    0.37   1
   1   4  -7    3.20    0.33   1
   1   4  -7    3.00    0.31   1
  -1  -4   7    3.25    0.36   1
  -1  -4   7    3.34    0.34   1
   0   4  -7    4.91    0.45   1
   0  -4   7    4.70    0.49   1
   0  -4   7    4.76    0.46   1
   0  -4   7    5.08    0.47   1
  -1   4  -7    5.14    0.51   1
   1  -4   7    5.84    0.53   1
   1  -4   7    5.78    0.52   1
   1  -4   7    6.05    0.54   1
   1  -4   7    5.42    0.49   1
   2  -4  -7    0.11    0.20  -2
  -2   4  -7    0.11    0.20   1
  -2   4   7    0.09    0.20  -2
   2  -4   7    0.09    0.20   1
  -2   4   7    0.00    0.20  -2
   2  -4   7    0.00    0.20   1
  -2   4   7    0.35    0.21  -2
   2  -4   7    0.35    0.21   1
  -3   4  -7    2.49    0.36   1
  -3   4  -7    2.45    0.32   1
   3  -4   7    2.62    0.35   1
   3  -4   7    2.65    0.33   1
   3  -4   7    2.35    0.32   1
  -4   4  -7   -0.05    0.20   1
  -4   4  -7    0.25    0.27   1
  -4   4  -7    0.30    0.19   1
   4  -4   7    0.27    0.24   1
   4  -4   7    0.18    0.26   1
   4  -4   7   -0.04    0.22   1
   5  -4  -6    0.11    0.31  -2
  -5   4  -7    0.11    0.31   1
   5  -4  -6   -0.13    0.24  -2
  -5   4  -7   -0.13    0.24   1
  -5   4   6    0.07    0.23  -2
   5  -4   7    0.07    0.23   1
  -5   4   6    0.12    0.27  -2
   5  -4   7    0.12    0.27   1
  -5   4   6   -0.07    0.29  -2
   5  -4   7   -0.07    0.29   1
  -6   4  -7    0.37    0.39   1
  -6   4  -7    0.19    0.31   1
   6  -4   7    0.68    0.33   1
   6  -4   7    0.69    0.33   1
   7   3  -7    0.01    0.26   1
   7   3  -7   -0.06    0.26   1
  -7  -3   7    0.06    0.26   1
  -7  -3   7   -0.16    0.29   1
  -6  -3  -9    0.38    0.22  -2
   6   3  -7    0.38    0.22   1
  -6  -3  -9    0.26    0.24  -2
   6   3  -7    0.26    0.24   1
   6   3   9    0.23    0.25  -2
  -6  -3   7    0.23    0.25   1
   6   3   9    0.17    0.22  -2
  -6  -3   7    0.17    0.22   1
   5   3  -7    1.28    0.26   1
   5   3  -7    1.11    0.23   1
  -5  -3   7    1.28    0.29   1
  -5  -3   7    1.08    0.23   1
   4   3  -7    0.08    0.19   1
   4   3  -7    0.22    0.17   1
  -4  -3   7   -0.07    0.16   1
  -4  -3   7    0.09    0.15   1
  -4  -3   7    0.22    0.22   1
   3   3  -7    0.21    0.11   1
   3   3  -7    0.80    0.20   1
   3   3  -7    0.41    0.14   1
  -3  -3   7    0.61    0.22   1
  -3  -3   7    0.39    0.18   1
  -3  -3   7    0.40    0.15   1
  -2  -3  -8    1.61    0.23  -2
   2   3  -7    1.61    0.23   1
  -2  -3  -8    1.96    0.25  -2
   2   3  -7    1.96    0.25   1
   2   3   8    1.96    0.21  -2
  -2  -3   7    1.96    0.21   1
   2   3   8    1.80    0.24  -2
  -2  -3   7    1.80    0.24   1
   2   3   8    1.85    0.25  -2
  -2  -3   7    1.85    0.25   1
   1   3  -7    2.09    0.26   1
   1   3  -7    2.14    0.26   1
   1   3  -7    2.21    0.23   1
  -1  -3   7    2.07    0.24   1
  -1  -3   7    1.95    0.28   1
  -1  -3   7    1.98    0.27   1
   0   3  -7    0.42    0.15   1
   0   3  -7    0.62    0.16   1
   0  -3   7    0.55    0.18   1
   0  -3   7    0.63    0.17   1
   0  -3   7    0.40    0.19   1
   0  -3   7    0.75    0.19   1
   1  -3  -7    1.39    0.21  -2
  -1   3  -7    1.39    0.21   1
  -1   3   7    1.40    0.21  -2
   1  -3   7    1.40    0.21   1
  -1   3   7    1.00    0.22  -2
   1  -3   7    1.00    0.22   1
  -1   3   7    1.60    0.23  -2
   1  -3   7    1.60    0.23   1
  -1   3   7    1.89    0.24  -2
   1  -3   7    1.89    0.24   1
  -2   3  -7    8.86    0.78   1
   2  -3   7    8.88    0.78   1
   2  -3   7    9.70    0.78   1
   2  -3   7    8.78    0.77   1
   2  -3   7    9.75    0.78   1
  -3   3  -7    0.56    0.21   1
  -3   3  -7    0.85    0.24   1
   3  -3   7    0.57    0.20   1
   3  -3   7    0.22    0.20   1
   3  -3   7    0.29    0.22   1
  -4   3  -7    1.21    0.24   1
  -4   3  -7    1.93    0.32   1
  -4   3  -7    1.21    0.23   1
   4  -3   7    1.51    0.26   1
   4  -3   7    1.12    0.23   1
   4  -3   7    1.33    0.27   1
   5  -3  -6    0.68    0.24  -2
  -5   3  -7    0.68    0.24   1
   5  -3  -6    0.55    0.21  -2
  -5   3  -7    0.55    0.21   1
   5  -3  -6    1.11    0.33  -2
  -5   3  -7    1.11    0.33   1
  -5   3   6    0.74    0.27  -2
   5  -3   7    0.74    0.27   1
  -5   3   6    0.69    0.28  -2
   5  -3   7    0.69    0.28   1
  -6   3  -7    0.63    0.29   1
  -6   3  -7    0.23    0.34   1
   6  -3   7    0.27    0.27   1
   6  -3   7    0.51    0.28   1
   7   2  -7    0.21    0.25   1
   7   2  -7    0.41    0.28   1
  -7  -2   7    0.37    0.33   1
  -7  -2   7    0.12    0.27   1
  -6  -2  -9    2.64    0.36  -2
   6   2  -7    2.64    0.36   1
  -6  -2  -9    2.99    0.40  -2
   6   2  -7    2.99    0.40   1
   6   2   9    2.42    0.34  -2
  -6  -2   7    2.42    0.34   1
   6   2   9    2.47    0.40  -2
  -6  -2   7    2.47    0.40   1
   5   2  -7    1.41    0.25   1
   5   2  -7    1.59    0.30   1
  -5  -2   7    1.32    0.27   1
  -5  -2   7    1.28    0.30   1
   4   2  -7    1.25    0.24   1
   4   2  -7    1.00    0.19   1
  -4  -2   7    0.55    0.20   1
  -4  -2   7    0.82    0.24   1
  -3  -2  -8    0.69    0.16  -2
   3   2  -7    0.69    0.16   1
  -3  -2  -8    0.52    0.20  -2
   3   2  -7    0.52    0.20   1
  -3  -2  -8    0.55    0.14  -2
   3   2  -7    0.55    0.14   1
   3   2   8    0.33    0.19  -2
  -3  -2   7    0.33    0.19   1
   3   2   8    0.86    0.18  -2
  -3  -2   7    0.86    0.18   1
   3   2   8    0.70    0.17  -2
  -3  -2   7    0.70    0.17   1
   2   2  -7    1.78    0.23   1
   2   2  -7    1.11    0.16   1
   2   2  -7    1.22    0.22   1
   2   2  -7    1.33    0.19   1
  -2  -2   7    1.72    0.19   1
  -2  -2   7    1.22    0.17   1
  -2  -2   7    1.23    0.22   1
  -2  -2   7    1.20    0.22   1
  -2  -2   7    1.13    0.16   1
  -2  -2   7    0.54    0.18   1
   1   2  -7    9.35    0.76   1
   1   2  -7    9.68    0.77   1
   1   2  -7    9.46    0.75   1
   1   2  -7    9.80    0.77   1
  -1  -2   7    9.13    0.79   1
  -1  -2   7    9.36    0.75   1
  -1  -2   7    8.17    0.77   1
   0   2  -7    4.20    0.40   1
   0   2  -7    4.82    0.41   1
   0   2  -7    4.77    0.41   1
   0   2  -7    4.33    0.42   1
   0  -2   7    4.75    0.43   1
   0  -2   7    4.14    0.41   1
   0  -2   7    4.65    0.41   1
   0  -2   7    3.86    0.43   1
   1  -2  -7    0.58    0.16  -2
  -1   2  -7    0.58    0.16   1
   1  -2  -7    0.57    0.16  -2
  -1   2  -7    0.57    0.16   1
  -1   2   7    0.39    0.19  -2
   1  -2   7    0.39    0.19   1
  -1   2   7    0.10    0.18  -2
   1  -2   7    0.10    0.18   1
  -1   2   7    0.29    0.17  -2
   1  -2   7    0.29    0.17   1
  -2   2  -7    0.74    0.21   1
  -2   2  -7    0.37    0.19   1
  -2   2  -7    0.26    0.15   1
   2  -2   7    0.34    0.16   1
   2  -2   7    0.45    0.18   1
   2  -2   7    0.45    0.19   1
   2  -2   7    0.75    0.18   1
  -3   2  -7    0.64    0.22   1
  -3   2  -7    0.47    0.17   1
  -3   2  -7    0.49    0.23   1
   3  -2   7    0.63    0.19   1
   3  -2   7    0.82    0.17   1
   3  -2   7    0.64    0.19   1
   3  -2   7    0.30    0.17   1
   4  -2  -6   -0.04    0.17  -2
  -4   2  -7   -0.04    0.17   1
   4  -2  -6    0.31    0.21  -2
  -4   2  -7    0.31    0.21   1
   4  -2  -6    0.01    0.24  -2
  -4   2  -7    0.01    0.24   1
  -4   2   6    0.11    0.18  -2
   4  -2   7    0.11    0.18   1
  -4   2   6    0.14    0.20  -2
   4  -2   7    0.14    0.20   1
  -4   2   6    0.14    0.20  -2
   4  -2   7    0.14    0.20   1
  -5   2  -7    0.13    0.29   1
   5  -2   7    0.07    0.24   1
   5  -2   7    0.16    0.18   1
  -6   2  -7    0.47    0.31   1
   6  -2   7   -0.23    0.26   1
   6  -2   7   -0.10    0.22   1
  -7   2  -7   -0.22    0.34   1
   7  -2   7    0.64    0.22   1
   7  -2   7    0.14    0.28   1
   7  -2   7    0.42    0.28   1
  -7  -1  -9    1.69    0.31  -2
   7   1  -7    1.69    0.31   1
  -7  -1  -9    1.26    0.33  -2
   7   1  -7    1.26    0.33   1
   7   1   9    1.40    0.33  -2
  -7  -1   7    1.40    0.33   1
   7   1   9    1.25    0.31  -2
  -7  -1   7    1.25    0.31   1
   6   1  -7    0.13    0.22   1
   6   1  -7    0.09    0.27   1
  -6  -1   7    0.27    0.25   1
  -6  -1   7    0.24    0.23   1
  -6  -1   7    0.02    0.27   1
   5   1  -7    1.27    0.24   1
   5   1  -7    1.01    0.25   1
  -5  -1   7    1.32    0.28   1
  -5  -1   7    1.63    0.27   1
  -5  -1   7    1.23    0.27   1
   4   1  -7    2.95    0.31   1
   4   1  -7    2.92    0.34   1
  -4  -1   7    2.86    0.33   1
  -4  -1   7    2.82    0.34   1
  -4  -1   7    2.87    0.35   1
  -3  -1  -8    3.95    0.34  -2
   3   1  -7    3.95    0.34   1
  -3  -1  -8    2.78    0.33  -2
   3   1  -7    2.78    0.33   1
  -3  -1  -8    3.61    0.37  -2
   3   1  -7    3.61    0.37   1
   3   1   8    2.76    0.33  -2
  -3  -1   7    2.76    0.33   1
   3   1   8    4.56    0.38  -2
  -3  -1   7    4.56    0.38   1
   3   1   8    3.73    0.39  -2
  -3  -1   7    3.73    0.39   1
   2   1  -7    2.09    0.26   1
   2   1  -7    2.11    0.23   1
   2   1  -7    1.57    0.20   1
   2   1  -7    2.27    0.26   1
   2   1  -7    1.79    0.20   1
  -2  -1   7    1.60    0.26   1
  -2  -1   7    1.68    0.22   1
  -2  -1   7    1.55    0.24   1
  -2  -1   7    1.88    0.24   1
  -2  -1   7    1.68    0.23   1
   1   1  -7    0.33    0.15   1
   1   1  -7    0.33    0.15   1
   1   1  -7    0.12    0.12   1
  -1  -1   7    0.23    0.18   1
  -1  -1   7    0.07    0.13   1
  -1  -1   7    0.15    0.16   1
   0  -1  -7    2.34    0.25  -2
   0   1  -7    2.34    0.25   1
   0  -1  -7    2.65    0.29  -2
   0   1  -7    2.65    0.29   1
   0  -1  -7    2.55    0.27  -2
   0   1  -7    2.55    0.27   1
   0  -1  -7    3.74    0.31  -2
   0   1  -7    3.74    0.31   1
   0   1   7    2.28    0.26  -2
   0  -1   7    2.28    0.26   1
   0   1   7    2.58    0.27  -2
   0  -1   7    2.58    0.27   1
   0   1   7    2.57    0.28  -2
   0  -1   7    2.57    0.28   1
   0   1   7    2.68    0.30  -2
   0  -1   7    2.68    0.30   1
  -1   1  -7    6.84    0.58   1
  -1   1  -7    7.63    0.58   1
  -1   1  -7    6.85    0.58   1
  -1   1  -7    7.32    0.59   1
   1  -1   7    6.50    0.60   1
   1  -1   7    5.96    0.57   1
   1  -1   7    7.18    0.59   1
   1  -1   7    7.28    0.59   1
   1  -1   7    6.75    0.59   1
  -2   1  -7    0.10    0.13   1
  -2   1  -7   -0.02    0.16   1
  -2   1  -7    0.04    0.20   1
  -2   1  -7    0.17    0.13   1
   2  -1   7    0.04    0.16   1
   2  -1   7    0.26    0.17   1
   2  -1   7   -0.18    0.17   1
   2  -1   7   -0.17    0.13   1
   2  -1   7    0.00    0.17   1
  -3   1  -7    5.23    0.51   1
  -3   1  -7    5.58    0.51   1
  -3   1  -7    5.37    0.48   1
   3  -1   7    6.50    0.50   1
   3  -1   7    5.18    0.50   1
   3  -1   7    5.04    0.49   1
   3  -1   7    5.44    0.48   1
   4  -1  -6    3.87    0.43  -2
  -4   1  -7    3.87    0.43   1
   4  -1  -6    3.30    0.39  -2
  -4   1  -7    3.30    0.39   1
  -4   1   6    3.91    0.39  -2
   4  -1   7    3.91    0.39   1
  -4   1   6    3.89    0.39  -2
   4  -1   7    3.89    0.39   1
  -5   1  -7    0.50    0.28   1
   5  -1   7    0.39    0.19   1
   5  -1   7    0.37    0.22   1
  -6   1  -7    0.77    0.30   1
   6  -1   7    0.18    0.26   1
   6  -1   7    0.69    0.21   1
   6  -1   7    0.31    0.24   1
   7  -1  -5    0.30    0.32  -2
  -7   1  -7    0.30    0.32   1
  -7   1   5    0.09    0.31  -2
   7  -1   7    0.09    0.31   1
  -7   1   5    0.03    0.23  -2
   7  -1   7    0.03    0.23   1
  -7   1   5    0.13    0.24  -2
   7  -1   7    0.13    0.24   1
  -7   0  -9    1.42    0.32  -2
   7   0  -7    1.42    0.32   1
  -7   0  -9    0.67    0.33  -2
   7   0  -7    0.67    0.33   1
   7   0   9    0.90    0.32  -2
  -7   0   7    0.90    0.32   1
   7   0   9    1.49    0.37  -2
  -7   0   7    1.49    0.37   1
   6   0  -7    1.20    0.26   1
   6   0  -7    0.24    0.26   1
  -6   0   7    0.46    0.28   1
  -6   0   7    0.57    0.29   1
   5   0  -7    3.97    0.36   1
   5   0  -7    3.49    0.38   1
  -5   0   7    2.65    0.37   1
  -5   0   7    2.20    0.37   1
  -5   0   7    2.01    0.35   1
  -4   0  -8    1.02    0.20  -2
   4   0  -7    1.02    0.20   1
  -4   0  -8    1.18    0.23  -2
   4   0  -7    1.18    0.23   1
  -4   0  -8    0.45    0.17  -2
   4   0  -7    0.45    0.17   1
   4   0   8    1.06    0.24  -2
  -4   0   7    1.06    0.24   1
   4   0   8    0.51    0.23  -2
  -4   0   7    0.51    0.23   1
   4   0   8    0.67    0.23  -2
  -4   0   7    0.67    0.23   1
   3   0  -7    0.63    0.16   1
   3   0  -7    0.90    0.20   1
   3   0  -7    0.69    0.15   1
   3   0  -7    0.75    0.14   1
  -3   0   7    0.54    0.21   1
  -3   0   7    0.77    0.19   1
  -3   0   7    0.95    0.21   1
  -3   0   7    0.49    0.18   1
   2   0  -7    7.43    0.62   1
   2   0  -7    7.71    0.59   1
   2   0  -7    7.34    0.57   1
   2   0  -7    6.99    0.58   1
  -2   0   7    6.33    0.60   1
  -2   0   7    7.24    0.60   1
  -2   0   7    7.35    0.60   1
  -2   0   7    5.33    0.61   1
  -2   0   7    6.72    0.60   1
   1   0  -7    1.66    0.20   1
   1   0  -7    2.20    0.24   1
   1   0  -7    1.49    0.18   1
   1   0  -7    1.42    0.19   1
  -1   0   7    1.28    0.21   1
  -1   0   7    1.73    0.20   1
  -1   0   7    1.44    0.21   1
  -1   0   7    1.24    0.22   1
   0   0  -7    0.68    0.13  -2
   0   0  -7    0.68    0.13   1
   0   0  -7    0.96    0.14  -2
   0   0  -7    0.96    0.14   1
   0   0  -7    0.94    0.15  -2
   0   0  -7    0.94    0.15   1
   0   0  -7    0.68    0.14  -2
   0   0  -7    0.68    0.14   1
   0   0   7    0.67    0.16  -2
   0   0   7    0.67    0.16   1
   0   0   7    0.65    0.15  -2
   0   0   7    0.65    0.15   1
   0   0   7    0.52    0.18  -2
   0   0   7    0.52    0.18   1
   0   0   7    0.61    0.14  -2
   0   0   7    0.61    0.14   1
  -1   0  -7    0.01    0.12   1
  -1   0  -7    0.02    0.14   1
  -1   0  -7    0.55    0.15   1
  -1   0  -7    0.00    0.12   1
  -1   0  -7    0.32    0.16   1
   1   0   7    0.23    0.15   1
   1   0   7    0.09    0.16   1
   1   0   7    0.20    0.16   1
   1   0   7    0.19    0.13   1
  -2   0  -7    2.40    0.25   1
  -2   0  -7    2.31    0.25   1
  -2   0  -7    1.84    0.26   1
  -2   0  -7    2.38    0.29   1
  -2   0  -7    2.26    0.26   1
  -2   0  -7    2.13    0.24   1
   2   0   7    2.36    0.26   1
   2   0   7    2.08    0.27   1
   2   0   7    2.15    0.27   1
   2   0   7    2.56    0.27   1
   2   0   7    2.59    0.28   1
  -3   0  -7    0.79    0.19   1
  -3   0  -7    0.79    0.15   1
  -3   0  -7    0.83    0.15   1
  -3   0  -7    1.10    0.16   1
   3   0   7    1.53    0.21   1
   3   0   7    0.93    0.20   1
   3   0   7    0.74    0.18   1
   3   0   7    0.71    0.17   1
   3   0   7    0.64    0.19   1
   4   0  -6    0.41    0.19  -2
  -4   0  -7    0.41    0.19   1
  -4   0   6    0.18    0.17  -2
   4   0   7    0.18    0.17   1
  -4   0   6    0.33    0.17  -2
   4   0   7    0.33    0.17   1
  -4   0   6    0.25    0.18  -2
   4   0   7    0.25    0.18   1
   5   0   7    0.33    0.20   1
   5   0   7    0.06    0.16   1
   5   0   7    0.11    0.21   1
   6   0   7   -0.05    0.20   1
   6   0   7   -0.09    0.23   1
   6   0   7   -0.01    0.19   1
  -7   0   5    0.63    0.24  -2
   7   0   7    0.63    0.24   1
  -7   0   5    0.29    0.20  -2
   7   0   7    0.29    0.20   1
  -7   1  -9   -0.02    0.31  -2
   7  -1  -7   -0.02    0.31   1
  -7   1  -9    0.51    0.24  -2
   7  -1  -7    0.51    0.24   1
   7  -1   9    0.46    0.32  -2
  -7   1   7    0.46    0.32   1
   7  -1   9    0.70    0.32  -2
  -7   1   7    0.70    0.32   1
   6  -1  -7    1.20    0.26   1
   6  -1  -7    1.18    0.32   1
  -6   1   7    2.17    0.38   1
  -6   1   7    0.97    0.30   1
   5  -1  -7    3.77    0.45   1
  -5   1   7    4.12    0.46   1
  -5   1   7    3.47    0.44   1
  -4   1  -8    2.40    0.32  -2
   4  -1  -7    2.40    0.32   1
  -4   1  -8    1.83    0.23  -2
   4  -1  -7    1.83    0.23   1
  -4   1  -8    2.03    0.25  -2
   4  -1  -7    2.03    0.25   1
   4  -1   8    1.80    0.28  -2
  -4   1   7    1.80    0.28   1
   4  -1   8    1.43    0.30  -2
  -4   1   7    1.43    0.30   1
   4  -1   8    2.22    0.32  -2
  -4   1   7    2.22    0.32   1
   3  -1  -7    2.01    0.22   1
   3  -1  -7    2.09    0.22   1
   3  -1  -7    2.35    0.27   1
  -3   1   7    1.21    0.25   1
  -3   1   7    1.96    0.27   1
  -3   1   7    1.31    0.23   1
  -3   1   7    1.32    0.28   1
   2  -1  -7   -0.01    0.17   1
   2  -1  -7    0.07    0.13   1
   2  -1  -7    0.17    0.15   1
   2  -1  -7    0.16    0.14   1
  -2   1   7   -0.06    0.19   1
  -2   1   7    0.00    0.16   1
  -2   1   7    0.01    0.18   1
  -2   1   7    0.10    0.19   1
   1  -1  -7    4.71    0.44   1
   1  -1  -7    5.74    0.45   1
   1  -1  -7    4.67    0.44   1
   1  -1  -7    5.02    0.45   1
  -1   1   7    5.12    0.46   1
  -1   1   7    3.72    0.46   1
  -1   1   7    5.32    0.48   1
  -1   1   7    5.64    0.47   1
   0   1  -7    3.53    0.32  -2
   0  -1  -7    3.53    0.32   1
   0   1  -7    3.28    0.31  -2
   0  -1  -7    3.28    0.31   1
   0   1  -7    2.84    0.30  -2
   0  -1  -7    2.84    0.30   1
   0   1  -7    2.89    0.30  -2
   0  -1  -7    2.89    0.30   1
   0  -1   7    2.89    0.32  -2
   0   1   7    2.89    0.32   1
   0  -1   7    2.23    0.28  -2
   0   1   7    2.23    0.28   1
   0  -1   7    3.21    0.32  -2
   0   1   7    3.21    0.32   1
   0  -1   7    2.91    0.31  -2
   0   1   7    2.91    0.31   1
  -1  -1  -7    2.41    0.25   1
  -1  -1  -7    1.75    0.22   1
  -1  -1  -7    1.76    0.21   1
  -1  -1  -7    1.78    0.22   1
  -1  -1  -7    2.18    0.25   1
   1   1   7    1.84    0.23   1
   1   1   7    1.82    0.22   1
   1   1   7    1.53    0.24   1
   1   1   7    1.72    0.25   1
  -2  -1  -7   11.21    0.80   1
  -2  -1  -7    9.95    0.78   1
  -2  -1  -7   10.33    0.79   1
  -2  -1  -7    9.84    0.80   1
  -2  -1  -7   10.16    0.79   1
  -2  -1  -7    9.38    0.80   1
   2   1   7    9.98    0.80   1
   2   1   7    8.39    0.82   1
   2   1   7    9.48    0.80   1
   2   1   7   11.21    0.82   1
   2   1   7    7.64    0.80   1
   3   1  -6   10.13    0.77  -2
  -3  -1  -7   10.13    0.77   1
   3   1  -6    9.60    0.78  -2
  -3  -1  -7    9.60    0.78   1
   3   1  -6    9.63    0.80  -2
  -3  -1  -7    9.63    0.80   1
   3   1  -6    9.23    0.77  -2
  -3  -1  -7    9.23    0.77   1
  -3  -1   6   10.64    0.80  -2
   3   1   7   10.64    0.80   1
  -3  -1   6    9.01    0.80  -2
   3   1   7    9.01    0.80   1
  -3  -1   6    9.30    0.79  -2
   3   1   7    9.30    0.79   1
  -3  -1   6   11.00    0.80  -2
   3   1   7   11.00    0.80   1
  -3  -1   6    8.34    0.80  -2
   3   1   7    8.34    0.80   1
  -3  -1   6    9.52    0.78  -2
   3   1   7    9.52    0.78   1
  -4  -1  -7    1.70    0.20   1
  -4  -1  -7    1.63    0.23   1
   4   1   7    1.78    0.22   1
   4   1   7    1.90    0.25   1
   4   1   7    1.58    0.24   1
   4   1   7    1.89    0.27   1
  -5  -1  -7    0.22    0.17   1
   5   1   7    0.23    0.20   1
   5   1   7    0.32    0.17   1
   5   1   7    0.30    0.19   1
  -6  -1  -7    0.55    0.22   1
   6   1   7    0.41    0.20   1
   6   1   7    0.93    0.24   1
   7   1  -5    1.37    0.32  -2
  -7  -1  -7    1.37    0.32   1
  -7  -1   5    1.97    0.33  -2
   7   1   7    1.97    0.33   1
  -7  -1   5    1.58    0.31  -2
   7   1   7    1.58    0.31   1
   7  -2  -7    0.60    0.22   1
   7  -2  -7   -0.01    0.13   1
  -7   2   7    0.19    0.34   1
  -7   2   7    0.39    0.46   1
   6  -2  -7    2.65    0.35   1
   6  -2  -7    3.13    0.43   1
  -6   2   7    3.17    0.43   1
  -6   2   7    3.42    0.48   1
   5  -2  -7    0.23    0.27   1
  -5   2   7    0.65    0.29   1
  -5   2   7    0.70    0.30   1
  -4   2  -8    0.58    0.24  -2
   4  -2  -7    0.58    0.24   1
   4  -2   8    0.80    0.27  -2
  -4   2   7    0.80    0.27   1
   4  -2   8    0.26    0.24  -2
  -4   2   7    0.26    0.24   1
   4  -2   8    0.59    0.28  -2
  -4   2   7    0.59    0.28   1
   3  -2  -7    2.38    0.30   1
   3  -2  -7    1.98    0.25   1
   3  -2  -7    1.93    0.25   1
  -3   2   7    2.37    0.32   1
  -3   2   7    1.94    0.31   1
  -3   2   7    2.29    0.31   1
   2  -2  -7    1.69    0.24   1
   2  -2  -7    1.12    0.18   1
   2  -2  -7    1.42    0.21   1
   2  -2  -7    1.45    0.20   1
  -2   2   7    1.67    0.23   1
  -2   2   7    1.42    0.25   1
  -2   2   7    1.23    0.26   1
  -2   2   7    0.93    0.26   1
  -1   2  -7    0.39    0.17  -2
   1  -2  -7    0.39    0.17   1
  -1   2  -7    0.78    0.18  -2
   1  -2  -7    0.78    0.18   1
  -1   2  -7    0.49    0.17  -2
   1  -2  -7    0.49    0.17   1
  -1   2  -7    0.54    0.16  -2
   1  -2  -7    0.54    0.16   1
   1  -2   7    0.59    0.20  -2
  -1   2   7    0.59    0.20   1
   1  -2   7    0.57    0.21  -2
  -1   2   7    0.57    0.21   1
   1  -2   7    0.45    0.22  -2
  -1   2   7    0.45    0.22   1
   0  -2  -7    1.88    0.22   1
   0  -2  -7    1.98    0.23   1
   0  -2  -7    2.01    0.22   1
   0  -2  -7    2.02    0.24   1
   0  -2  -7    1.81    0.22   1
   0   2   7    1.27    0.26   1
   0   2   7    1.57    0.24   1
   0   2   7    1.53    0.25   1
   0   2   7    1.59    0.26   1
  -1  -2  -7    3.42    0.32   1
  -1  -2  -7    3.20    0.29   1
  -1  -2  -7    2.41    0.29   1
  -1  -2  -7    2.45    0.27   1
  -1  -2  -7    2.68    0.27   1
   1   2   7    2.98    0.32   1
   1   2   7    2.66    0.29   1
   1   2   7    2.18    0.28   1
   1   2   7    2.83    0.30   1
   1   2   7    2.71    0.33   1
  -2  -2  -7    1.35    0.20   1
  -2  -2  -7    1.09    0.19   1
  -2  -2  -7    0.98    0.14   1
  -2  -2  -7    1.18    0.18   1
  -2  -2  -7    1.00    0.21   1
  -2  -2  -7    0.84    0.15   1
  -2  -2  -7    0.81    0.18   1
   2   2   7    1.11    0.26   1
   2   2   7    0.86    0.19   1
   2   2   7    0.83    0.20   1
   2   2   7    1.09    0.22   1
   2   2   7    0.76    0.17   1
   2   2   7    0.75    0.20   1
   3   2  -6    1.04    0.19  -2
  -3  -2  -7    1.04    0.19   1
   3   2  -6    1.10    0.19  -2
  -3  -2  -7    1.10    0.19   1
   3   2  -6    1.23    0.16  -2
  -3  -2  -7    1.23    0.16   1
   3   2  -6    1.10    0.16  -2
  -3  -2  -7    1.10    0.16   1
  -3  -2   6    1.40    0.20  -2
   3   2   7    1.40    0.20   1
  -3  -2   6    1.26    0.24  -2
   3   2   7    1.26    0.24   1
  -3  -2   6    0.97    0.22  -2
   3   2   7    0.97    0.22   1
  -3  -2   6    1.34    0.18  -2
   3   2   7    1.34    0.18   1
  -3  -2   6    1.28    0.22  -2
   3   2   7    1.28    0.22   1
  -3  -2   6    1.37    0.21  -2
   3   2   7    1.37    0.21   1
  -4  -2  -7   -0.07    0.08   1
  -4  -2  -7   -0.03    0.16   1
   4   2   7    0.08    0.16   1
   4   2   7   -0.03    0.16   1
  -5  -2  -7    0.26    0.19   1
   5   2   7    0.39    0.19   1
   5   2   7    0.25    0.19   1
   6   2  -5    0.31    0.22  -2
  -6  -2  -7    0.31    0.22   1
  -6  -2   5    0.30    0.21  -2
   6   2   7    0.30    0.21   1
  -6  -2   5    0.32    0.25  -2
   6   2   7    0.32    0.25   1
  -6  -2   5    0.65    0.24  -2
   6   2   7    0.65    0.24   1
  -7  -2  -7   -0.27    0.26   1
   7   2   7   -0.03    0.25   1
   7   2   7    0.07    0.24   1
   7   2   7   -0.04    0.16   1
   6  -3  -7    1.38    0.39   1
   6  -3  -7    1.81    0.33   1
  -6   3   7    1.93    0.42   1
  -6   3   7    1.67    0.39   1
  -5   3  -8    1.26    0.36  -2
   5  -3  -7    1.26    0.36   1
   5  -3   8    1.05    0.35  -2
  -5   3   7    1.05    0.35   1
   5  -3   8    0.82    0.34  -2
  -5   3   7    0.82    0.34   1
   4  -3  -7    1.70    0.33   1
  -4   3   7    0.84    0.29   1
  -4   3   7    0.54    0.27   1
  -4   3   7    0.90    0.31   1
   3  -3  -7    0.32    0.22   1
  -3   3   7    0.20    0.25   1
  -3   3   7    0.44    0.25   1
   2  -3  -7    7.87    0.73   1
  -2   3   7    8.75    0.76   1
  -2   3   7    9.52    0.77   1
  -2   3   7    8.79    0.75   1
  -1   3  -7    1.66    0.23  -2
   1  -3  -7    1.66    0.23   1
   1  -3   7    0.88    0.22  -2
  -1   3   7    0.88    0.22   1
   1  -3   7    1.08    0.25  -2
  -1   3   7    1.08    0.25   1
   1  -3   7    1.46    0.24  -2
  -1   3   7    1.46    0.24   1
   0  -3  -7    2.87    0.30   1
   0  -3  -7    3.04    0.33   1
   0  -3  -7    2.97    0.30   1
   0  -3  -7    2.61    0.30   1
   0  -3  -7    2.86    0.30   1
   0   3   7    3.21    0.33   1
   0   3   7    2.59    0.34   1
   0   3   7    2.96    0.35   1
  -1  -3  -7    5.40    0.49   1
  -1  -3  -7    5.32    0.48   1
  -1  -3  -7    6.00    0.48   1
  -1  -3  -7    5.65    0.47   1
  -1  -3  -7    5.75    0.49   1
   1   3   7    4.94    0.52   1
   1   3   7    5.30    0.49   1
   1   3   7    5.02    0.49   1
   1   3   7    5.54    0.51   1
   1   3   7    3.79    0.52   1
   2   3  -6    8.26    0.69  -2
  -2  -3  -7    8.26    0.69   1
   2   3  -6    8.09    0.66  -2
  -2  -3  -7    8.09    0.66   1
   2   3  -6    9.15    0.69  -2
  -2  -3  -7    9.15    0.69   1
  -2  -3   6    8.40    0.69  -2
   2   3   7    8.40    0.69   1
  -2  -3   6    7.66    0.70  -2
   2   3   7    7.66    0.70   1
  -2  -3   6    8.45    0.68  -2
   2   3   7    8.45    0.68   1
  -2  -3   6    7.34    0.70  -2
   2   3   7    7.34    0.70   1
  -2  -3   6    8.00    0.72  -2
   2   3   7    8.00    0.72   1
  -3  -3  -7    3.06    0.30   1
  -3  -3  -7    2.38    0.30   1
  -3  -3  -7    3.16    0.34   1
  -3  -3  -7    3.73    0.34   1
   3   3   7    2.85    0.34   1
   3   3   7    3.66    0.33   1
   3   3   7    3.50    0.37   1
   3   3   7    3.41    0.34   1
  -4  -3  -7    0.35    0.19   1
   4   3   7    0.19    0.17   1
  -5  -3  -7    1.36    0.26   1
   5   3   7    1.42    0.24   1
   5   3   7    1.12    0.22   1
   6   3  -5    2.61    0.36  -2
  -6  -3  -7    2.61    0.36   1
  -6  -3   5    2.53    0.36  -2
   6   3   7    2.53    0.36   1
  -6  -3   5    2.81    0.36  -2
   6   3   7    2.81    0.36   1
  -7  -3  -7    0.41    0.30   1
   7   3   7   -0.30    0.26   1
   7   3   7    0.10    0.25   1
   7   3   7    0.21    0.25   1
   6  -4  -7    0.54    0.31   1
  -6   4   7    0.33    0.34   1
  -6   4   7   -0.06    0.35   1
  -5   4  -8    0.22    0.31  -2
   5  -4  -7    0.22    0.31   1
   5  -4   8    0.37    0.32  -2
  -5   4   7    0.37    0.32   1
   5  -4   8    0.51    0.31  -2
  -5   4   7    0.51    0.31   1
   5  -4   8    0.42    0.31  -2
  -5   4   7    0.42    0.31   1
   4  -4  -7    0.88    0.29   1
  -4   4   7    0.87    0.31   1
  -4   4   7    0.97    0.31   1
  -4   4   7    1.70    0.36   1
   3  -4  -7    2.51    0.38   1
  -3   4   7    3.79    0.43   1
  -3   4   7    3.26    0.41   1
  -2   4  -7    0.59    0.21  -2
   2  -4  -7    0.59    0.21   1
   2  -4   7    0.40    0.26  -2
  -2   4   7    0.40    0.26   1
   2  -4   7    0.84    0.27  -2
  -2   4   7    0.84    0.27   1
   2  -4   7    0.37    0.25  -2
  -2   4   7    0.37    0.25   1
   1  -4  -7    4.08    0.41   1
  -1   4   7    4.48    0.46   1
  -1   4   7    3.72    0.44   1
   0  -4  -7    0.95    0.19   1
   0   4   7    0.47    0.23   1
   0   4   7    0.91    0.22   1
  -1  -4  -7    0.12    0.10   1
  -1  -4  -7    0.09    0.16   1
  -1  -4  -7    0.11    0.16   1
   1   4   7    0.31    0.20   1
   1   4   7   -0.23    0.20   1
   1   4   7   -0.02    0.17   1
   2   4  -6    2.06    0.28  -2
  -2  -4  -7    2.06    0.28   1
   2   4  -6    2.17    0.24  -2
  -2  -4  -7    2.17    0.24   1
  -2  -4   6    2.15    0.28  -2
   2   4   7    2.15    0.28   1
  -2  -4   6    1.99    0.31  -2
   2   4   7    1.99    0.31   1
  -2  -4   6    2.21    0.25  -2
   2   4   7    2.21    0.25   1
  -3  -4  -7    0.04    0.13   1
  -3  -4  -7    0.16    0.16   1
   3   4   7   -0.12    0.19   1
   3   4   7   -0.05    0.23   1
  -4  -4  -7    0.32    0.20   1
   4   4   7    0.65    0.21   1
   4   4   7    0.23    0.22   1
   5   4  -5    0.36    0.22  -2
  -5  -4  -7    0.36    0.22   1
  -5  -4   5    0.43    0.21  -2
   5   4   7    0.43    0.21   1
  -6  -4  -7   -0.13    0.24   1
   6   4   7    0.14    0.22   1
  -7  -4  -7    0.35    0.27   1
   7   4   7   -0.62    0.15   1
   7   4   7    0.26    0.31   1
   5  -5  -7    0.04    0.23   1
  -5   5   7   -0.10    0.33   1
  -5   5   7    0.28    0.29   1
  -5   5   7   -0.16    0.34   1
   4  -5  -7    0.24    0.26   1
  -4   5   7    0.44    0.29   1
  -4   5   7    1.00    0.32   1
  -4   5   7    0.33    0.34   1
   3  -5  -7    5.82    0.63   1
  -3   5   7    7.23    0.70   1
  -3   5   7    6.75    0.69   1
  -2   5  -7    0.75    0.25  -2
   2  -5  -7    0.75    0.25   1
   2  -5   7    1.18    0.32  -2
  -2   5   7    1.18    0.32   1
   2  -5   7    0.58    0.30  -2
  -2   5   7    0.58    0.30   1
   1  -5  -7    1.08    0.23   1
  -1   5   7    0.98    0.28   1
  -1   5   7    0.85    0.30   1
  -1   5   7    1.10    0.28   1
   0  -5  -7    1.09    0.22   1
   0   5   7    1.35    0.27   1
   0   5   7    1.34    0.28   1
   1   5  -6    1.53    0.24  -2
  -1  -5  -7    1.53    0.24   1
  -1  -5   6    1.93    0.26  -2
   1   5   7    1.93    0.26   1
  -1  -5   6    2.12    0.30  -2
   1   5   7    2.12    0.30   1
  -1  -5   6    1.77    0.30  -2
   1   5   7    1.77    0.30   1
  -2  -5  -7    3.09    0.35   1
   2   5   7    2.63    0.38   1
   2   5   7    3.45    0.36   1
  -3  -5  -7    0.44    0.21   1
   3   5   7    0.06    0.21   1
   3   5   7    0.15    0.25   1
  -4  -5  -7    1.30    0.25   1
   4   5   7    1.30    0.31   1
   4   5   7    1.16    0.26   1
   5   5  -5    1.41    0.29  -2
  -5  -5  -7    1.41    0.29   1
  -5  -5   5    0.99    0.25  -2
   5   5   7    0.99    0.25   1
  -6  -5  -7    0.32    0.26   1
   6   5   7    0.34    0.26   1
   5  -6  -7    0.92    0.30   1
  -5   6   7   -0.65    0.42   1
  -5   6   7    0.29    0.38   1
  -5   6   7    0.73    0.33   1
   4  -6  -7    3.65    0.46   1
  -4   6   7    3.65    0.52   1
  -4   6   7    4.04    0.55   1
  -4   6   7    3.51    0.46   1
  -3   6  -7    0.20    0.28  -2
   3  -6  -7    0.20    0.28   1
   3  -6   7    0.44    0.34  -2
  -3   6   7    0.44    0.34   1
   3  -6   7    0.13    0.31  -2
  -3   6   7    0.13    0.31   1
   2  -6  -7    3.27    0.42   1
  -2   6   7    4.36    0.51   1
  -2   6   7    4.31    0.50   1
   1  -6  -7    0.45    0.23   1
  -1   6   7   -0.20    0.27   1
  -1   6   7    0.20    0.29   1
  -1   6   7    0.49    0.30   1
   0  -6  -7    0.28    0.19   1
   0   6   7    0.30    0.27   1
   0   6   7    0.01    0.25   1
   1   6  -6    0.75    0.22  -2
  -1  -6  -7    0.75    0.22   1
  -1  -6   6    1.17    0.33  -2
   1   6   7    1.17    0.33   1
  -1  -6   6    1.59    0.29  -2
   1   6   7    1.59    0.29   1
  -2  -6  -7    0.28    0.17   1
   2   6   7    0.21    0.28   1
   2   6   7    0.32    0.25   1
  -3  -6  -7    0.60    0.21   1
  -3  -6  -7    0.20    0.20   1
   3   6   7    0.44    0.24   1
   3   6   7    0.28    0.32   1
   4   6  -5    0.44    0.22  -2
  -4  -6  -7    0.44    0.22   1
  -4  -6   5    0.55    0.22  -2
   4   6   7    0.55    0.22   1
  -4  -6   5    1.03    0.33  -2
   4   6   7    1.03    0.33   1
  -5  -6  -7    0.43    0.24   1
   5   6   7    0.09    0.22   1
  -6  -6  -7    0.48    0.25   1
   4  -7  -7    3.01    0.41   1
  -4   7   7    3.19    0.54   1
  -4   7   7    2.46    0.44   1
  -4   7   7    3.01    0.51   1
   3  -7   7    0.70    0.38  -2
  -3   7   7    0.70    0.38   1
   3  -7   7    0.69    0.38  -2
  -3   7   7    0.69    0.38   1
  -2   7   7   -0.17    0.34   1
  -2   7   7    0.07    0.28   1
   1  -7  -7    0.12    0.19   1
  -1   7   7    0.37    0.32   1
  -1   7   7    0.37    0.31   1
   0   7  -6    0.28    0.19  -2
   0  -7  -7    0.28    0.19   1
   0  -7   6    0.77    0.30  -2
   0   7   7    0.77    0.30   1
   0  -7   6    0.88    0.34  -2
   0   7   7    0.88    0.34   1
  -1  -7  -7    0.97    0.23   1
   1   7   7    1.04    0.33   1
   1   7   7    1.40    0.30   1
  -2  -7  -7    0.97    0.24   1
   2   7   7    1.06    0.29   1
   2   7   7    0.65    0.34   1
  -3  -7  -7    0.38    0.22   1
   3   7   7    0.69    0.28   1
   3   7   7    0.70    0.36   1
   4   7  -5   -0.31    0.24  -2
  -4  -7  -7   -0.31    0.24   1
   4   7  -5    0.19    0.23  -2
  -4  -7  -7    0.19    0.23   1
  -4  -7   5   -0.03    0.35  -2
   4   7   7   -0.03    0.35   1
  -4  -7   5    0.15    0.25  -2
   4   7   7    0.15    0.25   1
  -5  -7  -7    0.66    0.25   1
   5   7   7   -0.02    0.24   1
   5   7   7    0.31    0.28   1
   2  -8  -7    0.05    0.24   1
  -2   8   7   -0.15    0.38   1
  -2   8   7    0.33    0.33   1
   1  -8  -7    0.14    0.21   1
  -1   8   7    0.20    0.33   1
  -1   8   7    0.05    0.32   1
   0   8  -6    0.55    0.22  -2
   0  -8  -7    0.55    0.22   1
   0  -8   6    0.51    0.34  -2
   0   8   7    0.51    0.34   1
   0  -8   6    0.40    0.30  -2
   0   8   7    0.40    0.30   1
  -1  -8  -7    0.35    0.22   1
   1   8   7    0.63    0.36   1
   1   8   7    0.09    0.33   1
  -2  -8  -7    0.31    0.22   1
   2   8   7   -0.13    0.29   1
   2   8   7   -0.47    0.35   1
   3   8  -5    0.82    0.25  -2
  -3  -8  -7    0.82    0.25   1
  -3  -8   5    1.17    0.45  -2
   3   8   7    1.17    0.45   1
  -3  -8   5    0.86    0.30  -2
   3   8   7    0.86    0.30   1
   4   8  -5    0.36    0.24  -2
  -4  -8  -7    0.36    0.24   1
   4   8  -5    0.00    0.26  -2
  -4  -8  -7    0.00    0.26   1
  -4  -8   5    0.32    0.37  -2
   4   8   7    0.32    0.37   1
  -4  -8   5    0.23    0.25  -2
   4   8   7    0.23    0.25   1
   0   9  -6    0.34    0.24  -2
   0  -9  -7    0.34    0.24   1
   0   9  -6    0.64    0.30  -2
   0  -9  -7    0.64    0.30   1
   0  -9   6    0.30    0.32  -2
   0   9   7    0.30    0.32   1
   0  -9   6   -0.03    0.36  -2
   0   9   7   -0.03    0.36   1
  -1  -9  -7    1.48    0.32   1
   1   9   7    1.49    0.45   1
   1   9   7    1.25    0.38   1
  -2  -9  -7    0.44    0.26   1
   2   9   7    0.27    0.37   1
   2   9   7   -0.14    0.40   1
  -3  -8 -10    0.35    0.32  -2
   3   8  -8    0.35    0.32   1
   3   8  10   -0.21    0.28  -2
  -3  -8   8   -0.21    0.28   1
   3   8  10    0.06    0.30  -2
  -3  -8   8    0.06    0.30   1
   3   8  10    0.44    0.27  -2
  -3  -8   8    0.44    0.27   1
   2   8  -8    0.08    0.32   1
  -2  -8   8   -0.08    0.25   1
  -2  -8   8    0.16    0.32   1
  -2  -8   8   -0.10    0.28   1
  -2  -8   8   -0.16    0.16   1
   1   8  -8   -0.13    0.27   1
  -1  -8   8   -0.31    0.24   1
  -1  -8   8   -0.23    0.15   1
  -1  -8   8    0.15    0.27   1
   0  -8  -9    0.71    0.30  -2
   0   8  -8    0.71    0.30   1
   0   8   9    0.87    0.30  -2
   0  -8   8    0.87    0.30   1
   0   8   9    0.81    0.29  -2
   0  -8   8    0.81    0.29   1
   1  -8   8    0.72    0.32   1
   1  -8   8    0.38    0.31   1
   2  -8   8    2.52    0.43   1
   2  -8   8    1.61    0.45   1
   2  -8   8    2.67    0.40   1
  -5  -7   8   -0.06    0.22   1
  -5  -7   8   -0.14    0.15   1
  -4  -7 -10    1.00    0.32  -2
   4   7  -8    1.00    0.32   1
   4   7  10    0.54    0.27  -2
  -4  -7   8    0.54    0.27   1
   4   7  10    0.66    0.33  -2
  -4  -7   8    0.66    0.33   1
   4   7  10    1.06    0.31  -2
  -4  -7   8    1.06    0.31   1
   3   7  -8   -0.26    0.29   1
  -3  -7   8    0.22    0.24   1
  -3  -7   8   -0.03    0.28   1
  -3  -7   8    0.19    0.24   1
   2   7  -8    1.33    0.32   1
  -2  -7   8    0.85    0.29   1
  -2  -7   8    1.41    0.27   1
  -2  -7   8    1.18    0.29   1
  -2  -7   8    0.59    0.29   1
   1   7  -8    1.00    0.30   1
  -1  -7   8    0.26    0.28   1
  -1  -7   8    1.18    0.26   1
  -1  -7   8    1.07    0.23   1
  -1  -7   8    0.55    0.25   1
   0  -7  -9    0.03    0.25  -2
   0   7  -8    0.03    0.25   1
   0   7   9    0.44    0.26  -2
   0  -7   8    0.44    0.26   1
   0   7   9    0.07    0.24  -2
   0  -7   8    0.07    0.24   1
   1  -7   8    0.14    0.21   1
   1  -7   8    0.31    0.27   1
  -2   7  -8    2.78    0.40   1
   2  -7   8    3.25    0.41   1
   2  -7   8    2.84    0.44   1
   2  -7   8    4.03    0.44   1
   3  -7  -8   -0.03    0.28  -2
  -3   7  -8   -0.03    0.28   1
  -3   7   8   -0.06    0.34  -2
   3  -7   8   -0.06    0.34   1
  -3   7   8    0.01    0.32  -2
   3  -7   8    0.01    0.32   1
  -3   7   8   -0.11    0.31  -2
   3  -7   8   -0.11    0.31   1
  -4   7  -8   -0.37    0.40   1
   4  -7   8   -0.49    0.37   1
   4  -7   8    0.43    0.30   1
   5   6  -8    0.04    0.26   1
  -5  -6   8    0.06    0.21   1
  -5  -6   8   -0.41    0.27   1
  -4  -6 -10    0.39    0.29  -2
   4   6  -8    0.39    0.29   1
   4   6  10    0.20    0.21  -2
  -4  -6   8    0.20    0.21   1
   4   6  10    0.40    0.22  -2
  -4  -6   8    0.40    0.22   1
   4   6  10    0.01    0.27  -2
  -4  -6   8    0.01    0.27   1
   3   6  -8    0.15    0.27   1
  -3  -6   8    0.10    0.22   1
  -3  -6   8    0.07    0.20   1
  -3  -6   8    0.16    0.26   1
   2   6  -8    0.13    0.27   1
  -2  -6   8   -0.11    0.25   1
  -2  -6   8   -0.06    0.23   1
  -2  -6   8    0.18    0.23   1
  -2  -6   8    0.17    0.19   1
  -1  -6  -9    2.39    0.32  -2
   1   6  -8    2.39    0.32   1
   1   6   9    1.84    0.26  -2
  -1  -6   8    1.84    0.26   1
   1   6   9    1.64    0.31  -2
  -1  -6   8    1.64    0.31   1
   1   6   9    1.82    0.33  -2
  -1  -6   8    1.82    0.33   1
   1   6   9    2.07    0.30  -2
  -1  -6   8    2.07    0.30   1
   0   6  -8    0.31    0.22   1
   0  -6   8    1.02    0.23   1
   0  -6   8    0.58    0.25   1
   0  -6   8    0.30    0.21   1
   1  -6   8    3.60    0.43   1
   1  -6   8    3.79    0.41   1
   1  -6   8    3.31    0.41   1
  -2   6  -8   -0.01    0.24   1
   2  -6   8    0.05    0.27   1
   2  -6   8    0.35    0.24   1
   2  -6   8    0.33    0.26   1
   3  -6  -8    1.04    0.30  -2
  -3   6  -8    1.04    0.30   1
  -3   6   8    0.65    0.31  -2
   3  -6   8    0.65    0.31   1
  -3   6   8    0.77    0.29  -2
   3  -6   8    0.77    0.29   1
  -3   6   8    0.61    0.33  -2
   3  -6   8    0.61    0.33   1
  -4   6  -8   -0.11    0.30   1
   4  -6   8    0.04    0.35   1
   4  -6   8   -0.23    0.31   1
   4  -6   8    0.34    0.34   1
  -5   6  -8    0.31    0.36   1
   5  -6   8    0.34    0.44   1
   5  -6   8    0.69    0.39   1
   5  -6   8    0.75    0.42   1
   6   5  -8    0.04    0.27   1
  -6  -5   8    0.13    0.23   1
  -5  -5 -10    0.05    0.25  -2
   5   5  -8    0.05    0.25   1
   5   5  10    0.51    0.25  -2
  -5  -5   8    0.51    0.25   1
   4   5  -8    0.65    0.28   1
  -4  -5   8    0.67    0.23   1
  -4  -5   8    0.42    0.25   1
   3   5  -8    0.63    0.26   1
  -3  -5   8    0.30    0.26   1
  -3  -5   8    0.17    0.18   1
  -3  -5   8    0.38    0.23   1
   2   5  -8    0.78    0.24   1
  -2  -5   8    0.59    0.23   1
  -2  -5   8    0.30    0.21   1
  -2  -5   8    0.82    0.18   1
  -1  -5  -9    0.75    0.22  -2
   1   5  -8    0.75    0.22   1
   1   5   9    0.49    0.20  -2
  -1  -5   8    0.49    0.20   1
   1   5   9    0.78    0.20  -2
  -1  -5   8    0.78    0.20   1
   1   5   9    0.47    0.23  -2
  -1  -5   8    0.47    0.23   1
   0   5  -8    0.03    0.16   1
   0  -5   8   -0.03    0.20   1
   0  -5   8   -0.03    0.20   1
   0  -5   8    0.16    0.20   1
   1  -5   8    3.42    0.41   1
   1  -5   8    3.57    0.40   1
   1  -5   8    4.13    0.43   1
   2  -5  -8   -0.04    0.22  -2
  -2   5  -8   -0.04    0.22   1
  -2   5   8   -0.36    0.22  -2
   2  -5   8   -0.36    0.22   1
  -2   5   8    0.48    0.25  -2
   2  -5   8    0.48    0.25   1
  -2   5   8    0.26    0.25  -2
   2  -5   8    0.26    0.25   1
  -3   5  -8    0.07    0.25   1
  -3   5  -8    0.07    0.21   1
   3  -5   8    0.49    0.26   1
   3  -5   8    0.32    0.26   1
   3  -5   8    0.08    0.24   1
  -4   5  -8    0.70    0.34   1
   4  -5   8    0.50    0.28   1
   4  -5   8    0.77    0.28   1
   4  -5   8    0.99    0.32   1
  -5   5  -8    0.41    0.31   1
   5  -5   8   -0.01    0.32   1
   5  -5   8    0.55    0.33   1
   5  -5   8    0.77    0.35   1
   6   4  -8    0.10    0.25   1
  -6  -4   8    0.31    0.24   1
  -6  -4   8    0.25    0.26   1
  -5  -4 -10   -0.03    0.23  -2
   5   4  -8   -0.03    0.23   1
   5   4  10    0.10    0.23  -2
  -5  -4   8    0.10    0.23   1
   5   4  10   -0.09    0.20  -2
  -5  -4   8   -0.09    0.20   1
   4   4  -8    0.18    0.24   1
  -4  -4   8    0.02    0.20   1
  -4  -4   8    0.31    0.22   1
  -4  -4   8    0.16    0.18   1
   3   4  -8    1.56    0.28   1
  -3  -4   8    1.40    0.24   1
  -3  -4   8    1.22    0.26   1
  -2  -4  -9    3.17    0.36  -2
   2   4  -8    3.17    0.36   1
  -2  -4  -9    2.82    0.29  -2
   2   4  -8    2.82    0.29   1
   2   4   9    2.66    0.34  -2
  -2  -4   8    2.66    0.34   1
   2   4   9    3.31    0.30  -2
  -2  -4   8    3.31    0.30   1
   2   4   9    2.28    0.33  -2
  -2  -4   8    2.28    0.33   1
   1   4  -8    0.99    0.20   1
   1   4  -8    0.86    0.18   1
   1   4  -8    0.49    0.14   1
  -1  -4   8    1.04    0.23   1
  -1  -4   8    0.88    0.20   1
   0   4  -8    4.07    0.41   1
   0  -4   8    3.98    0.45   1
   0  -4   8    4.48    0.43   1
   0  -4   8    4.22    0.44   1
  -1   4  -8   -0.06    0.17   1
   1  -4   8   -0.43    0.18   1
   1  -4   8   -0.08    0.19   1
   1  -4   8   -0.04    0.19   1
   2  -4  -8    2.38    0.32  -2
  -2   4  -8    2.38    0.32   1
  -2   4   8    2.52    0.33  -2
   2  -4   8    2.52    0.33   1
  -2   4   8    2.16    0.31  -2
   2  -4   8    2.16    0.31   1
  -2   4   8    2.47    0.32  -2
   2  -4   8    2.47    0.32   1
  -3   4  -8    0.30    0.21   1
  -3   4  -8   -0.18    0.24   1
   3  -4   8    0.16    0.23   1
   3  -4   8    0.25    0.25   1
   3  -4   8    0.21    0.23   1
  -4   4  -8    1.35    0.32   1
  -4   4  -8    0.53    0.23   1
   4  -4   8    0.99    0.28   1
   4  -4   8    0.37    0.24   1
   4  -4   8    0.82    0.29   1
   5  -4  -7    0.01    0.19  -2
  -5   4  -8    0.01    0.19   1
   5  -4  -7   -0.14    0.33  -2
  -5   4  -8   -0.14    0.33   1
  -5   4   7   -0.19    0.21  -2
   5  -4   8   -0.19    0.21   1
  -5   4   7    0.11    0.27  -2
   5  -4   8    0.11    0.27   1
  -5   4   7    0.16    0.29  -2
   5  -4   8    0.16    0.29   1
  -6   4  -8    0.69    0.38   1
   6  -4   8    0.56    0.33   1
   6  -4   8    0.96    0.37   1
   7   3  -8    0.06    0.28   1
   7   3  -8    0.19    0.29   1
  -7  -3   8   -0.24    0.25   1
  -7  -3   8    0.46    0.30   1
  -6  -3 -10    0.11    0.22  -2
   6   3  -8    0.11    0.22   1
  -6  -3 -10    0.07    0.27  -2
   6   3  -8    0.07    0.27   1
   6   3  10    0.13    0.22  -2
  -6  -3   8    0.13    0.22   1
   6   3  10   -0.19    0.27  -2
  -6  -3   8   -0.19    0.27   1
   5   3  -8    1.33    0.25   1
   5   3  -8    1.32    0.30   1
  -5  -3   8    1.45    0.29   1
  -5  -3   8    0.93    0.24   1
   4   3  -8    0.12    0.21   1
  -4  -3   8   -0.07    0.17   1
  -4  -3   8   -0.05    0.22   1
  -4  -3   8    0.17    0.18   1
   3   3  -8    3.69    0.38   1
  -3  -3   8    2.99    0.35   1
  -3  -3   8    3.16    0.32   1
  -3  -3   8    3.32    0.37   1
  -2  -3  -9    0.71    0.19  -2
   2   3  -8    0.71    0.19   1
  -2  -3  -9    0.60    0.13  -2
   2   3  -8    0.60    0.13   1
   2   3   9    0.83    0.20  -2
  -2  -3   8    0.83    0.20   1
   2   3   9    0.54    0.20  -2
  -2  -3   8    0.54    0.20   1
   2   3   9    0.75    0.16  -2
  -2  -3   8    0.75    0.16   1
   2   3   9    0.71    0.13  -2
  -2  -3   8    0.71    0.13   1
   1   3  -8    2.71    0.31   1
   1   3  -8    2.43    0.27   1
   1   3  -8    3.03    0.31   1
  -1  -3   8    3.06    0.32   1
  -1  -3   8    2.39    0.27   1
  -1  -3   8    2.81    0.29   1
  -1  -3   8    2.23    0.30   1
   0   3  -8    1.40    0.20   1
   0   3  -8    1.27    0.20   1
   0   3  -8    2.08    0.23   1
   0  -3   8    1.62    0.25   1
   0  -3   8    1.57    0.23   1
   0  -3   8    1.81    0.24   1
   0  -3   8    2.25    0.23   1
  -1   3   8    0.15    0.19  -2
   1  -3   8    0.15    0.19   1
  -1   3   8    0.25    0.16  -2
   1  -3   8    0.25    0.16   1
  -1   3   8    0.13    0.18  -2
   1  -3   8    0.13    0.18   1
  -1   3   8    0.07    0.18  -2
   1  -3   8    0.07    0.18   1
  -2   3  -8   -0.02    0.19   1
   2  -3   8    0.02    0.17   1
   2  -3   8    0.14    0.19   1
   2  -3   8    0.36    0.19   1
   2  -3   8    0.19    0.21   1
  -3   3  -8    1.95    0.31   1
  -3   3  -8    1.63    0.28   1
   3  -3   8    1.49    0.26   1
   3  -3   8    1.98    0.28   1
   3  -3   8    1.65    0.28   1
  -4   3  -8    2.25    0.34   1
  -4   3  -8    2.29    0.31   1
   4  -3   8    2.25    0.32   1
   4  -3   8    1.37    0.26   1
   4  -3   8    2.29    0.32   1
   5  -3  -7    0.84    0.24  -2
  -5   3  -8    0.84    0.24   1
   5  -3  -7    1.49    0.36  -2
  -5   3  -8    1.49    0.36   1
  -5   3   7    1.70    0.30  -2
   5  -3   8    1.70    0.30   1
  -5   3   7    1.52    0.32  -2
   5  -3   8    1.52    0.32   1
  -6   3  -8    2.56    0.42   1
   6  -3   8    1.37    0.35   1
   6  -3   8    1.48    0.35   1
   7   2  -8    0.13    0.25   1
   7   2  -8   -0.13    0.30   1
  -7  -2   8    0.21    0.31   1
  -7  -2   8   -0.13    0.23   1
  -6  -2 -10   -0.11    0.20  -2
   6   2  -8   -0.11    0.20   1
  -6  -2 -10    0.45    0.27  -2
   6   2  -8    0.45    0.27   1
   6   2  10    0.04    0.21  -2
  -6  -2   8    0.04    0.21   1
   6   2  10   -0.03    0.27  -2
  -6  -2   8   -0.03    0.27   1
   5   2  -8    0.01    0.23   1
   5   2  -8    0.18    0.19   1
  -5  -2   8    0.17    0.20   1
  -5  -2   8   -0.01    0.24   1
   4   2  -8    4.94    0.50   1
   4   2  -8    4.51    0.44   1
   4   2  -8    4.61    0.45   1
  -4  -2   8    4.71    0.51   1
  -4  -2   8    4.81    0.48   1
  -3  -2  -9    4.20    0.44  -2
   3   2  -8    4.20    0.44   1
  -3  -2  -9    4.43    0.41  -2
   3   2  -8    4.43    0.41   1
  -3  -2  -9    4.14    0.41  -2
   3   2  -8    4.14    0.41   1
   3   2   9    3.72    0.41  -2
  -3  -2   8    3.72    0.41   1
   3   2   9    4.55    0.43  -2
  -3  -2   8    4.55    0.43   1
   3   2   9    4.41    0.46  -2
  -3  -2   8    4.41    0.46   1
   2   2  -8    5.66    0.48   1
   2   2  -8    5.33    0.49   1
   2   2  -8    4.62    0.44   1
  -2  -2   8    5.80    0.45   1
  -2  -2   8    5.21    0.49   1
  -2  -2   8    4.56    0.45   1
  -2  -2   8    5.00    0.45   1
  -2  -2   8    4.91    0.48   1
   1   2  -8    6.60    0.56   1
   1   2  -8    7.00    0.58   1
   1   2  -8    6.67    0.58   1
   1   2  -8    7.39    0.58   1
  -1  -2   8    6.22    0.61   1
  -1  -2   8    6.14    0.59   1
  -1  -2   8    6.86    0.58   1
   0   2  -8    0.18    0.16   1
   0   2  -8    0.12    0.14   1
   0   2  -8    0.16    0.13   1
   0   2  -8    0.09    0.15   1
   0  -2   8   -0.07    0.17   1
   0  -2   8    0.01    0.17   1
   0  -2   8    0.01    0.19   1
   0  -2   8   -0.25    0.16   1
   1  -2  -8    6.52    0.58  -2
  -1   2  -8    6.52    0.58   1
   1  -2  -8    6.78    0.59  -2
  -1   2  -8    6.78    0.59   1
  -1   2   8    7.42    0.60  -2
   1  -2   8    7.42    0.60   1
  -1   2   8    6.59    0.62  -2
   1  -2   8    6.59    0.62   1
  -1   2   8    7.53    0.60  -2
   1  -2   8    7.53    0.60   1
  -1   2   8    6.87    0.59  -2
   1  -2   8    6.87    0.59   1
  -1   2   8    6.61    0.58  -2
   1  -2   8    6.61    0.58   1
  -2   2  -8    0.31    0.19   1
  -2   2  -8    0.11    0.11   1
   2  -2   8    0.06    0.18   1
   2  -2   8    0.09    0.19   1
   2  -2   8    0.34    0.18   1
   2  -2   8    0.37    0.18   1
  -3   2  -8    2.15    0.30   1
  -3   2  -8    2.15    0.31   1
   3  -2   8    2.37    0.28   1
   3  -2   8    2.29    0.25   1
   3  -2   8    1.64    0.27   1
   3  -2   8    1.81    0.27   1
   4  -2  -7    0.83    0.27  -2
  -4   2  -8    0.83    0.27   1
   4  -2  -7    0.49    0.22  -2
  -4   2  -8    0.49    0.22   1
  -4   2   7    0.35    0.18  -2
   4  -2   8    0.35    0.18   1
  -4   2   7    0.75    0.24  -2
   4  -2   8    0.75    0.24   1
  -4   2   7    0.95    0.23  -2
   4  -2   8    0.95    0.23   1
  -5   2  -8    0.91    0.24   1
  -5   2  -8    1.51    0.35   1
   5  -2   8    0.97    0.26   1
   5  -2   8    0.84    0.25   1
  -6   2  -8    4.98    0.54   1
   6  -2   8    3.41    0.46   1
   6  -2   8    3.69    0.45   1
  -7   2  -8    0.18    0.35   1
   7  -2   8    0.55    0.23   1
   7  -2   8    0.19    0.29   1
   7  -2   8   -0.27    0.33   1
  -7  -1 -10    0.13    0.25  -2
   7   1  -8    0.13    0.25   1
  -7  -1 -10   -0.66    0.28  -2
   7   1  -8   -0.66    0.28   1
   7   1  10   -0.05    0.28  -2
  -7  -1   8   -0.05    0.28   1
   7   1  10    0.08    0.28  -2
  -7  -1   8    0.08    0.28   1
   7   1  10    0.26    0.32  -2
  -7  -1   8    0.26    0.32   1
   6   1  -8    1.16    0.27   1
   6   1  -8    1.30    0.32   1
  -6  -1   8    1.20    0.29   1
  -6  -1   8    1.55    0.30   1
  -6  -1   8    0.88    0.31   1
   5   1  -8    0.46    0.20   1
   5   1  -8    0.80    0.27   1
  -5  -1   8    0.65    0.23   1
  -5  -1   8    0.72    0.26   1
  -5  -1   8    0.14    0.24   1
   4   1  -8    7.06    0.61   1
   4   1  -8    6.72    0.64   1
  -4  -1   8    7.15    0.64   1
  -4  -1   8    7.35    0.65   1
  -4  -1   8    6.78    0.62   1
  -3  -1  -9    1.36    0.19  -2
   3   1  -8    1.36    0.19   1
  -3  -1  -9    1.20    0.18  -2
   3   1  -8    1.20    0.18   1
  -3  -1  -9    1.55    0.24  -2
   3   1  -8    1.55    0.24   1
  -3  -1  -9    1.26    0.18  -2
   3   1  -8    1.26    0.18   1
   3   1   9    1.51    0.20  -2
  -3  -1   8    1.51    0.20   1
   3   1   9    1.20    0.21  -2
  -3  -1   8    1.20    0.21   1
   3   1   9    1.31    0.23  -2
  -3  -1   8    1.31    0.23   1
   3   1   9    1.26    0.23  -2
  -3  -1   8    1.26    0.23   1
   2   1  -8    7.20    0.62   1
   2   1  -8    8.31    0.62   1
   2   1  -8    7.51    0.59   1
   2   1  -8    7.28    0.59   1
  -2  -1   8    7.63    0.63   1
  -2  -1   8    6.48    0.61   1
  -2  -1   8    6.72    0.61   1
  -2  -1   8    6.31    0.62   1
   1   1  -8    0.49    0.16   1
   1   1  -8    0.22    0.13   1
   1   1  -8    0.12    0.12   1
   1   1  -8    0.12    0.16   1
  -1  -1   8    0.33    0.17   1
  -1  -1   8    0.22    0.14   1
  -1  -1   8    0.17    0.17   1
  -1  -1   8    0.01    0.15   1
   0  -1  -8    0.08    0.13  -2
   0   1  -8    0.08    0.13   1
   0  -1  -8    0.20    0.14  -2
   0   1  -8    0.20    0.14   1
   0  -1  -8    0.08    0.13  -2
   0   1  -8    0.08    0.13   1
   0  -1  -8    0.47    0.18  -2
   0   1  -8    0.47    0.18   1
   0   1   8    0.37    0.17  -2
   0  -1   8    0.37    0.17   1
   0   1   8    0.14    0.16  -2
   0  -1   8    0.14    0.16   1
   0   1   8    0.08    0.15  -2
   0  -1   8    0.08    0.15   1
   0   1   8    0.04    0.17  -2
   0  -1   8    0.04    0.17   1
  -1   1  -8    0.51    0.15   1
  -1   1  -8    0.58    0.16   1
  -1   1  -8    1.13    0.19   1
  -1   1  -8    0.75    0.16   1
   1  -1   8    0.31    0.17   1
   1  -1   8    0.35    0.17   1
   1  -1   8    0.23    0.18   1
   1  -1   8    0.42    0.17   1
   1  -1   8    0.43    0.17   1
  -2   1  -8    5.21    0.45   1
  -2   1  -8    4.74    0.45   1
  -2   1  -8    5.49    0.51   1
   2  -1   8    4.97    0.44   1
   2  -1   8    4.86    0.47   1
   2  -1   8    4.31    0.46   1
   2  -1   8    5.49    0.48   1
   2  -1   8    5.43    0.48   1
  -3   1  -8    5.92    0.49   1
  -3   1  -8    5.98    0.52   1
   3  -1   8    5.68    0.49   1
   3  -1   8    5.20    0.51   1
   3  -1   8    5.12    0.51   1
   3  -1   8    4.94    0.49   1
   4  -1  -7    3.66    0.43  -2
  -4   1  -8    3.66    0.43   1
  -4   1   7    3.82    0.41  -2
   4  -1   8    3.82    0.41   1
  -4   1   7    4.39    0.42  -2
   4  -1   8    4.39    0.42   1
  -5   1  -8    1.48    0.32   1
   5  -1   8    1.51    0.26   1
   5  -1   8    1.78    0.30   1
  -6   1  -8    0.00    0.27   1
   6  -1   8   -0.04    0.23   1
   6  -1   8    0.39    0.21   1
   6  -1   8    0.06    0.21   1
  -7   1   6    0.83    0.33  -2
   7  -1   8    0.83    0.33   1
  -7   1   6    0.89    0.31  -2
   7  -1   8    0.89    0.31   1
  -7   1   6    1.17    0.29  -2
   7  -1   8    1.17    0.29   1
  -7   0 -10   -0.04    0.24  -2
   7   0  -8   -0.04    0.24   1
  -7   0 -10   -0.15    0.30  -2
   7   0  -8   -0.15    0.30   1
   7   0  10    0.27    0.30  -2
  -7   0   8    0.27    0.30   1
   7   0  10   -0.02    0.31  -2
  -7   0   8   -0.02    0.31   1
   6   0  -8   -0.13    0.28   1
   6   0  -8    0.15    0.22   1
  -6   0   8   -0.14    0.28   1
  -6   0   8    0.00    0.25   1
  -6   0   8   -0.21    0.29   1
   5   0  -8    7.90    0.68   1
   5   0  -8    7.60    0.69   1
  -5   0   8    6.34    0.69   1
  -5   0   8    7.65    0.70   1
  -5   0   8    6.96    0.71   1
  -4   0  -9    4.39    0.39  -2
   4   0  -8    4.39    0.39   1
  -4   0  -9    3.97    0.40  -2
   4   0  -8    3.97    0.40   1
   4   0   9    2.97    0.38  -2
  -4   0   8    2.97    0.38   1
   4   0   9    2.42    0.35  -2
  -4   0   8    2.42    0.35   1
   3   0  -8    5.76    0.52   1
   3   0  -8    5.55    0.48   1
   3   0  -8    5.11    0.47   1
   3   0  -8    6.49    0.50   1
  -3   0   8    5.86    0.51   1
  -3   0   8    5.07    0.51   1
  -3   0   8    4.71    0.50   1
  -3   0   8    4.86    0.52   1
   2   0  -8    5.97    0.51   1
   2   0  -8    5.50    0.49   1
   2   0  -8    5.54    0.53   1
  -2   0   8    4.96    0.51   1
  -2   0   8    6.11    0.51   1
  -2   0   8    5.14    0.51   1
  -2   0   8    6.02    0.51   1
   1   0  -8    0.04    0.14   1
   1   0  -8    0.01    0.14   1
   1   0  -8    0.11    0.17   1
   1   0  -8    0.12    0.13   1
  -1   0   8   -0.09    0.16   1
  -1   0   8   -0.03    0.16   1
  -1   0   8    0.10    0.16   1
  -1   0   8   -0.03    0.17   1
   0   0  -8   12.89    1.04  -2
   0   0  -8   12.89    1.04   1
   0   0  -8   12.80    1.04  -2
   0   0  -8   12.80    1.04   1
   0   0  -8   13.67    1.04  -2
   0   0  -8   13.67    1.04   1
   0   0  -8   13.94    1.05  -2
   0   0  -8   13.94    1.05   1
   0   0   8   13.28    1.05  -2
   0   0   8   13.28    1.05   1
   0   0   8   12.29    1.06  -2
   0   0   8   12.29    1.06   1
   0   0   8   12.97    1.04  -2
   0   0   8   12.97    1.04   1
  -1   0  -8    0.10    0.17   1
  -1   0  -8    0.05    0.14   1
  -1   0  -8    0.07    0.15   1
  -1   0  -8    0.39    0.16   1
  -1   0  -8    0.04    0.14   1
   1   0   8    0.07    0.15   1
   1   0   8    0.14    0.18   1
   1   0   8    0.12    0.17   1
   1   0   8    0.08    0.18   1
  -2   0  -8    3.94    0.37   1
  -2   0  -8    4.31    0.40   1
  -2   0  -8    4.59    0.40   1
  -2   0  -8    3.70    0.41   1
  -2   0  -8    4.15    0.39   1
   2   0   8    3.88    0.43   1
   2   0   8    4.32    0.41   1
   2   0   8    3.81    0.39   1
   2   0   8    3.75    0.41   1
   2   0   8    3.31    0.39   1
  -3   0  -8    2.65    0.30   1
  -3   0  -8    1.94    0.22   1
  -3   0  -8    1.96    0.22   1
  -3   0  -8    1.46    0.21   1
   3   0   8    1.94    0.24   1
   3   0   8    2.24    0.26   1
   3   0   8    1.92    0.23   1
   3   0   8    1.99    0.25   1
   3   0   8    1.97    0.27   1
   4   0  -7    0.94    0.23  -2
  -4   0  -8    0.94    0.23   1
  -4   0   7    0.93    0.20  -2
   4   0   8    0.93    0.20   1
  -4   0   7    0.67    0.21  -2
   4   0   8    0.67    0.21   1
  -4   0   7    0.92    0.19  -2
   4   0   8    0.92    0.19   1
   5   0   8    5.18    0.49   1
   5   0   8    5.33    0.51   1
   5   0   8    4.62    0.50   1
   6   0   8   -0.03    0.20   1
   6   0   8    0.25    0.21   1
   6   0   8   -0.11    0.21   1
  -7   0   6    1.92    0.38  -2
   7   0   8    1.92    0.38   1
  -7   0   6    2.41    0.36  -2
   7   0   8    2.41    0.36   1
  -7   1 -10    0.81    0.28  -2
   7  -1  -8    0.81    0.28   1
  -7   1 -10    0.75    0.33  -2
   7  -1  -8    0.75    0.33   1
   7  -1  10    0.83    0.40  -2
  -7   1   8    0.83    0.40   1
   7  -1  10    0.69    0.34  -2
  -7   1   8    0.69    0.34   1
   6  -1  -8    0.52    0.22   1
   6  -1  -8    0.40    0.28   1
  -6   1   8    0.75    0.29   1
  -6   1   8    0.55    0.31   1
   5  -1  -8    4.69    0.56   1
  -5   1   8    5.53    0.56   1
  -5   1   8    5.61    0.58   1
  -4   1  -9    0.72    0.16  -2
   4  -1  -8    0.72    0.16   1
  -4   1  -9    0.40    0.19  -2
   4  -1  -8    0.40    0.19   1
  -4   1  -9    0.68    0.25  -2
   4  -1  -8    0.68    0.25   1
  -4   1  -9    0.70    0.18  -2
   4  -1  -8    0.70    0.18   1
   4  -1   9    0.93    0.24  -2
  -4   1   8    0.93    0.24   1
   4  -1   9    1.03    0.27  -2
  -4   1   8    1.03    0.27   1
   4  -1   9    0.82    0.22  -2
  -4   1   8    0.82    0.22   1
   4  -1   9    1.01    0.27  -2
  -4   1   8    1.01    0.27   1
   3  -1  -8    4.66    0.48   1
   3  -1  -8    4.43    0.45   1
   3  -1  -8    4.72    0.43   1
  -3   1   8    5.28    0.48   1
  -3   1   8    5.50    0.47   1
  -3   1   8    4.51    0.48   1
  -3   1   8    4.61    0.48   1
  -3   1   8    4.62    0.45   1
   2  -1  -8    0.32    0.17   1
   2  -1  -8    0.01    0.14   1
   2  -1  -8   -0.01    0.15   1
   2  -1  -8    0.13    0.14   1
  -2   1   8    0.28    0.20   1
  -2   1   8   -0.24    0.12   1
  -2   1   8   -0.01    0.18   1
  -2   1   8   -0.02    0.16   1
   1  -1  -8    0.00    0.15   1
   1  -1  -8    0.05    0.14   1
   1  -1  -8   -0.06    0.14   1
   1  -1  -8    0.08    0.15   1
  -1   1   8    0.33    0.19   1
  -1   1   8    0.16    0.18   1
  -1   1   8    0.15    0.18   1
   0   1  -8    0.35    0.15  -2
   0  -1  -8    0.35    0.15   1
   0   1  -8    0.45    0.18  -2
   0  -1  -8    0.45    0.18   1
   0   1  -8    0.29    0.14  -2
   0  -1  -8    0.29    0.14   1
   0   1  -8    0.27    0.14  -2
   0  -1  -8    0.27    0.14   1
   0  -1   8    0.42    0.17  -2
   0   1   8    0.42    0.17   1
   0  -1   8    0.36    0.17  -2
   0   1   8    0.36    0.17   1
   0  -1   8    0.54    0.17  -2
[truncated: 289,797 more chars]
